# Supplementary material for: Targeted Quantification of Detergent-Insoluble RNA-Binding Proteins in Human Brain Reveals Stage and Disease Specific Co-aggregation in Alzheimer’s Disease
Source: Front Mol Neurosci. 2021 Mar 18;14:623659. doi: 10.3389/fnmol.2021.623659 (PMC8014091; doi:10.3389/fnmol.2021.623659)
Supplement: Supplementary Table 1 — Summary of case information. [file Table_1.xlsx]

## Sheet: Table S1
Table S1. Summary of case information
CaseID	RAWfileID	Grouping	CERAD	Braak	ABC Score	Age	Sex	PMI	Duration	DLB Neocortex	Genotype
A86-46	3_4	Control	1	1	low	65	1	6	0	NA	ApoE3/3
A87-50	4_4	Control	0	2	none	66	1	10	0	NA	ApoE3/3
A93-03	2_4	Control	0	1	low	70	1	4.5	0	NA	ApoE3/3
OS99-08	3_5	Control	0	1	none	74	0	3	0	NA	ApoE3/3
OS00-23	2_5	Control	0	0	low	68	0	11	0	NA	ApoE3/3
OS02-35	1_4	Control	0	1	none	75	0	6	0	NA	ApoE3/3
OS03-299	2_6	Control	0	2	low	69	1	6	0	NA	ApoE3/3
E08-101	1_5	Control	0	2	none	78	0	11.5	0	NA	ApoE3/3
E08-137	1_6	Control	0	3	none	92	0	15.5	0	NA	ApoE3/3
E10-142	4_5	Control	0	2	none	94	1	5.5	0	NA	ApoE3/3
E13-27	4_6	Control	1	3	low	91	0	6	0	NA	ApoE3/3
E16-45	3_6	Control	0	1	low	70	1	2.5	0	NA	ApoE3/3
OS94-54	3_10	AsymAD	3	4	intermediate	96	0	17.5	0	NA	ApoE3/3
OS02-270	2_10	AsymAD	2	1	low	87	1	20.5	0	NA	ApoE3/4
OS03-394	1_10	AsymAD	3	3	intermediate	87	0	5	0	NA	ApoE2/3
E05-54	1_11	AsymAD	3	2	intermediate	64	0	17	0	NA	ApoE4/4
E04-74	1_12	AsymAD	3	4	intermediate	76	1	35.5	0	NA	ApoE2/4
E15-97	2_11	AsymAD	3	4	intermediate	80	1	5.5	0	NA	ApoE3/4
E05-184	2_12	AsymAD	2	2	low	81	1	20	0	NA	ApoE3/3
E13-49	3_11	AsymAD	3	4	intermediate	89	1	19	0	NA	ApoE3/3
OS00-12	2_1	AD	3	5	high	72	1	6	3	NA	ApoE3/4
E05-80	4_1	AD	3	6	high	83	1	8.5	NA	NA	ApoE4/4
OS03-300	4_2	AD	3	6	high	75	0	12	15	NA	ApoE4/4
E04-76	2_2	AD	3	6	high	72	1	30.5	7	NA	ApoE4/4
E04-186	1_1	AD	3	6	high	72	0	7	13	NA	ApoE3/4
E06-155	1_2	AD	3	6	high	67	1	6.5	11	NA	ApoE2/3
E06-190	1_3	AD	3	6	high	93	0	5	NA	NA	ApoE3/4
E07-26	3_1	AD	3	6	high	85	1	4	11	NA	ApoE3/4
E08-53	3_2	AD	3	6	high	78	0	8	10	NA	ApoE3/3
E08-142	3_3	AD	3	6	high	77	1	21	17	NA	ApoE3/4
E11-97	2_3	AD	3	6	high	74	1	2.5	14	NA	ApoE3/3
E16-66	4_3	AD	3	6	high	69	1	3.5	10	NA	ApoE3/4
OS02-66	2_8	PD	0	0	none	74	1	4.5	11	0	ApoE3/3
OS03-392	3_7	PD	0	0	none	62	0	19	3.5	1	ApoE3/3
OS03-395	3_8	PD	0	2	none	78	1	10	32	1	ApoE3/3
E07-60	2_9	PD	0	1	none	72	1	24	11	0	ApoE2/3
E09-136	4_8	PD	0	3	low	72	0	22	11	1	ApoE3/4
E12-48	3_9	PD	0	4	low	82	1	16	35	1	ApoE3/4
OS-140327	1_9	PD	1	3	low	86	1	12.9	9	1	ApoE3/3
E15-132	4_9	PD	0	3	none	75	1	15.5	21	1	ApoE2/3
OS97-53	4_7	PD	0	3	low	72	0	4.5	15	0	ApoE2/3
OS99-05	1_7	PD	1	2	low	75	1	19	20	0	ApoE2/3
OS99-26	2_7	PD	0	3	none	79	1	2	15	0	ApoE2/3
OS01-70	1_8	PD	0	2	none	74	1	5	26	0	ApoE2/3

## Sheet: Table S2
Table S2. Sarkosyl-soluble and -insoluble protein yields															Tukey P values
							Actual	Adjusted Calc.
CaseID	RAWfileID	Grouping	Tissue Weight (mg)	TH† Conc. (µg/µl)	Sark-insol. Conc (µg/µl)	TH Protein Wet Weight Yield (mg)	Sark-insol. Pellet in 8M Urea (mg)	Sark-insol. Est. Full Yield in 8M Urea (mg)*	Sark-insol. Yield % of TH Yield				F-Value	Pr(>F)	AsymAD vs. AD	Control vs. AD	PD vs. AD	Control vs. AsymAD	PD vs. AsymAD	PD vs. Control
A86-46	3_4	Control	205	12.313	4.499	14.6077	0.35992	1.3144	0.08998			fracYield	1.11963	0.352553	0.841824	0.820845	0.922421	0.388506	0.993438	0.448851
A87-50	4_4	Control	220	13.253	4.3	15.9036	0.344	1.09417	0.0688
A93-03	2_4	Control	204	11.558	5.381	13.7015	0.43048	1.47455	0.10762						Difference in Percent Insoluble/Soluble Yield
OS99-08	3_5	Control	202	13.649	1.294	16.1555	0.10352	0.418103	0.02588
OS00-23	2_5	Control	198	13.345	3.161	15.7471	0.25288	0.995532	0.06322						diff AsymAD-AD	diff Control-AD	diff PD-AD	diff Control-AsymAD	diff PD-AsymAD	diff PD-Control
OS02-35	1_4	Control	206	12.915	1.349	15.3336	0.10792	0.330961	0.021584						-0.00864217	0.00813033	-0.00587767	0.0167725	0.0027645	-0.014008
OS03-299	2_6	Control	212	11.374	2.953	13.5661	0.23624	0.801213	0.05906
E08-101	1_5	Control	200	13.213	1.977	15.6154	0.15816	0.493945	0.031632
E08-137	1_6	Control	220	11.877	1.731	14.2524	0.13848	0.394734	0.027696
E10-142	4_5	Control	216	12.259	0.913	14.6662	0.07304	0.214244	0.014608
E13-27	4_6	Control	211	12.246	1.507	14.595	0.12056	0.351915	0.024112
E16-45	3_6	Control	201	11.545	0.951	13.6546	0.07608	0.25971	0.01902
OS94-54	3_10	AsymAD	204	11.663	0.901	13.826	0.07208	0.249144	0.01802
OS02-270	2_10	AsymAD	204	9.817	0.796	11.6376	0.06368	0.185271	0.01592
OS03-394	1_10	AsymAD	200	13.76	1.564	16.2618	0.12512	0.406936	0.025024
E05-54	1_11	AsymAD	205	12.529	5.421	14.8639	0.43368	1.28924	0.086736
E04-74	1_12	AsymAD	203	11.505	0.423	13.6282	0.03384	0.0922356	0.006768
E15-97	2_11	AsymAD	212	11.997	1.301	14.3091	0.10408	0.372324	0.02602
E05-184	2_12	AsymAD	214	11.877	1.519	14.1876	0.12152	0.43102	0.03038
E13-49	3_11	AsymAD	207	9.104	1.288	10.8172	0.10304	0.278651	0.02576
OS00-12	2_1	AD	207	9.493	1.633	11.2794	0.13064	0.368386	0.03266
E05-80	4_1	AD	203	12.491	1.093	14.7962	0.08744	0.258755	0.017488
OS03-300	4_2	AD	216	10.994	1.961	13.1528	0.15688	0.412683	0.031376
E04-76	2_2	AD	202	8.874	1.775	10.5036	0.142	0.372877	0.0355
E04-186	1_1	AD	203	12.896	2.977	15.2759	0.23816	0.727622	0.047632
E06-155	1_2	AD	216	11.802	1.819	14.1195	0.14552	0.410933	0.029104
E06-190	1_3	AD	204	11.334	2.846	13.4359	0.22768	0.611819	0.045536
E07-26	3_1	AD	202	11.813	0.794	13.9823	0.06352	0.222039	0.01588
E08-53	3_2	AD	208	11.105	2.073	13.2049	0.16584	0.547473	0.04146
E08-142	3_3	AD	200	9.953	3.883	11.7626	0.31064	0.913486	0.07766
E11-97	2_3	AD	209	10.309	3.178	12.2677	0.25424	0.779736	0.06356
E16-66	4_3	AD	220	13.656	1.112	16.3872	0.08896	0.291561	0.017792
OS02-66	2_8	PD	206	11.969	1.282	14.2105	0.10256	0.364356	0.02564
OS03-392	3_7	PD	201	10.856	1.14	12.8397	0.0912	0.292745	0.0228
OS03-395	3_8	PD	204	11.993	2.633	14.2172	0.21064	0.748675	0.05266
E07-60	2_9	PD	202	7.295	2.074	8.63463	0.16592	0.358164	0.04148
E09-136	4_8	PD	209	13.596	2.1	16.1792	0.168	0.543622	0.0336
E12-48	3_9	PD	209	10.788	1.061	12.8377	0.08488	0.272416	0.02122
OS-140327	1_9	PD	220	13.121	1.53	15.7452	0.1224	0.385442	0.02448
E15-132	4_9	PD	207	11.951	0.9	14.2	0.072	0.204479	0.0144
OS97-53	4_7	PD	206	13.896	3.711	16.4983	0.29688	0.979606	0.059376
OS99-05	1_7	PD	214	12.689	3.168	15.1576	0.25344	0.768308	0.050688
OS99-26	2_7	PD	210	11.312	0.913	13.4716	0.07304	0.245991	0.01826
OS01-70	1_8	PD	204	12.233	1.282	14.5017	0.10256	0.297458	0.020512
† TH, total homogenate in low salt buffer.
* Adjusted to expected yield were all TH protein pelleted, instead of 4 or 5 mg wet protein weight. Sample IDs 2_ and 3_ are normalized from 4 to 5 mg TH input for pellet, which was the volume used for sample IDs 1_ and 4_.
Assuming the wet tissue volume of brain tissue is approximately 1.1 grams per cubic centimeter

## Sheet: Table S3
Table S3. Protein bands quantification of insoluble tau and U1-70K
CaseID	RAWfileID	Grouping	Insoluble/tau	Insoluble/U1-70K
A86-46	3_4	Control	10.23	0.21
A87-50	4_4	Control	14.51	0.09
A93-03	2_4	Control	1.99	1.43
OS99-08	3_5	Control	13.04	2.39
OS00-23	2_5	Control	1.24	2.77
OS02-35	1_4	Control	2.63	1.41
OS03-299	2_6	Control	1.34	1.99
E08-101	1_5	Control	1.28	0.32
E08-137	1_6	Control	1.03	1.44
E10-142	4_5	Control	7.17	4.6
E13-27	4_6	Control	9.97	5.96
E16-45	3_6	Control	10.02	0.22
OS94-54	3_10	AsymAD	21.02	57.64
OS02-270	2_10	AsymAD	3.07	41.19
OS03-394	1_10	AsymAD	2.21	5.07
E05-54	1_11	AsymAD	0.51	0.03
E04-74	1_12	AsymAD	2.64	15.97
E15-97	2_11	AsymAD	1.41	163.94
E05-184	2_12	AsymAD	2.08	8.51
E13-49	3_11	AsymAD	8.17	5.89
OS00-12	2_1	AD	1791.57	106.28
E05-80	4_1	AD	474.07	46.29
OS03-300	4_2	AD	2362.03	52.3
E04-76	2_2	AD	15.19	90.31
E04-186	1_1	AD	1667.58	7.81
E06-155	1_2	AD	1176.55	58.78
E06-190	1_3	AD	333.33	16.17
E07-26	3_1	AD	417.13	37.25
E08-53	3_2	AD	2120.32	13.14
E08-142	3_3	AD	1075.85	4.77
E11-97	2_3	AD	234.48	110.96
E16-66	4_3	AD	1225.11	71.53
OS02-66	2_8	PD	3.09	37.71
OS03-392	3_7	PD	8.99	1.05
OS03-395	3_8	PD	3.25	0.69
E07-60	2_9	PD	1.46	0.73
E09-136	4_8	PD	7.71	0.51
E12-48	3_9	PD	6.44	0.79
OS-140327	1_9	PD	1.85	1.7
E15-132	4_9	PD	4.54	3.73
OS97-53	4_7	PD	5.97	1.32
OS99-05	1_7	PD	1.55	0.15
OS99-26	2_7	PD	1.22	6.4
OS01-70	1_8	PD	1.92	2.71

## Sheet: Table S4
Table S4. Correlation of pT231-tau/U1-70K quantification beween western blot and PRM
	CaseID	RAWfileID	Grouping	MAPTpT231	SNRNP70	PRM.MAPT.VAVVRpTPPK	PRM.SNRNP70	Color
1	A86-46	3_4	Control	3.35473	-2.25154	19.3643	18.1062	#CF629F
2	A87-50	4_4	Control	3.85898	-3.47393	19.3511	18.5464	#CF629F
3	A93-03	2_4	Control	0.992768	0.516015	19.5761	18.6959	#CF629F
4	OS99-08	3_5	Control	3.70487	1.25701	19.7845	18.744	#CF629F
5	OS00-23	2_5	Control	0.31034	1.46989	19.5826	19.3094	#CF629F
6	OS02-35	1_4	Control	1.39506	0.495695	19.553	18.9216	#CF629F
7	OS03-299	2_6	Control	0.422233	0.992768	17.9098	19.4449	#CF629F
8	E08-101	1_5	Control	0.356144	-1.64386	18.1815	19.3676	#CF629F
9	E08-137	1_6	Control	0.0426443	0.526069	18.7143	18.9684	#CF629F
10	E10-142	4_5	Control	2.84197	2.20163	19.8099	17.6721	#CF629F
11	E13-27	4_6	Control	3.31759	2.57531	18.4487	18.77	#CF629F
12	E16-45	3_6	Control	3.32481	-2.18442	20.2868	18.8738	#CF629F
13	OS94-54	3_10	AsymAD	4.39369	5.849	21.1756	21.2515	#00BEE7
14	OS02-270	2_10	AsymAD	1.61824	5.36422	21.3867	20.2023	#00BEE7
15	OS03-394	1_10	AsymAD	1.14405	2.34199	21.0272	19.9218	#00BEE7
16	E05-54	1_11	AsymAD	-0.971431	-5.05889	17.3691	18.3046	#00BEE7
17	E04-74	1_12	AsymAD	1.40054	3.99729	22.1565	22.886	#00BEE7
18	E15-97	2_11	AsymAD	0.495695	7.35702	18.6308	21.7416	#00BEE7
19	E05-184	2_12	AsymAD	1.05658	3.08916	20.4198	19.7171	#00BEE7
20	E13-49	3_11	AsymAD	3.03034	2.55827	19.4863	19.0473	#00BEE7
21	OS00-12	2_1	AD	10.807	6.73173	29.7427	22.386	#58AA66
22	E05-80	4_1	AD	8.88896	5.53263	24.772	21.3841	#58AA66
23	OS03-300	4_2	AD	11.2058	5.70874	28.5188	22.739	#58AA66
24	E04-76	2_2	AD	3.92505	6.49681	21.0246	21.8967	#58AA66
25	E04-186	1_1	AD	10.7035	2.96532	28.0171	22.1167	#58AA66
26	E06-155	1_2	AD	10.2003	5.87725	28.3305	23.0072	#58AA66
27	E06-190	1_3	AD	8.38081	4.01525	26.2207	21.0792	#58AA66
28	E07-26	3_1	AD	8.70435	5.21917	24.3999	22.0764	#58AA66
29	E08-53	3_2	AD	11.0501	3.71589	28.224	21.6058	#58AA66
30	E08-142	3_3	AD	10.0713	2.25399	26.9946	19.8267	#58AA66
31	E11-97	2_3	AD	7.87332	6.7939	25.3637	21.7034	#58AA66
32	E16-66	4_3	AD	10.2587	6.16048	27.3779	22.7011	#58AA66
33	OS02-66	2_8	PD	1.62761	5.23688	18.8243	19.8665	#F25E28
34	OS03-392	3_7	PD	3.16832	0.0703893	22.2731	19.8179	#F25E28
35	OS03-395	3_8	PD	1.70044	-0.535332	19.156	17.2748	#F25E28
36	E07-60	2_9	PD	0.545968	-0.454032	20.97	18.0188	#F25E28
37	E09-136	4_8	PD	2.94673	-0.971431	17.987	18.5428	#F25E28
38	E12-48	3_9	PD	2.68706	-0.340075	19.1152	18.3203	#F25E28
39	OS-140327	1_9	PD	0.887525	0.765535	19.3145	18.6721	#F25E28
40	E15-132	4_9	PD	2.18269	1.89918	17.678	19.0622	#F25E28
41	OS97-53	4_7	PD	2.57773	0.400538	18.5914	18.902	#F25E28
42	OS99-05	1_7	PD	0.632268	-2.73697	20.0347	17.8854	#F25E28
43	OS99-26	2_7	PD	0.286881	2.67807	21.1331	18.9968	#F25E28
44	OS01-70	1_8	PD	0.941106	1.43829	19.8361	18.9289	#F25E28

## Sheet: Table S5
Table S5. Raw PRM quantified peptide peak area before normalization
Replicate Name	File Name	Protein Name	Protein Accession	Protein Gene	Peptide Modified Sequence	Precursor Ion Formula	Precursor Ion Name	Precursor Mz	Average Measured Retention Time	Total Area
Chromatograms	FinalList2_1.raw	sp|P49588|SYAC_HUMAN	P49588	AARS	LVSVLQNK	C40H73N11O12[M+2H]	LVSVLQNK(+H2)	450.779	57.05	9893109
GPS01	GPS01_2.raw	sp|P49588|SYAC_HUMAN	P49588	AARS	LVSVLQNK	C40H73N11O12[M+2H]	LVSVLQNK(+H2)	450.779	57.05	18073086
GPS02	GPS02_2.raw	sp|P49588|SYAC_HUMAN	P49588	AARS	LVSVLQNK	C40H73N11O12[M+2H]	LVSVLQNK(+H2)	450.779	57.05	12587338
GPS03	GPS03_2.raw	sp|P49588|SYAC_HUMAN	P49588	AARS	LVSVLQNK	C40H73N11O12[M+2H]	LVSVLQNK(+H2)	450.779	57.05	14785119
GPS04	GPS04_2.raw	sp|P49588|SYAC_HUMAN	P49588	AARS	LVSVLQNK	C40H73N11O12[M+2H]	LVSVLQNK(+H2)	450.779	57.05	12173728
GPS05	GPS_05_02.raw	sp|P49588|SYAC_HUMAN	P49588	AARS	LVSVLQNK	C40H73N11O12[M+2H]	LVSVLQNK(+H2)	450.779	57.05	8894542
GPS06	GPS_06_02.raw	sp|P49588|SYAC_HUMAN	P49588	AARS	LVSVLQNK	C40H73N11O12[M+2H]	LVSVLQNK(+H2)	450.779	57.05	6419896
1_1	1_1_02.raw	sp|P49588|SYAC_HUMAN	P49588	AARS	LVSVLQNK	C40H73N11O12[M+2H]	LVSVLQNK(+H2)	450.779	57.05	20661644
1_2	1_2_02.raw	sp|P49588|SYAC_HUMAN	P49588	AARS	LVSVLQNK	C40H73N11O12[M+2H]	LVSVLQNK(+H2)	450.779	57.05	22405490
1_3	1_3_02.raw	sp|P49588|SYAC_HUMAN	P49588	AARS	LVSVLQNK	C40H73N11O12[M+2H]	LVSVLQNK(+H2)	450.779	57.05	21093090
2_1	2_1_02.raw	sp|P49588|SYAC_HUMAN	P49588	AARS	LVSVLQNK	C40H73N11O12[M+2H]	LVSVLQNK(+H2)	450.779	57.05	9006894
2_2	2_2_02.raw	sp|P49588|SYAC_HUMAN	P49588	AARS	LVSVLQNK	C40H73N11O12[M+2H]	LVSVLQNK(+H2)	450.779	57.05	12232274
2_3	2_3_02.raw	sp|P49588|SYAC_HUMAN	P49588	AARS	LVSVLQNK	C40H73N11O12[M+2H]	LVSVLQNK(+H2)	450.779	57.05	20916968
3_1	3_1_02.raw	sp|P49588|SYAC_HUMAN	P49588	AARS	LVSVLQNK	C40H73N11O12[M+2H]	LVSVLQNK(+H2)	450.779	57.05	6049128
3_2	3_2_02.raw	sp|P49588|SYAC_HUMAN	P49588	AARS	LVSVLQNK	C40H73N11O12[M+2H]	LVSVLQNK(+H2)	450.779	57.05	11772264
3_3	3_3_02.raw	sp|P49588|SYAC_HUMAN	P49588	AARS	LVSVLQNK	C40H73N11O12[M+2H]	LVSVLQNK(+H2)	450.779	57.05	14236571
4_1	4_1_02.raw	sp|P49588|SYAC_HUMAN	P49588	AARS	LVSVLQNK	C40H73N11O12[M+2H]	LVSVLQNK(+H2)	450.779	57.05	10551790
4_2	4_2_02.raw	sp|P49588|SYAC_HUMAN	P49588	AARS	LVSVLQNK	C40H73N11O12[M+2H]	LVSVLQNK(+H2)	450.779	57.05	8627129
4_3	4_3_02.raw	sp|P49588|SYAC_HUMAN	P49588	AARS	LVSVLQNK	C40H73N11O12[M+2H]	LVSVLQNK(+H2)	450.779	57.05	7106311
1_4	1_4_02.raw	sp|P49588|SYAC_HUMAN	P49588	AARS	LVSVLQNK	C40H73N11O12[M+2H]	LVSVLQNK(+H2)	450.779	57.05	4095810
1_5	1_5_02.raw	sp|P49588|SYAC_HUMAN	P49588	AARS	LVSVLQNK	C40H73N11O12[M+2H]	LVSVLQNK(+H2)	450.779	57.05	25588494
1_6	1_6_02.raw	sp|P49588|SYAC_HUMAN	P49588	AARS	LVSVLQNK	C40H73N11O12[M+2H]	LVSVLQNK(+H2)	450.779	57.05	31735050
2_4	2_4_02.raw	sp|P49588|SYAC_HUMAN	P49588	AARS	LVSVLQNK	C40H73N11O12[M+2H]	LVSVLQNK(+H2)	450.779	57.05	30083100
2_5	2_5_02.raw	sp|P49588|SYAC_HUMAN	P49588	AARS	LVSVLQNK	C40H73N11O12[M+2H]	LVSVLQNK(+H2)	450.779	57.05	38445768
2_6	2_6_02.raw	sp|P49588|SYAC_HUMAN	P49588	AARS	LVSVLQNK	C40H73N11O12[M+2H]	LVSVLQNK(+H2)	450.779	57.05	33468244
3_4	3_4_02.raw	sp|P49588|SYAC_HUMAN	P49588	AARS	LVSVLQNK	C40H73N11O12[M+2H]	LVSVLQNK(+H2)	450.779	57.05	15966448
3_5	3_5_02.raw	sp|P49588|SYAC_HUMAN	P49588	AARS	LVSVLQNK	C40H73N11O12[M+2H]	LVSVLQNK(+H2)	450.779	57.05	15199444
3_6	3_6_02.raw	sp|P49588|SYAC_HUMAN	P49588	AARS	LVSVLQNK	C40H73N11O12[M+2H]	LVSVLQNK(+H2)	450.779	57.05	6707191
4_4	4_4_02.raw	sp|P49588|SYAC_HUMAN	P49588	AARS	LVSVLQNK	C40H73N11O12[M+2H]	LVSVLQNK(+H2)	450.779	57.05	15357980
4_5	4_5_02.raw	sp|P49588|SYAC_HUMAN	P49588	AARS	LVSVLQNK	C40H73N11O12[M+2H]	LVSVLQNK(+H2)	450.779	57.05	4636105
4_6	4_6_02.raw	sp|P49588|SYAC_HUMAN	P49588	AARS	LVSVLQNK	C40H73N11O12[M+2H]	LVSVLQNK(+H2)	450.779	57.05	9198671
1_7	1_7_02.raw	sp|P49588|SYAC_HUMAN	P49588	AARS	LVSVLQNK	C40H73N11O12[M+2H]	LVSVLQNK(+H2)	450.779	57.05	8146288
1_8	1_8_02.raw	sp|P49588|SYAC_HUMAN	P49588	AARS	LVSVLQNK	C40H73N11O12[M+2H]	LVSVLQNK(+H2)	450.779	57.05	5337226
1_9	1_9_02.raw	sp|P49588|SYAC_HUMAN	P49588	AARS	LVSVLQNK	C40H73N11O12[M+2H]	LVSVLQNK(+H2)	450.779	57.05	19753972
2_7	2_7_02.raw	sp|P49588|SYAC_HUMAN	P49588	AARS	LVSVLQNK	C40H73N11O12[M+2H]	LVSVLQNK(+H2)	450.779	57.05	6188263
2_8	2_8_02.raw	sp|P49588|SYAC_HUMAN	P49588	AARS	LVSVLQNK	C40H73N11O12[M+2H]	LVSVLQNK(+H2)	450.779	57.05	23725772
2_9	2_9_02_171217160937.raw	sp|P49588|SYAC_HUMAN	P49588	AARS	LVSVLQNK	C40H73N11O12[M+2H]	LVSVLQNK(+H2)	450.779	57.05	29276308
3_7	3_7_02.raw	sp|P49588|SYAC_HUMAN	P49588	AARS	LVSVLQNK	C40H73N11O12[M+2H]	LVSVLQNK(+H2)	450.779	57.05	3425340
3_8	3_8_02.raw	sp|P49588|SYAC_HUMAN	P49588	AARS	LVSVLQNK	C40H73N11O12[M+2H]	LVSVLQNK(+H2)	450.779	57.05	16799204
3_9	3_9_02.raw	sp|P49588|SYAC_HUMAN	P49588	AARS	LVSVLQNK	C40H73N11O12[M+2H]	LVSVLQNK(+H2)	450.779	57.05	18001910
4_7	4_7_02.raw	sp|P49588|SYAC_HUMAN	P49588	AARS	LVSVLQNK	C40H73N11O12[M+2H]	LVSVLQNK(+H2)	450.779	57.05	15122646
4_8	4_8_02.raw	sp|P49588|SYAC_HUMAN	P49588	AARS	LVSVLQNK	C40H73N11O12[M+2H]	LVSVLQNK(+H2)	450.779	57.05	16255
4_9	4_9_02.raw	sp|P49588|SYAC_HUMAN	P49588	AARS	LVSVLQNK	C40H73N11O12[M+2H]	LVSVLQNK(+H2)	450.779	57.05	6697624
1_10	1_10_02.raw	sp|P49588|SYAC_HUMAN	P49588	AARS	LVSVLQNK	C40H73N11O12[M+2H]	LVSVLQNK(+H2)	450.779	57.05	19568370
1_11	1_11_02.raw	sp|P49588|SYAC_HUMAN	P49588	AARS	LVSVLQNK	C40H73N11O12[M+2H]	LVSVLQNK(+H2)	450.779	57.05	26984624
1_12	1_12_02.raw	sp|P49588|SYAC_HUMAN	P49588	AARS	LVSVLQNK	C40H73N11O12[M+2H]	LVSVLQNK(+H2)	450.779	57.05	5995931
2_10	2_10_02.raw	sp|P49588|SYAC_HUMAN	P49588	AARS	LVSVLQNK	C40H73N11O12[M+2H]	LVSVLQNK(+H2)	450.779	57.05	8240763
2_11	2_11_02.raw	sp|P49588|SYAC_HUMAN	P49588	AARS	LVSVLQNK	C40H73N11O12[M+2H]	LVSVLQNK(+H2)	450.779	57.05	10602339
2_12	2_12_02.raw	sp|P49588|SYAC_HUMAN	P49588	AARS	LVSVLQNK	C40H73N11O12[M+2H]	LVSVLQNK(+H2)	450.779	57.05	8005513
3_10	3_10_02.raw	sp|P49588|SYAC_HUMAN	P49588	AARS	LVSVLQNK	C40H73N11O12[M+2H]	LVSVLQNK(+H2)	450.779	57.05	3969405
3_11	3_11_02.raw	sp|P49588|SYAC_HUMAN	P49588	AARS	LVSVLQNK	C40H73N11O12[M+2H]	LVSVLQNK(+H2)	450.779	57.05	8724995
Chromatograms	FinalList2_2.raw	sp|P49588|SYAC_HUMAN	P49588	AARS	IVAVTGAEAQK	C47H83N13O16[M+2H]	IVAVTGAEAQK(+H2)	543.811	46.26	12093878
GPS01	GPS01_1.raw	sp|P49588|SYAC_HUMAN	P49588	AARS	IVAVTGAEAQK	C47H83N13O16[M+2H]	IVAVTGAEAQK(+H2)	543.811	46.26	32201860
GPS02	GPS02_1.raw	sp|P49588|SYAC_HUMAN	P49588	AARS	IVAVTGAEAQK	C47H83N13O16[M+2H]	IVAVTGAEAQK(+H2)	543.811	46.26	33920220
GPS03	GPS03_1.raw	sp|P49588|SYAC_HUMAN	P49588	AARS	IVAVTGAEAQK	C47H83N13O16[M+2H]	IVAVTGAEAQK(+H2)	543.811	46.26	20177330
GPS04	GPS04_1.raw	sp|P49588|SYAC_HUMAN	P49588	AARS	IVAVTGAEAQK	C47H83N13O16[M+2H]	IVAVTGAEAQK(+H2)	543.811	46.26	19013582
GPS05	GPS_05_01.raw	sp|P49588|SYAC_HUMAN	P49588	AARS	IVAVTGAEAQK	C47H83N13O16[M+2H]	IVAVTGAEAQK(+H2)	543.811	46.26	8491812
GPS06	GPS_06_01.raw	sp|P49588|SYAC_HUMAN	P49588	AARS	IVAVTGAEAQK	C47H83N13O16[M+2H]	IVAVTGAEAQK(+H2)	543.811	46.26	7364621
1_1	1_1_01.raw	sp|P49588|SYAC_HUMAN	P49588	AARS	IVAVTGAEAQK	C47H83N13O16[M+2H]	IVAVTGAEAQK(+H2)	543.811	46.26	39730632
1_2	1_2_01.raw	sp|P49588|SYAC_HUMAN	P49588	AARS	IVAVTGAEAQK	C47H83N13O16[M+2H]	IVAVTGAEAQK(+H2)	543.811	46.26	34684752
1_3	1_3_01.raw	sp|P49588|SYAC_HUMAN	P49588	AARS	IVAVTGAEAQK	C47H83N13O16[M+2H]	IVAVTGAEAQK(+H2)	543.811	46.26	31494086
2_1	2_1_01.raw	sp|P49588|SYAC_HUMAN	P49588	AARS	IVAVTGAEAQK	C47H83N13O16[M+2H]	IVAVTGAEAQK(+H2)	543.811	46.26	14132056
2_2	2_2_01.raw	sp|P49588|SYAC_HUMAN	P49588	AARS	IVAVTGAEAQK	C47H83N13O16[M+2H]	IVAVTGAEAQK(+H2)	543.811	46.26	19740388
2_3	2_3_01.raw	sp|P49588|SYAC_HUMAN	P49588	AARS	IVAVTGAEAQK	C47H83N13O16[M+2H]	IVAVTGAEAQK(+H2)	543.811	46.26	29472260
3_1	3_1_01.raw	sp|P49588|SYAC_HUMAN	P49588	AARS	IVAVTGAEAQK	C47H83N13O16[M+2H]	IVAVTGAEAQK(+H2)	543.811	46.26	9511457
3_2	3_2_01_171223210221.raw	sp|P49588|SYAC_HUMAN	P49588	AARS	IVAVTGAEAQK	C47H83N13O16[M+2H]	IVAVTGAEAQK(+H2)	543.811	46.26	19413240
3_3	3_3_01.raw	sp|P49588|SYAC_HUMAN	P49588	AARS	IVAVTGAEAQK	C47H83N13O16[M+2H]	IVAVTGAEAQK(+H2)	543.811	46.26	24883436
4_1	4_1_01.raw	sp|P49588|SYAC_HUMAN	P49588	AARS	IVAVTGAEAQK	C47H83N13O16[M+2H]	IVAVTGAEAQK(+H2)	543.811	46.26	3768854
4_2	4_2_01.raw	sp|P49588|SYAC_HUMAN	P49588	AARS	IVAVTGAEAQK	C47H83N13O16[M+2H]	IVAVTGAEAQK(+H2)	543.811	46.26	7271973
4_3	4_3_01.raw	sp|P49588|SYAC_HUMAN	P49588	AARS	IVAVTGAEAQK	C47H83N13O16[M+2H]	IVAVTGAEAQK(+H2)	543.811	46.26	8396554
1_4	1_4_01.raw	sp|P49588|SYAC_HUMAN	P49588	AARS	IVAVTGAEAQK	C47H83N13O16[M+2H]	IVAVTGAEAQK(+H2)	543.811	46.26	7073258
1_5	1_5_01.raw	sp|P49588|SYAC_HUMAN	P49588	AARS	IVAVTGAEAQK	C47H83N13O16[M+2H]	IVAVTGAEAQK(+H2)	543.811	46.26	37516440
1_6	1_6_01.raw	sp|P49588|SYAC_HUMAN	P49588	AARS	IVAVTGAEAQK	C47H83N13O16[M+2H]	IVAVTGAEAQK(+H2)	543.811	46.26	54985944
2_4	2_4_01.raw	sp|P49588|SYAC_HUMAN	P49588	AARS	IVAVTGAEAQK	C47H83N13O16[M+2H]	IVAVTGAEAQK(+H2)	543.811	46.26	41208672
2_5	2_5_01.raw	sp|P49588|SYAC_HUMAN	P49588	AARS	IVAVTGAEAQK	C47H83N13O16[M+2H]	IVAVTGAEAQK(+H2)	543.811	46.26	51853032
2_6	2_6_01.raw	sp|P49588|SYAC_HUMAN	P49588	AARS	IVAVTGAEAQK	C47H83N13O16[M+2H]	IVAVTGAEAQK(+H2)	543.811	46.26	49387112
3_4	3_4_01.raw	sp|P49588|SYAC_HUMAN	P49588	AARS	IVAVTGAEAQK	C47H83N13O16[M+2H]	IVAVTGAEAQK(+H2)	543.811	46.26	25624896
3_5	3_5_01.raw	sp|P49588|SYAC_HUMAN	P49588	AARS	IVAVTGAEAQK	C47H83N13O16[M+2H]	IVAVTGAEAQK(+H2)	543.811	46.26	24397380
3_6	3_6_01.raw	sp|P49588|SYAC_HUMAN	P49588	AARS	IVAVTGAEAQK	C47H83N13O16[M+2H]	IVAVTGAEAQK(+H2)	543.811	46.26	13510524
4_4	4_4_01.raw	sp|P49588|SYAC_HUMAN	P49588	AARS	IVAVTGAEAQK	C47H83N13O16[M+2H]	IVAVTGAEAQK(+H2)	543.811	46.26	18874414
4_5	4_5_01.raw	sp|P49588|SYAC_HUMAN	P49588	AARS	IVAVTGAEAQK	C47H83N13O16[M+2H]	IVAVTGAEAQK(+H2)	543.811	46.26	6337301
4_6	4_6_01.raw	sp|P49588|SYAC_HUMAN	P49588	AARS	IVAVTGAEAQK	C47H83N13O16[M+2H]	IVAVTGAEAQK(+H2)	543.811	46.26	9371305
1_7	1_7_01.raw	sp|P49588|SYAC_HUMAN	P49588	AARS	IVAVTGAEAQK	C47H83N13O16[M+2H]	IVAVTGAEAQK(+H2)	543.811	46.26	11694110
1_8	1_8_01_171211223541.raw	sp|P49588|SYAC_HUMAN	P49588	AARS	IVAVTGAEAQK	C47H83N13O16[M+2H]	IVAVTGAEAQK(+H2)	543.811	46.26	9317337
1_9	1_9_01.raw	sp|P49588|SYAC_HUMAN	P49588	AARS	IVAVTGAEAQK	C47H83N13O16[M+2H]	IVAVTGAEAQK(+H2)	543.811	46.26	28811664
2_7	2_7_01.raw	sp|P49588|SYAC_HUMAN	P49588	AARS	IVAVTGAEAQK	C47H83N13O16[M+2H]	IVAVTGAEAQK(+H2)	543.811	46.26	10372290
2_8	2_8_01.raw	sp|P49588|SYAC_HUMAN	P49588	AARS	IVAVTGAEAQK	C47H83N13O16[M+2H]	IVAVTGAEAQK(+H2)	543.811	46.26	35781140
2_9	2_9_01_171217123101.raw	sp|P49588|SYAC_HUMAN	P49588	AARS	IVAVTGAEAQK	C47H83N13O16[M+2H]	IVAVTGAEAQK(+H2)	543.811	46.26	40081284
3_7	3_7_01.raw	sp|P49588|SYAC_HUMAN	P49588	AARS	IVAVTGAEAQK	C47H83N13O16[M+2H]	IVAVTGAEAQK(+H2)	543.811	46.26	4635718
3_8	3_8_01.raw	sp|P49588|SYAC_HUMAN	P49588	AARS	IVAVTGAEAQK	C47H83N13O16[M+2H]	IVAVTGAEAQK(+H2)	543.811	46.26	23425740
3_9	3_9_01.raw	sp|P49588|SYAC_HUMAN	P49588	AARS	IVAVTGAEAQK	C47H83N13O16[M+2H]	IVAVTGAEAQK(+H2)	543.811	46.26	23266632
4_7	4_7_01.raw	sp|P49588|SYAC_HUMAN	P49588	AARS	IVAVTGAEAQK	C47H83N13O16[M+2H]	IVAVTGAEAQK(+H2)	543.811	46.26	23123192
4_8	4_8_01.raw	sp|P49588|SYAC_HUMAN	P49588	AARS	IVAVTGAEAQK	C47H83N13O16[M+2H]	IVAVTGAEAQK(+H2)	543.811	46.26	10173000
4_9	4_9_01.raw	sp|P49588|SYAC_HUMAN	P49588	AARS	IVAVTGAEAQK	C47H83N13O16[M+2H]	IVAVTGAEAQK(+H2)	543.811	46.26	7031966
1_10	1_10_01.raw	sp|P49588|SYAC_HUMAN	P49588	AARS	IVAVTGAEAQK	C47H83N13O16[M+2H]	IVAVTGAEAQK(+H2)	543.811	46.26	36206616
1_11	1_11_01.raw	sp|P49588|SYAC_HUMAN	P49588	AARS	IVAVTGAEAQK	C47H83N13O16[M+2H]	IVAVTGAEAQK(+H2)	543.811	46.26	30665984
1_12	1_12_01.raw	sp|P49588|SYAC_HUMAN	P49588	AARS	IVAVTGAEAQK	C47H83N13O16[M+2H]	IVAVTGAEAQK(+H2)	543.811	46.26	9096533
2_10	2_10_01.raw	sp|P49588|SYAC_HUMAN	P49588	AARS	IVAVTGAEAQK	C47H83N13O16[M+2H]	IVAVTGAEAQK(+H2)	543.811	46.26	13479107
2_11	2_11_01_171223040132.raw	sp|P49588|SYAC_HUMAN	P49588	AARS	IVAVTGAEAQK	C47H83N13O16[M+2H]	IVAVTGAEAQK(+H2)	543.811	46.26	14059271
2_12	2_12_01.raw	sp|P49588|SYAC_HUMAN	P49588	AARS	IVAVTGAEAQK	C47H83N13O16[M+2H]	IVAVTGAEAQK(+H2)	543.811	46.26	13251946
3_10	3_10_01.raw	sp|P49588|SYAC_HUMAN	P49588	AARS	IVAVTGAEAQK	C47H83N13O16[M+2H]	IVAVTGAEAQK(+H2)	543.811	46.26	8808272
3_11	3_11_01.raw	sp|P49588|SYAC_HUMAN	P49588	AARS	IVAVTGAEAQK	C47H83N13O16[M+2H]	IVAVTGAEAQK(+H2)	543.811	46.26	11312508
Chromatograms	FinalList2_1.raw	sp|P49588|SYAC_HUMAN	P49588	AARS	QFIDSNPNQPLVILEMESGASAK	C108H174N28O37S[M+3H]	QFIDSNPNQPLVILEMESGASAK(+H3)	830.084	113.36	2142784
GPS01	GPS01_1.raw	sp|P49588|SYAC_HUMAN	P49588	AARS	QFIDSNPNQPLVILEMESGASAK	C108H174N28O37S[M+3H]	QFIDSNPNQPLVILEMESGASAK(+H3)	830.084	113.36	3315059
GPS02	GPS02_1.raw	sp|P49588|SYAC_HUMAN	P49588	AARS	QFIDSNPNQPLVILEMESGASAK	C108H174N28O37S[M+3H]	QFIDSNPNQPLVILEMESGASAK(+H3)	830.084	113.36	2655277
GPS03	GPS03_1.raw	sp|P49588|SYAC_HUMAN	P49588	AARS	QFIDSNPNQPLVILEMESGASAK	C108H174N28O37S[M+3H]	QFIDSNPNQPLVILEMESGASAK(+H3)	830.084	113.36	1858162
GPS04	GPS04_1.raw	sp|P49588|SYAC_HUMAN	P49588	AARS	QFIDSNPNQPLVILEMESGASAK	C108H174N28O37S[M+3H]	QFIDSNPNQPLVILEMESGASAK(+H3)	830.084	113.36	2200307
GPS05	GPS_05_01.raw	sp|P49588|SYAC_HUMAN	P49588	AARS	QFIDSNPNQPLVILEMESGASAK	C108H174N28O37S[M+3H]	QFIDSNPNQPLVILEMESGASAK(+H3)	830.084	113.36	509310
GPS06	GPS_06_01.raw	sp|P49588|SYAC_HUMAN	P49588	AARS	QFIDSNPNQPLVILEMESGASAK	C108H174N28O37S[M+3H]	QFIDSNPNQPLVILEMESGASAK(+H3)	830.084	113.36	776612
1_1	1_1_01.raw	sp|P49588|SYAC_HUMAN	P49588	AARS	QFIDSNPNQPLVILEMESGASAK	C108H174N28O37S[M+3H]	QFIDSNPNQPLVILEMESGASAK(+H3)	830.084	113.36	2816083
1_2	1_2_01.raw	sp|P49588|SYAC_HUMAN	P49588	AARS	QFIDSNPNQPLVILEMESGASAK	C108H174N28O37S[M+3H]	QFIDSNPNQPLVILEMESGASAK(+H3)	830.084	113.36	3066961
1_3	1_3_01.raw	sp|P49588|SYAC_HUMAN	P49588	AARS	QFIDSNPNQPLVILEMESGASAK	C108H174N28O37S[M+3H]	QFIDSNPNQPLVILEMESGASAK(+H3)	830.084	113.36	3434983
2_1	2_1_01.raw	sp|P49588|SYAC_HUMAN	P49588	AARS	QFIDSNPNQPLVILEMESGASAK	C108H174N28O37S[M+3H]	QFIDSNPNQPLVILEMESGASAK(+H3)	830.084	113.36	1927022
2_2	2_2_01.raw	sp|P49588|SYAC_HUMAN	P49588	AARS	QFIDSNPNQPLVILEMESGASAK	C108H174N28O37S[M+3H]	QFIDSNPNQPLVILEMESGASAK(+H3)	830.084	113.36	2895389
2_3	2_3_01.raw	sp|P49588|SYAC_HUMAN	P49588	AARS	QFIDSNPNQPLVILEMESGASAK	C108H174N28O37S[M+3H]	QFIDSNPNQPLVILEMESGASAK(+H3)	830.084	113.36	6057941
3_1	3_1_01.raw	sp|P49588|SYAC_HUMAN	P49588	AARS	QFIDSNPNQPLVILEMESGASAK	C108H174N28O37S[M+3H]	QFIDSNPNQPLVILEMESGASAK(+H3)	830.084	113.36	607854
3_2	3_2_01_171223210221.raw	sp|P49588|SYAC_HUMAN	P49588	AARS	QFIDSNPNQPLVILEMESGASAK	C108H174N28O37S[M+3H]	QFIDSNPNQPLVILEMESGASAK(+H3)	830.084	113.36	1040243
3_3	3_3_01.raw	sp|P49588|SYAC_HUMAN	P49588	AARS	QFIDSNPNQPLVILEMESGASAK	C108H174N28O37S[M+3H]	QFIDSNPNQPLVILEMESGASAK(+H3)	830.084	113.36	1208388
4_1	4_1_01.raw	sp|P49588|SYAC_HUMAN	P49588	AARS	QFIDSNPNQPLVILEMESGASAK	C108H174N28O37S[M+3H]	QFIDSNPNQPLVILEMESGASAK(+H3)	830.084	113.36	145102
4_2	4_2_01.raw	sp|P49588|SYAC_HUMAN	P49588	AARS	QFIDSNPNQPLVILEMESGASAK	C108H174N28O37S[M+3H]	QFIDSNPNQPLVILEMESGASAK(+H3)	830.084	113.36	887391
4_3	4_3_01.raw	sp|P49588|SYAC_HUMAN	P49588	AARS	QFIDSNPNQPLVILEMESGASAK	C108H174N28O37S[M+3H]	QFIDSNPNQPLVILEMESGASAK(+H3)	830.084	113.36	1352536
1_4	1_4_01.raw	sp|P49588|SYAC_HUMAN	P49588	AARS	QFIDSNPNQPLVILEMESGASAK	C108H174N28O37S[M+3H]	QFIDSNPNQPLVILEMESGASAK(+H3)	830.084	113.36	599691
1_5	1_5_01.raw	sp|P49588|SYAC_HUMAN	P49588	AARS	QFIDSNPNQPLVILEMESGASAK	C108H174N28O37S[M+3H]	QFIDSNPNQPLVILEMESGASAK(+H3)	830.084	113.36	3085148
1_6	1_6_01.raw	sp|P49588|SYAC_HUMAN	P49588	AARS	QFIDSNPNQPLVILEMESGASAK	C108H174N28O37S[M+3H]	QFIDSNPNQPLVILEMESGASAK(+H3)	830.084	113.36	4269522
2_4	2_4_01.raw	sp|P49588|SYAC_HUMAN	P49588	AARS	QFIDSNPNQPLVILEMESGASAK	C108H174N28O37S[M+3H]	QFIDSNPNQPLVILEMESGASAK(+H3)	830.084	113.36	6968390
2_5	2_5_01.raw	sp|P49588|SYAC_HUMAN	P49588	AARS	QFIDSNPNQPLVILEMESGASAK	C108H174N28O37S[M+3H]	QFIDSNPNQPLVILEMESGASAK(+H3)	830.084	113.36	8042270
2_6	2_6_01.raw	sp|P49588|SYAC_HUMAN	P49588	AARS	QFIDSNPNQPLVILEMESGASAK	C108H174N28O37S[M+3H]	QFIDSNPNQPLVILEMESGASAK(+H3)	830.084	113.36	6360223
3_4	3_4_01.raw	sp|P49588|SYAC_HUMAN	P49588	AARS	QFIDSNPNQPLVILEMESGASAK	C108H174N28O37S[M+3H]	QFIDSNPNQPLVILEMESGASAK(+H3)	830.084	113.36	1104280
3_5	3_5_01.raw	sp|P49588|SYAC_HUMAN	P49588	AARS	QFIDSNPNQPLVILEMESGASAK	C108H174N28O37S[M+3H]	QFIDSNPNQPLVILEMESGASAK(+H3)	830.084	113.36	1723311
3_6	3_6_01.raw	sp|P49588|SYAC_HUMAN	P49588	AARS	QFIDSNPNQPLVILEMESGASAK	C108H174N28O37S[M+3H]	QFIDSNPNQPLVILEMESGASAK(+H3)	830.084	113.36	1031038
4_4	4_4_01.raw	sp|P49588|SYAC_HUMAN	P49588	AARS	QFIDSNPNQPLVILEMESGASAK	C108H174N28O37S[M+3H]	QFIDSNPNQPLVILEMESGASAK(+H3)	830.084	113.36	3046422
4_5	4_5_01.raw	sp|P49588|SYAC_HUMAN	P49588	AARS	QFIDSNPNQPLVILEMESGASAK	C108H174N28O37S[M+3H]	QFIDSNPNQPLVILEMESGASAK(+H3)	830.084	113.36	1113684
4_6	4_6_01.raw	sp|P49588|SYAC_HUMAN	P49588	AARS	QFIDSNPNQPLVILEMESGASAK	C108H174N28O37S[M+3H]	QFIDSNPNQPLVILEMESGASAK(+H3)	830.084	113.36	1411194
1_7	1_7_01.raw	sp|P49588|SYAC_HUMAN	P49588	AARS	QFIDSNPNQPLVILEMESGASAK	C108H174N28O37S[M+3H]	QFIDSNPNQPLVILEMESGASAK(+H3)	830.084	113.36	840175
1_8	1_8_01_171211223541.raw	sp|P49588|SYAC_HUMAN	P49588	AARS	QFIDSNPNQPLVILEMESGASAK	C108H174N28O37S[M+3H]	QFIDSNPNQPLVILEMESGASAK(+H3)	830.084	113.36	465847
1_9	1_9_01.raw	sp|P49588|SYAC_HUMAN	P49588	AARS	QFIDSNPNQPLVILEMESGASAK	C108H174N28O37S[M+3H]	QFIDSNPNQPLVILEMESGASAK(+H3)	830.084	113.36	2198841
2_7	2_7_01.raw	sp|P49588|SYAC_HUMAN	P49588	AARS	QFIDSNPNQPLVILEMESGASAK	C108H174N28O37S[M+3H]	QFIDSNPNQPLVILEMESGASAK(+H3)	830.084	113.36	1309525
2_8	2_8_01.raw	sp|P49588|SYAC_HUMAN	P49588	AARS	QFIDSNPNQPLVILEMESGASAK	C108H174N28O37S[M+3H]	QFIDSNPNQPLVILEMESGASAK(+H3)	830.084	113.36	4411203
2_9	2_9_01_171217123101.raw	sp|P49588|SYAC_HUMAN	P49588	AARS	QFIDSNPNQPLVILEMESGASAK	C108H174N28O37S[M+3H]	QFIDSNPNQPLVILEMESGASAK(+H3)	830.084	113.36	4441294
3_7	3_7_01.raw	sp|P49588|SYAC_HUMAN	P49588	AARS	QFIDSNPNQPLVILEMESGASAK	C108H174N28O37S[M+3H]	QFIDSNPNQPLVILEMESGASAK(+H3)	830.084	113.36	366452
3_8	3_8_01.raw	sp|P49588|SYAC_HUMAN	P49588	AARS	QFIDSNPNQPLVILEMESGASAK	C108H174N28O37S[M+3H]	QFIDSNPNQPLVILEMESGASAK(+H3)	830.084	113.36	2323201
3_9	3_9_01.raw	sp|P49588|SYAC_HUMAN	P49588	AARS	QFIDSNPNQPLVILEMESGASAK	C108H174N28O37S[M+3H]	QFIDSNPNQPLVILEMESGASAK(+H3)	830.084	113.36	2637448
4_7	4_7_01.raw	sp|P49588|SYAC_HUMAN	P49588	AARS	QFIDSNPNQPLVILEMESGASAK	C108H174N28O37S[M+3H]	QFIDSNPNQPLVILEMESGASAK(+H3)	830.084	113.36	2614525
4_8	4_8_01.raw	sp|P49588|SYAC_HUMAN	P49588	AARS	QFIDSNPNQPLVILEMESGASAK	C108H174N28O37S[M+3H]	QFIDSNPNQPLVILEMESGASAK(+H3)	830.084	113.36	1209883
4_9	4_9_01.raw	sp|P49588|SYAC_HUMAN	P49588	AARS	QFIDSNPNQPLVILEMESGASAK	C108H174N28O37S[M+3H]	QFIDSNPNQPLVILEMESGASAK(+H3)	830.084	113.36	885947
1_10	1_10_01.raw	sp|P49588|SYAC_HUMAN	P49588	AARS	QFIDSNPNQPLVILEMESGASAK	C108H174N28O37S[M+3H]	QFIDSNPNQPLVILEMESGASAK(+H3)	830.084	113.36	2696497
1_11	1_11_01.raw	sp|P49588|SYAC_HUMAN	P49588	AARS	QFIDSNPNQPLVILEMESGASAK	C108H174N28O37S[M+3H]	QFIDSNPNQPLVILEMESGASAK(+H3)	830.084	113.36	1907690
1_12	1_12_01.raw	sp|P49588|SYAC_HUMAN	P49588	AARS	QFIDSNPNQPLVILEMESGASAK	C108H174N28O37S[M+3H]	QFIDSNPNQPLVILEMESGASAK(+H3)	830.084	113.36	637779
2_10	2_10_01.raw	sp|P49588|SYAC_HUMAN	P49588	AARS	QFIDSNPNQPLVILEMESGASAK	C108H174N28O37S[M+3H]	QFIDSNPNQPLVILEMESGASAK(+H3)	830.084	113.36	2033433
2_11	2_11_01_171223040132.raw	sp|P49588|SYAC_HUMAN	P49588	AARS	QFIDSNPNQPLVILEMESGASAK	C108H174N28O37S[M+3H]	QFIDSNPNQPLVILEMESGASAK(+H3)	830.084	113.36	1027694
2_12	2_12_01.raw	sp|P49588|SYAC_HUMAN	P49588	AARS	QFIDSNPNQPLVILEMESGASAK	C108H174N28O37S[M+3H]	QFIDSNPNQPLVILEMESGASAK(+H3)	830.084	113.36	717969
3_10	3_10_01.raw	sp|P49588|SYAC_HUMAN	P49588	AARS	QFIDSNPNQPLVILEMESGASAK	C108H174N28O37S[M+3H]	QFIDSNPNQPLVILEMESGASAK(+H3)	830.084	113.36	738322
3_11	3_11_01.raw	sp|P49588|SYAC_HUMAN	P49588	AARS	QFIDSNPNQPLVILEMESGASAK	C108H174N28O37S[M+3H]	QFIDSNPNQPLVILEMESGASAK(+H3)	830.084	113.36	970273
Chromatograms	FinalList2_1.raw	sp|Q8NE71|ABCF1_HUMAN	Q8NE71	ABCF1	AANAAENDFSVSQAEMSSR	C79H125N25O33S[M+2H]	AANAAENDFSVSQAEMSSR(+H2)	992.937	65.84	394959
GPS01	GPS01_1.raw	sp|Q8NE71|ABCF1_HUMAN	Q8NE71	ABCF1	AANAAENDFSVSQAEMSSR	C79H125N25O33S[M+2H]	AANAAENDFSVSQAEMSSR(+H2)	992.937	65.84	604599
GPS02	GPS02_1.raw	sp|Q8NE71|ABCF1_HUMAN	Q8NE71	ABCF1	AANAAENDFSVSQAEMSSR	C79H125N25O33S[M+2H]	AANAAENDFSVSQAEMSSR(+H2)	992.937	65.84	562880
GPS03	GPS03_1.raw	sp|Q8NE71|ABCF1_HUMAN	Q8NE71	ABCF1	AANAAENDFSVSQAEMSSR	C79H125N25O33S[M+2H]	AANAAENDFSVSQAEMSSR(+H2)	992.937	65.84	458208
GPS04	GPS04_1.raw	sp|Q8NE71|ABCF1_HUMAN	Q8NE71	ABCF1	AANAAENDFSVSQAEMSSR	C79H125N25O33S[M+2H]	AANAAENDFSVSQAEMSSR(+H2)	992.937	65.84	417425
GPS05	GPS_05_01.raw	sp|Q8NE71|ABCF1_HUMAN	Q8NE71	ABCF1	AANAAENDFSVSQAEMSSR	C79H125N25O33S[M+2H]	AANAAENDFSVSQAEMSSR(+H2)	992.937	65.84	273420
GPS06	GPS_06_01.raw	sp|Q8NE71|ABCF1_HUMAN	Q8NE71	ABCF1	AANAAENDFSVSQAEMSSR	C79H125N25O33S[M+2H]	AANAAENDFSVSQAEMSSR(+H2)	992.937	65.84	177003
1_1	1_1_01.raw	sp|Q8NE71|ABCF1_HUMAN	Q8NE71	ABCF1	AANAAENDFSVSQAEMSSR	C79H125N25O33S[M+2H]	AANAAENDFSVSQAEMSSR(+H2)	992.937	65.84	423570
1_2	1_2_01.raw	sp|Q8NE71|ABCF1_HUMAN	Q8NE71	ABCF1	AANAAENDFSVSQAEMSSR	C79H125N25O33S[M+2H]	AANAAENDFSVSQAEMSSR(+H2)	992.937	65.84	824146
1_3	1_3_01.raw	sp|Q8NE71|ABCF1_HUMAN	Q8NE71	ABCF1	AANAAENDFSVSQAEMSSR	C79H125N25O33S[M+2H]	AANAAENDFSVSQAEMSSR(+H2)	992.937	65.84	595554
2_1	2_1_01.raw	sp|Q8NE71|ABCF1_HUMAN	Q8NE71	ABCF1	AANAAENDFSVSQAEMSSR	C79H125N25O33S[M+2H]	AANAAENDFSVSQAEMSSR(+H2)	992.937	65.84	95855
2_2	2_2_01.raw	sp|Q8NE71|ABCF1_HUMAN	Q8NE71	ABCF1	AANAAENDFSVSQAEMSSR	C79H125N25O33S[M+2H]	AANAAENDFSVSQAEMSSR(+H2)	992.937	65.84	314470
2_3	2_3_01.raw	sp|Q8NE71|ABCF1_HUMAN	Q8NE71	ABCF1	AANAAENDFSVSQAEMSSR	C79H125N25O33S[M+2H]	AANAAENDFSVSQAEMSSR(+H2)	992.937	65.84	818092
3_1	3_1_01.raw	sp|Q8NE71|ABCF1_HUMAN	Q8NE71	ABCF1	AANAAENDFSVSQAEMSSR	C79H125N25O33S[M+2H]	AANAAENDFSVSQAEMSSR(+H2)	992.937	65.84	119416
3_2	3_2_01_171223210221.raw	sp|Q8NE71|ABCF1_HUMAN	Q8NE71	ABCF1	AANAAENDFSVSQAEMSSR	C79H125N25O33S[M+2H]	AANAAENDFSVSQAEMSSR(+H2)	992.937	65.84	209328
3_3	3_3_01.raw	sp|Q8NE71|ABCF1_HUMAN	Q8NE71	ABCF1	AANAAENDFSVSQAEMSSR	C79H125N25O33S[M+2H]	AANAAENDFSVSQAEMSSR(+H2)	992.937	65.84	177298
4_1	4_1_01.raw	sp|Q8NE71|ABCF1_HUMAN	Q8NE71	ABCF1	AANAAENDFSVSQAEMSSR	C79H125N25O33S[M+2H]	AANAAENDFSVSQAEMSSR(+H2)	992.937	65.84	0
4_2	4_2_01.raw	sp|Q8NE71|ABCF1_HUMAN	Q8NE71	ABCF1	AANAAENDFSVSQAEMSSR	C79H125N25O33S[M+2H]	AANAAENDFSVSQAEMSSR(+H2)	992.937	65.84	31120
4_3	4_3_01.raw	sp|Q8NE71|ABCF1_HUMAN	Q8NE71	ABCF1	AANAAENDFSVSQAEMSSR	C79H125N25O33S[M+2H]	AANAAENDFSVSQAEMSSR(+H2)	992.937	65.84	127221
1_4	1_4_01.raw	sp|Q8NE71|ABCF1_HUMAN	Q8NE71	ABCF1	AANAAENDFSVSQAEMSSR	C79H125N25O33S[M+2H]	AANAAENDFSVSQAEMSSR(+H2)	992.937	65.84	336952
1_5	1_5_01.raw	sp|Q8NE71|ABCF1_HUMAN	Q8NE71	ABCF1	AANAAENDFSVSQAEMSSR	C79H125N25O33S[M+2H]	AANAAENDFSVSQAEMSSR(+H2)	992.937	65.84	277086
1_6	1_6_01.raw	sp|Q8NE71|ABCF1_HUMAN	Q8NE71	ABCF1	AANAAENDFSVSQAEMSSR	C79H125N25O33S[M+2H]	AANAAENDFSVSQAEMSSR(+H2)	992.937	65.84	1018206
2_4	2_4_01.raw	sp|Q8NE71|ABCF1_HUMAN	Q8NE71	ABCF1	AANAAENDFSVSQAEMSSR	C79H125N25O33S[M+2H]	AANAAENDFSVSQAEMSSR(+H2)	992.937	65.84	911663
2_5	2_5_01.raw	sp|Q8NE71|ABCF1_HUMAN	Q8NE71	ABCF1	AANAAENDFSVSQAEMSSR	C79H125N25O33S[M+2H]	AANAAENDFSVSQAEMSSR(+H2)	992.937	65.84	637893
2_6	2_6_01.raw	sp|Q8NE71|ABCF1_HUMAN	Q8NE71	ABCF1	AANAAENDFSVSQAEMSSR	C79H125N25O33S[M+2H]	AANAAENDFSVSQAEMSSR(+H2)	992.937	65.84	541594
3_4	3_4_01.raw	sp|Q8NE71|ABCF1_HUMAN	Q8NE71	ABCF1	AANAAENDFSVSQAEMSSR	C79H125N25O33S[M+2H]	AANAAENDFSVSQAEMSSR(+H2)	992.937	65.84	198300
3_5	3_5_01.raw	sp|Q8NE71|ABCF1_HUMAN	Q8NE71	ABCF1	AANAAENDFSVSQAEMSSR	C79H125N25O33S[M+2H]	AANAAENDFSVSQAEMSSR(+H2)	992.937	65.84	441214
3_6	3_6_01.raw	sp|Q8NE71|ABCF1_HUMAN	Q8NE71	ABCF1	AANAAENDFSVSQAEMSSR	C79H125N25O33S[M+2H]	AANAAENDFSVSQAEMSSR(+H2)	992.937	65.84	150397
4_4	4_4_01.raw	sp|Q8NE71|ABCF1_HUMAN	Q8NE71	ABCF1	AANAAENDFSVSQAEMSSR	C79H125N25O33S[M+2H]	AANAAENDFSVSQAEMSSR(+H2)	992.937	65.84	321680
4_5	4_5_01.raw	sp|Q8NE71|ABCF1_HUMAN	Q8NE71	ABCF1	AANAAENDFSVSQAEMSSR	C79H125N25O33S[M+2H]	AANAAENDFSVSQAEMSSR(+H2)	992.937	65.84	127931
4_6	4_6_01.raw	sp|Q8NE71|ABCF1_HUMAN	Q8NE71	ABCF1	AANAAENDFSVSQAEMSSR	C79H125N25O33S[M+2H]	AANAAENDFSVSQAEMSSR(+H2)	992.937	65.84	109210
1_7	1_7_01.raw	sp|Q8NE71|ABCF1_HUMAN	Q8NE71	ABCF1	AANAAENDFSVSQAEMSSR	C79H125N25O33S[M+2H]	AANAAENDFSVSQAEMSSR(+H2)	992.937	65.84	346548
1_8	1_8_01_171211223541.raw	sp|Q8NE71|ABCF1_HUMAN	Q8NE71	ABCF1	AANAAENDFSVSQAEMSSR	C79H125N25O33S[M+2H]	AANAAENDFSVSQAEMSSR(+H2)	992.937	65.84	333417
1_9	1_9_01.raw	sp|Q8NE71|ABCF1_HUMAN	Q8NE71	ABCF1	AANAAENDFSVSQAEMSSR	C79H125N25O33S[M+2H]	AANAAENDFSVSQAEMSSR(+H2)	992.937	65.84	889831
2_7	2_7_01.raw	sp|Q8NE71|ABCF1_HUMAN	Q8NE71	ABCF1	AANAAENDFSVSQAEMSSR	C79H125N25O33S[M+2H]	AANAAENDFSVSQAEMSSR(+H2)	992.937	65.84	284203
2_8	2_8_01.raw	sp|Q8NE71|ABCF1_HUMAN	Q8NE71	ABCF1	AANAAENDFSVSQAEMSSR	C79H125N25O33S[M+2H]	AANAAENDFSVSQAEMSSR(+H2)	992.937	65.84	520041
2_9	2_9_01_171217123101.raw	sp|Q8NE71|ABCF1_HUMAN	Q8NE71	ABCF1	AANAAENDFSVSQAEMSSR	C79H125N25O33S[M+2H]	AANAAENDFSVSQAEMSSR(+H2)	992.937	65.84	408669
3_7	3_7_01.raw	sp|Q8NE71|ABCF1_HUMAN	Q8NE71	ABCF1	AANAAENDFSVSQAEMSSR	C79H125N25O33S[M+2H]	AANAAENDFSVSQAEMSSR(+H2)	992.937	65.84	110378
3_8	3_8_01.raw	sp|Q8NE71|ABCF1_HUMAN	Q8NE71	ABCF1	AANAAENDFSVSQAEMSSR	C79H125N25O33S[M+2H]	AANAAENDFSVSQAEMSSR(+H2)	992.937	65.84	219085
3_9	3_9_01.raw	sp|Q8NE71|ABCF1_HUMAN	Q8NE71	ABCF1	AANAAENDFSVSQAEMSSR	C79H125N25O33S[M+2H]	AANAAENDFSVSQAEMSSR(+H2)	992.937	65.84	263987
4_7	4_7_01.raw	sp|Q8NE71|ABCF1_HUMAN	Q8NE71	ABCF1	AANAAENDFSVSQAEMSSR	C79H125N25O33S[M+2H]	AANAAENDFSVSQAEMSSR(+H2)	992.937	65.84	248873
4_8	4_8_01.raw	sp|Q8NE71|ABCF1_HUMAN	Q8NE71	ABCF1	AANAAENDFSVSQAEMSSR	C79H125N25O33S[M+2H]	AANAAENDFSVSQAEMSSR(+H2)	992.937	65.84	122794
4_9	4_9_01.raw	sp|Q8NE71|ABCF1_HUMAN	Q8NE71	ABCF1	AANAAENDFSVSQAEMSSR	C79H125N25O33S[M+2H]	AANAAENDFSVSQAEMSSR(+H2)	992.937	65.84	167116
1_10	1_10_01.raw	sp|Q8NE71|ABCF1_HUMAN	Q8NE71	ABCF1	AANAAENDFSVSQAEMSSR	C79H125N25O33S[M+2H]	AANAAENDFSVSQAEMSSR(+H2)	992.937	65.84	671134
1_11	1_11_01.raw	sp|Q8NE71|ABCF1_HUMAN	Q8NE71	ABCF1	AANAAENDFSVSQAEMSSR	C79H125N25O33S[M+2H]	AANAAENDFSVSQAEMSSR(+H2)	992.937	65.84	221938
1_12	1_12_01.raw	sp|Q8NE71|ABCF1_HUMAN	Q8NE71	ABCF1	AANAAENDFSVSQAEMSSR	C79H125N25O33S[M+2H]	AANAAENDFSVSQAEMSSR(+H2)	992.937	65.84	54482
2_10	2_10_01.raw	sp|Q8NE71|ABCF1_HUMAN	Q8NE71	ABCF1	AANAAENDFSVSQAEMSSR	C79H125N25O33S[M+2H]	AANAAENDFSVSQAEMSSR(+H2)	992.937	65.84	449346
2_11	2_11_01_171223040132.raw	sp|Q8NE71|ABCF1_HUMAN	Q8NE71	ABCF1	AANAAENDFSVSQAEMSSR	C79H125N25O33S[M+2H]	AANAAENDFSVSQAEMSSR(+H2)	992.937	65.84	387072
2_12	2_12_01.raw	sp|Q8NE71|ABCF1_HUMAN	Q8NE71	ABCF1	AANAAENDFSVSQAEMSSR	C79H125N25O33S[M+2H]	AANAAENDFSVSQAEMSSR(+H2)	992.937	65.84	259299
3_10	3_10_01.raw	sp|Q8NE71|ABCF1_HUMAN	Q8NE71	ABCF1	AANAAENDFSVSQAEMSSR	C79H125N25O33S[M+2H]	AANAAENDFSVSQAEMSSR(+H2)	992.937	65.84	116100
3_11	3_11_01.raw	sp|Q8NE71|ABCF1_HUMAN	Q8NE71	ABCF1	AANAAENDFSVSQAEMSSR	C79H125N25O33S[M+2H]	AANAAENDFSVSQAEMSSR(+H2)	992.937	65.84	76898
Chromatograms	FinalList2_2.raw	sp|Q8NE71|ABCF1_HUMAN	Q8NE71	ABCF1	STLLLLLTGK	C49H91N11O14[M+2H]	STLLLLLTGK(+H2)	529.845	113.5	7583526
GPS01	GPS01_1.raw	sp|Q8NE71|ABCF1_HUMAN	Q8NE71	ABCF1	STLLLLLTGK	C49H91N11O14[M+2H]	STLLLLLTGK(+H2)	529.845	113.5	9995759
GPS02	GPS02_1.raw	sp|Q8NE71|ABCF1_HUMAN	Q8NE71	ABCF1	STLLLLLTGK	C49H91N11O14[M+2H]	STLLLLLTGK(+H2)	529.845	113.5	5941814
GPS03	GPS03_1.raw	sp|Q8NE71|ABCF1_HUMAN	Q8NE71	ABCF1	STLLLLLTGK	C49H91N11O14[M+2H]	STLLLLLTGK(+H2)	529.845	113.5	3421336
GPS04	GPS04_1.raw	sp|Q8NE71|ABCF1_HUMAN	Q8NE71	ABCF1	STLLLLLTGK	C49H91N11O14[M+2H]	STLLLLLTGK(+H2)	529.845	113.5	5805608
GPS05	GPS_05_01.raw	sp|Q8NE71|ABCF1_HUMAN	Q8NE71	ABCF1	STLLLLLTGK	C49H91N11O14[M+2H]	STLLLLLTGK(+H2)	529.845	113.5	5717960
GPS06	GPS_06_01.raw	sp|Q8NE71|ABCF1_HUMAN	Q8NE71	ABCF1	STLLLLLTGK	C49H91N11O14[M+2H]	STLLLLLTGK(+H2)	529.845	113.5	4484411
1_1	1_1_01.raw	sp|Q8NE71|ABCF1_HUMAN	Q8NE71	ABCF1	STLLLLLTGK	C49H91N11O14[M+2H]	STLLLLLTGK(+H2)	529.845	113.5	3622865
1_2	1_2_01.raw	sp|Q8NE71|ABCF1_HUMAN	Q8NE71	ABCF1	STLLLLLTGK	C49H91N11O14[M+2H]	STLLLLLTGK(+H2)	529.845	113.5	6569018
1_3	1_3_01.raw	sp|Q8NE71|ABCF1_HUMAN	Q8NE71	ABCF1	STLLLLLTGK	C49H91N11O14[M+2H]	STLLLLLTGK(+H2)	529.845	113.5	5725404
2_1	2_1_01.raw	sp|Q8NE71|ABCF1_HUMAN	Q8NE71	ABCF1	STLLLLLTGK	C49H91N11O14[M+2H]	STLLLLLTGK(+H2)	529.845	113.5	1910312
2_2	2_2_01.raw	sp|Q8NE71|ABCF1_HUMAN	Q8NE71	ABCF1	STLLLLLTGK	C49H91N11O14[M+2H]	STLLLLLTGK(+H2)	529.845	113.5	8099066
2_3	2_3_01.raw	sp|Q8NE71|ABCF1_HUMAN	Q8NE71	ABCF1	STLLLLLTGK	C49H91N11O14[M+2H]	STLLLLLTGK(+H2)	529.845	113.5	10149398
3_1	3_1_01.raw	sp|Q8NE71|ABCF1_HUMAN	Q8NE71	ABCF1	STLLLLLTGK	C49H91N11O14[M+2H]	STLLLLLTGK(+H2)	529.845	113.5	1440456
3_2	3_2_01_171223210221.raw	sp|Q8NE71|ABCF1_HUMAN	Q8NE71	ABCF1	STLLLLLTGK	C49H91N11O14[M+2H]	STLLLLLTGK(+H2)	529.845	113.5	2153180
3_3	3_3_01.raw	sp|Q8NE71|ABCF1_HUMAN	Q8NE71	ABCF1	STLLLLLTGK	C49H91N11O14[M+2H]	STLLLLLTGK(+H2)	529.845	113.5	2677478
4_1	4_1_01.raw	sp|Q8NE71|ABCF1_HUMAN	Q8NE71	ABCF1	STLLLLLTGK	C49H91N11O14[M+2H]	STLLLLLTGK(+H2)	529.845	113.5	591973
4_2	4_2_01.raw	sp|Q8NE71|ABCF1_HUMAN	Q8NE71	ABCF1	STLLLLLTGK	C49H91N11O14[M+2H]	STLLLLLTGK(+H2)	529.845	113.5	3614933
4_3	4_3_01.raw	sp|Q8NE71|ABCF1_HUMAN	Q8NE71	ABCF1	STLLLLLTGK	C49H91N11O14[M+2H]	STLLLLLTGK(+H2)	529.845	113.5	3762513
1_4	1_4_01.raw	sp|Q8NE71|ABCF1_HUMAN	Q8NE71	ABCF1	STLLLLLTGK	C49H91N11O14[M+2H]	STLLLLLTGK(+H2)	529.845	113.5	5947681
1_5	1_5_01.raw	sp|Q8NE71|ABCF1_HUMAN	Q8NE71	ABCF1	STLLLLLTGK	C49H91N11O14[M+2H]	STLLLLLTGK(+H2)	529.845	113.5	3838262
1_6	1_6_01.raw	sp|Q8NE71|ABCF1_HUMAN	Q8NE71	ABCF1	STLLLLLTGK	C49H91N11O14[M+2H]	STLLLLLTGK(+H2)	529.845	113.5	8689121
2_4	2_4_01.raw	sp|Q8NE71|ABCF1_HUMAN	Q8NE71	ABCF1	STLLLLLTGK	C49H91N11O14[M+2H]	STLLLLLTGK(+H2)	529.845	113.5	10451730
2_5	2_5_01.raw	sp|Q8NE71|ABCF1_HUMAN	Q8NE71	ABCF1	STLLLLLTGK	C49H91N11O14[M+2H]	STLLLLLTGK(+H2)	529.845	113.5	10896822
2_6	2_6_01.raw	sp|Q8NE71|ABCF1_HUMAN	Q8NE71	ABCF1	STLLLLLTGK	C49H91N11O14[M+2H]	STLLLLLTGK(+H2)	529.845	113.5	8310810
3_4	3_4_01.raw	sp|Q8NE71|ABCF1_HUMAN	Q8NE71	ABCF1	STLLLLLTGK	C49H91N11O14[M+2H]	STLLLLLTGK(+H2)	529.845	113.5	3012220
3_5	3_5_01.raw	sp|Q8NE71|ABCF1_HUMAN	Q8NE71	ABCF1	STLLLLLTGK	C49H91N11O14[M+2H]	STLLLLLTGK(+H2)	529.845	113.5	2740864
3_6	3_6_01.raw	sp|Q8NE71|ABCF1_HUMAN	Q8NE71	ABCF1	STLLLLLTGK	C49H91N11O14[M+2H]	STLLLLLTGK(+H2)	529.845	113.5	2293500
4_4	4_4_01.raw	sp|Q8NE71|ABCF1_HUMAN	Q8NE71	ABCF1	STLLLLLTGK	C49H91N11O14[M+2H]	STLLLLLTGK(+H2)	529.845	113.5	8404657
4_5	4_5_01.raw	sp|Q8NE71|ABCF1_HUMAN	Q8NE71	ABCF1	STLLLLLTGK	C49H91N11O14[M+2H]	STLLLLLTGK(+H2)	529.845	113.5	3042394
4_6	4_6_01.raw	sp|Q8NE71|ABCF1_HUMAN	Q8NE71	ABCF1	STLLLLLTGK	C49H91N11O14[M+2H]	STLLLLLTGK(+H2)	529.845	113.5	2952084
1_7	1_7_01.raw	sp|Q8NE71|ABCF1_HUMAN	Q8NE71	ABCF1	STLLLLLTGK	C49H91N11O14[M+2H]	STLLLLLTGK(+H2)	529.845	113.5	4094293
1_8	1_8_01_171211223541.raw	sp|Q8NE71|ABCF1_HUMAN	Q8NE71	ABCF1	STLLLLLTGK	C49H91N11O14[M+2H]	STLLLLLTGK(+H2)	529.845	113.5	3087832
1_9	1_9_01.raw	sp|Q8NE71|ABCF1_HUMAN	Q8NE71	ABCF1	STLLLLLTGK	C49H91N11O14[M+2H]	STLLLLLTGK(+H2)	529.845	113.5	5867358
2_7	2_7_01.raw	sp|Q8NE71|ABCF1_HUMAN	Q8NE71	ABCF1	STLLLLLTGK	C49H91N11O14[M+2H]	STLLLLLTGK(+H2)	529.845	113.5	4890877
2_8	2_8_01.raw	sp|Q8NE71|ABCF1_HUMAN	Q8NE71	ABCF1	STLLLLLTGK	C49H91N11O14[M+2H]	STLLLLLTGK(+H2)	529.845	113.5	7989634
2_9	2_9_01_171217123101.raw	sp|Q8NE71|ABCF1_HUMAN	Q8NE71	ABCF1	STLLLLLTGK	C49H91N11O14[M+2H]	STLLLLLTGK(+H2)	529.845	113.5	8999217
3_7	3_7_01.raw	sp|Q8NE71|ABCF1_HUMAN	Q8NE71	ABCF1	STLLLLLTGK	C49H91N11O14[M+2H]	STLLLLLTGK(+H2)	529.845	113.5	1751193
3_8	3_8_01.raw	sp|Q8NE71|ABCF1_HUMAN	Q8NE71	ABCF1	STLLLLLTGK	C49H91N11O14[M+2H]	STLLLLLTGK(+H2)	529.845	113.5	4453524
3_9	3_9_01.raw	sp|Q8NE71|ABCF1_HUMAN	Q8NE71	ABCF1	STLLLLLTGK	C49H91N11O14[M+2H]	STLLLLLTGK(+H2)	529.845	113.5	4016457
4_7	4_7_01.raw	sp|Q8NE71|ABCF1_HUMAN	Q8NE71	ABCF1	STLLLLLTGK	C49H91N11O14[M+2H]	STLLLLLTGK(+H2)	529.845	113.5	2957420
4_8	4_8_01.raw	sp|Q8NE71|ABCF1_HUMAN	Q8NE71	ABCF1	STLLLLLTGK	C49H91N11O14[M+2H]	STLLLLLTGK(+H2)	529.845	113.5	2701315
4_9	4_9_01.raw	sp|Q8NE71|ABCF1_HUMAN	Q8NE71	ABCF1	STLLLLLTGK	C49H91N11O14[M+2H]	STLLLLLTGK(+H2)	529.845	113.5	3392465
1_10	1_10_01.raw	sp|Q8NE71|ABCF1_HUMAN	Q8NE71	ABCF1	STLLLLLTGK	C49H91N11O14[M+2H]	STLLLLLTGK(+H2)	529.845	113.5	7885322
1_11	1_11_01.raw	sp|Q8NE71|ABCF1_HUMAN	Q8NE71	ABCF1	STLLLLLTGK	C49H91N11O14[M+2H]	STLLLLLTGK(+H2)	529.845	113.5	3253237
1_12	1_12_01.raw	sp|Q8NE71|ABCF1_HUMAN	Q8NE71	ABCF1	STLLLLLTGK	C49H91N11O14[M+2H]	STLLLLLTGK(+H2)	529.845	113.5	2551991
2_10	2_10_01.raw	sp|Q8NE71|ABCF1_HUMAN	Q8NE71	ABCF1	STLLLLLTGK	C49H91N11O14[M+2H]	STLLLLLTGK(+H2)	529.845	113.5	7307149
2_11	2_11_01_171223040132.raw	sp|Q8NE71|ABCF1_HUMAN	Q8NE71	ABCF1	STLLLLLTGK	C49H91N11O14[M+2H]	STLLLLLTGK(+H2)	529.845	113.5	2114593
2_12	2_12_01.raw	sp|Q8NE71|ABCF1_HUMAN	Q8NE71	ABCF1	STLLLLLTGK	C49H91N11O14[M+2H]	STLLLLLTGK(+H2)	529.845	113.5	1054865
3_10	3_10_01.raw	sp|Q8NE71|ABCF1_HUMAN	Q8NE71	ABCF1	STLLLLLTGK	C49H91N11O14[M+2H]	STLLLLLTGK(+H2)	529.845	113.5	2324779
3_11	3_11_01.raw	sp|Q8NE71|ABCF1_HUMAN	Q8NE71	ABCF1	STLLLLLTGK	C49H91N11O14[M+2H]	STLLLLLTGK(+H2)	529.845	113.5	3985634
Chromatograms	FinalList2_1.raw	N/A	N/A	ABETA	DAEFR	C27H40N8O10[M+H]	DAEFR(+H1)	637.294	41.32	5372809
GPS01	GPS01_1.raw	N/A	N/A	ABETA	DAEFR	C27H40N8O10[M+H]	DAEFR(+H1)	637.294	41.32	41540104
GPS02	GPS02_1.raw	N/A	N/A	ABETA	DAEFR	C27H40N8O10[M+H]	DAEFR(+H1)	637.294	41.32	37694428
GPS03	GPS03_1.raw	N/A	N/A	ABETA	DAEFR	C27H40N8O10[M+H]	DAEFR(+H1)	637.294	41.32	30219804
GPS04	GPS04_1.raw	N/A	N/A	ABETA	DAEFR	C27H40N8O10[M+H]	DAEFR(+H1)	637.294	41.32	30161210
GPS05	GPS_05_01.raw	N/A	N/A	ABETA	DAEFR	C27H40N8O10[M+H]	DAEFR(+H1)	637.294	41.32	40354956
GPS06	GPS_06_01.raw	N/A	N/A	ABETA	DAEFR	C27H40N8O10[M+H]	DAEFR(+H1)	637.294	41.32	33120864
1_1	1_1_01.raw	N/A	N/A	ABETA	DAEFR	C27H40N8O10[M+H]	DAEFR(+H1)	637.294	41.32	53375000
1_2	1_2_01.raw	N/A	N/A	ABETA	DAEFR	C27H40N8O10[M+H]	DAEFR(+H1)	637.294	41.32	323459328
1_3	1_3_01.raw	N/A	N/A	ABETA	DAEFR	C27H40N8O10[M+H]	DAEFR(+H1)	637.294	41.32	68284624
2_1	2_1_01.raw	N/A	N/A	ABETA	DAEFR	C27H40N8O10[M+H]	DAEFR(+H1)	637.294	41.32	45744844
2_2	2_2_01.raw	N/A	N/A	ABETA	DAEFR	C27H40N8O10[M+H]	DAEFR(+H1)	637.294	41.32	55326432
2_3	2_3_01.raw	N/A	N/A	ABETA	DAEFR	C27H40N8O10[M+H]	DAEFR(+H1)	637.294	41.32	92972776
3_1	3_1_01.raw	N/A	N/A	ABETA	DAEFR	C27H40N8O10[M+H]	DAEFR(+H1)	637.294	41.32	64155992
3_2	3_2_01_171223210221.raw	N/A	N/A	ABETA	DAEFR	C27H40N8O10[M+H]	DAEFR(+H1)	637.294	41.32	66354608
3_3	3_3_01.raw	N/A	N/A	ABETA	DAEFR	C27H40N8O10[M+H]	DAEFR(+H1)	637.294	41.32	21320900
4_1	4_1_01.raw	N/A	N/A	ABETA	DAEFR	C27H40N8O10[M+H]	DAEFR(+H1)	637.294	41.32	17669732
4_2	4_2_01.raw	N/A	N/A	ABETA	DAEFR	C27H40N8O10[M+H]	DAEFR(+H1)	637.294	41.32	98040992
4_3	4_3_01.raw	N/A	N/A	ABETA	DAEFR	C27H40N8O10[M+H]	DAEFR(+H1)	637.294	41.32	91445024
1_4	1_4_01.raw	N/A	N/A	ABETA	DAEFR	C27H40N8O10[M+H]	DAEFR(+H1)	637.294	41.32	377860
1_5	1_5_01.raw	N/A	N/A	ABETA	DAEFR	C27H40N8O10[M+H]	DAEFR(+H1)	637.294	41.32	699064
1_6	1_6_01.raw	N/A	N/A	ABETA	DAEFR	C27H40N8O10[M+H]	DAEFR(+H1)	637.294	41.32	7577424
2_4	2_4_01.raw	N/A	N/A	ABETA	DAEFR	C27H40N8O10[M+H]	DAEFR(+H1)	637.294	41.32	896974
2_5	2_5_01.raw	N/A	N/A	ABETA	DAEFR	C27H40N8O10[M+H]	DAEFR(+H1)	637.294	41.32	4168599
2_6	2_6_01.raw	N/A	N/A	ABETA	DAEFR	C27H40N8O10[M+H]	DAEFR(+H1)	637.294	41.32	1086337
3_4	3_4_01.raw	N/A	N/A	ABETA	DAEFR	C27H40N8O10[M+H]	DAEFR(+H1)	637.294	41.32	491230
3_5	3_5_01.raw	N/A	N/A	ABETA	DAEFR	C27H40N8O10[M+H]	DAEFR(+H1)	637.294	41.32	238822
3_6	3_6_01.raw	N/A	N/A	ABETA	DAEFR	C27H40N8O10[M+H]	DAEFR(+H1)	637.294	41.32	944876
4_4	4_4_01.raw	N/A	N/A	ABETA	DAEFR	C27H40N8O10[M+H]	DAEFR(+H1)	637.294	41.32	393906
4_5	4_5_01.raw	N/A	N/A	ABETA	DAEFR	C27H40N8O10[M+H]	DAEFR(+H1)	637.294	41.32	308664
4_6	4_6_01.raw	N/A	N/A	ABETA	DAEFR	C27H40N8O10[M+H]	DAEFR(+H1)	637.294	41.32	12033981
1_7	1_7_01.raw	N/A	N/A	ABETA	DAEFR	C27H40N8O10[M+H]	DAEFR(+H1)	637.294	41.32	828526
1_8	1_8_01_171211223541.raw	N/A	N/A	ABETA	DAEFR	C27H40N8O10[M+H]	DAEFR(+H1)	637.294	41.32	351017
1_9	1_9_01.raw	N/A	N/A	ABETA	DAEFR	C27H40N8O10[M+H]	DAEFR(+H1)	637.294	41.32	871914
2_7	2_7_01.raw	N/A	N/A	ABETA	DAEFR	C27H40N8O10[M+H]	DAEFR(+H1)	637.294	41.32	908776
2_8	2_8_01.raw	N/A	N/A	ABETA	DAEFR	C27H40N8O10[M+H]	DAEFR(+H1)	637.294	41.32	446586
2_9	2_9_01_171217123101.raw	N/A	N/A	ABETA	DAEFR	C27H40N8O10[M+H]	DAEFR(+H1)	637.294	41.32	936816
3_7	3_7_01.raw	N/A	N/A	ABETA	DAEFR	C27H40N8O10[M+H]	DAEFR(+H1)	637.294	41.32	397919
3_8	3_8_01.raw	N/A	N/A	ABETA	DAEFR	C27H40N8O10[M+H]	DAEFR(+H1)	637.294	41.32	314129
3_9	3_9_01.raw	N/A	N/A	ABETA	DAEFR	C27H40N8O10[M+H]	DAEFR(+H1)	637.294	41.32	582873
4_7	4_7_01.raw	N/A	N/A	ABETA	DAEFR	C27H40N8O10[M+H]	DAEFR(+H1)	637.294	41.32	5999385
4_8	4_8_01.raw	N/A	N/A	ABETA	DAEFR	C27H40N8O10[M+H]	DAEFR(+H1)	637.294	41.32	673846
4_9	4_9_01.raw	N/A	N/A	ABETA	DAEFR	C27H40N8O10[M+H]	DAEFR(+H1)	637.294	41.32	217004
1_10	1_10_01.raw	N/A	N/A	ABETA	DAEFR	C27H40N8O10[M+H]	DAEFR(+H1)	637.294	41.32	19414174
1_11	1_11_01.raw	N/A	N/A	ABETA	DAEFR	C27H40N8O10[M+H]	DAEFR(+H1)	637.294	41.32	50918592
1_12	1_12_01.raw	N/A	N/A	ABETA	DAEFR	C27H40N8O10[M+H]	DAEFR(+H1)	637.294	41.32	132499912
2_10	2_10_01.raw	N/A	N/A	ABETA	DAEFR	C27H40N8O10[M+H]	DAEFR(+H1)	637.294	41.32	59762560
2_11	2_11_01_171223040132.raw	N/A	N/A	ABETA	DAEFR	C27H40N8O10[M+H]	DAEFR(+H1)	637.294	41.32	56998920
2_12	2_12_01.raw	N/A	N/A	ABETA	DAEFR	C27H40N8O10[M+H]	DAEFR(+H1)	637.294	41.32	8553990
3_10	3_10_01.raw	N/A	N/A	ABETA	DAEFR	C27H40N8O10[M+H]	DAEFR(+H1)	637.294	41.32	62697856
3_11	3_11_01.raw	N/A	N/A	ABETA	DAEFR	C27H40N8O10[M+H]	DAEFR(+H1)	637.294	41.32	9457532
Chromatograms	FinalList2_2.raw	N/A	N/A	ABETA	DAEFR	C27H40N8O10[M+2H]	DAEFR(+H2)	319.151	41.32	35375584
GPS01	GPS01_1.raw	N/A	N/A	ABETA	DAEFR	C27H40N8O10[M+2H]	DAEFR(+H2)	319.151	41.32	249261936
GPS02	GPS02_1.raw	N/A	N/A	ABETA	DAEFR	C27H40N8O10[M+2H]	DAEFR(+H2)	319.151	41.32	229414176
GPS03	GPS03_1.raw	N/A	N/A	ABETA	DAEFR	C27H40N8O10[M+2H]	DAEFR(+H2)	319.151	41.32	155684720
GPS04	GPS04_1.raw	N/A	N/A	ABETA	DAEFR	C27H40N8O10[M+2H]	DAEFR(+H2)	319.151	41.32	160069248
GPS05	GPS_05_01.raw	N/A	N/A	ABETA	DAEFR	C27H40N8O10[M+2H]	DAEFR(+H2)	319.151	41.32	94505672
GPS06	GPS_06_01.raw	N/A	N/A	ABETA	DAEFR	C27H40N8O10[M+2H]	DAEFR(+H2)	319.151	41.32	82752648
1_1	1_1_01.raw	N/A	N/A	ABETA	DAEFR	C27H40N8O10[M+2H]	DAEFR(+H2)	319.151	41.32	350385280
1_2	1_2_01.raw	N/A	N/A	ABETA	DAEFR	C27H40N8O10[M+2H]	DAEFR(+H2)	319.151	41.32	1496880640
1_3	1_3_01.raw	N/A	N/A	ABETA	DAEFR	C27H40N8O10[M+2H]	DAEFR(+H2)	319.151	41.32	386748352
2_1	2_1_01.raw	N/A	N/A	ABETA	DAEFR	C27H40N8O10[M+2H]	DAEFR(+H2)	319.151	41.32	238085200
2_2	2_2_01.raw	N/A	N/A	ABETA	DAEFR	C27H40N8O10[M+2H]	DAEFR(+H2)	319.151	41.32	261393456
2_3	2_3_01.raw	N/A	N/A	ABETA	DAEFR	C27H40N8O10[M+2H]	DAEFR(+H2)	319.151	41.32	465983232
3_1	3_1_01.raw	N/A	N/A	ABETA	DAEFR	C27H40N8O10[M+2H]	DAEFR(+H2)	319.151	41.32	427056320
3_2	3_2_01_171223210221.raw	N/A	N/A	ABETA	DAEFR	C27H40N8O10[M+2H]	DAEFR(+H2)	319.151	41.32	318249920
3_3	3_3_01.raw	N/A	N/A	ABETA	DAEFR	C27H40N8O10[M+2H]	DAEFR(+H2)	319.151	41.32	116283904
4_1	4_1_01.raw	N/A	N/A	ABETA	DAEFR	C27H40N8O10[M+2H]	DAEFR(+H2)	319.151	41.32	144228176
4_2	4_2_01.raw	N/A	N/A	ABETA	DAEFR	C27H40N8O10[M+2H]	DAEFR(+H2)	319.151	41.32	272446528
4_3	4_3_01.raw	N/A	N/A	ABETA	DAEFR	C27H40N8O10[M+2H]	DAEFR(+H2)	319.151	41.32	257370096
1_4	1_4_01.raw	N/A	N/A	ABETA	DAEFR	C27H40N8O10[M+2H]	DAEFR(+H2)	319.151	41.32	10897692
1_5	1_5_01.raw	N/A	N/A	ABETA	DAEFR	C27H40N8O10[M+2H]	DAEFR(+H2)	319.151	41.32	8427218
1_6	1_6_01.raw	N/A	N/A	ABETA	DAEFR	C27H40N8O10[M+2H]	DAEFR(+H2)	319.151	41.32	41678260
2_4	2_4_01.raw	N/A	N/A	ABETA	DAEFR	C27H40N8O10[M+2H]	DAEFR(+H2)	319.151	41.32	2838655
2_5	2_5_01.raw	N/A	N/A	ABETA	DAEFR	C27H40N8O10[M+2H]	DAEFR(+H2)	319.151	41.32	21231422
2_6	2_6_01.raw	N/A	N/A	ABETA	DAEFR	C27H40N8O10[M+2H]	DAEFR(+H2)	319.151	41.32	1617383
3_4	3_4_01.raw	N/A	N/A	ABETA	DAEFR	C27H40N8O10[M+2H]	DAEFR(+H2)	319.151	41.32	2033173
3_5	3_5_01.raw	N/A	N/A	ABETA	DAEFR	C27H40N8O10[M+2H]	DAEFR(+H2)	319.151	41.32	2958640
3_6	3_6_01.raw	N/A	N/A	ABETA	DAEFR	C27H40N8O10[M+2H]	DAEFR(+H2)	319.151	41.32	2002307
4_4	4_4_01.raw	N/A	N/A	ABETA	DAEFR	C27H40N8O10[M+2H]	DAEFR(+H2)	319.151	41.32	3142816
4_5	4_5_01.raw	N/A	N/A	ABETA	DAEFR	C27H40N8O10[M+2H]	DAEFR(+H2)	319.151	41.32	3241421
4_6	4_6_01.raw	N/A	N/A	ABETA	DAEFR	C27H40N8O10[M+2H]	DAEFR(+H2)	319.151	41.32	37290884
1_7	1_7_01.raw	N/A	N/A	ABETA	DAEFR	C27H40N8O10[M+2H]	DAEFR(+H2)	319.151	41.32	11309257
1_8	1_8_01_171211223541.raw	N/A	N/A	ABETA	DAEFR	C27H40N8O10[M+2H]	DAEFR(+H2)	319.151	41.32	6897967
1_9	1_9_01.raw	N/A	N/A	ABETA	DAEFR	C27H40N8O10[M+2H]	DAEFR(+H2)	319.151	41.32	4346554
2_7	2_7_01.raw	N/A	N/A	ABETA	DAEFR	C27H40N8O10[M+2H]	DAEFR(+H2)	319.151	41.32	4949577
2_8	2_8_01.raw	N/A	N/A	ABETA	DAEFR	C27H40N8O10[M+2H]	DAEFR(+H2)	319.151	41.32	3182418
2_9	2_9_01_171217123101.raw	N/A	N/A	ABETA	DAEFR	C27H40N8O10[M+2H]	DAEFR(+H2)	319.151	41.32	6840270
3_7	3_7_01.raw	N/A	N/A	ABETA	DAEFR	C27H40N8O10[M+2H]	DAEFR(+H2)	319.151	41.32	6694811
3_8	3_8_01.raw	N/A	N/A	ABETA	DAEFR	C27H40N8O10[M+2H]	DAEFR(+H2)	319.151	41.32	3659927
3_9	3_9_01.raw	N/A	N/A	ABETA	DAEFR	C27H40N8O10[M+2H]	DAEFR(+H2)	319.151	41.32	4806575
4_7	4_7_01.raw	N/A	N/A	ABETA	DAEFR	C27H40N8O10[M+2H]	DAEFR(+H2)	319.151	41.32	24123944
4_8	4_8_01.raw	N/A	N/A	ABETA	DAEFR	C27H40N8O10[M+2H]	DAEFR(+H2)	319.151	41.32	4500135
4_9	4_9_01.raw	N/A	N/A	ABETA	DAEFR	C27H40N8O10[M+2H]	DAEFR(+H2)	319.151	41.32	3914495
1_10	1_10_01.raw	N/A	N/A	ABETA	DAEFR	C27H40N8O10[M+2H]	DAEFR(+H2)	319.151	41.32	96604192
1_11	1_11_01.raw	N/A	N/A	ABETA	DAEFR	C27H40N8O10[M+2H]	DAEFR(+H2)	319.151	41.32	252298864
1_12	1_12_01.raw	N/A	N/A	ABETA	DAEFR	C27H40N8O10[M+2H]	DAEFR(+H2)	319.151	41.32	738943616
2_10	2_10_01.raw	N/A	N/A	ABETA	DAEFR	C27H40N8O10[M+2H]	DAEFR(+H2)	319.151	41.32	167949680
2_11	2_11_01_171223040132.raw	N/A	N/A	ABETA	DAEFR	C27H40N8O10[M+2H]	DAEFR(+H2)	319.151	41.32	304519136
2_12	2_12_01.raw	N/A	N/A	ABETA	DAEFR	C27H40N8O10[M+2H]	DAEFR(+H2)	319.151	41.32	44859684
3_10	3_10_01.raw	N/A	N/A	ABETA	DAEFR	C27H40N8O10[M+2H]	DAEFR(+H2)	319.151	41.32	290967232
3_11	3_11_01.raw	N/A	N/A	ABETA	DAEFR	C27H40N8O10[M+2H]	DAEFR(+H2)	319.151	41.32	35194464
Chromatograms	FinalList2_2.raw	N/A	N/A	ABETA38	GAIIGLMVGG	C39H70N10O11S[M+H]	GAIIGLMVGG(+H1)	887.502	105.7	3509757
GPS01	GPS01_1.raw	N/A	N/A	ABETA38	GAIIGLMVGG	C39H70N10O11S[M+H]	GAIIGLMVGG(+H1)	887.502	105.7	5484471
GPS02	GPS02_1.raw	N/A	N/A	ABETA38	GAIIGLMVGG	C39H70N10O11S[M+H]	GAIIGLMVGG(+H1)	887.502	105.7	3787036
GPS03	GPS03_1.raw	N/A	N/A	ABETA38	GAIIGLMVGG	C39H70N10O11S[M+H]	GAIIGLMVGG(+H1)	887.502	105.7	2756439
GPS04	GPS04_1.raw	N/A	N/A	ABETA38	GAIIGLMVGG	C39H70N10O11S[M+H]	GAIIGLMVGG(+H1)	887.502	105.7	2937379
GPS05	GPS_05_01.raw	N/A	N/A	ABETA38	GAIIGLMVGG	C39H70N10O11S[M+H]	GAIIGLMVGG(+H1)	887.502	105.7	3548352
GPS06	GPS_06_01.raw	N/A	N/A	ABETA38	GAIIGLMVGG	C39H70N10O11S[M+H]	GAIIGLMVGG(+H1)	887.502	105.7	2300808
1_1	1_1_01.raw	N/A	N/A	ABETA38	GAIIGLMVGG	C39H70N10O11S[M+H]	GAIIGLMVGG(+H1)	887.502	105.7	378216
1_2	1_2_01.raw	N/A	N/A	ABETA38	GAIIGLMVGG	C39H70N10O11S[M+H]	GAIIGLMVGG(+H1)	887.502	105.7	92199928
1_3	1_3_01.raw	N/A	N/A	ABETA38	GAIIGLMVGG	C39H70N10O11S[M+H]	GAIIGLMVGG(+H1)	887.502	105.7	144578
2_1	2_1_01.raw	N/A	N/A	ABETA38	GAIIGLMVGG	C39H70N10O11S[M+H]	GAIIGLMVGG(+H1)	887.502	105.7	328176
2_2	2_2_01.raw	N/A	N/A	ABETA38	GAIIGLMVGG	C39H70N10O11S[M+H]	GAIIGLMVGG(+H1)	887.502	105.7	21591
2_3	2_3_01.raw	N/A	N/A	ABETA38	GAIIGLMVGG	C39H70N10O11S[M+H]	GAIIGLMVGG(+H1)	887.502	105.7	2109932
3_1	3_1_01.raw	N/A	N/A	ABETA38	GAIIGLMVGG	C39H70N10O11S[M+H]	GAIIGLMVGG(+H1)	887.502	105.7	0
3_2	3_2_01_171223210221.raw	N/A	N/A	ABETA38	GAIIGLMVGG	C39H70N10O11S[M+H]	GAIIGLMVGG(+H1)	887.502	105.7	389748
3_3	3_3_01.raw	N/A	N/A	ABETA38	GAIIGLMVGG	C39H70N10O11S[M+H]	GAIIGLMVGG(+H1)	887.502	105.7	0
4_1	4_1_01.raw	N/A	N/A	ABETA38	GAIIGLMVGG	C39H70N10O11S[M+H]	GAIIGLMVGG(+H1)	887.502	105.7	6314
4_2	4_2_01.raw	N/A	N/A	ABETA38	GAIIGLMVGG	C39H70N10O11S[M+H]	GAIIGLMVGG(+H1)	887.502	105.7	4413
4_3	4_3_01.raw	N/A	N/A	ABETA38	GAIIGLMVGG	C39H70N10O11S[M+H]	GAIIGLMVGG(+H1)	887.502	105.7	0
1_4	1_4_01.raw	N/A	N/A	ABETA38	GAIIGLMVGG	C39H70N10O11S[M+H]	GAIIGLMVGG(+H1)	887.502	105.7	0
1_5	1_5_01.raw	N/A	N/A	ABETA38	GAIIGLMVGG	C39H70N10O11S[M+H]	GAIIGLMVGG(+H1)	887.502	105.7	0
1_6	1_6_01.raw	N/A	N/A	ABETA38	GAIIGLMVGG	C39H70N10O11S[M+H]	GAIIGLMVGG(+H1)	887.502	105.7	5392
2_4	2_4_01.raw	N/A	N/A	ABETA38	GAIIGLMVGG	C39H70N10O11S[M+H]	GAIIGLMVGG(+H1)	887.502	105.7	0
2_5	2_5_01.raw	N/A	N/A	ABETA38	GAIIGLMVGG	C39H70N10O11S[M+H]	GAIIGLMVGG(+H1)	887.502	105.7	0
2_6	2_6_01.raw	N/A	N/A	ABETA38	GAIIGLMVGG	C39H70N10O11S[M+H]	GAIIGLMVGG(+H1)	887.502	105.7	0
3_4	3_4_01.raw	N/A	N/A	ABETA38	GAIIGLMVGG	C39H70N10O11S[M+H]	GAIIGLMVGG(+H1)	887.502	105.7	0
3_5	3_5_01.raw	N/A	N/A	ABETA38	GAIIGLMVGG	C39H70N10O11S[M+H]	GAIIGLMVGG(+H1)	887.502	105.7	0
3_6	3_6_01.raw	N/A	N/A	ABETA38	GAIIGLMVGG	C39H70N10O11S[M+H]	GAIIGLMVGG(+H1)	887.502	105.7	0
4_4	4_4_01.raw	N/A	N/A	ABETA38	GAIIGLMVGG	C39H70N10O11S[M+H]	GAIIGLMVGG(+H1)	887.502	105.7	36235
4_5	4_5_01.raw	N/A	N/A	ABETA38	GAIIGLMVGG	C39H70N10O11S[M+H]	GAIIGLMVGG(+H1)	887.502	105.7	0
4_6	4_6_01.raw	N/A	N/A	ABETA38	GAIIGLMVGG	C39H70N10O11S[M+H]	GAIIGLMVGG(+H1)	887.502	105.7	0
1_7	1_7_01.raw	N/A	N/A	ABETA38	GAIIGLMVGG	C39H70N10O11S[M+H]	GAIIGLMVGG(+H1)	887.502	105.7	0
1_8	1_8_01_171211223541.raw	N/A	N/A	ABETA38	GAIIGLMVGG	C39H70N10O11S[M+H]	GAIIGLMVGG(+H1)	887.502	105.7	0
1_9	1_9_01.raw	N/A	N/A	ABETA38	GAIIGLMVGG	C39H70N10O11S[M+H]	GAIIGLMVGG(+H1)	887.502	105.7	0
2_7	2_7_01.raw	N/A	N/A	ABETA38	GAIIGLMVGG	C39H70N10O11S[M+H]	GAIIGLMVGG(+H1)	887.502	105.7	0
2_8	2_8_01.raw	N/A	N/A	ABETA38	GAIIGLMVGG	C39H70N10O11S[M+H]	GAIIGLMVGG(+H1)	887.502	105.7	0
2_9	2_9_01_171217123101.raw	N/A	N/A	ABETA38	GAIIGLMVGG	C39H70N10O11S[M+H]	GAIIGLMVGG(+H1)	887.502	105.7	10162
3_7	3_7_01.raw	N/A	N/A	ABETA38	GAIIGLMVGG	C39H70N10O11S[M+H]	GAIIGLMVGG(+H1)	887.502	105.7	0
3_8	3_8_01.raw	N/A	N/A	ABETA38	GAIIGLMVGG	C39H70N10O11S[M+H]	GAIIGLMVGG(+H1)	887.502	105.7	0
3_9	3_9_01.raw	N/A	N/A	ABETA38	GAIIGLMVGG	C39H70N10O11S[M+H]	GAIIGLMVGG(+H1)	887.502	105.7	0
4_7	4_7_01.raw	N/A	N/A	ABETA38	GAIIGLMVGG	C39H70N10O11S[M+H]	GAIIGLMVGG(+H1)	887.502	105.7	0
4_8	4_8_01.raw	N/A	N/A	ABETA38	GAIIGLMVGG	C39H70N10O11S[M+H]	GAIIGLMVGG(+H1)	887.502	105.7	1317
4_9	4_9_01.raw	N/A	N/A	ABETA38	GAIIGLMVGG	C39H70N10O11S[M+H]	GAIIGLMVGG(+H1)	887.502	105.7	6770
1_10	1_10_01.raw	N/A	N/A	ABETA38	GAIIGLMVGG	C39H70N10O11S[M+H]	GAIIGLMVGG(+H1)	887.502	105.7	0
1_11	1_11_01.raw	N/A	N/A	ABETA38	GAIIGLMVGG	C39H70N10O11S[M+H]	GAIIGLMVGG(+H1)	887.502	105.7	1024474
1_12	1_12_01.raw	N/A	N/A	ABETA38	GAIIGLMVGG	C39H70N10O11S[M+H]	GAIIGLMVGG(+H1)	887.502	105.7	519634
2_10	2_10_01.raw	N/A	N/A	ABETA38	GAIIGLMVGG	C39H70N10O11S[M+H]	GAIIGLMVGG(+H1)	887.502	105.7	838815
2_11	2_11_01_171223040132.raw	N/A	N/A	ABETA38	GAIIGLMVGG	C39H70N10O11S[M+H]	GAIIGLMVGG(+H1)	887.502	105.7	52862
2_12	2_12_01.raw	N/A	N/A	ABETA38	GAIIGLMVGG	C39H70N10O11S[M+H]	GAIIGLMVGG(+H1)	887.502	105.7	4667
3_10	3_10_01.raw	N/A	N/A	ABETA38	GAIIGLMVGG	C39H70N10O11S[M+H]	GAIIGLMVGG(+H1)	887.502	105.7	0
3_11	3_11_01.raw	N/A	N/A	ABETA38	GAIIGLMVGG	C39H70N10O11S[M+H]	GAIIGLMVGG(+H1)	887.502	105.7	0
Chromatograms	FinalList2_1.raw	N/A	N/A	ABETA38	GAIIGLMVGG	C39H70N10O11S[M+2H]	GAIIGLMVGG(+H2)	444.255	105.7	215651
GPS01	GPS01_1.raw	N/A	N/A	ABETA38	GAIIGLMVGG	C39H70N10O11S[M+2H]	GAIIGLMVGG(+H2)	444.255	105.7	1055300
GPS02	GPS02_1.raw	N/A	N/A	ABETA38	GAIIGLMVGG	C39H70N10O11S[M+2H]	GAIIGLMVGG(+H2)	444.255	105.7	738463
GPS03	GPS03_1.raw	N/A	N/A	ABETA38	GAIIGLMVGG	C39H70N10O11S[M+2H]	GAIIGLMVGG(+H2)	444.255	105.7	206979
GPS04	GPS04_1.raw	N/A	N/A	ABETA38	GAIIGLMVGG	C39H70N10O11S[M+2H]	GAIIGLMVGG(+H2)	444.255	105.7	274852
GPS05	GPS_05_01.raw	N/A	N/A	ABETA38	GAIIGLMVGG	C39H70N10O11S[M+2H]	GAIIGLMVGG(+H2)	444.255	105.7	376802
GPS06	GPS_06_01.raw	N/A	N/A	ABETA38	GAIIGLMVGG	C39H70N10O11S[M+2H]	GAIIGLMVGG(+H2)	444.255	105.7	247944
1_1	1_1_01.raw	N/A	N/A	ABETA38	GAIIGLMVGG	C39H70N10O11S[M+2H]	GAIIGLMVGG(+H2)	444.255	105.7	23951
1_2	1_2_01.raw	N/A	N/A	ABETA38	GAIIGLMVGG	C39H70N10O11S[M+2H]	GAIIGLMVGG(+H2)	444.255	105.7	20162116
1_3	1_3_01.raw	N/A	N/A	ABETA38	GAIIGLMVGG	C39H70N10O11S[M+2H]	GAIIGLMVGG(+H2)	444.255	105.7	4006
2_1	2_1_01.raw	N/A	N/A	ABETA38	GAIIGLMVGG	C39H70N10O11S[M+2H]	GAIIGLMVGG(+H2)	444.255	105.7	124940
2_2	2_2_01.raw	N/A	N/A	ABETA38	GAIIGLMVGG	C39H70N10O11S[M+2H]	GAIIGLMVGG(+H2)	444.255	105.7	0
2_3	2_3_01.raw	N/A	N/A	ABETA38	GAIIGLMVGG	C39H70N10O11S[M+2H]	GAIIGLMVGG(+H2)	444.255	105.7	453369
3_1	3_1_01.raw	N/A	N/A	ABETA38	GAIIGLMVGG	C39H70N10O11S[M+2H]	GAIIGLMVGG(+H2)	444.255	105.7	0
3_2	3_2_01_171223210221.raw	N/A	N/A	ABETA38	GAIIGLMVGG	C39H70N10O11S[M+2H]	GAIIGLMVGG(+H2)	444.255	105.7	2665
3_3	3_3_01.raw	N/A	N/A	ABETA38	GAIIGLMVGG	C39H70N10O11S[M+2H]	GAIIGLMVGG(+H2)	444.255	105.7	0
4_1	4_1_01.raw	N/A	N/A	ABETA38	GAIIGLMVGG	C39H70N10O11S[M+2H]	GAIIGLMVGG(+H2)	444.255	105.7	4867
4_2	4_2_01.raw	N/A	N/A	ABETA38	GAIIGLMVGG	C39H70N10O11S[M+2H]	GAIIGLMVGG(+H2)	444.255	105.7	0
4_3	4_3_01.raw	N/A	N/A	ABETA38	GAIIGLMVGG	C39H70N10O11S[M+2H]	GAIIGLMVGG(+H2)	444.255	105.7	0
1_4	1_4_01.raw	N/A	N/A	ABETA38	GAIIGLMVGG	C39H70N10O11S[M+2H]	GAIIGLMVGG(+H2)	444.255	105.7	0
1_5	1_5_01.raw	N/A	N/A	ABETA38	GAIIGLMVGG	C39H70N10O11S[M+2H]	GAIIGLMVGG(+H2)	444.255	105.7	0
1_6	1_6_01.raw	N/A	N/A	ABETA38	GAIIGLMVGG	C39H70N10O11S[M+2H]	GAIIGLMVGG(+H2)	444.255	105.7	0
2_4	2_4_01.raw	N/A	N/A	ABETA38	GAIIGLMVGG	C39H70N10O11S[M+2H]	GAIIGLMVGG(+H2)	444.255	105.7	0
2_5	2_5_01.raw	N/A	N/A	ABETA38	GAIIGLMVGG	C39H70N10O11S[M+2H]	GAIIGLMVGG(+H2)	444.255	105.7	0
2_6	2_6_01.raw	N/A	N/A	ABETA38	GAIIGLMVGG	C39H70N10O11S[M+2H]	GAIIGLMVGG(+H2)	444.255	105.7	0
3_4	3_4_01.raw	N/A	N/A	ABETA38	GAIIGLMVGG	C39H70N10O11S[M+2H]	GAIIGLMVGG(+H2)	444.255	105.7	0
3_5	3_5_01.raw	N/A	N/A	ABETA38	GAIIGLMVGG	C39H70N10O11S[M+2H]	GAIIGLMVGG(+H2)	444.255	105.7	0
3_6	3_6_01.raw	N/A	N/A	ABETA38	GAIIGLMVGG	C39H70N10O11S[M+2H]	GAIIGLMVGG(+H2)	444.255	105.7	0
4_4	4_4_01.raw	N/A	N/A	ABETA38	GAIIGLMVGG	C39H70N10O11S[M+2H]	GAIIGLMVGG(+H2)	444.255	105.7	0
4_5	4_5_01.raw	N/A	N/A	ABETA38	GAIIGLMVGG	C39H70N10O11S[M+2H]	GAIIGLMVGG(+H2)	444.255	105.7	0
4_6	4_6_01.raw	N/A	N/A	ABETA38	GAIIGLMVGG	C39H70N10O11S[M+2H]	GAIIGLMVGG(+H2)	444.255	105.7	0
1_7	1_7_01.raw	N/A	N/A	ABETA38	GAIIGLMVGG	C39H70N10O11S[M+2H]	GAIIGLMVGG(+H2)	444.255	105.7	0
1_8	1_8_01_171211223541.raw	N/A	N/A	ABETA38	GAIIGLMVGG	C39H70N10O11S[M+2H]	GAIIGLMVGG(+H2)	444.255	105.7	0
1_9	1_9_01.raw	N/A	N/A	ABETA38	GAIIGLMVGG	C39H70N10O11S[M+2H]	GAIIGLMVGG(+H2)	444.255	105.7	#N/A
2_7	2_7_01.raw	N/A	N/A	ABETA38	GAIIGLMVGG	C39H70N10O11S[M+2H]	GAIIGLMVGG(+H2)	444.255	105.7	#N/A
2_8	2_8_01.raw	N/A	N/A	ABETA38	GAIIGLMVGG	C39H70N10O11S[M+2H]	GAIIGLMVGG(+H2)	444.255	105.7	0
2_9	2_9_01_171217123101.raw	N/A	N/A	ABETA38	GAIIGLMVGG	C39H70N10O11S[M+2H]	GAIIGLMVGG(+H2)	444.255	105.7	#N/A
3_7	3_7_01.raw	N/A	N/A	ABETA38	GAIIGLMVGG	C39H70N10O11S[M+2H]	GAIIGLMVGG(+H2)	444.255	105.7	#N/A
3_8	3_8_01.raw	N/A	N/A	ABETA38	GAIIGLMVGG	C39H70N10O11S[M+2H]	GAIIGLMVGG(+H2)	444.255	105.7	0
3_9	3_9_01.raw	N/A	N/A	ABETA38	GAIIGLMVGG	C39H70N10O11S[M+2H]	GAIIGLMVGG(+H2)	444.255	105.7	#N/A
4_7	4_7_01.raw	N/A	N/A	ABETA38	GAIIGLMVGG	C39H70N10O11S[M+2H]	GAIIGLMVGG(+H2)	444.255	105.7	0
4_8	4_8_01.raw	N/A	N/A	ABETA38	GAIIGLMVGG	C39H70N10O11S[M+2H]	GAIIGLMVGG(+H2)	444.255	105.7	0
4_9	4_9_01.raw	N/A	N/A	ABETA38	GAIIGLMVGG	C39H70N10O11S[M+2H]	GAIIGLMVGG(+H2)	444.255	105.7	0
1_10	1_10_01.raw	N/A	N/A	ABETA38	GAIIGLMVGG	C39H70N10O11S[M+2H]	GAIIGLMVGG(+H2)	444.255	105.7	#N/A
1_11	1_11_01.raw	N/A	N/A	ABETA38	GAIIGLMVGG	C39H70N10O11S[M+2H]	GAIIGLMVGG(+H2)	444.255	105.7	398069
1_12	1_12_01.raw	N/A	N/A	ABETA38	GAIIGLMVGG	C39H70N10O11S[M+2H]	GAIIGLMVGG(+H2)	444.255	105.7	205658
2_10	2_10_01.raw	N/A	N/A	ABETA38	GAIIGLMVGG	C39H70N10O11S[M+2H]	GAIIGLMVGG(+H2)	444.255	105.7	169570
2_11	2_11_01_171223040132.raw	N/A	N/A	ABETA38	GAIIGLMVGG	C39H70N10O11S[M+2H]	GAIIGLMVGG(+H2)	444.255	105.7	#N/A
2_12	2_12_01.raw	N/A	N/A	ABETA38	GAIIGLMVGG	C39H70N10O11S[M+2H]	GAIIGLMVGG(+H2)	444.255	105.7	#N/A
3_10	3_10_01.raw	N/A	N/A	ABETA38	GAIIGLMVGG	C39H70N10O11S[M+2H]	GAIIGLMVGG(+H2)	444.255	105.7	0
3_11	3_11_01.raw	N/A	N/A	ABETA38	GAIIGLMVGG	C39H70N10O11S[M+2H]	GAIIGLMVGG(+H2)	444.255	105.7	#N/A
Chromatograms	FinalList2_1.raw	N/A	N/A	ABETA40	GAIIGLMVGGVV	C49H88N12O13S[M+H]	GAIIGLMVGGVV(+H1)	1085.64	126.12	2549169
GPS01	GPS01_2.raw	N/A	N/A	ABETA40	GAIIGLMVGGVV	C49H88N12O13S[M+H]	GAIIGLMVGGVV(+H1)	1085.64	126.12	8001498
GPS02	GPS02_2.raw	N/A	N/A	ABETA40	GAIIGLMVGGVV	C49H88N12O13S[M+H]	GAIIGLMVGGVV(+H1)	1085.64	126.12	4192297
GPS03	GPS03_2.raw	N/A	N/A	ABETA40	GAIIGLMVGGVV	C49H88N12O13S[M+H]	GAIIGLMVGGVV(+H1)	1085.64	126.12	2738106
GPS04	GPS04_2.raw	N/A	N/A	ABETA40	GAIIGLMVGGVV	C49H88N12O13S[M+H]	GAIIGLMVGGVV(+H1)	1085.64	126.12	6640767
GPS05	GPS_05_02.raw	N/A	N/A	ABETA40	GAIIGLMVGGVV	C49H88N12O13S[M+H]	GAIIGLMVGGVV(+H1)	1085.64	126.12	318863
GPS06	GPS_06_02.raw	N/A	N/A	ABETA40	GAIIGLMVGGVV	C49H88N12O13S[M+H]	GAIIGLMVGGVV(+H1)	1085.64	126.12	66989
1_1	1_1_02.raw	N/A	N/A	ABETA40	GAIIGLMVGGVV	C49H88N12O13S[M+H]	GAIIGLMVGGVV(+H1)	1085.64	126.12	12814311
1_2	1_2_02.raw	N/A	N/A	ABETA40	GAIIGLMVGGVV	C49H88N12O13S[M+H]	GAIIGLMVGGVV(+H1)	1085.64	126.12	54706376
1_3	1_3_02.raw	N/A	N/A	ABETA40	GAIIGLMVGGVV	C49H88N12O13S[M+H]	GAIIGLMVGGVV(+H1)	1085.64	126.12	2174872
2_1	2_1_02.raw	N/A	N/A	ABETA40	GAIIGLMVGGVV	C49H88N12O13S[M+H]	GAIIGLMVGGVV(+H1)	1085.64	126.12	6582840
2_2	2_2_02.raw	N/A	N/A	ABETA40	GAIIGLMVGGVV	C49H88N12O13S[M+H]	GAIIGLMVGGVV(+H1)	1085.64	126.12	326498
2_3	2_3_02.raw	N/A	N/A	ABETA40	GAIIGLMVGGVV	C49H88N12O13S[M+H]	GAIIGLMVGGVV(+H1)	1085.64	126.12	27535268
3_1	3_1_02.raw	N/A	N/A	ABETA40	GAIIGLMVGGVV	C49H88N12O13S[M+H]	GAIIGLMVGGVV(+H1)	1085.64	126.12	31833
3_2	3_2_02.raw	N/A	N/A	ABETA40	GAIIGLMVGGVV	C49H88N12O13S[M+H]	GAIIGLMVGGVV(+H1)	1085.64	126.12	5203954
3_3	3_3_02.raw	N/A	N/A	ABETA40	GAIIGLMVGGVV	C49H88N12O13S[M+H]	GAIIGLMVGGVV(+H1)	1085.64	126.12	139647
4_1	4_1_02.raw	N/A	N/A	ABETA40	GAIIGLMVGGVV	C49H88N12O13S[M+H]	GAIIGLMVGGVV(+H1)	1085.64	126.12	34167360
4_2	4_2_02.raw	N/A	N/A	ABETA40	GAIIGLMVGGVV	C49H88N12O13S[M+H]	GAIIGLMVGGVV(+H1)	1085.64	126.12	14928283
4_3	4_3_02.raw	N/A	N/A	ABETA40	GAIIGLMVGGVV	C49H88N12O13S[M+H]	GAIIGLMVGGVV(+H1)	1085.64	126.12	4591013
1_4	1_4_02.raw	N/A	N/A	ABETA40	GAIIGLMVGGVV	C49H88N12O13S[M+H]	GAIIGLMVGGVV(+H1)	1085.64	126.12	13211
1_5	1_5_02.raw	N/A	N/A	ABETA40	GAIIGLMVGGVV	C49H88N12O13S[M+H]	GAIIGLMVGGVV(+H1)	1085.64	126.12	2069
1_6	1_6_02.raw	N/A	N/A	ABETA40	GAIIGLMVGGVV	C49H88N12O13S[M+H]	GAIIGLMVGGVV(+H1)	1085.64	126.12	20484
2_4	2_4_02.raw	N/A	N/A	ABETA40	GAIIGLMVGGVV	C49H88N12O13S[M+H]	GAIIGLMVGGVV(+H1)	1085.64	126.12	2182
2_5	2_5_02.raw	N/A	N/A	ABETA40	GAIIGLMVGGVV	C49H88N12O13S[M+H]	GAIIGLMVGGVV(+H1)	1085.64	126.12	87498
2_6	2_6_02.raw	N/A	N/A	ABETA40	GAIIGLMVGGVV	C49H88N12O13S[M+H]	GAIIGLMVGGVV(+H1)	1085.64	126.12	3544
3_4	3_4_02.raw	N/A	N/A	ABETA40	GAIIGLMVGGVV	C49H88N12O13S[M+H]	GAIIGLMVGGVV(+H1)	1085.64	126.12	0
3_5	3_5_02.raw	N/A	N/A	ABETA40	GAIIGLMVGGVV	C49H88N12O13S[M+H]	GAIIGLMVGGVV(+H1)	1085.64	126.12	1358
3_6	3_6_02.raw	N/A	N/A	ABETA40	GAIIGLMVGGVV	C49H88N12O13S[M+H]	GAIIGLMVGGVV(+H1)	1085.64	126.12	1949
4_4	4_4_02.raw	N/A	N/A	ABETA40	GAIIGLMVGGVV	C49H88N12O13S[M+H]	GAIIGLMVGGVV(+H1)	1085.64	126.12	0
4_5	4_5_02.raw	N/A	N/A	ABETA40	GAIIGLMVGGVV	C49H88N12O13S[M+H]	GAIIGLMVGGVV(+H1)	1085.64	126.12	0
4_6	4_6_02.raw	N/A	N/A	ABETA40	GAIIGLMVGGVV	C49H88N12O13S[M+H]	GAIIGLMVGGVV(+H1)	1085.64	126.12	0
1_7	1_7_02.raw	N/A	N/A	ABETA40	GAIIGLMVGGVV	C49H88N12O13S[M+H]	GAIIGLMVGGVV(+H1)	1085.64	126.12	0
1_8	1_8_02.raw	N/A	N/A	ABETA40	GAIIGLMVGGVV	C49H88N12O13S[M+H]	GAIIGLMVGGVV(+H1)	1085.64	126.12	2313
1_9	1_9_02.raw	N/A	N/A	ABETA40	GAIIGLMVGGVV	C49H88N12O13S[M+H]	GAIIGLMVGGVV(+H1)	1085.64	126.12	0
2_7	2_7_02.raw	N/A	N/A	ABETA40	GAIIGLMVGGVV	C49H88N12O13S[M+H]	GAIIGLMVGGVV(+H1)	1085.64	126.12	32130
2_8	2_8_02.raw	N/A	N/A	ABETA40	GAIIGLMVGGVV	C49H88N12O13S[M+H]	GAIIGLMVGGVV(+H1)	1085.64	126.12	19244
2_9	2_9_02_171217160937.raw	N/A	N/A	ABETA40	GAIIGLMVGGVV	C49H88N12O13S[M+H]	GAIIGLMVGGVV(+H1)	1085.64	126.12	5706
3_7	3_7_02.raw	N/A	N/A	ABETA40	GAIIGLMVGGVV	C49H88N12O13S[M+H]	GAIIGLMVGGVV(+H1)	1085.64	126.12	1646
3_8	3_8_02.raw	N/A	N/A	ABETA40	GAIIGLMVGGVV	C49H88N12O13S[M+H]	GAIIGLMVGGVV(+H1)	1085.64	126.12	0
3_9	3_9_02.raw	N/A	N/A	ABETA40	GAIIGLMVGGVV	C49H88N12O13S[M+H]	GAIIGLMVGGVV(+H1)	1085.64	126.12	3987
4_7	4_7_02.raw	N/A	N/A	ABETA40	GAIIGLMVGGVV	C49H88N12O13S[M+H]	GAIIGLMVGGVV(+H1)	1085.64	126.12	0
4_8	4_8_02.raw	N/A	N/A	ABETA40	GAIIGLMVGGVV	C49H88N12O13S[M+H]	GAIIGLMVGGVV(+H1)	1085.64	126.12	0
4_9	4_9_02.raw	N/A	N/A	ABETA40	GAIIGLMVGGVV	C49H88N12O13S[M+H]	GAIIGLMVGGVV(+H1)	1085.64	126.12	0
1_10	1_10_02.raw	N/A	N/A	ABETA40	GAIIGLMVGGVV	C49H88N12O13S[M+H]	GAIIGLMVGGVV(+H1)	1085.64	126.12	8902
1_11	1_11_02.raw	N/A	N/A	ABETA40	GAIIGLMVGGVV	C49H88N12O13S[M+H]	GAIIGLMVGGVV(+H1)	1085.64	126.12	11321772
1_12	1_12_02.raw	N/A	N/A	ABETA40	GAIIGLMVGGVV	C49H88N12O13S[M+H]	GAIIGLMVGGVV(+H1)	1085.64	126.12	559221
2_10	2_10_02.raw	N/A	N/A	ABETA40	GAIIGLMVGGVV	C49H88N12O13S[M+H]	GAIIGLMVGGVV(+H1)	1085.64	126.12	4897818
2_11	2_11_02.raw	N/A	N/A	ABETA40	GAIIGLMVGGVV	C49H88N12O13S[M+H]	GAIIGLMVGGVV(+H1)	1085.64	126.12	393792
2_12	2_12_02.raw	N/A	N/A	ABETA40	GAIIGLMVGGVV	C49H88N12O13S[M+H]	GAIIGLMVGGVV(+H1)	1085.64	126.12	4546
3_10	3_10_02.raw	N/A	N/A	ABETA40	GAIIGLMVGGVV	C49H88N12O13S[M+H]	GAIIGLMVGGVV(+H1)	1085.64	126.12	0
3_11	3_11_02.raw	N/A	N/A	ABETA40	GAIIGLMVGGVV	C49H88N12O13S[M+H]	GAIIGLMVGGVV(+H1)	1085.64	126.12	0
Chromatograms	FinalList2_2.raw	N/A	N/A	ABETA40	GAIIGLMVGGVV	C49H88N12O13S[M+2H]	GAIIGLMVGGVV(+H2)	543.323	126.12	19458598
GPS01	GPS01_1.raw	N/A	N/A	ABETA40	GAIIGLMVGGVV	C49H88N12O13S[M+2H]	GAIIGLMVGGVV(+H2)	543.323	126.12	32798088
GPS02	GPS02_1.raw	N/A	N/A	ABETA40	GAIIGLMVGGVV	C49H88N12O13S[M+2H]	GAIIGLMVGGVV(+H2)	543.323	126.12	25361356
GPS03	GPS03_1.raw	N/A	N/A	ABETA40	GAIIGLMVGGVV	C49H88N12O13S[M+2H]	GAIIGLMVGGVV(+H2)	543.323	126.12	14497709
GPS04	GPS04_1.raw	N/A	N/A	ABETA40	GAIIGLMVGGVV	C49H88N12O13S[M+2H]	GAIIGLMVGGVV(+H2)	543.323	126.12	12250046
GPS05	GPS_05_01.raw	N/A	N/A	ABETA40	GAIIGLMVGGVV	C49H88N12O13S[M+2H]	GAIIGLMVGGVV(+H2)	543.323	126.12	4556031
GPS06	GPS_06_01.raw	N/A	N/A	ABETA40	GAIIGLMVGGVV	C49H88N12O13S[M+2H]	GAIIGLMVGGVV(+H2)	543.323	126.12	1517659
1_1	1_1_01.raw	N/A	N/A	ABETA40	GAIIGLMVGGVV	C49H88N12O13S[M+2H]	GAIIGLMVGGVV(+H2)	543.323	126.12	58311512
1_2	1_2_01.raw	N/A	N/A	ABETA40	GAIIGLMVGGVV	C49H88N12O13S[M+2H]	GAIIGLMVGGVV(+H2)	543.323	126.12	265317088
1_3	1_3_01.raw	N/A	N/A	ABETA40	GAIIGLMVGGVV	C49H88N12O13S[M+2H]	GAIIGLMVGGVV(+H2)	543.323	126.12	15467594
2_1	2_1_01.raw	N/A	N/A	ABETA40	GAIIGLMVGGVV	C49H88N12O13S[M+2H]	GAIIGLMVGGVV(+H2)	543.323	126.12	26251716
2_2	2_2_01.raw	N/A	N/A	ABETA40	GAIIGLMVGGVV	C49H88N12O13S[M+2H]	GAIIGLMVGGVV(+H2)	543.323	126.12	1886532
2_3	2_3_01.raw	N/A	N/A	ABETA40	GAIIGLMVGGVV	C49H88N12O13S[M+2H]	GAIIGLMVGGVV(+H2)	543.323	126.12	96289696
3_1	3_1_01.raw	N/A	N/A	ABETA40	GAIIGLMVGGVV	C49H88N12O13S[M+2H]	GAIIGLMVGGVV(+H2)	543.323	126.12	179042
3_2	3_2_01_171223210221.raw	N/A	N/A	ABETA40	GAIIGLMVGGVV	C49H88N12O13S[M+2H]	GAIIGLMVGGVV(+H2)	543.323	126.12	27573768
3_3	3_3_01.raw	N/A	N/A	ABETA40	GAIIGLMVGGVV	C49H88N12O13S[M+2H]	GAIIGLMVGGVV(+H2)	543.323	126.12	1320589
4_1	4_1_01.raw	N/A	N/A	ABETA40	GAIIGLMVGGVV	C49H88N12O13S[M+2H]	GAIIGLMVGGVV(+H2)	543.323	126.12	4668598
4_2	4_2_01.raw	N/A	N/A	ABETA40	GAIIGLMVGGVV	C49H88N12O13S[M+2H]	GAIIGLMVGGVV(+H2)	543.323	126.12	32517538
4_3	4_3_01.raw	N/A	N/A	ABETA40	GAIIGLMVGGVV	C49H88N12O13S[M+2H]	GAIIGLMVGGVV(+H2)	543.323	126.12	11063300
1_4	1_4_01.raw	N/A	N/A	ABETA40	GAIIGLMVGGVV	C49H88N12O13S[M+2H]	GAIIGLMVGGVV(+H2)	543.323	126.12	222122
1_5	1_5_01.raw	N/A	N/A	ABETA40	GAIIGLMVGGVV	C49H88N12O13S[M+2H]	GAIIGLMVGGVV(+H2)	543.323	126.12	102219
1_6	1_6_01.raw	N/A	N/A	ABETA40	GAIIGLMVGGVV	C49H88N12O13S[M+2H]	GAIIGLMVGGVV(+H2)	543.323	126.12	693654
2_4	2_4_01.raw	N/A	N/A	ABETA40	GAIIGLMVGGVV	C49H88N12O13S[M+2H]	GAIIGLMVGGVV(+H2)	543.323	126.12	340836
2_5	2_5_01.raw	N/A	N/A	ABETA40	GAIIGLMVGGVV	C49H88N12O13S[M+2H]	GAIIGLMVGGVV(+H2)	543.323	126.12	1112075
2_6	2_6_01.raw	N/A	N/A	ABETA40	GAIIGLMVGGVV	C49H88N12O13S[M+2H]	GAIIGLMVGGVV(+H2)	543.323	126.12	215415
3_4	3_4_01.raw	N/A	N/A	ABETA40	GAIIGLMVGGVV	C49H88N12O13S[M+2H]	GAIIGLMVGGVV(+H2)	543.323	126.12	183186
3_5	3_5_01.raw	N/A	N/A	ABETA40	GAIIGLMVGGVV	C49H88N12O13S[M+2H]	GAIIGLMVGGVV(+H2)	543.323	126.12	115479
3_6	3_6_01.raw	N/A	N/A	ABETA40	GAIIGLMVGGVV	C49H88N12O13S[M+2H]	GAIIGLMVGGVV(+H2)	543.323	126.12	111226
4_4	4_4_01.raw	N/A	N/A	ABETA40	GAIIGLMVGGVV	C49H88N12O13S[M+2H]	GAIIGLMVGGVV(+H2)	543.323	126.12	753314
4_5	4_5_01.raw	N/A	N/A	ABETA40	GAIIGLMVGGVV	C49H88N12O13S[M+2H]	GAIIGLMVGGVV(+H2)	543.323	126.12	291899
4_6	4_6_01.raw	N/A	N/A	ABETA40	GAIIGLMVGGVV	C49H88N12O13S[M+2H]	GAIIGLMVGGVV(+H2)	543.323	126.12	521127
1_7	1_7_01.raw	N/A	N/A	ABETA40	GAIIGLMVGGVV	C49H88N12O13S[M+2H]	GAIIGLMVGGVV(+H2)	543.323	126.12	63879
1_8	1_8_01_171211223541.raw	N/A	N/A	ABETA40	GAIIGLMVGGVV	C49H88N12O13S[M+2H]	GAIIGLMVGGVV(+H2)	543.323	126.12	33039
1_9	1_9_01.raw	N/A	N/A	ABETA40	GAIIGLMVGGVV	C49H88N12O13S[M+2H]	GAIIGLMVGGVV(+H2)	543.323	126.12	17481
2_7	2_7_01.raw	N/A	N/A	ABETA40	GAIIGLMVGGVV	C49H88N12O13S[M+2H]	GAIIGLMVGGVV(+H2)	543.323	126.12	99413
2_8	2_8_01.raw	N/A	N/A	ABETA40	GAIIGLMVGGVV	C49H88N12O13S[M+2H]	GAIIGLMVGGVV(+H2)	543.323	126.12	134897
2_9	2_9_01_171217123101.raw	N/A	N/A	ABETA40	GAIIGLMVGGVV	C49H88N12O13S[M+2H]	GAIIGLMVGGVV(+H2)	543.323	126.12	144426
3_7	3_7_01.raw	N/A	N/A	ABETA40	GAIIGLMVGGVV	C49H88N12O13S[M+2H]	GAIIGLMVGGVV(+H2)	543.323	126.12	176467
3_8	3_8_01.raw	N/A	N/A	ABETA40	GAIIGLMVGGVV	C49H88N12O13S[M+2H]	GAIIGLMVGGVV(+H2)	543.323	126.12	200844
3_9	3_9_01.raw	N/A	N/A	ABETA40	GAIIGLMVGGVV	C49H88N12O13S[M+2H]	GAIIGLMVGGVV(+H2)	543.323	126.12	176921
4_7	4_7_01.raw	N/A	N/A	ABETA40	GAIIGLMVGGVV	C49H88N12O13S[M+2H]	GAIIGLMVGGVV(+H2)	543.323	126.12	106201
4_8	4_8_01.raw	N/A	N/A	ABETA40	GAIIGLMVGGVV	C49H88N12O13S[M+2H]	GAIIGLMVGGVV(+H2)	543.323	126.12	231733
4_9	4_9_01.raw	N/A	N/A	ABETA40	GAIIGLMVGGVV	C49H88N12O13S[M+2H]	GAIIGLMVGGVV(+H2)	543.323	126.12	206205
1_10	1_10_01.raw	N/A	N/A	ABETA40	GAIIGLMVGGVV	C49H88N12O13S[M+2H]	GAIIGLMVGGVV(+H2)	543.323	126.12	772618
1_11	1_11_01.raw	N/A	N/A	ABETA40	GAIIGLMVGGVV	C49H88N12O13S[M+2H]	GAIIGLMVGGVV(+H2)	543.323	126.12	58540564
1_12	1_12_01.raw	N/A	N/A	ABETA40	GAIIGLMVGGVV	C49H88N12O13S[M+2H]	GAIIGLMVGGVV(+H2)	543.323	126.12	6822775
2_10	2_10_01.raw	N/A	N/A	ABETA40	GAIIGLMVGGVV	C49H88N12O13S[M+2H]	GAIIGLMVGGVV(+H2)	543.323	126.12	25599502
2_11	2_11_01_171223040132.raw	N/A	N/A	ABETA40	GAIIGLMVGGVV	C49H88N12O13S[M+2H]	GAIIGLMVGGVV(+H2)	543.323	126.12	2525233
2_12	2_12_01.raw	N/A	N/A	ABETA40	GAIIGLMVGGVV	C49H88N12O13S[M+2H]	GAIIGLMVGGVV(+H2)	543.323	126.12	99020
3_10	3_10_01.raw	N/A	N/A	ABETA40	GAIIGLMVGGVV	C49H88N12O13S[M+2H]	GAIIGLMVGGVV(+H2)	543.323	126.12	341727
3_11	3_11_01.raw	N/A	N/A	ABETA40	GAIIGLMVGGVV	C49H88N12O13S[M+2H]	GAIIGLMVGGVV(+H2)	543.323	126.12	712848
Chromatograms	FinalList2_1.raw	N/A	N/A	ABETA42	GAIIGLMVGGVVIA	C58H104N14O15S[M+H]	GAIIGLMVGGVVIA(+H1)	1269.76	138.88	18575
GPS01	GPS01_2.raw	N/A	N/A	ABETA42	GAIIGLMVGGVVIA	C58H104N14O15S[M+H]	GAIIGLMVGGVVIA(+H1)	1269.76	138.88	15944360
GPS02	GPS02_2.raw	N/A	N/A	ABETA42	GAIIGLMVGGVVIA	C58H104N14O15S[M+H]	GAIIGLMVGGVVIA(+H1)	1269.76	138.88	5188760
GPS03	GPS03_2.raw	N/A	N/A	ABETA42	GAIIGLMVGGVVIA	C58H104N14O15S[M+H]	GAIIGLMVGGVVIA(+H1)	1269.76	138.88	5881068
GPS04	GPS04_2.raw	N/A	N/A	ABETA42	GAIIGLMVGGVVIA	C58H104N14O15S[M+H]	GAIIGLMVGGVVIA(+H1)	1269.76	138.88	12535945
GPS05	GPS_05_02.raw	N/A	N/A	ABETA42	GAIIGLMVGGVVIA	C58H104N14O15S[M+H]	GAIIGLMVGGVVIA(+H1)	1269.76	138.88	15234830
GPS06	GPS_06_02.raw	N/A	N/A	ABETA42	GAIIGLMVGGVVIA	C58H104N14O15S[M+H]	GAIIGLMVGGVVIA(+H1)	1269.76	138.88	4742513
1_1	1_1_02.raw	N/A	N/A	ABETA42	GAIIGLMVGGVVIA	C58H104N14O15S[M+H]	GAIIGLMVGGVVIA(+H1)	1269.76	138.88	27286884
1_2	1_2_02.raw	N/A	N/A	ABETA42	GAIIGLMVGGVVIA	C58H104N14O15S[M+H]	GAIIGLMVGGVVIA(+H1)	1269.76	138.88	30657192
1_3	1_3_02.raw	N/A	N/A	ABETA42	GAIIGLMVGGVVIA	C58H104N14O15S[M+H]	GAIIGLMVGGVVIA(+H1)	1269.76	138.88	13524090
2_1	2_1_02.raw	N/A	N/A	ABETA42	GAIIGLMVGGVVIA	C58H104N14O15S[M+H]	GAIIGLMVGGVVIA(+H1)	1269.76	138.88	12910258
2_2	2_2_02.raw	N/A	N/A	ABETA42	GAIIGLMVGGVVIA	C58H104N14O15S[M+H]	GAIIGLMVGGVVIA(+H1)	1269.76	138.88	19931098
2_3	2_3_02.raw	N/A	N/A	ABETA42	GAIIGLMVGGVVIA	C58H104N14O15S[M+H]	GAIIGLMVGGVVIA(+H1)	1269.76	138.88	33581320
3_1	3_1_02.raw	N/A	N/A	ABETA42	GAIIGLMVGGVVIA	C58H104N14O15S[M+H]	GAIIGLMVGGVVIA(+H1)	1269.76	138.88	1509296
3_2	3_2_02.raw	N/A	N/A	ABETA42	GAIIGLMVGGVVIA	C58H104N14O15S[M+H]	GAIIGLMVGGVVIA(+H1)	1269.76	138.88	2885019
3_3	3_3_02.raw	N/A	N/A	ABETA42	GAIIGLMVGGVVIA	C58H104N14O15S[M+H]	GAIIGLMVGGVVIA(+H1)	1269.76	138.88	352120
4_1	4_1_02.raw	N/A	N/A	ABETA42	GAIIGLMVGGVVIA	C58H104N14O15S[M+H]	GAIIGLMVGGVVIA(+H1)	1269.76	138.88	30222696
4_2	4_2_02.raw	N/A	N/A	ABETA42	GAIIGLMVGGVVIA	C58H104N14O15S[M+H]	GAIIGLMVGGVVIA(+H1)	1269.76	138.88	22290606
4_3	4_3_02.raw	N/A	N/A	ABETA42	GAIIGLMVGGVVIA	C58H104N14O15S[M+H]	GAIIGLMVGGVVIA(+H1)	1269.76	138.88	23866336
1_4	1_4_02.raw	N/A	N/A	ABETA42	GAIIGLMVGGVVIA	C58H104N14O15S[M+H]	GAIIGLMVGGVVIA(+H1)	1269.76	138.88	44389
1_5	1_5_02.raw	N/A	N/A	ABETA42	GAIIGLMVGGVVIA	C58H104N14O15S[M+H]	GAIIGLMVGGVVIA(+H1)	1269.76	138.88	160275
1_6	1_6_02.raw	N/A	N/A	ABETA42	GAIIGLMVGGVVIA	C58H104N14O15S[M+H]	GAIIGLMVGGVVIA(+H1)	1269.76	138.88	464558
2_4	2_4_02.raw	N/A	N/A	ABETA42	GAIIGLMVGGVVIA	C58H104N14O15S[M+H]	GAIIGLMVGGVVIA(+H1)	1269.76	138.88	565105
2_5	2_5_02.raw	N/A	N/A	ABETA42	GAIIGLMVGGVVIA	C58H104N14O15S[M+H]	GAIIGLMVGGVVIA(+H1)	1269.76	138.88	1037733
2_6	2_6_02.raw	N/A	N/A	ABETA42	GAIIGLMVGGVVIA	C58H104N14O15S[M+H]	GAIIGLMVGGVVIA(+H1)	1269.76	138.88	411632
3_4	3_4_02.raw	N/A	N/A	ABETA42	GAIIGLMVGGVVIA	C58H104N14O15S[M+H]	GAIIGLMVGGVVIA(+H1)	1269.76	138.88	15263
3_5	3_5_02.raw	N/A	N/A	ABETA42	GAIIGLMVGGVVIA	C58H104N14O15S[M+H]	GAIIGLMVGGVVIA(+H1)	1269.76	138.88	11870
3_6	3_6_02.raw	N/A	N/A	ABETA42	GAIIGLMVGGVVIA	C58H104N14O15S[M+H]	GAIIGLMVGGVVIA(+H1)	1269.76	138.88	11466
4_4	4_4_02.raw	N/A	N/A	ABETA42	GAIIGLMVGGVVIA	C58H104N14O15S[M+H]	GAIIGLMVGGVVIA(+H1)	1269.76	138.88	475027
4_5	4_5_02.raw	N/A	N/A	ABETA42	GAIIGLMVGGVVIA	C58H104N14O15S[M+H]	GAIIGLMVGGVVIA(+H1)	1269.76	138.88	2986
4_6	4_6_02.raw	N/A	N/A	ABETA42	GAIIGLMVGGVVIA	C58H104N14O15S[M+H]	GAIIGLMVGGVVIA(+H1)	1269.76	138.88	97976
1_7	1_7_02.raw	N/A	N/A	ABETA42	GAIIGLMVGGVVIA	C58H104N14O15S[M+H]	GAIIGLMVGGVVIA(+H1)	1269.76	138.88	147173
1_8	1_8_02.raw	N/A	N/A	ABETA42	GAIIGLMVGGVVIA	C58H104N14O15S[M+H]	GAIIGLMVGGVVIA(+H1)	1269.76	138.88	27318
1_9	1_9_02.raw	N/A	N/A	ABETA42	GAIIGLMVGGVVIA	C58H104N14O15S[M+H]	GAIIGLMVGGVVIA(+H1)	1269.76	138.88	161201
2_7	2_7_02.raw	N/A	N/A	ABETA42	GAIIGLMVGGVVIA	C58H104N14O15S[M+H]	GAIIGLMVGGVVIA(+H1)	1269.76	138.88	110682
2_8	2_8_02.raw	N/A	N/A	ABETA42	GAIIGLMVGGVVIA	C58H104N14O15S[M+H]	GAIIGLMVGGVVIA(+H1)	1269.76	138.88	149761
2_9	2_9_02_171217160937.raw	N/A	N/A	ABETA42	GAIIGLMVGGVVIA	C58H104N14O15S[M+H]	GAIIGLMVGGVVIA(+H1)	1269.76	138.88	323024
3_7	3_7_02.raw	N/A	N/A	ABETA42	GAIIGLMVGGVVIA	C58H104N14O15S[M+H]	GAIIGLMVGGVVIA(+H1)	1269.76	138.88	23911
3_8	3_8_02.raw	N/A	N/A	ABETA42	GAIIGLMVGGVVIA	C58H104N14O15S[M+H]	GAIIGLMVGGVVIA(+H1)	1269.76	138.88	7122
3_9	3_9_02.raw	N/A	N/A	ABETA42	GAIIGLMVGGVVIA	C58H104N14O15S[M+H]	GAIIGLMVGGVVIA(+H1)	1269.76	138.88	91940
4_7	4_7_02.raw	N/A	N/A	ABETA42	GAIIGLMVGGVVIA	C58H104N14O15S[M+H]	GAIIGLMVGGVVIA(+H1)	1269.76	138.88	53241
4_8	4_8_02.raw	N/A	N/A	ABETA42	GAIIGLMVGGVVIA	C58H104N14O15S[M+H]	GAIIGLMVGGVVIA(+H1)	1269.76	138.88	56650
4_9	4_9_02.raw	N/A	N/A	ABETA42	GAIIGLMVGGVVIA	C58H104N14O15S[M+H]	GAIIGLMVGGVVIA(+H1)	1269.76	138.88	182317
1_10	1_10_02.raw	N/A	N/A	ABETA42	GAIIGLMVGGVVIA	C58H104N14O15S[M+H]	GAIIGLMVGGVVIA(+H1)	1269.76	138.88	908064
1_11	1_11_02.raw	N/A	N/A	ABETA42	GAIIGLMVGGVVIA	C58H104N14O15S[M+H]	GAIIGLMVGGVVIA(+H1)	1269.76	138.88	6329439
1_12	1_12_02.raw	N/A	N/A	ABETA42	GAIIGLMVGGVVIA	C58H104N14O15S[M+H]	GAIIGLMVGGVVIA(+H1)	1269.76	138.88	3062090
2_10	2_10_02.raw	N/A	N/A	ABETA42	GAIIGLMVGGVVIA	C58H104N14O15S[M+H]	GAIIGLMVGGVVIA(+H1)	1269.76	138.88	15317791
2_11	2_11_02.raw	N/A	N/A	ABETA42	GAIIGLMVGGVVIA	C58H104N14O15S[M+H]	GAIIGLMVGGVVIA(+H1)	1269.76	138.88	676128
2_12	2_12_02.raw	N/A	N/A	ABETA42	GAIIGLMVGGVVIA	C58H104N14O15S[M+H]	GAIIGLMVGGVVIA(+H1)	1269.76	138.88	327882
3_10	3_10_02.raw	N/A	N/A	ABETA42	GAIIGLMVGGVVIA	C58H104N14O15S[M+H]	GAIIGLMVGGVVIA(+H1)	1269.76	138.88	2974952
3_11	3_11_02.raw	N/A	N/A	ABETA42	GAIIGLMVGGVVIA	C58H104N14O15S[M+H]	GAIIGLMVGGVVIA(+H1)	1269.76	138.88	395056
Chromatograms	FinalList2_2.raw	N/A	N/A	ABETA42	GAIIGLMVGGVVIA	C58H104N14O15S[M+2H]	GAIIGLMVGGVVIA(+H2)	635.384	138.88	3647871
GPS01	GPS01_1.raw	N/A	N/A	ABETA42	GAIIGLMVGGVVIA	C58H104N14O15S[M+2H]	GAIIGLMVGGVVIA(+H2)	635.384	138.88	73081056
GPS02	GPS02_1.raw	N/A	N/A	ABETA42	GAIIGLMVGGVVIA	C58H104N14O15S[M+2H]	GAIIGLMVGGVVIA(+H2)	635.384	138.88	44296424
GPS03	GPS03_1.raw	N/A	N/A	ABETA42	GAIIGLMVGGVVIA	C58H104N14O15S[M+2H]	GAIIGLMVGGVVIA(+H2)	635.384	138.88	35370448
GPS04	GPS04_1.raw	N/A	N/A	ABETA42	GAIIGLMVGGVVIA	C58H104N14O15S[M+2H]	GAIIGLMVGGVVIA(+H2)	635.384	138.88	30898984
GPS05	GPS_05_01.raw	N/A	N/A	ABETA42	GAIIGLMVGGVVIA	C58H104N14O15S[M+2H]	GAIIGLMVGGVVIA(+H2)	635.384	138.88	62814340
GPS06	GPS_06_01.raw	N/A	N/A	ABETA42	GAIIGLMVGGVVIA	C58H104N14O15S[M+2H]	GAIIGLMVGGVVIA(+H2)	635.384	138.88	25880116
1_1	1_1_01.raw	N/A	N/A	ABETA42	GAIIGLMVGGVVIA	C58H104N14O15S[M+2H]	GAIIGLMVGGVVIA(+H2)	635.384	138.88	99492608
1_2	1_2_01.raw	N/A	N/A	ABETA42	GAIIGLMVGGVVIA	C58H104N14O15S[M+2H]	GAIIGLMVGGVVIA(+H2)	635.384	138.88	161720400
1_3	1_3_01.raw	N/A	N/A	ABETA42	GAIIGLMVGGVVIA	C58H104N14O15S[M+2H]	GAIIGLMVGGVVIA(+H2)	635.384	138.88	86794480
2_1	2_1_01.raw	N/A	N/A	ABETA42	GAIIGLMVGGVVIA	C58H104N14O15S[M+2H]	GAIIGLMVGGVVIA(+H2)	635.384	138.88	81351696
2_2	2_2_01.raw	N/A	N/A	ABETA42	GAIIGLMVGGVVIA	C58H104N14O15S[M+2H]	GAIIGLMVGGVVIA(+H2)	635.384	138.88	72880384
2_3	2_3_01.raw	N/A	N/A	ABETA42	GAIIGLMVGGVVIA	C58H104N14O15S[M+2H]	GAIIGLMVGGVVIA(+H2)	635.384	138.88	112057448
3_1	3_1_01.raw	N/A	N/A	ABETA42	GAIIGLMVGGVVIA	C58H104N14O15S[M+2H]	GAIIGLMVGGVVIA(+H2)	635.384	138.88	33636720
3_2	3_2_01_171223210221.raw	N/A	N/A	ABETA42	GAIIGLMVGGVVIA	C58H104N14O15S[M+2H]	GAIIGLMVGGVVIA(+H2)	635.384	138.88	19277854
3_3	3_3_01.raw	N/A	N/A	ABETA42	GAIIGLMVGGVVIA	C58H104N14O15S[M+2H]	GAIIGLMVGGVVIA(+H2)	635.384	138.88	8395589
4_1	4_1_01.raw	N/A	N/A	ABETA42	GAIIGLMVGGVVIA	C58H104N14O15S[M+2H]	GAIIGLMVGGVVIA(+H2)	635.384	138.88	5447960
4_2	4_2_01.raw	N/A	N/A	ABETA42	GAIIGLMVGGVVIA	C58H104N14O15S[M+2H]	GAIIGLMVGGVVIA(+H2)	635.384	138.88	133682704
4_3	4_3_01.raw	N/A	N/A	ABETA42	GAIIGLMVGGVVIA	C58H104N14O15S[M+2H]	GAIIGLMVGGVVIA(+H2)	635.384	138.88	137754960
1_4	1_4_01.raw	N/A	N/A	ABETA42	GAIIGLMVGGVVIA	C58H104N14O15S[M+2H]	GAIIGLMVGGVVIA(+H2)	635.384	138.88	3037411
1_5	1_5_01.raw	N/A	N/A	ABETA42	GAIIGLMVGGVVIA	C58H104N14O15S[M+2H]	GAIIGLMVGGVVIA(+H2)	635.384	138.88	910380
1_6	1_6_01.raw	N/A	N/A	ABETA42	GAIIGLMVGGVVIA	C58H104N14O15S[M+2H]	GAIIGLMVGGVVIA(+H2)	635.384	138.88	6538260
2_4	2_4_01.raw	N/A	N/A	ABETA42	GAIIGLMVGGVVIA	C58H104N14O15S[M+2H]	GAIIGLMVGGVVIA(+H2)	635.384	138.88	2538900
2_5	2_5_01.raw	N/A	N/A	ABETA42	GAIIGLMVGGVVIA	C58H104N14O15S[M+2H]	GAIIGLMVGGVVIA(+H2)	635.384	138.88	8938329
2_6	2_6_01.raw	N/A	N/A	ABETA42	GAIIGLMVGGVVIA	C58H104N14O15S[M+2H]	GAIIGLMVGGVVIA(+H2)	635.384	138.88	1968380
3_4	3_4_01.raw	N/A	N/A	ABETA42	GAIIGLMVGGVVIA	C58H104N14O15S[M+2H]	GAIIGLMVGGVVIA(+H2)	635.384	138.88	419494
3_5	3_5_01.raw	N/A	N/A	ABETA42	GAIIGLMVGGVVIA	C58H104N14O15S[M+2H]	GAIIGLMVGGVVIA(+H2)	635.384	138.88	138869
3_6	3_6_01.raw	N/A	N/A	ABETA42	GAIIGLMVGGVVIA	C58H104N14O15S[M+2H]	GAIIGLMVGGVVIA(+H2)	635.384	138.88	932026
4_4	4_4_01.raw	N/A	N/A	ABETA42	GAIIGLMVGGVVIA	C58H104N14O15S[M+2H]	GAIIGLMVGGVVIA(+H2)	635.384	138.88	4130035
4_5	4_5_01.raw	N/A	N/A	ABETA42	GAIIGLMVGGVVIA	C58H104N14O15S[M+2H]	GAIIGLMVGGVVIA(+H2)	635.384	138.88	1827781
4_6	4_6_01.raw	N/A	N/A	ABETA42	GAIIGLMVGGVVIA	C58H104N14O15S[M+2H]	GAIIGLMVGGVVIA(+H2)	635.384	138.88	18098464
1_7	1_7_01.raw	N/A	N/A	ABETA42	GAIIGLMVGGVVIA	C58H104N14O15S[M+2H]	GAIIGLMVGGVVIA(+H2)	635.384	138.88	1579887
1_8	1_8_01_171211223541.raw	N/A	N/A	ABETA42	GAIIGLMVGGVVIA	C58H104N14O15S[M+2H]	GAIIGLMVGGVVIA(+H2)	635.384	138.88	313697
1_9	1_9_01.raw	N/A	N/A	ABETA42	GAIIGLMVGGVVIA	C58H104N14O15S[M+2H]	GAIIGLMVGGVVIA(+H2)	635.384	138.88	907057
2_7	2_7_01.raw	N/A	N/A	ABETA42	GAIIGLMVGGVVIA	C58H104N14O15S[M+2H]	GAIIGLMVGGVVIA(+H2)	635.384	138.88	1613855
2_8	2_8_01.raw	N/A	N/A	ABETA42	GAIIGLMVGGVVIA	C58H104N14O15S[M+2H]	GAIIGLMVGGVVIA(+H2)	635.384	138.88	1587447
2_9	2_9_01_171217123101.raw	N/A	N/A	ABETA42	GAIIGLMVGGVVIA	C58H104N14O15S[M+2H]	GAIIGLMVGGVVIA(+H2)	635.384	138.88	2415405
3_7	3_7_01.raw	N/A	N/A	ABETA42	GAIIGLMVGGVVIA	C58H104N14O15S[M+2H]	GAIIGLMVGGVVIA(+H2)	635.384	138.88	547510
3_8	3_8_01.raw	N/A	N/A	ABETA42	GAIIGLMVGGVVIA	C58H104N14O15S[M+2H]	GAIIGLMVGGVVIA(+H2)	635.384	138.88	622507
3_9	3_9_01.raw	N/A	N/A	ABETA42	GAIIGLMVGGVVIA	C58H104N14O15S[M+2H]	GAIIGLMVGGVVIA(+H2)	635.384	138.88	1270069
4_7	4_7_01.raw	N/A	N/A	ABETA42	GAIIGLMVGGVVIA	C58H104N14O15S[M+2H]	GAIIGLMVGGVVIA(+H2)	635.384	138.88	3981815
4_8	4_8_01.raw	N/A	N/A	ABETA42	GAIIGLMVGGVVIA	C58H104N14O15S[M+2H]	GAIIGLMVGGVVIA(+H2)	635.384	138.88	1139955
4_9	4_9_01.raw	N/A	N/A	ABETA42	GAIIGLMVGGVVIA	C58H104N14O15S[M+2H]	GAIIGLMVGGVVIA(+H2)	635.384	138.88	1408747
1_10	1_10_01.raw	N/A	N/A	ABETA42	GAIIGLMVGGVVIA	C58H104N14O15S[M+2H]	GAIIGLMVGGVVIA(+H2)	635.384	138.88	16865354
1_11	1_11_01.raw	N/A	N/A	ABETA42	GAIIGLMVGGVVIA	C58H104N14O15S[M+2H]	GAIIGLMVGGVVIA(+H2)	635.384	138.88	49702992
1_12	1_12_01.raw	N/A	N/A	ABETA42	GAIIGLMVGGVVIA	C58H104N14O15S[M+2H]	GAIIGLMVGGVVIA(+H2)	635.384	138.88	44650936
2_10	2_10_01.raw	N/A	N/A	ABETA42	GAIIGLMVGGVVIA	C58H104N14O15S[M+2H]	GAIIGLMVGGVVIA(+H2)	635.384	138.88	80951248
2_11	2_11_01_171223040132.raw	N/A	N/A	ABETA42	GAIIGLMVGGVVIA	C58H104N14O15S[M+2H]	GAIIGLMVGGVVIA(+H2)	635.384	138.88	16102388
2_12	2_12_01.raw	N/A	N/A	ABETA42	GAIIGLMVGGVVIA	C58H104N14O15S[M+2H]	GAIIGLMVGGVVIA(+H2)	635.384	138.88	3018342
3_10	3_10_01.raw	N/A	N/A	ABETA42	GAIIGLMVGGVVIA	C58H104N14O15S[M+2H]	GAIIGLMVGGVVIA(+H2)	635.384	138.88	24824414
3_11	3_11_01.raw	N/A	N/A	ABETA42	GAIIGLMVGGVVIA	C58H104N14O15S[M+2H]	GAIIGLMVGGVVIA(+H2)	635.384	138.88	15966360
Chromatograms	FinalList2_2.raw	sp|Q9UKV3|ACINU_HUMAN	Q9UKV3	ACIN1	TGTLVEEAFWIDK	C70H105N15O22[M+2H]	TGTLVEEAFWIDK(+H2)	754.885	104.6	1963430
GPS01	GPS01_2.raw	sp|Q9UKV3|ACINU_HUMAN	Q9UKV3	ACIN1	TGTLVEEAFWIDK	C70H105N15O22[M+2H]	TGTLVEEAFWIDK(+H2)	754.885	104.6	2245409
GPS02	GPS02_2.raw	sp|Q9UKV3|ACINU_HUMAN	Q9UKV3	ACIN1	TGTLVEEAFWIDK	C70H105N15O22[M+2H]	TGTLVEEAFWIDK(+H2)	754.885	104.6	1703240
GPS03	GPS03_2.raw	sp|Q9UKV3|ACINU_HUMAN	Q9UKV3	ACIN1	TGTLVEEAFWIDK	C70H105N15O22[M+2H]	TGTLVEEAFWIDK(+H2)	754.885	104.6	1959815
GPS04	GPS04_2.raw	sp|Q9UKV3|ACINU_HUMAN	Q9UKV3	ACIN1	TGTLVEEAFWIDK	C70H105N15O22[M+2H]	TGTLVEEAFWIDK(+H2)	754.885	104.6	1691855
GPS05	GPS_05_02.raw	sp|Q9UKV3|ACINU_HUMAN	Q9UKV3	ACIN1	TGTLVEEAFWIDK	C70H105N15O22[M+2H]	TGTLVEEAFWIDK(+H2)	754.885	104.6	1781805
GPS06	GPS_06_02.raw	sp|Q9UKV3|ACINU_HUMAN	Q9UKV3	ACIN1	TGTLVEEAFWIDK	C70H105N15O22[M+2H]	TGTLVEEAFWIDK(+H2)	754.885	104.6	1528931
1_1	1_1_02.raw	sp|Q9UKV3|ACINU_HUMAN	Q9UKV3	ACIN1	TGTLVEEAFWIDK	C70H105N15O22[M+2H]	TGTLVEEAFWIDK(+H2)	754.885	104.6	1930518
1_2	1_2_02.raw	sp|Q9UKV3|ACINU_HUMAN	Q9UKV3	ACIN1	TGTLVEEAFWIDK	C70H105N15O22[M+2H]	TGTLVEEAFWIDK(+H2)	754.885	104.6	2501243
1_3	1_3_02.raw	sp|Q9UKV3|ACINU_HUMAN	Q9UKV3	ACIN1	TGTLVEEAFWIDK	C70H105N15O22[M+2H]	TGTLVEEAFWIDK(+H2)	754.885	104.6	1145479
2_1	2_1_02.raw	sp|Q9UKV3|ACINU_HUMAN	Q9UKV3	ACIN1	TGTLVEEAFWIDK	C70H105N15O22[M+2H]	TGTLVEEAFWIDK(+H2)	754.885	104.6	3012222
2_2	2_2_02.raw	sp|Q9UKV3|ACINU_HUMAN	Q9UKV3	ACIN1	TGTLVEEAFWIDK	C70H105N15O22[M+2H]	TGTLVEEAFWIDK(+H2)	754.885	104.6	4729615
2_3	2_3_02.raw	sp|Q9UKV3|ACINU_HUMAN	Q9UKV3	ACIN1	TGTLVEEAFWIDK	C70H105N15O22[M+2H]	TGTLVEEAFWIDK(+H2)	754.885	104.6	3781973
3_1	3_1_02.raw	sp|Q9UKV3|ACINU_HUMAN	Q9UKV3	ACIN1	TGTLVEEAFWIDK	C70H105N15O22[M+2H]	TGTLVEEAFWIDK(+H2)	754.885	104.6	1907788
3_2	3_2_02.raw	sp|Q9UKV3|ACINU_HUMAN	Q9UKV3	ACIN1	TGTLVEEAFWIDK	C70H105N15O22[M+2H]	TGTLVEEAFWIDK(+H2)	754.885	104.6	1036576
3_3	3_3_02.raw	sp|Q9UKV3|ACINU_HUMAN	Q9UKV3	ACIN1	TGTLVEEAFWIDK	C70H105N15O22[M+2H]	TGTLVEEAFWIDK(+H2)	754.885	104.6	380834
4_1	4_1_02.raw	sp|Q9UKV3|ACINU_HUMAN	Q9UKV3	ACIN1	TGTLVEEAFWIDK	C70H105N15O22[M+2H]	TGTLVEEAFWIDK(+H2)	754.885	104.6	1862011
4_2	4_2_02.raw	sp|Q9UKV3|ACINU_HUMAN	Q9UKV3	ACIN1	TGTLVEEAFWIDK	C70H105N15O22[M+2H]	TGTLVEEAFWIDK(+H2)	754.885	104.6	1756346
4_3	4_3_02.raw	sp|Q9UKV3|ACINU_HUMAN	Q9UKV3	ACIN1	TGTLVEEAFWIDK	C70H105N15O22[M+2H]	TGTLVEEAFWIDK(+H2)	754.885	104.6	2492081
1_4	1_4_02.raw	sp|Q9UKV3|ACINU_HUMAN	Q9UKV3	ACIN1	TGTLVEEAFWIDK	C70H105N15O22[M+2H]	TGTLVEEAFWIDK(+H2)	754.885	104.6	639692
1_5	1_5_02.raw	sp|Q9UKV3|ACINU_HUMAN	Q9UKV3	ACIN1	TGTLVEEAFWIDK	C70H105N15O22[M+2H]	TGTLVEEAFWIDK(+H2)	754.885	104.6	1094732
1_6	1_6_02.raw	sp|Q9UKV3|ACINU_HUMAN	Q9UKV3	ACIN1	TGTLVEEAFWIDK	C70H105N15O22[M+2H]	TGTLVEEAFWIDK(+H2)	754.885	104.6	1832726
2_4	2_4_02.raw	sp|Q9UKV3|ACINU_HUMAN	Q9UKV3	ACIN1	TGTLVEEAFWIDK	C70H105N15O22[M+2H]	TGTLVEEAFWIDK(+H2)	754.885	104.6	1734623
2_5	2_5_02.raw	sp|Q9UKV3|ACINU_HUMAN	Q9UKV3	ACIN1	TGTLVEEAFWIDK	C70H105N15O22[M+2H]	TGTLVEEAFWIDK(+H2)	754.885	104.6	2001625
2_6	2_6_02.raw	sp|Q9UKV3|ACINU_HUMAN	Q9UKV3	ACIN1	TGTLVEEAFWIDK	C70H105N15O22[M+2H]	TGTLVEEAFWIDK(+H2)	754.885	104.6	2421982
3_4	3_4_02.raw	sp|Q9UKV3|ACINU_HUMAN	Q9UKV3	ACIN1	TGTLVEEAFWIDK	C70H105N15O22[M+2H]	TGTLVEEAFWIDK(+H2)	754.885	104.6	621433
3_5	3_5_02.raw	sp|Q9UKV3|ACINU_HUMAN	Q9UKV3	ACIN1	TGTLVEEAFWIDK	C70H105N15O22[M+2H]	TGTLVEEAFWIDK(+H2)	754.885	104.6	815590
3_6	3_6_02.raw	sp|Q9UKV3|ACINU_HUMAN	Q9UKV3	ACIN1	TGTLVEEAFWIDK	C70H105N15O22[M+2H]	TGTLVEEAFWIDK(+H2)	754.885	104.6	1322761
4_4	4_4_02.raw	sp|Q9UKV3|ACINU_HUMAN	Q9UKV3	ACIN1	TGTLVEEAFWIDK	C70H105N15O22[M+2H]	TGTLVEEAFWIDK(+H2)	754.885	104.6	819538
4_5	4_5_02.raw	sp|Q9UKV3|ACINU_HUMAN	Q9UKV3	ACIN1	TGTLVEEAFWIDK	C70H105N15O22[M+2H]	TGTLVEEAFWIDK(+H2)	754.885	104.6	1610518
4_6	4_6_02.raw	sp|Q9UKV3|ACINU_HUMAN	Q9UKV3	ACIN1	TGTLVEEAFWIDK	C70H105N15O22[M+2H]	TGTLVEEAFWIDK(+H2)	754.885	104.6	1670463
1_7	1_7_02.raw	sp|Q9UKV3|ACINU_HUMAN	Q9UKV3	ACIN1	TGTLVEEAFWIDK	C70H105N15O22[M+2H]	TGTLVEEAFWIDK(+H2)	754.885	104.6	372515
1_8	1_8_02.raw	sp|Q9UKV3|ACINU_HUMAN	Q9UKV3	ACIN1	TGTLVEEAFWIDK	C70H105N15O22[M+2H]	TGTLVEEAFWIDK(+H2)	754.885	104.6	1580108
1_9	1_9_02.raw	sp|Q9UKV3|ACINU_HUMAN	Q9UKV3	ACIN1	TGTLVEEAFWIDK	C70H105N15O22[M+2H]	TGTLVEEAFWIDK(+H2)	754.885	104.6	2416746
2_7	2_7_02.raw	sp|Q9UKV3|ACINU_HUMAN	Q9UKV3	ACIN1	TGTLVEEAFWIDK	C70H105N15O22[M+2H]	TGTLVEEAFWIDK(+H2)	754.885	104.6	3324510
2_8	2_8_02.raw	sp|Q9UKV3|ACINU_HUMAN	Q9UKV3	ACIN1	TGTLVEEAFWIDK	C70H105N15O22[M+2H]	TGTLVEEAFWIDK(+H2)	754.885	104.6	3744433
2_9	2_9_02_171217160937.raw	sp|Q9UKV3|ACINU_HUMAN	Q9UKV3	ACIN1	TGTLVEEAFWIDK	C70H105N15O22[M+2H]	TGTLVEEAFWIDK(+H2)	754.885	104.6	1453128
3_7	3_7_02.raw	sp|Q9UKV3|ACINU_HUMAN	Q9UKV3	ACIN1	TGTLVEEAFWIDK	C70H105N15O22[M+2H]	TGTLVEEAFWIDK(+H2)	754.885	104.6	512081
3_8	3_8_02.raw	sp|Q9UKV3|ACINU_HUMAN	Q9UKV3	ACIN1	TGTLVEEAFWIDK	C70H105N15O22[M+2H]	TGTLVEEAFWIDK(+H2)	754.885	104.6	461025
3_9	3_9_02.raw	sp|Q9UKV3|ACINU_HUMAN	Q9UKV3	ACIN1	TGTLVEEAFWIDK	C70H105N15O22[M+2H]	TGTLVEEAFWIDK(+H2)	754.885	104.6	2400881
4_7	4_7_02.raw	sp|Q9UKV3|ACINU_HUMAN	Q9UKV3	ACIN1	TGTLVEEAFWIDK	C70H105N15O22[M+2H]	TGTLVEEAFWIDK(+H2)	754.885	104.6	955754
4_8	4_8_02.raw	sp|Q9UKV3|ACINU_HUMAN	Q9UKV3	ACIN1	TGTLVEEAFWIDK	C70H105N15O22[M+2H]	TGTLVEEAFWIDK(+H2)	754.885	104.6	25710
4_9	4_9_02.raw	sp|Q9UKV3|ACINU_HUMAN	Q9UKV3	ACIN1	TGTLVEEAFWIDK	C70H105N15O22[M+2H]	TGTLVEEAFWIDK(+H2)	754.885	104.6	1635447
1_10	1_10_02.raw	sp|Q9UKV3|ACINU_HUMAN	Q9UKV3	ACIN1	TGTLVEEAFWIDK	C70H105N15O22[M+2H]	TGTLVEEAFWIDK(+H2)	754.885	104.6	3242879
1_11	1_11_02.raw	sp|Q9UKV3|ACINU_HUMAN	Q9UKV3	ACIN1	TGTLVEEAFWIDK	C70H105N15O22[M+2H]	TGTLVEEAFWIDK(+H2)	754.885	104.6	456905
1_12	1_12_02.raw	sp|Q9UKV3|ACINU_HUMAN	Q9UKV3	ACIN1	TGTLVEEAFWIDK	C70H105N15O22[M+2H]	TGTLVEEAFWIDK(+H2)	754.885	104.6	6286370
2_10	2_10_02.raw	sp|Q9UKV3|ACINU_HUMAN	Q9UKV3	ACIN1	TGTLVEEAFWIDK	C70H105N15O22[M+2H]	TGTLVEEAFWIDK(+H2)	754.885	104.6	4953982
2_11	2_11_02.raw	sp|Q9UKV3|ACINU_HUMAN	Q9UKV3	ACIN1	TGTLVEEAFWIDK	C70H105N15O22[M+2H]	TGTLVEEAFWIDK(+H2)	754.885	104.6	3498543
2_12	2_12_02.raw	sp|Q9UKV3|ACINU_HUMAN	Q9UKV3	ACIN1	TGTLVEEAFWIDK	C70H105N15O22[M+2H]	TGTLVEEAFWIDK(+H2)	754.885	104.6	3968939
3_10	3_10_02.raw	sp|Q9UKV3|ACINU_HUMAN	Q9UKV3	ACIN1	TGTLVEEAFWIDK	C70H105N15O22[M+2H]	TGTLVEEAFWIDK(+H2)	754.885	104.6	952254
3_11	3_11_02.raw	sp|Q9UKV3|ACINU_HUMAN	Q9UKV3	ACIN1	TGTLVEEAFWIDK	C70H105N15O22[M+2H]	TGTLVEEAFWIDK(+H2)	754.885	104.6	1103816
Chromatograms	FinalList2_2.raw	sp|Q9UKV3|ACINU_HUMAN	Q9UKV3	ACIN1	SHC[+57]FVTYSTVEEAVATR	C84H129N23O29S[M+2H]	SHCFVTYSTVEEAVATR(+H2)	978.96	78.99	1734293
GPS01	GPS01_1.raw	sp|Q9UKV3|ACINU_HUMAN	Q9UKV3	ACIN1	SHC[+57]FVTYSTVEEAVATR	C84H129N23O29S[M+2H]	SHCFVTYSTVEEAVATR(+H2)	978.96	78.99	1135053
GPS02	GPS02_1.raw	sp|Q9UKV3|ACINU_HUMAN	Q9UKV3	ACIN1	SHC[+57]FVTYSTVEEAVATR	C84H129N23O29S[M+2H]	SHCFVTYSTVEEAVATR(+H2)	978.96	78.99	829962
GPS03	GPS03_1.raw	sp|Q9UKV3|ACINU_HUMAN	Q9UKV3	ACIN1	SHC[+57]FVTYSTVEEAVATR	C84H129N23O29S[M+2H]	SHCFVTYSTVEEAVATR(+H2)	978.96	78.99	529555
GPS04	GPS04_1.raw	sp|Q9UKV3|ACINU_HUMAN	Q9UKV3	ACIN1	SHC[+57]FVTYSTVEEAVATR	C84H129N23O29S[M+2H]	SHCFVTYSTVEEAVATR(+H2)	978.96	78.99	465256
GPS05	GPS_05_01.raw	sp|Q9UKV3|ACINU_HUMAN	Q9UKV3	ACIN1	SHC[+57]FVTYSTVEEAVATR	C84H129N23O29S[M+2H]	SHCFVTYSTVEEAVATR(+H2)	978.96	78.99	572952
GPS06	GPS_06_01.raw	sp|Q9UKV3|ACINU_HUMAN	Q9UKV3	ACIN1	SHC[+57]FVTYSTVEEAVATR	C84H129N23O29S[M+2H]	SHCFVTYSTVEEAVATR(+H2)	978.96	78.99	412627
1_1	1_1_01.raw	sp|Q9UKV3|ACINU_HUMAN	Q9UKV3	ACIN1	SHC[+57]FVTYSTVEEAVATR	C84H129N23O29S[M+2H]	SHCFVTYSTVEEAVATR(+H2)	978.96	78.99	644039
1_2	1_2_01.raw	sp|Q9UKV3|ACINU_HUMAN	Q9UKV3	ACIN1	SHC[+57]FVTYSTVEEAVATR	C84H129N23O29S[M+2H]	SHCFVTYSTVEEAVATR(+H2)	978.96	78.99	1235269
1_3	1_3_01.raw	sp|Q9UKV3|ACINU_HUMAN	Q9UKV3	ACIN1	SHC[+57]FVTYSTVEEAVATR	C84H129N23O29S[M+2H]	SHCFVTYSTVEEAVATR(+H2)	978.96	78.99	1106847
2_1	2_1_01.raw	sp|Q9UKV3|ACINU_HUMAN	Q9UKV3	ACIN1	SHC[+57]FVTYSTVEEAVATR	C84H129N23O29S[M+2H]	SHCFVTYSTVEEAVATR(+H2)	978.96	78.99	1635702
2_2	2_2_01.raw	sp|Q9UKV3|ACINU_HUMAN	Q9UKV3	ACIN1	SHC[+57]FVTYSTVEEAVATR	C84H129N23O29S[M+2H]	SHCFVTYSTVEEAVATR(+H2)	978.96	78.99	2006767
2_3	2_3_01.raw	sp|Q9UKV3|ACINU_HUMAN	Q9UKV3	ACIN1	SHC[+57]FVTYSTVEEAVATR	C84H129N23O29S[M+2H]	SHCFVTYSTVEEAVATR(+H2)	978.96	78.99	1437622
3_1	3_1_01.raw	sp|Q9UKV3|ACINU_HUMAN	Q9UKV3	ACIN1	SHC[+57]FVTYSTVEEAVATR	C84H129N23O29S[M+2H]	SHCFVTYSTVEEAVATR(+H2)	978.96	78.99	148065
3_2	3_2_01_171223210221.raw	sp|Q9UKV3|ACINU_HUMAN	Q9UKV3	ACIN1	SHC[+57]FVTYSTVEEAVATR	C84H129N23O29S[M+2H]	SHCFVTYSTVEEAVATR(+H2)	978.96	78.99	0
3_3	3_3_01.raw	sp|Q9UKV3|ACINU_HUMAN	Q9UKV3	ACIN1	SHC[+57]FVTYSTVEEAVATR	C84H129N23O29S[M+2H]	SHCFVTYSTVEEAVATR(+H2)	978.96	78.99	58284
4_1	4_1_01.raw	sp|Q9UKV3|ACINU_HUMAN	Q9UKV3	ACIN1	SHC[+57]FVTYSTVEEAVATR	C84H129N23O29S[M+2H]	SHCFVTYSTVEEAVATR(+H2)	978.96	78.99	6902
4_2	4_2_01.raw	sp|Q9UKV3|ACINU_HUMAN	Q9UKV3	ACIN1	SHC[+57]FVTYSTVEEAVATR	C84H129N23O29S[M+2H]	SHCFVTYSTVEEAVATR(+H2)	978.96	78.99	207487
4_3	4_3_01.raw	sp|Q9UKV3|ACINU_HUMAN	Q9UKV3	ACIN1	SHC[+57]FVTYSTVEEAVATR	C84H129N23O29S[M+2H]	SHCFVTYSTVEEAVATR(+H2)	978.96	78.99	395595
1_4	1_4_01.raw	sp|Q9UKV3|ACINU_HUMAN	Q9UKV3	ACIN1	SHC[+57]FVTYSTVEEAVATR	C84H129N23O29S[M+2H]	SHCFVTYSTVEEAVATR(+H2)	978.96	78.99	347524
1_5	1_5_01.raw	sp|Q9UKV3|ACINU_HUMAN	Q9UKV3	ACIN1	SHC[+57]FVTYSTVEEAVATR	C84H129N23O29S[M+2H]	SHCFVTYSTVEEAVATR(+H2)	978.96	78.99	935843
1_6	1_6_01.raw	sp|Q9UKV3|ACINU_HUMAN	Q9UKV3	ACIN1	SHC[+57]FVTYSTVEEAVATR	C84H129N23O29S[M+2H]	SHCFVTYSTVEEAVATR(+H2)	978.96	78.99	1884878
2_4	2_4_01.raw	sp|Q9UKV3|ACINU_HUMAN	Q9UKV3	ACIN1	SHC[+57]FVTYSTVEEAVATR	C84H129N23O29S[M+2H]	SHCFVTYSTVEEAVATR(+H2)	978.96	78.99	717198
2_5	2_5_01.raw	sp|Q9UKV3|ACINU_HUMAN	Q9UKV3	ACIN1	SHC[+57]FVTYSTVEEAVATR	C84H129N23O29S[M+2H]	SHCFVTYSTVEEAVATR(+H2)	978.96	78.99	913200
2_6	2_6_01.raw	sp|Q9UKV3|ACINU_HUMAN	Q9UKV3	ACIN1	SHC[+57]FVTYSTVEEAVATR	C84H129N23O29S[M+2H]	SHCFVTYSTVEEAVATR(+H2)	978.96	78.99	916378
3_4	3_4_01.raw	sp|Q9UKV3|ACINU_HUMAN	Q9UKV3	ACIN1	SHC[+57]FVTYSTVEEAVATR	C84H129N23O29S[M+2H]	SHCFVTYSTVEEAVATR(+H2)	978.96	78.99	220341
3_5	3_5_01.raw	sp|Q9UKV3|ACINU_HUMAN	Q9UKV3	ACIN1	SHC[+57]FVTYSTVEEAVATR	C84H129N23O29S[M+2H]	SHCFVTYSTVEEAVATR(+H2)	978.96	78.99	176915
3_6	3_6_01.raw	sp|Q9UKV3|ACINU_HUMAN	Q9UKV3	ACIN1	SHC[+57]FVTYSTVEEAVATR	C84H129N23O29S[M+2H]	SHCFVTYSTVEEAVATR(+H2)	978.96	78.99	41567
4_4	4_4_01.raw	sp|Q9UKV3|ACINU_HUMAN	Q9UKV3	ACIN1	SHC[+57]FVTYSTVEEAVATR	C84H129N23O29S[M+2H]	SHCFVTYSTVEEAVATR(+H2)	978.96	78.99	3722
4_5	4_5_01.raw	sp|Q9UKV3|ACINU_HUMAN	Q9UKV3	ACIN1	SHC[+57]FVTYSTVEEAVATR	C84H129N23O29S[M+2H]	SHCFVTYSTVEEAVATR(+H2)	978.96	78.99	377915
4_6	4_6_01.raw	sp|Q9UKV3|ACINU_HUMAN	Q9UKV3	ACIN1	SHC[+57]FVTYSTVEEAVATR	C84H129N23O29S[M+2H]	SHCFVTYSTVEEAVATR(+H2)	978.96	78.99	288010
1_7	1_7_01.raw	sp|Q9UKV3|ACINU_HUMAN	Q9UKV3	ACIN1	SHC[+57]FVTYSTVEEAVATR	C84H129N23O29S[M+2H]	SHCFVTYSTVEEAVATR(+H2)	978.96	78.99	158306
1_8	1_8_01_171211223541.raw	sp|Q9UKV3|ACINU_HUMAN	Q9UKV3	ACIN1	SHC[+57]FVTYSTVEEAVATR	C84H129N23O29S[M+2H]	SHCFVTYSTVEEAVATR(+H2)	978.96	78.99	454515
1_9	1_9_01.raw	sp|Q9UKV3|ACINU_HUMAN	Q9UKV3	ACIN1	SHC[+57]FVTYSTVEEAVATR	C84H129N23O29S[M+2H]	SHCFVTYSTVEEAVATR(+H2)	978.96	78.99	881302
2_7	2_7_01.raw	sp|Q9UKV3|ACINU_HUMAN	Q9UKV3	ACIN1	SHC[+57]FVTYSTVEEAVATR	C84H129N23O29S[M+2H]	SHCFVTYSTVEEAVATR(+H2)	978.96	78.99	1098083
2_8	2_8_01.raw	sp|Q9UKV3|ACINU_HUMAN	Q9UKV3	ACIN1	SHC[+57]FVTYSTVEEAVATR	C84H129N23O29S[M+2H]	SHCFVTYSTVEEAVATR(+H2)	978.96	78.99	1124614
2_9	2_9_01_171217123101.raw	sp|Q9UKV3|ACINU_HUMAN	Q9UKV3	ACIN1	SHC[+57]FVTYSTVEEAVATR	C84H129N23O29S[M+2H]	SHCFVTYSTVEEAVATR(+H2)	978.96	78.99	435797
3_7	3_7_01.raw	sp|Q9UKV3|ACINU_HUMAN	Q9UKV3	ACIN1	SHC[+57]FVTYSTVEEAVATR	C84H129N23O29S[M+2H]	SHCFVTYSTVEEAVATR(+H2)	978.96	78.99	4219
3_8	3_8_01.raw	sp|Q9UKV3|ACINU_HUMAN	Q9UKV3	ACIN1	SHC[+57]FVTYSTVEEAVATR	C84H129N23O29S[M+2H]	SHCFVTYSTVEEAVATR(+H2)	978.96	78.99	121982
3_9	3_9_01.raw	sp|Q9UKV3|ACINU_HUMAN	Q9UKV3	ACIN1	SHC[+57]FVTYSTVEEAVATR	C84H129N23O29S[M+2H]	SHCFVTYSTVEEAVATR(+H2)	978.96	78.99	564860
4_7	4_7_01.raw	sp|Q9UKV3|ACINU_HUMAN	Q9UKV3	ACIN1	SHC[+57]FVTYSTVEEAVATR	C84H129N23O29S[M+2H]	SHCFVTYSTVEEAVATR(+H2)	978.96	78.99	315945
4_8	4_8_01.raw	sp|Q9UKV3|ACINU_HUMAN	Q9UKV3	ACIN1	SHC[+57]FVTYSTVEEAVATR	C84H129N23O29S[M+2H]	SHCFVTYSTVEEAVATR(+H2)	978.96	78.99	172935
4_9	4_9_01.raw	sp|Q9UKV3|ACINU_HUMAN	Q9UKV3	ACIN1	SHC[+57]FVTYSTVEEAVATR	C84H129N23O29S[M+2H]	SHCFVTYSTVEEAVATR(+H2)	978.96	78.99	337555
1_10	1_10_01.raw	sp|Q9UKV3|ACINU_HUMAN	Q9UKV3	ACIN1	SHC[+57]FVTYSTVEEAVATR	C84H129N23O29S[M+2H]	SHCFVTYSTVEEAVATR(+H2)	978.96	78.99	1434406
1_11	1_11_01.raw	sp|Q9UKV3|ACINU_HUMAN	Q9UKV3	ACIN1	SHC[+57]FVTYSTVEEAVATR	C84H129N23O29S[M+2H]	SHCFVTYSTVEEAVATR(+H2)	978.96	78.99	189944
1_12	1_12_01.raw	sp|Q9UKV3|ACINU_HUMAN	Q9UKV3	ACIN1	SHC[+57]FVTYSTVEEAVATR	C84H129N23O29S[M+2H]	SHCFVTYSTVEEAVATR(+H2)	978.96	78.99	2380223
2_10	2_10_01.raw	sp|Q9UKV3|ACINU_HUMAN	Q9UKV3	ACIN1	SHC[+57]FVTYSTVEEAVATR	C84H129N23O29S[M+2H]	SHCFVTYSTVEEAVATR(+H2)	978.96	78.99	1859364
2_11	2_11_01_171223040132.raw	sp|Q9UKV3|ACINU_HUMAN	Q9UKV3	ACIN1	SHC[+57]FVTYSTVEEAVATR	C84H129N23O29S[M+2H]	SHCFVTYSTVEEAVATR(+H2)	978.96	78.99	673683
2_12	2_12_01.raw	sp|Q9UKV3|ACINU_HUMAN	Q9UKV3	ACIN1	SHC[+57]FVTYSTVEEAVATR	C84H129N23O29S[M+2H]	SHCFVTYSTVEEAVATR(+H2)	978.96	78.99	1160643
3_10	3_10_01.raw	sp|Q9UKV3|ACINU_HUMAN	Q9UKV3	ACIN1	SHC[+57]FVTYSTVEEAVATR	C84H129N23O29S[M+2H]	SHCFVTYSTVEEAVATR(+H2)	978.96	78.99	88047
3_11	3_11_01.raw	sp|Q9UKV3|ACINU_HUMAN	Q9UKV3	ACIN1	SHC[+57]FVTYSTVEEAVATR	C84H129N23O29S[M+2H]	SHCFVTYSTVEEAVATR(+H2)	978.96	78.99	235903
Chromatograms	FinalList2_1.raw	sp|Q9UKV3|ACINU_HUMAN	Q9UKV3	ACIN1	TALHGVK	C32H56N10O9[M+2H]	TALHGVK(+H2)	363.219	36.2	829685
GPS01	GPS01_1.raw	sp|Q9UKV3|ACINU_HUMAN	Q9UKV3	ACIN1	TALHGVK	C32H56N10O9[M+2H]	TALHGVK(+H2)	363.219	36.2	2459104
GPS02	GPS02_1.raw	sp|Q9UKV3|ACINU_HUMAN	Q9UKV3	ACIN1	TALHGVK	C32H56N10O9[M+2H]	TALHGVK(+H2)	363.219	36.2	2163404
GPS03	GPS03_1.raw	sp|Q9UKV3|ACINU_HUMAN	Q9UKV3	ACIN1	TALHGVK	C32H56N10O9[M+2H]	TALHGVK(+H2)	363.219	36.2	1637013
GPS04	GPS04_1.raw	sp|Q9UKV3|ACINU_HUMAN	Q9UKV3	ACIN1	TALHGVK	C32H56N10O9[M+2H]	TALHGVK(+H2)	363.219	36.2	1550033
GPS05	GPS_05_01.raw	sp|Q9UKV3|ACINU_HUMAN	Q9UKV3	ACIN1	TALHGVK	C32H56N10O9[M+2H]	TALHGVK(+H2)	363.219	36.2	1406706
GPS06	GPS_06_01.raw	sp|Q9UKV3|ACINU_HUMAN	Q9UKV3	ACIN1	TALHGVK	C32H56N10O9[M+2H]	TALHGVK(+H2)	363.219	36.2	894542
1_1	1_1_01.raw	sp|Q9UKV3|ACINU_HUMAN	Q9UKV3	ACIN1	TALHGVK	C32H56N10O9[M+2H]	TALHGVK(+H2)	363.219	36.2	1758880
1_2	1_2_01.raw	sp|Q9UKV3|ACINU_HUMAN	Q9UKV3	ACIN1	TALHGVK	C32H56N10O9[M+2H]	TALHGVK(+H2)	363.219	36.2	3556831
1_3	1_3_01.raw	sp|Q9UKV3|ACINU_HUMAN	Q9UKV3	ACIN1	TALHGVK	C32H56N10O9[M+2H]	TALHGVK(+H2)	363.219	36.2	1727130
2_1	2_1_01.raw	sp|Q9UKV3|ACINU_HUMAN	Q9UKV3	ACIN1	TALHGVK	C32H56N10O9[M+2H]	TALHGVK(+H2)	363.219	36.2	3291578
2_2	2_2_01.raw	sp|Q9UKV3|ACINU_HUMAN	Q9UKV3	ACIN1	TALHGVK	C32H56N10O9[M+2H]	TALHGVK(+H2)	363.219	36.2	3186629
2_3	2_3_01.raw	sp|Q9UKV3|ACINU_HUMAN	Q9UKV3	ACIN1	TALHGVK	C32H56N10O9[M+2H]	TALHGVK(+H2)	363.219	36.2	3290021
3_1	3_1_01.raw	sp|Q9UKV3|ACINU_HUMAN	Q9UKV3	ACIN1	TALHGVK	C32H56N10O9[M+2H]	TALHGVK(+H2)	363.219	36.2	2272687
3_2	3_2_01_171223210221.raw	sp|Q9UKV3|ACINU_HUMAN	Q9UKV3	ACIN1	TALHGVK	C32H56N10O9[M+2H]	TALHGVK(+H2)	363.219	36.2	1574709
3_3	3_3_01.raw	sp|Q9UKV3|ACINU_HUMAN	Q9UKV3	ACIN1	TALHGVK	C32H56N10O9[M+2H]	TALHGVK(+H2)	363.219	36.2	649457
4_1	4_1_01.raw	sp|Q9UKV3|ACINU_HUMAN	Q9UKV3	ACIN1	TALHGVK	C32H56N10O9[M+2H]	TALHGVK(+H2)	363.219	36.2	453788
4_2	4_2_01.raw	sp|Q9UKV3|ACINU_HUMAN	Q9UKV3	ACIN1	TALHGVK	C32H56N10O9[M+2H]	TALHGVK(+H2)	363.219	36.2	1958033
4_3	4_3_01.raw	sp|Q9UKV3|ACINU_HUMAN	Q9UKV3	ACIN1	TALHGVK	C32H56N10O9[M+2H]	TALHGVK(+H2)	363.219	36.2	1808989
1_4	1_4_01.raw	sp|Q9UKV3|ACINU_HUMAN	Q9UKV3	ACIN1	TALHGVK	C32H56N10O9[M+2H]	TALHGVK(+H2)	363.219	36.2	500316
1_5	1_5_01.raw	sp|Q9UKV3|ACINU_HUMAN	Q9UKV3	ACIN1	TALHGVK	C32H56N10O9[M+2H]	TALHGVK(+H2)	363.219	36.2	2172042
1_6	1_6_01.raw	sp|Q9UKV3|ACINU_HUMAN	Q9UKV3	ACIN1	TALHGVK	C32H56N10O9[M+2H]	TALHGVK(+H2)	363.219	36.2	3361038
2_4	2_4_01.raw	sp|Q9UKV3|ACINU_HUMAN	Q9UKV3	ACIN1	TALHGVK	C32H56N10O9[M+2H]	TALHGVK(+H2)	363.219	36.2	1457751
2_5	2_5_01.raw	sp|Q9UKV3|ACINU_HUMAN	Q9UKV3	ACIN1	TALHGVK	C32H56N10O9[M+2H]	TALHGVK(+H2)	363.219	36.2	1430851
2_6	2_6_01.raw	sp|Q9UKV3|ACINU_HUMAN	Q9UKV3	ACIN1	TALHGVK	C32H56N10O9[M+2H]	TALHGVK(+H2)	363.219	36.2	1258303
3_4	3_4_01.raw	sp|Q9UKV3|ACINU_HUMAN	Q9UKV3	ACIN1	TALHGVK	C32H56N10O9[M+2H]	TALHGVK(+H2)	363.219	36.2	910129
3_5	3_5_01.raw	sp|Q9UKV3|ACINU_HUMAN	Q9UKV3	ACIN1	TALHGVK	C32H56N10O9[M+2H]	TALHGVK(+H2)	363.219	36.2	734281
3_6	3_6_01.raw	sp|Q9UKV3|ACINU_HUMAN	Q9UKV3	ACIN1	TALHGVK	C32H56N10O9[M+2H]	TALHGVK(+H2)	363.219	36.2	1358583
4_4	4_4_01.raw	sp|Q9UKV3|ACINU_HUMAN	Q9UKV3	ACIN1	TALHGVK	C32H56N10O9[M+2H]	TALHGVK(+H2)	363.219	36.2	841717
4_5	4_5_01.raw	sp|Q9UKV3|ACINU_HUMAN	Q9UKV3	ACIN1	TALHGVK	C32H56N10O9[M+2H]	TALHGVK(+H2)	363.219	36.2	1321272
4_6	4_6_01.raw	sp|Q9UKV3|ACINU_HUMAN	Q9UKV3	ACIN1	TALHGVK	C32H56N10O9[M+2H]	TALHGVK(+H2)	363.219	36.2	1174228
1_7	1_7_01.raw	sp|Q9UKV3|ACINU_HUMAN	Q9UKV3	ACIN1	TALHGVK	C32H56N10O9[M+2H]	TALHGVK(+H2)	363.219	36.2	512426
1_8	1_8_01_171211223541.raw	sp|Q9UKV3|ACINU_HUMAN	Q9UKV3	ACIN1	TALHGVK	C32H56N10O9[M+2H]	TALHGVK(+H2)	363.219	36.2	1970434
1_9	1_9_01.raw	sp|Q9UKV3|ACINU_HUMAN	Q9UKV3	ACIN1	TALHGVK	C32H56N10O9[M+2H]	TALHGVK(+H2)	363.219	36.2	2437023
2_7	2_7_01.raw	sp|Q9UKV3|ACINU_HUMAN	Q9UKV3	ACIN1	TALHGVK	C32H56N10O9[M+2H]	TALHGVK(+H2)	363.219	36.2	1887322
2_8	2_8_01.raw	sp|Q9UKV3|ACINU_HUMAN	Q9UKV3	ACIN1	TALHGVK	C32H56N10O9[M+2H]	TALHGVK(+H2)	363.219	36.2	1506390
2_9	2_9_01_171217123101.raw	sp|Q9UKV3|ACINU_HUMAN	Q9UKV3	ACIN1	TALHGVK	C32H56N10O9[M+2H]	TALHGVK(+H2)	363.219	36.2	1340547
3_7	3_7_01.raw	sp|Q9UKV3|ACINU_HUMAN	Q9UKV3	ACIN1	TALHGVK	C32H56N10O9[M+2H]	TALHGVK(+H2)	363.219	36.2	434748
3_8	3_8_01.raw	sp|Q9UKV3|ACINU_HUMAN	Q9UKV3	ACIN1	TALHGVK	C32H56N10O9[M+2H]	TALHGVK(+H2)	363.219	36.2	549865
3_9	3_9_01.raw	sp|Q9UKV3|ACINU_HUMAN	Q9UKV3	ACIN1	TALHGVK	C32H56N10O9[M+2H]	TALHGVK(+H2)	363.219	36.2	1620648
4_7	4_7_01.raw	sp|Q9UKV3|ACINU_HUMAN	Q9UKV3	ACIN1	TALHGVK	C32H56N10O9[M+2H]	TALHGVK(+H2)	363.219	36.2	1305999
4_8	4_8_01.raw	sp|Q9UKV3|ACINU_HUMAN	Q9UKV3	ACIN1	TALHGVK	C32H56N10O9[M+2H]	TALHGVK(+H2)	363.219	36.2	711064
4_9	4_9_01.raw	sp|Q9UKV3|ACINU_HUMAN	Q9UKV3	ACIN1	TALHGVK	C32H56N10O9[M+2H]	TALHGVK(+H2)	363.219	36.2	1432540
1_10	1_10_01.raw	sp|Q9UKV3|ACINU_HUMAN	Q9UKV3	ACIN1	TALHGVK	C32H56N10O9[M+2H]	TALHGVK(+H2)	363.219	36.2	3088400
1_11	1_11_01.raw	sp|Q9UKV3|ACINU_HUMAN	Q9UKV3	ACIN1	TALHGVK	C32H56N10O9[M+2H]	TALHGVK(+H2)	363.219	36.2	400975
1_12	1_12_01.raw	sp|Q9UKV3|ACINU_HUMAN	Q9UKV3	ACIN1	TALHGVK	C32H56N10O9[M+2H]	TALHGVK(+H2)	363.219	36.2	6668266
2_10	2_10_01.raw	sp|Q9UKV3|ACINU_HUMAN	Q9UKV3	ACIN1	TALHGVK	C32H56N10O9[M+2H]	TALHGVK(+H2)	363.219	36.2	3753348
2_11	2_11_01_171223040132.raw	sp|Q9UKV3|ACINU_HUMAN	Q9UKV3	ACIN1	TALHGVK	C32H56N10O9[M+2H]	TALHGVK(+H2)	363.219	36.2	3650567
2_12	2_12_01.raw	sp|Q9UKV3|ACINU_HUMAN	Q9UKV3	ACIN1	TALHGVK	C32H56N10O9[M+2H]	TALHGVK(+H2)	363.219	36.2	2841040
3_10	3_10_01.raw	sp|Q9UKV3|ACINU_HUMAN	Q9UKV3	ACIN1	TALHGVK	C32H56N10O9[M+2H]	TALHGVK(+H2)	363.219	36.2	1610840
3_11	3_11_01.raw	sp|Q9UKV3|ACINU_HUMAN	Q9UKV3	ACIN1	TALHGVK	C32H56N10O9[M+2H]	TALHGVK(+H2)	363.219	36.2	1245973
Chromatograms	FinalList2_2.raw	sp|Q9Y305|ACOT9_HUMAN	Q9Y305	ACOT9	IAFSSTSLLK	C49H83N11O15[M+2H]	IAFSSTSLLK(+H2)	533.811	81.04	87325
GPS01	GPS01_2.raw	sp|Q9Y305|ACOT9_HUMAN	Q9Y305	ACOT9	IAFSSTSLLK	C49H83N11O15[M+2H]	IAFSSTSLLK(+H2)	533.811	81.04	1510101
GPS02	GPS02_2.raw	sp|Q9Y305|ACOT9_HUMAN	Q9Y305	ACOT9	IAFSSTSLLK	C49H83N11O15[M+2H]	IAFSSTSLLK(+H2)	533.811	81.04	1114690
GPS03	GPS03_2.raw	sp|Q9Y305|ACOT9_HUMAN	Q9Y305	ACOT9	IAFSSTSLLK	C49H83N11O15[M+2H]	IAFSSTSLLK(+H2)	533.811	81.04	573659
GPS04	GPS04_2.raw	sp|Q9Y305|ACOT9_HUMAN	Q9Y305	ACOT9	IAFSSTSLLK	C49H83N11O15[M+2H]	IAFSSTSLLK(+H2)	533.811	81.04	797382
GPS05	GPS_05_02.raw	sp|Q9Y305|ACOT9_HUMAN	Q9Y305	ACOT9	IAFSSTSLLK	C49H83N11O15[M+2H]	IAFSSTSLLK(+H2)	533.811	81.04	261810
GPS06	GPS_06_02.raw	sp|Q9Y305|ACOT9_HUMAN	Q9Y305	ACOT9	IAFSSTSLLK	C49H83N11O15[M+2H]	IAFSSTSLLK(+H2)	533.811	81.04	95385
1_1	1_1_02.raw	sp|Q9Y305|ACOT9_HUMAN	Q9Y305	ACOT9	IAFSSTSLLK	C49H83N11O15[M+2H]	IAFSSTSLLK(+H2)	533.811	81.04	5613694
1_2	1_2_02.raw	sp|Q9Y305|ACOT9_HUMAN	Q9Y305	ACOT9	IAFSSTSLLK	C49H83N11O15[M+2H]	IAFSSTSLLK(+H2)	533.811	81.04	983627
1_3	1_3_02.raw	sp|Q9Y305|ACOT9_HUMAN	Q9Y305	ACOT9	IAFSSTSLLK	C49H83N11O15[M+2H]	IAFSSTSLLK(+H2)	533.811	81.04	1324404
2_1	2_1_02.raw	sp|Q9Y305|ACOT9_HUMAN	Q9Y305	ACOT9	IAFSSTSLLK	C49H83N11O15[M+2H]	IAFSSTSLLK(+H2)	533.811	81.04	2532537
2_2	2_2_02.raw	sp|Q9Y305|ACOT9_HUMAN	Q9Y305	ACOT9	IAFSSTSLLK	C49H83N11O15[M+2H]	IAFSSTSLLK(+H2)	533.811	81.04	366622
2_3	2_3_02.raw	sp|Q9Y305|ACOT9_HUMAN	Q9Y305	ACOT9	IAFSSTSLLK	C49H83N11O15[M+2H]	IAFSSTSLLK(+H2)	533.811	81.04	416962
3_1	3_1_02.raw	sp|Q9Y305|ACOT9_HUMAN	Q9Y305	ACOT9	IAFSSTSLLK	C49H83N11O15[M+2H]	IAFSSTSLLK(+H2)	533.811	81.04	100195
3_2	3_2_02.raw	sp|Q9Y305|ACOT9_HUMAN	Q9Y305	ACOT9	IAFSSTSLLK	C49H83N11O15[M+2H]	IAFSSTSLLK(+H2)	533.811	81.04	264542
3_3	3_3_02.raw	sp|Q9Y305|ACOT9_HUMAN	Q9Y305	ACOT9	IAFSSTSLLK	C49H83N11O15[M+2H]	IAFSSTSLLK(+H2)	533.811	81.04	25866
4_1	4_1_02.raw	sp|Q9Y305|ACOT9_HUMAN	Q9Y305	ACOT9	IAFSSTSLLK	C49H83N11O15[M+2H]	IAFSSTSLLK(+H2)	533.811	81.04	27314
4_2	4_2_02.raw	sp|Q9Y305|ACOT9_HUMAN	Q9Y305	ACOT9	IAFSSTSLLK	C49H83N11O15[M+2H]	IAFSSTSLLK(+H2)	533.811	81.04	69484
4_3	4_3_02.raw	sp|Q9Y305|ACOT9_HUMAN	Q9Y305	ACOT9	IAFSSTSLLK	C49H83N11O15[M+2H]	IAFSSTSLLK(+H2)	533.811	81.04	8925
1_4	1_4_02.raw	sp|Q9Y305|ACOT9_HUMAN	Q9Y305	ACOT9	IAFSSTSLLK	C49H83N11O15[M+2H]	IAFSSTSLLK(+H2)	533.811	81.04	355530
1_5	1_5_02.raw	sp|Q9Y305|ACOT9_HUMAN	Q9Y305	ACOT9	IAFSSTSLLK	C49H83N11O15[M+2H]	IAFSSTSLLK(+H2)	533.811	81.04	632361
1_6	1_6_02.raw	sp|Q9Y305|ACOT9_HUMAN	Q9Y305	ACOT9	IAFSSTSLLK	C49H83N11O15[M+2H]	IAFSSTSLLK(+H2)	533.811	81.04	745303
2_4	2_4_02.raw	sp|Q9Y305|ACOT9_HUMAN	Q9Y305	ACOT9	IAFSSTSLLK	C49H83N11O15[M+2H]	IAFSSTSLLK(+H2)	533.811	81.04	285208
2_5	2_5_02.raw	sp|Q9Y305|ACOT9_HUMAN	Q9Y305	ACOT9	IAFSSTSLLK	C49H83N11O15[M+2H]	IAFSSTSLLK(+H2)	533.811	81.04	738938
2_6	2_6_02.raw	sp|Q9Y305|ACOT9_HUMAN	Q9Y305	ACOT9	IAFSSTSLLK	C49H83N11O15[M+2H]	IAFSSTSLLK(+H2)	533.811	81.04	834569
3_4	3_4_02.raw	sp|Q9Y305|ACOT9_HUMAN	Q9Y305	ACOT9	IAFSSTSLLK	C49H83N11O15[M+2H]	IAFSSTSLLK(+H2)	533.811	81.04	4672
3_5	3_5_02.raw	sp|Q9Y305|ACOT9_HUMAN	Q9Y305	ACOT9	IAFSSTSLLK	C49H83N11O15[M+2H]	IAFSSTSLLK(+H2)	533.811	81.04	25636
3_6	3_6_02.raw	sp|Q9Y305|ACOT9_HUMAN	Q9Y305	ACOT9	IAFSSTSLLK	C49H83N11O15[M+2H]	IAFSSTSLLK(+H2)	533.811	81.04	36765
4_4	4_4_02.raw	sp|Q9Y305|ACOT9_HUMAN	Q9Y305	ACOT9	IAFSSTSLLK	C49H83N11O15[M+2H]	IAFSSTSLLK(+H2)	533.811	81.04	15050
4_5	4_5_02.raw	sp|Q9Y305|ACOT9_HUMAN	Q9Y305	ACOT9	IAFSSTSLLK	C49H83N11O15[M+2H]	IAFSSTSLLK(+H2)	533.811	81.04	25818
4_6	4_6_02.raw	sp|Q9Y305|ACOT9_HUMAN	Q9Y305	ACOT9	IAFSSTSLLK	C49H83N11O15[M+2H]	IAFSSTSLLK(+H2)	533.811	81.04	85509
1_7	1_7_02.raw	sp|Q9Y305|ACOT9_HUMAN	Q9Y305	ACOT9	IAFSSTSLLK	C49H83N11O15[M+2H]	IAFSSTSLLK(+H2)	533.811	81.04	196871
1_8	1_8_02.raw	sp|Q9Y305|ACOT9_HUMAN	Q9Y305	ACOT9	IAFSSTSLLK	C49H83N11O15[M+2H]	IAFSSTSLLK(+H2)	533.811	81.04	227624
1_9	1_9_02.raw	sp|Q9Y305|ACOT9_HUMAN	Q9Y305	ACOT9	IAFSSTSLLK	C49H83N11O15[M+2H]	IAFSSTSLLK(+H2)	533.811	81.04	949303
2_7	2_7_02.raw	sp|Q9Y305|ACOT9_HUMAN	Q9Y305	ACOT9	IAFSSTSLLK	C49H83N11O15[M+2H]	IAFSSTSLLK(+H2)	533.811	81.04	510949
2_8	2_8_02.raw	sp|Q9Y305|ACOT9_HUMAN	Q9Y305	ACOT9	IAFSSTSLLK	C49H83N11O15[M+2H]	IAFSSTSLLK(+H2)	533.811	81.04	165129
2_9	2_9_02_171217160937.raw	sp|Q9Y305|ACOT9_HUMAN	Q9Y305	ACOT9	IAFSSTSLLK	C49H83N11O15[M+2H]	IAFSSTSLLK(+H2)	533.811	81.04	396305
3_7	3_7_02.raw	sp|Q9Y305|ACOT9_HUMAN	Q9Y305	ACOT9	IAFSSTSLLK	C49H83N11O15[M+2H]	IAFSSTSLLK(+H2)	533.811	81.04	33721
3_8	3_8_02.raw	sp|Q9Y305|ACOT9_HUMAN	Q9Y305	ACOT9	IAFSSTSLLK	C49H83N11O15[M+2H]	IAFSSTSLLK(+H2)	533.811	81.04	34694
3_9	3_9_02.raw	sp|Q9Y305|ACOT9_HUMAN	Q9Y305	ACOT9	IAFSSTSLLK	C49H83N11O15[M+2H]	IAFSSTSLLK(+H2)	533.811	81.04	426268
4_7	4_7_02.raw	sp|Q9Y305|ACOT9_HUMAN	Q9Y305	ACOT9	IAFSSTSLLK	C49H83N11O15[M+2H]	IAFSSTSLLK(+H2)	533.811	81.04	22743
4_8	4_8_02.raw	sp|Q9Y305|ACOT9_HUMAN	Q9Y305	ACOT9	IAFSSTSLLK	C49H83N11O15[M+2H]	IAFSSTSLLK(+H2)	533.811	81.04	38975
4_9	4_9_02.raw	sp|Q9Y305|ACOT9_HUMAN	Q9Y305	ACOT9	IAFSSTSLLK	C49H83N11O15[M+2H]	IAFSSTSLLK(+H2)	533.811	81.04	11493
1_10	1_10_02.raw	sp|Q9Y305|ACOT9_HUMAN	Q9Y305	ACOT9	IAFSSTSLLK	C49H83N11O15[M+2H]	IAFSSTSLLK(+H2)	533.811	81.04	767320
1_11	1_11_02.raw	sp|Q9Y305|ACOT9_HUMAN	Q9Y305	ACOT9	IAFSSTSLLK	C49H83N11O15[M+2H]	IAFSSTSLLK(+H2)	533.811	81.04	21779814
1_12	1_12_02.raw	sp|Q9Y305|ACOT9_HUMAN	Q9Y305	ACOT9	IAFSSTSLLK	C49H83N11O15[M+2H]	IAFSSTSLLK(+H2)	533.811	81.04	736767
2_10	2_10_02.raw	sp|Q9Y305|ACOT9_HUMAN	Q9Y305	ACOT9	IAFSSTSLLK	C49H83N11O15[M+2H]	IAFSSTSLLK(+H2)	533.811	81.04	410778
2_11	2_11_02.raw	sp|Q9Y305|ACOT9_HUMAN	Q9Y305	ACOT9	IAFSSTSLLK	C49H83N11O15[M+2H]	IAFSSTSLLK(+H2)	533.811	81.04	222222
2_12	2_12_02.raw	sp|Q9Y305|ACOT9_HUMAN	Q9Y305	ACOT9	IAFSSTSLLK	C49H83N11O15[M+2H]	IAFSSTSLLK(+H2)	533.811	81.04	407189
3_10	3_10_02.raw	sp|Q9Y305|ACOT9_HUMAN	Q9Y305	ACOT9	IAFSSTSLLK	C49H83N11O15[M+2H]	IAFSSTSLLK(+H2)	533.811	81.04	108981
3_11	3_11_02.raw	sp|Q9Y305|ACOT9_HUMAN	Q9Y305	ACOT9	IAFSSTSLLK	C49H83N11O15[M+2H]	IAFSSTSLLK(+H2)	533.811	81.04	15630
Chromatograms	FinalList2_2.raw	sp|Q9Y305|ACOT9_HUMAN	Q9Y305	ACOT9	VHSEVASLQEK	C52H87N15O19[M+2H]	VHSEVASLQEK(+H2)	613.822	41.39	530466
GPS01	GPS01_1.raw	sp|Q9Y305|ACOT9_HUMAN	Q9Y305	ACOT9	VHSEVASLQEK	C52H87N15O19[M+2H]	VHSEVASLQEK(+H2)	613.822	41.39	782452
GPS02	GPS02_1.raw	sp|Q9Y305|ACOT9_HUMAN	Q9Y305	ACOT9	VHSEVASLQEK	C52H87N15O19[M+2H]	VHSEVASLQEK(+H2)	613.822	41.39	937434
GPS03	GPS03_1.raw	sp|Q9Y305|ACOT9_HUMAN	Q9Y305	ACOT9	VHSEVASLQEK	C52H87N15O19[M+2H]	VHSEVASLQEK(+H2)	613.822	41.39	767824
GPS04	GPS04_1.raw	sp|Q9Y305|ACOT9_HUMAN	Q9Y305	ACOT9	VHSEVASLQEK	C52H87N15O19[M+2H]	VHSEVASLQEK(+H2)	613.822	41.39	696495
GPS05	GPS_05_01.raw	sp|Q9Y305|ACOT9_HUMAN	Q9Y305	ACOT9	VHSEVASLQEK	C52H87N15O19[M+2H]	VHSEVASLQEK(+H2)	613.822	41.39	497484
GPS06	GPS_06_01.raw	sp|Q9Y305|ACOT9_HUMAN	Q9Y305	ACOT9	VHSEVASLQEK	C52H87N15O19[M+2H]	VHSEVASLQEK(+H2)	613.822	41.39	426624
1_1	1_1_01.raw	sp|Q9Y305|ACOT9_HUMAN	Q9Y305	ACOT9	VHSEVASLQEK	C52H87N15O19[M+2H]	VHSEVASLQEK(+H2)	613.822	41.39	3066690
1_2	1_2_01.raw	sp|Q9Y305|ACOT9_HUMAN	Q9Y305	ACOT9	VHSEVASLQEK	C52H87N15O19[M+2H]	VHSEVASLQEK(+H2)	613.822	41.39	861229
1_3	1_3_01.raw	sp|Q9Y305|ACOT9_HUMAN	Q9Y305	ACOT9	VHSEVASLQEK	C52H87N15O19[M+2H]	VHSEVASLQEK(+H2)	613.822	41.39	959906
2_1	2_1_01.raw	sp|Q9Y305|ACOT9_HUMAN	Q9Y305	ACOT9	VHSEVASLQEK	C52H87N15O19[M+2H]	VHSEVASLQEK(+H2)	613.822	41.39	1595039
2_2	2_2_01.raw	sp|Q9Y305|ACOT9_HUMAN	Q9Y305	ACOT9	VHSEVASLQEK	C52H87N15O19[M+2H]	VHSEVASLQEK(+H2)	613.822	41.39	455060
2_3	2_3_01.raw	sp|Q9Y305|ACOT9_HUMAN	Q9Y305	ACOT9	VHSEVASLQEK	C52H87N15O19[M+2H]	VHSEVASLQEK(+H2)	613.822	41.39	580519
3_1	3_1_01.raw	sp|Q9Y305|ACOT9_HUMAN	Q9Y305	ACOT9	VHSEVASLQEK	C52H87N15O19[M+2H]	VHSEVASLQEK(+H2)	613.822	41.39	348206
3_2	3_2_01_171223210221.raw	sp|Q9Y305|ACOT9_HUMAN	Q9Y305	ACOT9	VHSEVASLQEK	C52H87N15O19[M+2H]	VHSEVASLQEK(+H2)	613.822	41.39	462985
3_3	3_3_01.raw	sp|Q9Y305|ACOT9_HUMAN	Q9Y305	ACOT9	VHSEVASLQEK	C52H87N15O19[M+2H]	VHSEVASLQEK(+H2)	613.822	41.39	554352
4_1	4_1_01.raw	sp|Q9Y305|ACOT9_HUMAN	Q9Y305	ACOT9	VHSEVASLQEK	C52H87N15O19[M+2H]	VHSEVASLQEK(+H2)	613.822	41.39	71296
4_2	4_2_01.raw	sp|Q9Y305|ACOT9_HUMAN	Q9Y305	ACOT9	VHSEVASLQEK	C52H87N15O19[M+2H]	VHSEVASLQEK(+H2)	613.822	41.39	333240
4_3	4_3_01.raw	sp|Q9Y305|ACOT9_HUMAN	Q9Y305	ACOT9	VHSEVASLQEK	C52H87N15O19[M+2H]	VHSEVASLQEK(+H2)	613.822	41.39	185178
1_4	1_4_01.raw	sp|Q9Y305|ACOT9_HUMAN	Q9Y305	ACOT9	VHSEVASLQEK	C52H87N15O19[M+2H]	VHSEVASLQEK(+H2)	613.822	41.39	392827
1_5	1_5_01.raw	sp|Q9Y305|ACOT9_HUMAN	Q9Y305	ACOT9	VHSEVASLQEK	C52H87N15O19[M+2H]	VHSEVASLQEK(+H2)	613.822	41.39	982945
1_6	1_6_01.raw	sp|Q9Y305|ACOT9_HUMAN	Q9Y305	ACOT9	VHSEVASLQEK	C52H87N15O19[M+2H]	VHSEVASLQEK(+H2)	613.822	41.39	1002572
2_4	2_4_01.raw	sp|Q9Y305|ACOT9_HUMAN	Q9Y305	ACOT9	VHSEVASLQEK	C52H87N15O19[M+2H]	VHSEVASLQEK(+H2)	613.822	41.39	650693
2_5	2_5_01.raw	sp|Q9Y305|ACOT9_HUMAN	Q9Y305	ACOT9	VHSEVASLQEK	C52H87N15O19[M+2H]	VHSEVASLQEK(+H2)	613.822	41.39	831083
2_6	2_6_01.raw	sp|Q9Y305|ACOT9_HUMAN	Q9Y305	ACOT9	VHSEVASLQEK	C52H87N15O19[M+2H]	VHSEVASLQEK(+H2)	613.822	41.39	860608
3_4	3_4_01.raw	sp|Q9Y305|ACOT9_HUMAN	Q9Y305	ACOT9	VHSEVASLQEK	C52H87N15O19[M+2H]	VHSEVASLQEK(+H2)	613.822	41.39	775338
3_5	3_5_01.raw	sp|Q9Y305|ACOT9_HUMAN	Q9Y305	ACOT9	VHSEVASLQEK	C52H87N15O19[M+2H]	VHSEVASLQEK(+H2)	613.822	41.39	375431
3_6	3_6_01.raw	sp|Q9Y305|ACOT9_HUMAN	Q9Y305	ACOT9	VHSEVASLQEK	C52H87N15O19[M+2H]	VHSEVASLQEK(+H2)	613.822	41.39	366816
4_4	4_4_01.raw	sp|Q9Y305|ACOT9_HUMAN	Q9Y305	ACOT9	VHSEVASLQEK	C52H87N15O19[M+2H]	VHSEVASLQEK(+H2)	613.822	41.39	376187
4_5	4_5_01.raw	sp|Q9Y305|ACOT9_HUMAN	Q9Y305	ACOT9	VHSEVASLQEK	C52H87N15O19[M+2H]	VHSEVASLQEK(+H2)	613.822	41.39	163609
4_6	4_6_01.raw	sp|Q9Y305|ACOT9_HUMAN	Q9Y305	ACOT9	VHSEVASLQEK	C52H87N15O19[M+2H]	VHSEVASLQEK(+H2)	613.822	41.39	110091
1_7	1_7_01.raw	sp|Q9Y305|ACOT9_HUMAN	Q9Y305	ACOT9	VHSEVASLQEK	C52H87N15O19[M+2H]	VHSEVASLQEK(+H2)	613.822	41.39	527641
1_8	1_8_01_171211223541.raw	sp|Q9Y305|ACOT9_HUMAN	Q9Y305	ACOT9	VHSEVASLQEK	C52H87N15O19[M+2H]	VHSEVASLQEK(+H2)	613.822	41.39	548629
1_9	1_9_01.raw	sp|Q9Y305|ACOT9_HUMAN	Q9Y305	ACOT9	VHSEVASLQEK	C52H87N15O19[M+2H]	VHSEVASLQEK(+H2)	613.822	41.39	912985
2_7	2_7_01.raw	sp|Q9Y305|ACOT9_HUMAN	Q9Y305	ACOT9	VHSEVASLQEK	C52H87N15O19[M+2H]	VHSEVASLQEK(+H2)	613.822	41.39	504863
2_8	2_8_01.raw	sp|Q9Y305|ACOT9_HUMAN	Q9Y305	ACOT9	VHSEVASLQEK	C52H87N15O19[M+2H]	VHSEVASLQEK(+H2)	613.822	41.39	413741
2_9	2_9_01_171217123101.raw	sp|Q9Y305|ACOT9_HUMAN	Q9Y305	ACOT9	VHSEVASLQEK	C52H87N15O19[M+2H]	VHSEVASLQEK(+H2)	613.822	41.39	576679
3_7	3_7_01.raw	sp|Q9Y305|ACOT9_HUMAN	Q9Y305	ACOT9	VHSEVASLQEK	C52H87N15O19[M+2H]	VHSEVASLQEK(+H2)	613.822	41.39	268442
3_8	3_8_01.raw	sp|Q9Y305|ACOT9_HUMAN	Q9Y305	ACOT9	VHSEVASLQEK	C52H87N15O19[M+2H]	VHSEVASLQEK(+H2)	613.822	41.39	269010
3_9	3_9_01.raw	sp|Q9Y305|ACOT9_HUMAN	Q9Y305	ACOT9	VHSEVASLQEK	C52H87N15O19[M+2H]	VHSEVASLQEK(+H2)	613.822	41.39	541837
4_7	4_7_01.raw	sp|Q9Y305|ACOT9_HUMAN	Q9Y305	ACOT9	VHSEVASLQEK	C52H87N15O19[M+2H]	VHSEVASLQEK(+H2)	613.822	41.39	261844
4_8	4_8_01.raw	sp|Q9Y305|ACOT9_HUMAN	Q9Y305	ACOT9	VHSEVASLQEK	C52H87N15O19[M+2H]	VHSEVASLQEK(+H2)	613.822	41.39	331362
4_9	4_9_01.raw	sp|Q9Y305|ACOT9_HUMAN	Q9Y305	ACOT9	VHSEVASLQEK	C52H87N15O19[M+2H]	VHSEVASLQEK(+H2)	613.822	41.39	148645
1_10	1_10_01.raw	sp|Q9Y305|ACOT9_HUMAN	Q9Y305	ACOT9	VHSEVASLQEK	C52H87N15O19[M+2H]	VHSEVASLQEK(+H2)	613.822	41.39	1051164
1_11	1_11_01.raw	sp|Q9Y305|ACOT9_HUMAN	Q9Y305	ACOT9	VHSEVASLQEK	C52H87N15O19[M+2H]	VHSEVASLQEK(+H2)	613.822	41.39	12469632
1_12	1_12_01.raw	sp|Q9Y305|ACOT9_HUMAN	Q9Y305	ACOT9	VHSEVASLQEK	C52H87N15O19[M+2H]	VHSEVASLQEK(+H2)	613.822	41.39	637415
2_10	2_10_01.raw	sp|Q9Y305|ACOT9_HUMAN	Q9Y305	ACOT9	VHSEVASLQEK	C52H87N15O19[M+2H]	VHSEVASLQEK(+H2)	613.822	41.39	562413
2_11	2_11_01_171223040132.raw	sp|Q9Y305|ACOT9_HUMAN	Q9Y305	ACOT9	VHSEVASLQEK	C52H87N15O19[M+2H]	VHSEVASLQEK(+H2)	613.822	41.39	417135
2_12	2_12_01.raw	sp|Q9Y305|ACOT9_HUMAN	Q9Y305	ACOT9	VHSEVASLQEK	C52H87N15O19[M+2H]	VHSEVASLQEK(+H2)	613.822	41.39	463239
3_10	3_10_01.raw	sp|Q9Y305|ACOT9_HUMAN	Q9Y305	ACOT9	VHSEVASLQEK	C52H87N15O19[M+2H]	VHSEVASLQEK(+H2)	613.822	41.39	405101
3_11	3_11_01.raw	sp|Q9Y305|ACOT9_HUMAN	Q9Y305	ACOT9	VHSEVASLQEK	C52H87N15O19[M+2H]	VHSEVASLQEK(+H2)	613.822	41.39	169286
Chromatograms	FinalList2_1.raw	sp|P55265|DSRAD_HUMAN	P55265	ADAR	YLNTNPVGGLLEYAR	C76H118N20O23[M+2H]	YLNTNPVGGLLEYAR(+H2)	840.441	103.55	10037584
GPS01	GPS01_2.raw	sp|P55265|DSRAD_HUMAN	P55265	ADAR	YLNTNPVGGLLEYAR	C76H118N20O23[M+2H]	YLNTNPVGGLLEYAR(+H2)	840.441	103.55	11083924
GPS02	GPS02_2.raw	sp|P55265|DSRAD_HUMAN	P55265	ADAR	YLNTNPVGGLLEYAR	C76H118N20O23[M+2H]	YLNTNPVGGLLEYAR(+H2)	840.441	103.55	8787904
GPS03	GPS03_2.raw	sp|P55265|DSRAD_HUMAN	P55265	ADAR	YLNTNPVGGLLEYAR	C76H118N20O23[M+2H]	YLNTNPVGGLLEYAR(+H2)	840.441	103.55	10179159
GPS04	GPS04_2.raw	sp|P55265|DSRAD_HUMAN	P55265	ADAR	YLNTNPVGGLLEYAR	C76H118N20O23[M+2H]	YLNTNPVGGLLEYAR(+H2)	840.441	103.55	11247409
GPS05	GPS_05_02.raw	sp|P55265|DSRAD_HUMAN	P55265	ADAR	YLNTNPVGGLLEYAR	C76H118N20O23[M+2H]	YLNTNPVGGLLEYAR(+H2)	840.441	103.55	10202287
GPS06	GPS_06_02.raw	sp|P55265|DSRAD_HUMAN	P55265	ADAR	YLNTNPVGGLLEYAR	C76H118N20O23[M+2H]	YLNTNPVGGLLEYAR(+H2)	840.441	103.55	8042493
1_1	1_1_02.raw	sp|P55265|DSRAD_HUMAN	P55265	ADAR	YLNTNPVGGLLEYAR	C76H118N20O23[M+2H]	YLNTNPVGGLLEYAR(+H2)	840.441	103.55	10290696
1_2	1_2_02.raw	sp|P55265|DSRAD_HUMAN	P55265	ADAR	YLNTNPVGGLLEYAR	C76H118N20O23[M+2H]	YLNTNPVGGLLEYAR(+H2)	840.441	103.55	11734695
1_3	1_3_02.raw	sp|P55265|DSRAD_HUMAN	P55265	ADAR	YLNTNPVGGLLEYAR	C76H118N20O23[M+2H]	YLNTNPVGGLLEYAR(+H2)	840.441	103.55	8152598
2_1	2_1_02.raw	sp|P55265|DSRAD_HUMAN	P55265	ADAR	YLNTNPVGGLLEYAR	C76H118N20O23[M+2H]	YLNTNPVGGLLEYAR(+H2)	840.441	103.55	13442148
2_2	2_2_02.raw	sp|P55265|DSRAD_HUMAN	P55265	ADAR	YLNTNPVGGLLEYAR	C76H118N20O23[M+2H]	YLNTNPVGGLLEYAR(+H2)	840.441	103.55	6966903
2_3	2_3_02.raw	sp|P55265|DSRAD_HUMAN	P55265	ADAR	YLNTNPVGGLLEYAR	C76H118N20O23[M+2H]	YLNTNPVGGLLEYAR(+H2)	840.441	103.55	10759656
3_1	3_1_02.raw	sp|P55265|DSRAD_HUMAN	P55265	ADAR	YLNTNPVGGLLEYAR	C76H118N20O23[M+2H]	YLNTNPVGGLLEYAR(+H2)	840.441	103.55	9145770
3_2	3_2_02.raw	sp|P55265|DSRAD_HUMAN	P55265	ADAR	YLNTNPVGGLLEYAR	C76H118N20O23[M+2H]	YLNTNPVGGLLEYAR(+H2)	840.441	103.55	8321535
3_3	3_3_02.raw	sp|P55265|DSRAD_HUMAN	P55265	ADAR	YLNTNPVGGLLEYAR	C76H118N20O23[M+2H]	YLNTNPVGGLLEYAR(+H2)	840.441	103.55	5187158
4_1	4_1_02.raw	sp|P55265|DSRAD_HUMAN	P55265	ADAR	YLNTNPVGGLLEYAR	C76H118N20O23[M+2H]	YLNTNPVGGLLEYAR(+H2)	840.441	103.55	9766114
4_2	4_2_02.raw	sp|P55265|DSRAD_HUMAN	P55265	ADAR	YLNTNPVGGLLEYAR	C76H118N20O23[M+2H]	YLNTNPVGGLLEYAR(+H2)	840.441	103.55	7653875
4_3	4_3_02.raw	sp|P55265|DSRAD_HUMAN	P55265	ADAR	YLNTNPVGGLLEYAR	C76H118N20O23[M+2H]	YLNTNPVGGLLEYAR(+H2)	840.441	103.55	11465564
1_4	1_4_02.raw	sp|P55265|DSRAD_HUMAN	P55265	ADAR	YLNTNPVGGLLEYAR	C76H118N20O23[M+2H]	YLNTNPVGGLLEYAR(+H2)	840.441	103.55	1231673
1_5	1_5_02.raw	sp|P55265|DSRAD_HUMAN	P55265	ADAR	YLNTNPVGGLLEYAR	C76H118N20O23[M+2H]	YLNTNPVGGLLEYAR(+H2)	840.441	103.55	9283835
1_6	1_6_02.raw	sp|P55265|DSRAD_HUMAN	P55265	ADAR	YLNTNPVGGLLEYAR	C76H118N20O23[M+2H]	YLNTNPVGGLLEYAR(+H2)	840.441	103.55	11192196
2_4	2_4_02.raw	sp|P55265|DSRAD_HUMAN	P55265	ADAR	YLNTNPVGGLLEYAR	C76H118N20O23[M+2H]	YLNTNPVGGLLEYAR(+H2)	840.441	103.55	10875700
2_5	2_5_02.raw	sp|P55265|DSRAD_HUMAN	P55265	ADAR	YLNTNPVGGLLEYAR	C76H118N20O23[M+2H]	YLNTNPVGGLLEYAR(+H2)	840.441	103.55	19245112
2_6	2_6_02.raw	sp|P55265|DSRAD_HUMAN	P55265	ADAR	YLNTNPVGGLLEYAR	C76H118N20O23[M+2H]	YLNTNPVGGLLEYAR(+H2)	840.441	103.55	18241858
3_4	3_4_02.raw	sp|P55265|DSRAD_HUMAN	P55265	ADAR	YLNTNPVGGLLEYAR	C76H118N20O23[M+2H]	YLNTNPVGGLLEYAR(+H2)	840.441	103.55	6465164
3_5	3_5_02.raw	sp|P55265|DSRAD_HUMAN	P55265	ADAR	YLNTNPVGGLLEYAR	C76H118N20O23[M+2H]	YLNTNPVGGLLEYAR(+H2)	840.441	103.55	6951368
3_6	3_6_02.raw	sp|P55265|DSRAD_HUMAN	P55265	ADAR	YLNTNPVGGLLEYAR	C76H118N20O23[M+2H]	YLNTNPVGGLLEYAR(+H2)	840.441	103.55	8208999
4_4	4_4_02.raw	sp|P55265|DSRAD_HUMAN	P55265	ADAR	YLNTNPVGGLLEYAR	C76H118N20O23[M+2H]	YLNTNPVGGLLEYAR(+H2)	840.441	103.55	4834657
4_5	4_5_02.raw	sp|P55265|DSRAD_HUMAN	P55265	ADAR	YLNTNPVGGLLEYAR	C76H118N20O23[M+2H]	YLNTNPVGGLLEYAR(+H2)	840.441	103.55	5967516
4_6	4_6_02.raw	sp|P55265|DSRAD_HUMAN	P55265	ADAR	YLNTNPVGGLLEYAR	C76H118N20O23[M+2H]	YLNTNPVGGLLEYAR(+H2)	840.441	103.55	9848499
1_7	1_7_02.raw	sp|P55265|DSRAD_HUMAN	P55265	ADAR	YLNTNPVGGLLEYAR	C76H118N20O23[M+2H]	YLNTNPVGGLLEYAR(+H2)	840.441	103.55	2756418
1_8	1_8_02.raw	sp|P55265|DSRAD_HUMAN	P55265	ADAR	YLNTNPVGGLLEYAR	C76H118N20O23[M+2H]	YLNTNPVGGLLEYAR(+H2)	840.441	103.55	2380405
1_9	1_9_02.raw	sp|P55265|DSRAD_HUMAN	P55265	ADAR	YLNTNPVGGLLEYAR	C76H118N20O23[M+2H]	YLNTNPVGGLLEYAR(+H2)	840.441	103.55	8095371
2_7	2_7_02.raw	sp|P55265|DSRAD_HUMAN	P55265	ADAR	YLNTNPVGGLLEYAR	C76H118N20O23[M+2H]	YLNTNPVGGLLEYAR(+H2)	840.441	103.55	6759627
2_8	2_8_02.raw	sp|P55265|DSRAD_HUMAN	P55265	ADAR	YLNTNPVGGLLEYAR	C76H118N20O23[M+2H]	YLNTNPVGGLLEYAR(+H2)	840.441	103.55	19642872
2_9	2_9_02_171217160937.raw	sp|P55265|DSRAD_HUMAN	P55265	ADAR	YLNTNPVGGLLEYAR	C76H118N20O23[M+2H]	YLNTNPVGGLLEYAR(+H2)	840.441	103.55	9750035
3_7	3_7_02.raw	sp|P55265|DSRAD_HUMAN	P55265	ADAR	YLNTNPVGGLLEYAR	C76H118N20O23[M+2H]	YLNTNPVGGLLEYAR(+H2)	840.441	103.55	2542113
3_8	3_8_02.raw	sp|P55265|DSRAD_HUMAN	P55265	ADAR	YLNTNPVGGLLEYAR	C76H118N20O23[M+2H]	YLNTNPVGGLLEYAR(+H2)	840.441	103.55	4694229
3_9	3_9_02.raw	sp|P55265|DSRAD_HUMAN	P55265	ADAR	YLNTNPVGGLLEYAR	C76H118N20O23[M+2H]	YLNTNPVGGLLEYAR(+H2)	840.441	103.55	15414982
4_7	4_7_02.raw	sp|P55265|DSRAD_HUMAN	P55265	ADAR	YLNTNPVGGLLEYAR	C76H118N20O23[M+2H]	YLNTNPVGGLLEYAR(+H2)	840.441	103.55	5277886
4_8	4_8_02.raw	sp|P55265|DSRAD_HUMAN	P55265	ADAR	YLNTNPVGGLLEYAR	C76H118N20O23[M+2H]	YLNTNPVGGLLEYAR(+H2)	840.441	103.55	0
4_9	4_9_02.raw	sp|P55265|DSRAD_HUMAN	P55265	ADAR	YLNTNPVGGLLEYAR	C76H118N20O23[M+2H]	YLNTNPVGGLLEYAR(+H2)	840.441	103.55	5579158
1_10	1_10_02.raw	sp|P55265|DSRAD_HUMAN	P55265	ADAR	YLNTNPVGGLLEYAR	C76H118N20O23[M+2H]	YLNTNPVGGLLEYAR(+H2)	840.441	103.55	8338092
1_11	1_11_02.raw	sp|P55265|DSRAD_HUMAN	P55265	ADAR	YLNTNPVGGLLEYAR	C76H118N20O23[M+2H]	YLNTNPVGGLLEYAR(+H2)	840.441	103.55	2879647
1_12	1_12_02.raw	sp|P55265|DSRAD_HUMAN	P55265	ADAR	YLNTNPVGGLLEYAR	C76H118N20O23[M+2H]	YLNTNPVGGLLEYAR(+H2)	840.441	103.55	12445544
2_10	2_10_02.raw	sp|P55265|DSRAD_HUMAN	P55265	ADAR	YLNTNPVGGLLEYAR	C76H118N20O23[M+2H]	YLNTNPVGGLLEYAR(+H2)	840.441	103.55	7052142
2_11	2_11_02.raw	sp|P55265|DSRAD_HUMAN	P55265	ADAR	YLNTNPVGGLLEYAR	C76H118N20O23[M+2H]	YLNTNPVGGLLEYAR(+H2)	840.441	103.55	11367827
2_12	2_12_02.raw	sp|P55265|DSRAD_HUMAN	P55265	ADAR	YLNTNPVGGLLEYAR	C76H118N20O23[M+2H]	YLNTNPVGGLLEYAR(+H2)	840.441	103.55	20394394
3_10	3_10_02.raw	sp|P55265|DSRAD_HUMAN	P55265	ADAR	YLNTNPVGGLLEYAR	C76H118N20O23[M+2H]	YLNTNPVGGLLEYAR(+H2)	840.441	103.55	1975401
3_11	3_11_02.raw	sp|P55265|DSRAD_HUMAN	P55265	ADAR	YLNTNPVGGLLEYAR	C76H118N20O23[M+2H]	YLNTNPVGGLLEYAR(+H2)	840.441	103.55	6291033
Chromatograms	FinalList2_2.raw	sp|P55265|DSRAD_HUMAN	P55265	ADAR	GETVNDC[+57]HAEIISR	C64H105N21O25S[M+3H]	GETVNDCHAEIISR(+H3)	534.251	48.07	3190430
GPS01	GPS01_1.raw	sp|P55265|DSRAD_HUMAN	P55265	ADAR	GETVNDC[+57]HAEIISR	C64H105N21O25S[M+3H]	GETVNDCHAEIISR(+H3)	534.251	48.07	5703241
GPS02	GPS02_1.raw	sp|P55265|DSRAD_HUMAN	P55265	ADAR	GETVNDC[+57]HAEIISR	C64H105N21O25S[M+3H]	GETVNDCHAEIISR(+H3)	534.251	48.07	5141877
GPS03	GPS03_1.raw	sp|P55265|DSRAD_HUMAN	P55265	ADAR	GETVNDC[+57]HAEIISR	C64H105N21O25S[M+3H]	GETVNDCHAEIISR(+H3)	534.251	48.07	3453549
GPS04	GPS04_1.raw	sp|P55265|DSRAD_HUMAN	P55265	ADAR	GETVNDC[+57]HAEIISR	C64H105N21O25S[M+3H]	GETVNDCHAEIISR(+H3)	534.251	48.07	3602903
GPS05	GPS_05_01.raw	sp|P55265|DSRAD_HUMAN	P55265	ADAR	GETVNDC[+57]HAEIISR	C64H105N21O25S[M+3H]	GETVNDCHAEIISR(+H3)	534.251	48.07	1871714
GPS06	GPS_06_01.raw	sp|P55265|DSRAD_HUMAN	P55265	ADAR	GETVNDC[+57]HAEIISR	C64H105N21O25S[M+3H]	GETVNDCHAEIISR(+H3)	534.251	48.07	2116542
1_1	1_1_01.raw	sp|P55265|DSRAD_HUMAN	P55265	ADAR	GETVNDC[+57]HAEIISR	C64H105N21O25S[M+3H]	GETVNDCHAEIISR(+H3)	534.251	48.07	6467200
1_2	1_2_01.raw	sp|P55265|DSRAD_HUMAN	P55265	ADAR	GETVNDC[+57]HAEIISR	C64H105N21O25S[M+3H]	GETVNDCHAEIISR(+H3)	534.251	48.07	5728255
1_3	1_3_01.raw	sp|P55265|DSRAD_HUMAN	P55265	ADAR	GETVNDC[+57]HAEIISR	C64H105N21O25S[M+3H]	GETVNDCHAEIISR(+H3)	534.251	48.07	5620565
2_1	2_1_01.raw	sp|P55265|DSRAD_HUMAN	P55265	ADAR	GETVNDC[+57]HAEIISR	C64H105N21O25S[M+3H]	GETVNDCHAEIISR(+H3)	534.251	48.07	5522515
2_2	2_2_01.raw	sp|P55265|DSRAD_HUMAN	P55265	ADAR	GETVNDC[+57]HAEIISR	C64H105N21O25S[M+3H]	GETVNDCHAEIISR(+H3)	534.251	48.07	2381218
2_3	2_3_01.raw	sp|P55265|DSRAD_HUMAN	P55265	ADAR	GETVNDC[+57]HAEIISR	C64H105N21O25S[M+3H]	GETVNDCHAEIISR(+H3)	534.251	48.07	3607296
3_1	3_1_01.raw	sp|P55265|DSRAD_HUMAN	P55265	ADAR	GETVNDC[+57]HAEIISR	C64H105N21O25S[M+3H]	GETVNDCHAEIISR(+H3)	534.251	48.07	5002641
3_2	3_2_01_171223210221.raw	sp|P55265|DSRAD_HUMAN	P55265	ADAR	GETVNDC[+57]HAEIISR	C64H105N21O25S[M+3H]	GETVNDCHAEIISR(+H3)	534.251	48.07	3941990
3_3	3_3_01.raw	sp|P55265|DSRAD_HUMAN	P55265	ADAR	GETVNDC[+57]HAEIISR	C64H105N21O25S[M+3H]	GETVNDCHAEIISR(+H3)	534.251	48.07	2311885
4_1	4_1_01.raw	sp|P55265|DSRAD_HUMAN	P55265	ADAR	GETVNDC[+57]HAEIISR	C64H105N21O25S[M+3H]	GETVNDCHAEIISR(+H3)	534.251	48.07	1126959
4_2	4_2_01.raw	sp|P55265|DSRAD_HUMAN	P55265	ADAR	GETVNDC[+57]HAEIISR	C64H105N21O25S[M+3H]	GETVNDCHAEIISR(+H3)	534.251	48.07	2481585
4_3	4_3_01.raw	sp|P55265|DSRAD_HUMAN	P55265	ADAR	GETVNDC[+57]HAEIISR	C64H105N21O25S[M+3H]	GETVNDCHAEIISR(+H3)	534.251	48.07	3481579
1_4	1_4_01.raw	sp|P55265|DSRAD_HUMAN	P55265	ADAR	GETVNDC[+57]HAEIISR	C64H105N21O25S[M+3H]	GETVNDCHAEIISR(+H3)	534.251	48.07	539729
1_5	1_5_01.raw	sp|P55265|DSRAD_HUMAN	P55265	ADAR	GETVNDC[+57]HAEIISR	C64H105N21O25S[M+3H]	GETVNDCHAEIISR(+H3)	534.251	48.07	4418793
1_6	1_6_01.raw	sp|P55265|DSRAD_HUMAN	P55265	ADAR	GETVNDC[+57]HAEIISR	C64H105N21O25S[M+3H]	GETVNDCHAEIISR(+H3)	534.251	48.07	5871834
2_4	2_4_01.raw	sp|P55265|DSRAD_HUMAN	P55265	ADAR	GETVNDC[+57]HAEIISR	C64H105N21O25S[M+3H]	GETVNDCHAEIISR(+H3)	534.251	48.07	4495205
2_5	2_5_01.raw	sp|P55265|DSRAD_HUMAN	P55265	ADAR	GETVNDC[+57]HAEIISR	C64H105N21O25S[M+3H]	GETVNDCHAEIISR(+H3)	534.251	48.07	6200739
2_6	2_6_01.raw	sp|P55265|DSRAD_HUMAN	P55265	ADAR	GETVNDC[+57]HAEIISR	C64H105N21O25S[M+3H]	GETVNDCHAEIISR(+H3)	534.251	48.07	5246349
3_4	3_4_01.raw	sp|P55265|DSRAD_HUMAN	P55265	ADAR	GETVNDC[+57]HAEIISR	C64H105N21O25S[M+3H]	GETVNDCHAEIISR(+H3)	534.251	48.07	3959883
3_5	3_5_01.raw	sp|P55265|DSRAD_HUMAN	P55265	ADAR	GETVNDC[+57]HAEIISR	C64H105N21O25S[M+3H]	GETVNDCHAEIISR(+H3)	534.251	48.07	3560110
3_6	3_6_01.raw	sp|P55265|DSRAD_HUMAN	P55265	ADAR	GETVNDC[+57]HAEIISR	C64H105N21O25S[M+3H]	GETVNDCHAEIISR(+H3)	534.251	48.07	2993134
4_4	4_4_01.raw	sp|P55265|DSRAD_HUMAN	P55265	ADAR	GETVNDC[+57]HAEIISR	C64H105N21O25S[M+3H]	GETVNDCHAEIISR(+H3)	534.251	48.07	2462156
4_5	4_5_01.raw	sp|P55265|DSRAD_HUMAN	P55265	ADAR	GETVNDC[+57]HAEIISR	C64H105N21O25S[M+3H]	GETVNDCHAEIISR(+H3)	534.251	48.07	1637752
4_6	4_6_01.raw	sp|P55265|DSRAD_HUMAN	P55265	ADAR	GETVNDC[+57]HAEIISR	C64H105N21O25S[M+3H]	GETVNDCHAEIISR(+H3)	534.251	48.07	3364914
1_7	1_7_01.raw	sp|P55265|DSRAD_HUMAN	P55265	ADAR	GETVNDC[+57]HAEIISR	C64H105N21O25S[M+3H]	GETVNDCHAEIISR(+H3)	534.251	48.07	1427108
1_8	1_8_01_171211223541.raw	sp|P55265|DSRAD_HUMAN	P55265	ADAR	GETVNDC[+57]HAEIISR	C64H105N21O25S[M+3H]	GETVNDCHAEIISR(+H3)	534.251	48.07	1107727
1_9	1_9_01.raw	sp|P55265|DSRAD_HUMAN	P55265	ADAR	GETVNDC[+57]HAEIISR	C64H105N21O25S[M+3H]	GETVNDCHAEIISR(+H3)	534.251	48.07	4319861
2_7	2_7_01.raw	sp|P55265|DSRAD_HUMAN	P55265	ADAR	GETVNDC[+57]HAEIISR	C64H105N21O25S[M+3H]	GETVNDCHAEIISR(+H3)	534.251	48.07	1919090
2_8	2_8_01.raw	sp|P55265|DSRAD_HUMAN	P55265	ADAR	GETVNDC[+57]HAEIISR	C64H105N21O25S[M+3H]	GETVNDCHAEIISR(+H3)	534.251	48.07	4353923
2_9	2_9_01_171217123101.raw	sp|P55265|DSRAD_HUMAN	P55265	ADAR	GETVNDC[+57]HAEIISR	C64H105N21O25S[M+3H]	GETVNDCHAEIISR(+H3)	534.251	48.07	3820989
3_7	3_7_01.raw	sp|P55265|DSRAD_HUMAN	P55265	ADAR	GETVNDC[+57]HAEIISR	C64H105N21O25S[M+3H]	GETVNDCHAEIISR(+H3)	534.251	48.07	939037
3_8	3_8_01.raw	sp|P55265|DSRAD_HUMAN	P55265	ADAR	GETVNDC[+57]HAEIISR	C64H105N21O25S[M+3H]	GETVNDCHAEIISR(+H3)	534.251	48.07	2938226
3_9	3_9_01.raw	sp|P55265|DSRAD_HUMAN	P55265	ADAR	GETVNDC[+57]HAEIISR	C64H105N21O25S[M+3H]	GETVNDCHAEIISR(+H3)	534.251	48.07	6219381
4_7	4_7_01.raw	sp|P55265|DSRAD_HUMAN	P55265	ADAR	GETVNDC[+57]HAEIISR	C64H105N21O25S[M+3H]	GETVNDCHAEIISR(+H3)	534.251	48.07	2866088
4_8	4_8_01.raw	sp|P55265|DSRAD_HUMAN	P55265	ADAR	GETVNDC[+57]HAEIISR	C64H105N21O25S[M+3H]	GETVNDCHAEIISR(+H3)	534.251	48.07	2343646
4_9	4_9_01.raw	sp|P55265|DSRAD_HUMAN	P55265	ADAR	GETVNDC[+57]HAEIISR	C64H105N21O25S[M+3H]	GETVNDCHAEIISR(+H3)	534.251	48.07	1539196
1_10	1_10_01.raw	sp|P55265|DSRAD_HUMAN	P55265	ADAR	GETVNDC[+57]HAEIISR	C64H105N21O25S[M+3H]	GETVNDCHAEIISR(+H3)	534.251	48.07	4143212
1_11	1_11_01.raw	sp|P55265|DSRAD_HUMAN	P55265	ADAR	GETVNDC[+57]HAEIISR	C64H105N21O25S[M+3H]	GETVNDCHAEIISR(+H3)	534.251	48.07	3640181
1_12	1_12_01.raw	sp|P55265|DSRAD_HUMAN	P55265	ADAR	GETVNDC[+57]HAEIISR	C64H105N21O25S[M+3H]	GETVNDCHAEIISR(+H3)	534.251	48.07	6668119
2_10	2_10_01.raw	sp|P55265|DSRAD_HUMAN	P55265	ADAR	GETVNDC[+57]HAEIISR	C64H105N21O25S[M+3H]	GETVNDCHAEIISR(+H3)	534.251	48.07	2523464
2_11	2_11_01_171223040132.raw	sp|P55265|DSRAD_HUMAN	P55265	ADAR	GETVNDC[+57]HAEIISR	C64H105N21O25S[M+3H]	GETVNDCHAEIISR(+H3)	534.251	48.07	4028818
2_12	2_12_01.raw	sp|P55265|DSRAD_HUMAN	P55265	ADAR	GETVNDC[+57]HAEIISR	C64H105N21O25S[M+3H]	GETVNDCHAEIISR(+H3)	534.251	48.07	5971730
3_10	3_10_01.raw	sp|P55265|DSRAD_HUMAN	P55265	ADAR	GETVNDC[+57]HAEIISR	C64H105N21O25S[M+3H]	GETVNDCHAEIISR(+H3)	534.251	48.07	1584738
3_11	3_11_01.raw	sp|P55265|DSRAD_HUMAN	P55265	ADAR	GETVNDC[+57]HAEIISR	C64H105N21O25S[M+3H]	GETVNDCHAEIISR(+H3)	534.251	48.07	2683765
Chromatograms	FinalList2_1.raw	sp|P55265|DSRAD_HUMANDouble-strandedRNA-specificadenosinedeaminaseOS=HomosapiensGN=ADARPE=1SV=4	P55265	ADAR	LVDQSGPPHEPK	C57H90N16O19[M+3H]	LVDQSGPPHEPK(+H3)	435.226	39.73	1377704
GPS01	GPS01_1.raw	sp|P55265|DSRAD_HUMANDouble-strandedRNA-specificadenosinedeaminaseOS=HomosapiensGN=ADARPE=1SV=4	P55265	ADAR	LVDQSGPPHEPK	C57H90N16O19[M+3H]	LVDQSGPPHEPK(+H3)	435.226	39.73	2700131
GPS02	GPS02_1.raw	sp|P55265|DSRAD_HUMANDouble-strandedRNA-specificadenosinedeaminaseOS=HomosapiensGN=ADARPE=1SV=4	P55265	ADAR	LVDQSGPPHEPK	C57H90N16O19[M+3H]	LVDQSGPPHEPK(+H3)	435.226	39.73	2639851
GPS03	GPS03_1.raw	sp|P55265|DSRAD_HUMANDouble-strandedRNA-specificadenosinedeaminaseOS=HomosapiensGN=ADARPE=1SV=4	P55265	ADAR	LVDQSGPPHEPK	C57H90N16O19[M+3H]	LVDQSGPPHEPK(+H3)	435.226	39.73	1968659
GPS04	GPS04_1.raw	sp|P55265|DSRAD_HUMANDouble-strandedRNA-specificadenosinedeaminaseOS=HomosapiensGN=ADARPE=1SV=4	P55265	ADAR	LVDQSGPPHEPK	C57H90N16O19[M+3H]	LVDQSGPPHEPK(+H3)	435.226	39.73	1790061
GPS05	GPS_05_01.raw	sp|P55265|DSRAD_HUMANDouble-strandedRNA-specificadenosinedeaminaseOS=HomosapiensGN=ADARPE=1SV=4	P55265	ADAR	LVDQSGPPHEPK	C57H90N16O19[M+3H]	LVDQSGPPHEPK(+H3)	435.226	39.73	1120483
GPS06	GPS_06_01.raw	sp|P55265|DSRAD_HUMANDouble-strandedRNA-specificadenosinedeaminaseOS=HomosapiensGN=ADARPE=1SV=4	P55265	ADAR	LVDQSGPPHEPK	C57H90N16O19[M+3H]	LVDQSGPPHEPK(+H3)	435.226	39.73	1135800
1_1	1_1_01.raw	sp|P55265|DSRAD_HUMANDouble-strandedRNA-specificadenosinedeaminaseOS=HomosapiensGN=ADARPE=1SV=4	P55265	ADAR	LVDQSGPPHEPK	C57H90N16O19[M+3H]	LVDQSGPPHEPK(+H3)	435.226	39.73	3190896
1_2	1_2_01.raw	sp|P55265|DSRAD_HUMANDouble-strandedRNA-specificadenosinedeaminaseOS=HomosapiensGN=ADARPE=1SV=4	P55265	ADAR	LVDQSGPPHEPK	C57H90N16O19[M+3H]	LVDQSGPPHEPK(+H3)	435.226	39.73	3155578
1_3	1_3_01.raw	sp|P55265|DSRAD_HUMANDouble-strandedRNA-specificadenosinedeaminaseOS=HomosapiensGN=ADARPE=1SV=4	P55265	ADAR	LVDQSGPPHEPK	C57H90N16O19[M+3H]	LVDQSGPPHEPK(+H3)	435.226	39.73	2777079
2_1	2_1_01.raw	sp|P55265|DSRAD_HUMANDouble-strandedRNA-specificadenosinedeaminaseOS=HomosapiensGN=ADARPE=1SV=4	P55265	ADAR	LVDQSGPPHEPK	C57H90N16O19[M+3H]	LVDQSGPPHEPK(+H3)	435.226	39.73	3647542
2_2	2_2_01.raw	sp|P55265|DSRAD_HUMANDouble-strandedRNA-specificadenosinedeaminaseOS=HomosapiensGN=ADARPE=1SV=4	P55265	ADAR	LVDQSGPPHEPK	C57H90N16O19[M+3H]	LVDQSGPPHEPK(+H3)	435.226	39.73	1190531
2_3	2_3_01.raw	sp|P55265|DSRAD_HUMANDouble-strandedRNA-specificadenosinedeaminaseOS=HomosapiensGN=ADARPE=1SV=4	P55265	ADAR	LVDQSGPPHEPK	C57H90N16O19[M+3H]	LVDQSGPPHEPK(+H3)	435.226	39.73	1890269
3_1	3_1_01.raw	sp|P55265|DSRAD_HUMANDouble-strandedRNA-specificadenosinedeaminaseOS=HomosapiensGN=ADARPE=1SV=4	P55265	ADAR	LVDQSGPPHEPK	C57H90N16O19[M+3H]	LVDQSGPPHEPK(+H3)	435.226	39.73	2487001
3_2	3_2_01_171223210221.raw	sp|P55265|DSRAD_HUMANDouble-strandedRNA-specificadenosinedeaminaseOS=HomosapiensGN=ADARPE=1SV=4	P55265	ADAR	LVDQSGPPHEPK	C57H90N16O19[M+3H]	LVDQSGPPHEPK(+H3)	435.226	39.73	2002399
3_3	3_3_01.raw	sp|P55265|DSRAD_HUMANDouble-strandedRNA-specificadenosinedeaminaseOS=HomosapiensGN=ADARPE=1SV=4	P55265	ADAR	LVDQSGPPHEPK	C57H90N16O19[M+3H]	LVDQSGPPHEPK(+H3)	435.226	39.73	1388105
4_1	4_1_01.raw	sp|P55265|DSRAD_HUMANDouble-strandedRNA-specificadenosinedeaminaseOS=HomosapiensGN=ADARPE=1SV=4	P55265	ADAR	LVDQSGPPHEPK	C57H90N16O19[M+3H]	LVDQSGPPHEPK(+H3)	435.226	39.73	586474
4_2	4_2_01.raw	sp|P55265|DSRAD_HUMANDouble-strandedRNA-specificadenosinedeaminaseOS=HomosapiensGN=ADARPE=1SV=4	P55265	ADAR	LVDQSGPPHEPK	C57H90N16O19[M+3H]	LVDQSGPPHEPK(+H3)	435.226	39.73	1384331
4_3	4_3_01.raw	sp|P55265|DSRAD_HUMANDouble-strandedRNA-specificadenosinedeaminaseOS=HomosapiensGN=ADARPE=1SV=4	P55265	ADAR	LVDQSGPPHEPK	C57H90N16O19[M+3H]	LVDQSGPPHEPK(+H3)	435.226	39.73	2051536
1_4	1_4_01.raw	sp|P55265|DSRAD_HUMANDouble-strandedRNA-specificadenosinedeaminaseOS=HomosapiensGN=ADARPE=1SV=4	P55265	ADAR	LVDQSGPPHEPK	C57H90N16O19[M+3H]	LVDQSGPPHEPK(+H3)	435.226	39.73	346723
1_5	1_5_01.raw	sp|P55265|DSRAD_HUMANDouble-strandedRNA-specificadenosinedeaminaseOS=HomosapiensGN=ADARPE=1SV=4	P55265	ADAR	LVDQSGPPHEPK	C57H90N16O19[M+3H]	LVDQSGPPHEPK(+H3)	435.226	39.73	3214269
1_6	1_6_01.raw	sp|P55265|DSRAD_HUMANDouble-strandedRNA-specificadenosinedeaminaseOS=HomosapiensGN=ADARPE=1SV=4	P55265	ADAR	LVDQSGPPHEPK	C57H90N16O19[M+3H]	LVDQSGPPHEPK(+H3)	435.226	39.73	3104234
2_4	2_4_01.raw	sp|P55265|DSRAD_HUMANDouble-strandedRNA-specificadenosinedeaminaseOS=HomosapiensGN=ADARPE=1SV=4	P55265	ADAR	LVDQSGPPHEPK	C57H90N16O19[M+3H]	LVDQSGPPHEPK(+H3)	435.226	39.73	1912040
2_5	2_5_01.raw	sp|P55265|DSRAD_HUMANDouble-strandedRNA-specificadenosinedeaminaseOS=HomosapiensGN=ADARPE=1SV=4	P55265	ADAR	LVDQSGPPHEPK	C57H90N16O19[M+3H]	LVDQSGPPHEPK(+H3)	435.226	39.73	2763244
2_6	2_6_01.raw	sp|P55265|DSRAD_HUMANDouble-strandedRNA-specificadenosinedeaminaseOS=HomosapiensGN=ADARPE=1SV=4	P55265	ADAR	LVDQSGPPHEPK	C57H90N16O19[M+3H]	LVDQSGPPHEPK(+H3)	435.226	39.73	3078623
3_4	3_4_01.raw	sp|P55265|DSRAD_HUMANDouble-strandedRNA-specificadenosinedeaminaseOS=HomosapiensGN=ADARPE=1SV=4	P55265	ADAR	LVDQSGPPHEPK	C57H90N16O19[M+3H]	LVDQSGPPHEPK(+H3)	435.226	39.73	1708747
3_5	3_5_01.raw	sp|P55265|DSRAD_HUMANDouble-strandedRNA-specificadenosinedeaminaseOS=HomosapiensGN=ADARPE=1SV=4	P55265	ADAR	LVDQSGPPHEPK	C57H90N16O19[M+3H]	LVDQSGPPHEPK(+H3)	435.226	39.73	1743637
3_6	3_6_01.raw	sp|P55265|DSRAD_HUMANDouble-strandedRNA-specificadenosinedeaminaseOS=HomosapiensGN=ADARPE=1SV=4	P55265	ADAR	LVDQSGPPHEPK	C57H90N16O19[M+3H]	LVDQSGPPHEPK(+H3)	435.226	39.73	1875883
4_4	4_4_01.raw	sp|P55265|DSRAD_HUMANDouble-strandedRNA-specificadenosinedeaminaseOS=HomosapiensGN=ADARPE=1SV=4	P55265	ADAR	LVDQSGPPHEPK	C57H90N16O19[M+3H]	LVDQSGPPHEPK(+H3)	435.226	39.73	1418544
4_5	4_5_01.raw	sp|P55265|DSRAD_HUMANDouble-strandedRNA-specificadenosinedeaminaseOS=HomosapiensGN=ADARPE=1SV=4	P55265	ADAR	LVDQSGPPHEPK	C57H90N16O19[M+3H]	LVDQSGPPHEPK(+H3)	435.226	39.73	1278331
4_6	4_6_01.raw	sp|P55265|DSRAD_HUMANDouble-strandedRNA-specificadenosinedeaminaseOS=HomosapiensGN=ADARPE=1SV=4	P55265	ADAR	LVDQSGPPHEPK	C57H90N16O19[M+3H]	LVDQSGPPHEPK(+H3)	435.226	39.73	1901581
1_7	1_7_01.raw	sp|P55265|DSRAD_HUMANDouble-strandedRNA-specificadenosinedeaminaseOS=HomosapiensGN=ADARPE=1SV=4	P55265	ADAR	LVDQSGPPHEPK	C57H90N16O19[M+3H]	LVDQSGPPHEPK(+H3)	435.226	39.73	835288
1_8	1_8_01_171211223541.raw	sp|P55265|DSRAD_HUMANDouble-strandedRNA-specificadenosinedeaminaseOS=HomosapiensGN=ADARPE=1SV=4	P55265	ADAR	LVDQSGPPHEPK	C57H90N16O19[M+3H]	LVDQSGPPHEPK(+H3)	435.226	39.73	670281
1_9	1_9_01.raw	sp|P55265|DSRAD_HUMANDouble-strandedRNA-specificadenosinedeaminaseOS=HomosapiensGN=ADARPE=1SV=4	P55265	ADAR	LVDQSGPPHEPK	C57H90N16O19[M+3H]	LVDQSGPPHEPK(+H3)	435.226	39.73	2632010
2_7	2_7_01.raw	sp|P55265|DSRAD_HUMANDouble-strandedRNA-specificadenosinedeaminaseOS=HomosapiensGN=ADARPE=1SV=4	P55265	ADAR	LVDQSGPPHEPK	C57H90N16O19[M+3H]	LVDQSGPPHEPK(+H3)	435.226	39.73	1021152
2_8	2_8_01.raw	sp|P55265|DSRAD_HUMANDouble-strandedRNA-specificadenosinedeaminaseOS=HomosapiensGN=ADARPE=1SV=4	P55265	ADAR	LVDQSGPPHEPK	C57H90N16O19[M+3H]	LVDQSGPPHEPK(+H3)	435.226	39.73	2832818
2_9	2_9_01_171217123101.raw	sp|P55265|DSRAD_HUMANDouble-strandedRNA-specificadenosinedeaminaseOS=HomosapiensGN=ADARPE=1SV=4	P55265	ADAR	LVDQSGPPHEPK	C57H90N16O19[M+3H]	LVDQSGPPHEPK(+H3)	435.226	39.73	1906609
3_7	3_7_01.raw	sp|P55265|DSRAD_HUMANDouble-strandedRNA-specificadenosinedeaminaseOS=HomosapiensGN=ADARPE=1SV=4	P55265	ADAR	LVDQSGPPHEPK	C57H90N16O19[M+3H]	LVDQSGPPHEPK(+H3)	435.226	39.73	512460
3_8	3_8_01.raw	sp|P55265|DSRAD_HUMANDouble-strandedRNA-specificadenosinedeaminaseOS=HomosapiensGN=ADARPE=1SV=4	P55265	ADAR	LVDQSGPPHEPK	C57H90N16O19[M+3H]	LVDQSGPPHEPK(+H3)	435.226	39.73	1257163
3_9	3_9_01.raw	sp|P55265|DSRAD_HUMANDouble-strandedRNA-specificadenosinedeaminaseOS=HomosapiensGN=ADARPE=1SV=4	P55265	ADAR	LVDQSGPPHEPK	C57H90N16O19[M+3H]	LVDQSGPPHEPK(+H3)	435.226	39.73	3164257
4_7	4_7_01.raw	sp|P55265|DSRAD_HUMANDouble-strandedRNA-specificadenosinedeaminaseOS=HomosapiensGN=ADARPE=1SV=4	P55265	ADAR	LVDQSGPPHEPK	C57H90N16O19[M+3H]	LVDQSGPPHEPK(+H3)	435.226	39.73	1860068
4_8	4_8_01.raw	sp|P55265|DSRAD_HUMANDouble-strandedRNA-specificadenosinedeaminaseOS=HomosapiensGN=ADARPE=1SV=4	P55265	ADAR	LVDQSGPPHEPK	C57H90N16O19[M+3H]	LVDQSGPPHEPK(+H3)	435.226	39.73	1073002
4_9	4_9_01.raw	sp|P55265|DSRAD_HUMANDouble-strandedRNA-specificadenosinedeaminaseOS=HomosapiensGN=ADARPE=1SV=4	P55265	ADAR	LVDQSGPPHEPK	C57H90N16O19[M+3H]	LVDQSGPPHEPK(+H3)	435.226	39.73	812485
1_10	1_10_01.raw	sp|P55265|DSRAD_HUMANDouble-strandedRNA-specificadenosinedeaminaseOS=HomosapiensGN=ADARPE=1SV=4	P55265	ADAR	LVDQSGPPHEPK	C57H90N16O19[M+3H]	LVDQSGPPHEPK(+H3)	435.226	39.73	1971816
1_11	1_11_01.raw	sp|P55265|DSRAD_HUMANDouble-strandedRNA-specificadenosinedeaminaseOS=HomosapiensGN=ADARPE=1SV=4	P55265	ADAR	LVDQSGPPHEPK	C57H90N16O19[M+3H]	LVDQSGPPHEPK(+H3)	435.226	39.73	909377
1_12	1_12_01.raw	sp|P55265|DSRAD_HUMANDouble-strandedRNA-specificadenosinedeaminaseOS=HomosapiensGN=ADARPE=1SV=4	P55265	ADAR	LVDQSGPPHEPK	C57H90N16O19[M+3H]	LVDQSGPPHEPK(+H3)	435.226	39.73	4636926
2_10	2_10_01.raw	sp|P55265|DSRAD_HUMANDouble-strandedRNA-specificadenosinedeaminaseOS=HomosapiensGN=ADARPE=1SV=4	P55265	ADAR	LVDQSGPPHEPK	C57H90N16O19[M+3H]	LVDQSGPPHEPK(+H3)	435.226	39.73	1106859
2_11	2_11_01_171223040132.raw	sp|P55265|DSRAD_HUMANDouble-strandedRNA-specificadenosinedeaminaseOS=HomosapiensGN=ADARPE=1SV=4	P55265	ADAR	LVDQSGPPHEPK	C57H90N16O19[M+3H]	LVDQSGPPHEPK(+H3)	435.226	39.73	2385465
2_12	2_12_01.raw	sp|P55265|DSRAD_HUMANDouble-strandedRNA-specificadenosinedeaminaseOS=HomosapiensGN=ADARPE=1SV=4	P55265	ADAR	LVDQSGPPHEPK	C57H90N16O19[M+3H]	LVDQSGPPHEPK(+H3)	435.226	39.73	3240811
3_10	3_10_01.raw	sp|P55265|DSRAD_HUMANDouble-strandedRNA-specificadenosinedeaminaseOS=HomosapiensGN=ADARPE=1SV=4	P55265	ADAR	LVDQSGPPHEPK	C57H90N16O19[M+3H]	LVDQSGPPHEPK(+H3)	435.226	39.73	624509
3_11	3_11_01.raw	sp|P55265|DSRAD_HUMANDouble-strandedRNA-specificadenosinedeaminaseOS=HomosapiensGN=ADARPE=1SV=4	P55265	ADAR	LVDQSGPPHEPK	C57H90N16O19[M+3H]	LVDQSGPPHEPK(+H3)	435.226	39.73	1323712
Chromatograms	FinalList2_2.raw	sp|P78563|RED1_HUMAN	P78563	ADARB1	FGDLTDNFSSPHAR	C68H98N20O23[M+3H]	FGDLTDNFSSPHAR(+H3)	521.911	65.77	966529
GPS01	GPS01_1.raw	sp|P78563|RED1_HUMAN	P78563	ADARB1	FGDLTDNFSSPHAR	C68H98N20O23[M+3H]	FGDLTDNFSSPHAR(+H3)	521.911	65.77	1521889
GPS02	GPS02_1.raw	sp|P78563|RED1_HUMAN	P78563	ADARB1	FGDLTDNFSSPHAR	C68H98N20O23[M+3H]	FGDLTDNFSSPHAR(+H3)	521.911	65.77	1432489
GPS03	GPS03_1.raw	sp|P78563|RED1_HUMAN	P78563	ADARB1	FGDLTDNFSSPHAR	C68H98N20O23[M+3H]	FGDLTDNFSSPHAR(+H3)	521.911	65.77	1014764
GPS04	GPS04_1.raw	sp|P78563|RED1_HUMAN	P78563	ADARB1	FGDLTDNFSSPHAR	C68H98N20O23[M+3H]	FGDLTDNFSSPHAR(+H3)	521.911	65.77	834278
GPS05	GPS_05_01.raw	sp|P78563|RED1_HUMAN	P78563	ADARB1	FGDLTDNFSSPHAR	C68H98N20O23[M+3H]	FGDLTDNFSSPHAR(+H3)	521.911	65.77	818928
GPS06	GPS_06_01.raw	sp|P78563|RED1_HUMAN	P78563	ADARB1	FGDLTDNFSSPHAR	C68H98N20O23[M+3H]	FGDLTDNFSSPHAR(+H3)	521.911	65.77	692569
1_1	1_1_01.raw	sp|P78563|RED1_HUMAN	P78563	ADARB1	FGDLTDNFSSPHAR	C68H98N20O23[M+3H]	FGDLTDNFSSPHAR(+H3)	521.911	65.77	1492831
1_2	1_2_01.raw	sp|P78563|RED1_HUMAN	P78563	ADARB1	FGDLTDNFSSPHAR	C68H98N20O23[M+3H]	FGDLTDNFSSPHAR(+H3)	521.911	65.77	2621667
1_3	1_3_01.raw	sp|P78563|RED1_HUMAN	P78563	ADARB1	FGDLTDNFSSPHAR	C68H98N20O23[M+3H]	FGDLTDNFSSPHAR(+H3)	521.911	65.77	1415018
2_1	2_1_01.raw	sp|P78563|RED1_HUMAN	P78563	ADARB1	FGDLTDNFSSPHAR	C68H98N20O23[M+3H]	FGDLTDNFSSPHAR(+H3)	521.911	65.77	1133997
2_2	2_2_01.raw	sp|P78563|RED1_HUMAN	P78563	ADARB1	FGDLTDNFSSPHAR	C68H98N20O23[M+3H]	FGDLTDNFSSPHAR(+H3)	521.911	65.77	709309
2_3	2_3_01.raw	sp|P78563|RED1_HUMAN	P78563	ADARB1	FGDLTDNFSSPHAR	C68H98N20O23[M+3H]	FGDLTDNFSSPHAR(+H3)	521.911	65.77	1046344
3_1	3_1_01.raw	sp|P78563|RED1_HUMAN	P78563	ADARB1	FGDLTDNFSSPHAR	C68H98N20O23[M+3H]	FGDLTDNFSSPHAR(+H3)	521.911	65.77	829302
3_2	3_2_01_171223210221.raw	sp|P78563|RED1_HUMAN	P78563	ADARB1	FGDLTDNFSSPHAR	C68H98N20O23[M+3H]	FGDLTDNFSSPHAR(+H3)	521.911	65.77	573199
3_3	3_3_01.raw	sp|P78563|RED1_HUMAN	P78563	ADARB1	FGDLTDNFSSPHAR	C68H98N20O23[M+3H]	FGDLTDNFSSPHAR(+H3)	521.911	65.77	458122
4_1	4_1_01.raw	sp|P78563|RED1_HUMAN	P78563	ADARB1	FGDLTDNFSSPHAR	C68H98N20O23[M+3H]	FGDLTDNFSSPHAR(+H3)	521.911	65.77	162571
4_2	4_2_01.raw	sp|P78563|RED1_HUMAN	P78563	ADARB1	FGDLTDNFSSPHAR	C68H98N20O23[M+3H]	FGDLTDNFSSPHAR(+H3)	521.911	65.77	698353
4_3	4_3_01.raw	sp|P78563|RED1_HUMAN	P78563	ADARB1	FGDLTDNFSSPHAR	C68H98N20O23[M+3H]	FGDLTDNFSSPHAR(+H3)	521.911	65.77	964128
1_4	1_4_01.raw	sp|P78563|RED1_HUMAN	P78563	ADARB1	FGDLTDNFSSPHAR	C68H98N20O23[M+3H]	FGDLTDNFSSPHAR(+H3)	521.911	65.77	125024
1_5	1_5_01.raw	sp|P78563|RED1_HUMAN	P78563	ADARB1	FGDLTDNFSSPHAR	C68H98N20O23[M+3H]	FGDLTDNFSSPHAR(+H3)	521.911	65.77	1395617
1_6	1_6_01.raw	sp|P78563|RED1_HUMAN	P78563	ADARB1	FGDLTDNFSSPHAR	C68H98N20O23[M+3H]	FGDLTDNFSSPHAR(+H3)	521.911	65.77	2588782
2_4	2_4_01.raw	sp|P78563|RED1_HUMAN	P78563	ADARB1	FGDLTDNFSSPHAR	C68H98N20O23[M+3H]	FGDLTDNFSSPHAR(+H3)	521.911	65.77	895332
2_5	2_5_01.raw	sp|P78563|RED1_HUMAN	P78563	ADARB1	FGDLTDNFSSPHAR	C68H98N20O23[M+3H]	FGDLTDNFSSPHAR(+H3)	521.911	65.77	1559623
2_6	2_6_01.raw	sp|P78563|RED1_HUMAN	P78563	ADARB1	FGDLTDNFSSPHAR	C68H98N20O23[M+3H]	FGDLTDNFSSPHAR(+H3)	521.911	65.77	972631
3_4	3_4_01.raw	sp|P78563|RED1_HUMAN	P78563	ADARB1	FGDLTDNFSSPHAR	C68H98N20O23[M+3H]	FGDLTDNFSSPHAR(+H3)	521.911	65.77	514888
3_5	3_5_01.raw	sp|P78563|RED1_HUMAN	P78563	ADARB1	FGDLTDNFSSPHAR	C68H98N20O23[M+3H]	FGDLTDNFSSPHAR(+H3)	521.911	65.77	728850
3_6	3_6_01.raw	sp|P78563|RED1_HUMAN	P78563	ADARB1	FGDLTDNFSSPHAR	C68H98N20O23[M+3H]	FGDLTDNFSSPHAR(+H3)	521.911	65.77	837136
4_4	4_4_01.raw	sp|P78563|RED1_HUMAN	P78563	ADARB1	FGDLTDNFSSPHAR	C68H98N20O23[M+3H]	FGDLTDNFSSPHAR(+H3)	521.911	65.77	634517
4_5	4_5_01.raw	sp|P78563|RED1_HUMAN	P78563	ADARB1	FGDLTDNFSSPHAR	C68H98N20O23[M+3H]	FGDLTDNFSSPHAR(+H3)	521.911	65.77	695969
4_6	4_6_01.raw	sp|P78563|RED1_HUMAN	P78563	ADARB1	FGDLTDNFSSPHAR	C68H98N20O23[M+3H]	FGDLTDNFSSPHAR(+H3)	521.911	65.77	873804
1_7	1_7_01.raw	sp|P78563|RED1_HUMAN	P78563	ADARB1	FGDLTDNFSSPHAR	C68H98N20O23[M+3H]	FGDLTDNFSSPHAR(+H3)	521.911	65.77	260141
1_8	1_8_01_171211223541.raw	sp|P78563|RED1_HUMAN	P78563	ADARB1	FGDLTDNFSSPHAR	C68H98N20O23[M+3H]	FGDLTDNFSSPHAR(+H3)	521.911	65.77	594848
1_9	1_9_01.raw	sp|P78563|RED1_HUMAN	P78563	ADARB1	FGDLTDNFSSPHAR	C68H98N20O23[M+3H]	FGDLTDNFSSPHAR(+H3)	521.911	65.77	1921138
2_7	2_7_01.raw	sp|P78563|RED1_HUMAN	P78563	ADARB1	FGDLTDNFSSPHAR	C68H98N20O23[M+3H]	FGDLTDNFSSPHAR(+H3)	521.911	65.77	989530
2_8	2_8_01.raw	sp|P78563|RED1_HUMAN	P78563	ADARB1	FGDLTDNFSSPHAR	C68H98N20O23[M+3H]	FGDLTDNFSSPHAR(+H3)	521.911	65.77	1407241
2_9	2_9_01_171217123101.raw	sp|P78563|RED1_HUMAN	P78563	ADARB1	FGDLTDNFSSPHAR	C68H98N20O23[M+3H]	FGDLTDNFSSPHAR(+H3)	521.911	65.77	881931
3_7	3_7_01.raw	sp|P78563|RED1_HUMAN	P78563	ADARB1	FGDLTDNFSSPHAR	C68H98N20O23[M+3H]	FGDLTDNFSSPHAR(+H3)	521.911	65.77	125865
3_8	3_8_01.raw	sp|P78563|RED1_HUMAN	P78563	ADARB1	FGDLTDNFSSPHAR	C68H98N20O23[M+3H]	FGDLTDNFSSPHAR(+H3)	521.911	65.77	423728
3_9	3_9_01.raw	sp|P78563|RED1_HUMAN	P78563	ADARB1	FGDLTDNFSSPHAR	C68H98N20O23[M+3H]	FGDLTDNFSSPHAR(+H3)	521.911	65.77	919826
4_7	4_7_01.raw	sp|P78563|RED1_HUMAN	P78563	ADARB1	FGDLTDNFSSPHAR	C68H98N20O23[M+3H]	FGDLTDNFSSPHAR(+H3)	521.911	65.77	295111
4_8	4_8_01.raw	sp|P78563|RED1_HUMAN	P78563	ADARB1	FGDLTDNFSSPHAR	C68H98N20O23[M+3H]	FGDLTDNFSSPHAR(+H3)	521.911	65.77	498402
4_9	4_9_01.raw	sp|P78563|RED1_HUMAN	P78563	ADARB1	FGDLTDNFSSPHAR	C68H98N20O23[M+3H]	FGDLTDNFSSPHAR(+H3)	521.911	65.77	742845
1_10	1_10_01.raw	sp|P78563|RED1_HUMAN	P78563	ADARB1	FGDLTDNFSSPHAR	C68H98N20O23[M+3H]	FGDLTDNFSSPHAR(+H3)	521.911	65.77	1579406
1_11	1_11_01.raw	sp|P78563|RED1_HUMAN	P78563	ADARB1	FGDLTDNFSSPHAR	C68H98N20O23[M+3H]	FGDLTDNFSSPHAR(+H3)	521.911	65.77	355907
1_12	1_12_01.raw	sp|P78563|RED1_HUMAN	P78563	ADARB1	FGDLTDNFSSPHAR	C68H98N20O23[M+3H]	FGDLTDNFSSPHAR(+H3)	521.911	65.77	2330403
2_10	2_10_01.raw	sp|P78563|RED1_HUMAN	P78563	ADARB1	FGDLTDNFSSPHAR	C68H98N20O23[M+3H]	FGDLTDNFSSPHAR(+H3)	521.911	65.77	866871
2_11	2_11_01_171223040132.raw	sp|P78563|RED1_HUMAN	P78563	ADARB1	FGDLTDNFSSPHAR	C68H98N20O23[M+3H]	FGDLTDNFSSPHAR(+H3)	521.911	65.77	1238777
2_12	2_12_01.raw	sp|P78563|RED1_HUMAN	P78563	ADARB1	FGDLTDNFSSPHAR	C68H98N20O23[M+3H]	FGDLTDNFSSPHAR(+H3)	521.911	65.77	1159910
3_10	3_10_01.raw	sp|P78563|RED1_HUMAN	P78563	ADARB1	FGDLTDNFSSPHAR	C68H98N20O23[M+3H]	FGDLTDNFSSPHAR(+H3)	521.911	65.77	389596
3_11	3_11_01.raw	sp|P78563|RED1_HUMAN	P78563	ADARB1	FGDLTDNFSSPHAR	C68H98N20O23[M+3H]	FGDLTDNFSSPHAR(+H3)	521.911	65.77	399996
Chromatograms	FinalList2_1.raw	sp|P78563|RED1_HUMAN	P78563	ADARB1	LFTAFIK	C43H66N8O9[M+2H]	LFTAFIK(+H2)	420.255	87.42	790988
GPS01	GPS01_1.raw	sp|P78563|RED1_HUMAN	P78563	ADARB1	LFTAFIK	C43H66N8O9[M+2H]	LFTAFIK(+H2)	420.255	87.42	1124458
GPS02	GPS02_1.raw	sp|P78563|RED1_HUMAN	P78563	ADARB1	LFTAFIK	C43H66N8O9[M+2H]	LFTAFIK(+H2)	420.255	87.42	843528
GPS03	GPS03_1.raw	sp|P78563|RED1_HUMAN	P78563	ADARB1	LFTAFIK	C43H66N8O9[M+2H]	LFTAFIK(+H2)	420.255	87.42	656131
GPS04	GPS04_1.raw	sp|P78563|RED1_HUMAN	P78563	ADARB1	LFTAFIK	C43H66N8O9[M+2H]	LFTAFIK(+H2)	420.255	87.42	767512
GPS05	GPS_05_01.raw	sp|P78563|RED1_HUMAN	P78563	ADARB1	LFTAFIK	C43H66N8O9[M+2H]	LFTAFIK(+H2)	420.255	87.42	613451
GPS06	GPS_06_01.raw	sp|P78563|RED1_HUMAN	P78563	ADARB1	LFTAFIK	C43H66N8O9[M+2H]	LFTAFIK(+H2)	420.255	87.42	578346
1_1	1_1_01.raw	sp|P78563|RED1_HUMAN	P78563	ADARB1	LFTAFIK	C43H66N8O9[M+2H]	LFTAFIK(+H2)	420.255	87.42	669155
1_2	1_2_01.raw	sp|P78563|RED1_HUMAN	P78563	ADARB1	LFTAFIK	C43H66N8O9[M+2H]	LFTAFIK(+H2)	420.255	87.42	1167473
1_3	1_3_01.raw	sp|P78563|RED1_HUMAN	P78563	ADARB1	LFTAFIK	C43H66N8O9[M+2H]	LFTAFIK(+H2)	420.255	87.42	1032728
2_1	2_1_01.raw	sp|P78563|RED1_HUMAN	P78563	ADARB1	LFTAFIK	C43H66N8O9[M+2H]	LFTAFIK(+H2)	420.255	87.42	748883
2_2	2_2_01.raw	sp|P78563|RED1_HUMAN	P78563	ADARB1	LFTAFIK	C43H66N8O9[M+2H]	LFTAFIK(+H2)	420.255	87.42	534497
2_3	2_3_01.raw	sp|P78563|RED1_HUMAN	P78563	ADARB1	LFTAFIK	C43H66N8O9[M+2H]	LFTAFIK(+H2)	420.255	87.42	778262
3_1	3_1_01.raw	sp|P78563|RED1_HUMAN	P78563	ADARB1	LFTAFIK	C43H66N8O9[M+2H]	LFTAFIK(+H2)	420.255	87.42	415516
3_2	3_2_01_171223210221.raw	sp|P78563|RED1_HUMAN	P78563	ADARB1	LFTAFIK	C43H66N8O9[M+2H]	LFTAFIK(+H2)	420.255	87.42	377846
3_3	3_3_01.raw	sp|P78563|RED1_HUMAN	P78563	ADARB1	LFTAFIK	C43H66N8O9[M+2H]	LFTAFIK(+H2)	420.255	87.42	211909
4_1	4_1_01.raw	sp|P78563|RED1_HUMAN	P78563	ADARB1	LFTAFIK	C43H66N8O9[M+2H]	LFTAFIK(+H2)	420.255	87.42	102062
4_2	4_2_01.raw	sp|P78563|RED1_HUMAN	P78563	ADARB1	LFTAFIK	C43H66N8O9[M+2H]	LFTAFIK(+H2)	420.255	87.42	575372
4_3	4_3_01.raw	sp|P78563|RED1_HUMAN	P78563	ADARB1	LFTAFIK	C43H66N8O9[M+2H]	LFTAFIK(+H2)	420.255	87.42	928331
1_4	1_4_01.raw	sp|P78563|RED1_HUMAN	P78563	ADARB1	LFTAFIK	C43H66N8O9[M+2H]	LFTAFIK(+H2)	420.255	87.42	85366
1_5	1_5_01.raw	sp|P78563|RED1_HUMAN	P78563	ADARB1	LFTAFIK	C43H66N8O9[M+2H]	LFTAFIK(+H2)	420.255	87.42	774953
1_6	1_6_01.raw	sp|P78563|RED1_HUMAN	P78563	ADARB1	LFTAFIK	C43H66N8O9[M+2H]	LFTAFIK(+H2)	420.255	87.42	1596657
2_4	2_4_01.raw	sp|P78563|RED1_HUMAN	P78563	ADARB1	LFTAFIK	C43H66N8O9[M+2H]	LFTAFIK(+H2)	420.255	87.42	684863
2_5	2_5_01.raw	sp|P78563|RED1_HUMAN	P78563	ADARB1	LFTAFIK	C43H66N8O9[M+2H]	LFTAFIK(+H2)	420.255	87.42	854605
2_6	2_6_01.raw	sp|P78563|RED1_HUMAN	P78563	ADARB1	LFTAFIK	C43H66N8O9[M+2H]	LFTAFIK(+H2)	420.255	87.42	655703
3_4	3_4_01.raw	sp|P78563|RED1_HUMAN	P78563	ADARB1	LFTAFIK	C43H66N8O9[M+2H]	LFTAFIK(+H2)	420.255	87.42	381087
3_5	3_5_01.raw	sp|P78563|RED1_HUMAN	P78563	ADARB1	LFTAFIK	C43H66N8O9[M+2H]	LFTAFIK(+H2)	420.255	87.42	547253
3_6	3_6_01.raw	sp|P78563|RED1_HUMAN	P78563	ADARB1	LFTAFIK	C43H66N8O9[M+2H]	LFTAFIK(+H2)	420.255	87.42	577011
4_4	4_4_01.raw	sp|P78563|RED1_HUMAN	P78563	ADARB1	LFTAFIK	C43H66N8O9[M+2H]	LFTAFIK(+H2)	420.255	87.42	223606
4_5	4_5_01.raw	sp|P78563|RED1_HUMAN	P78563	ADARB1	LFTAFIK	C43H66N8O9[M+2H]	LFTAFIK(+H2)	420.255	87.42	596449
4_6	4_6_01.raw	sp|P78563|RED1_HUMAN	P78563	ADARB1	LFTAFIK	C43H66N8O9[M+2H]	LFTAFIK(+H2)	420.255	87.42	619846
1_7	1_7_01.raw	sp|P78563|RED1_HUMAN	P78563	ADARB1	LFTAFIK	C43H66N8O9[M+2H]	LFTAFIK(+H2)	420.255	87.42	74693
1_8	1_8_01_171211223541.raw	sp|P78563|RED1_HUMAN	P78563	ADARB1	LFTAFIK	C43H66N8O9[M+2H]	LFTAFIK(+H2)	420.255	87.42	352686
1_9	1_9_01.raw	sp|P78563|RED1_HUMAN	P78563	ADARB1	LFTAFIK	C43H66N8O9[M+2H]	LFTAFIK(+H2)	420.255	87.42	915954
2_7	2_7_01.raw	sp|P78563|RED1_HUMAN	P78563	ADARB1	LFTAFIK	C43H66N8O9[M+2H]	LFTAFIK(+H2)	420.255	87.42	814626
2_8	2_8_01.raw	sp|P78563|RED1_HUMAN	P78563	ADARB1	LFTAFIK	C43H66N8O9[M+2H]	LFTAFIK(+H2)	420.255	87.42	1088442
2_9	2_9_01_171217123101.raw	sp|P78563|RED1_HUMAN	P78563	ADARB1	LFTAFIK	C43H66N8O9[M+2H]	LFTAFIK(+H2)	420.255	87.42	495882
3_7	3_7_01.raw	sp|P78563|RED1_HUMAN	P78563	ADARB1	LFTAFIK	C43H66N8O9[M+2H]	LFTAFIK(+H2)	420.255	87.42	22078
3_8	3_8_01.raw	sp|P78563|RED1_HUMAN	P78563	ADARB1	LFTAFIK	C43H66N8O9[M+2H]	LFTAFIK(+H2)	420.255	87.42	169963
3_9	3_9_01.raw	sp|P78563|RED1_HUMAN	P78563	ADARB1	LFTAFIK	C43H66N8O9[M+2H]	LFTAFIK(+H2)	420.255	87.42	665084
4_7	4_7_01.raw	sp|P78563|RED1_HUMAN	P78563	ADARB1	LFTAFIK	C43H66N8O9[M+2H]	LFTAFIK(+H2)	420.255	87.42	215211
4_8	4_8_01.raw	sp|P78563|RED1_HUMAN	P78563	ADARB1	LFTAFIK	C43H66N8O9[M+2H]	LFTAFIK(+H2)	420.255	87.42	348227
4_9	4_9_01.raw	sp|P78563|RED1_HUMAN	P78563	ADARB1	LFTAFIK	C43H66N8O9[M+2H]	LFTAFIK(+H2)	420.255	87.42	462627
1_10	1_10_01.raw	sp|P78563|RED1_HUMAN	P78563	ADARB1	LFTAFIK	C43H66N8O9[M+2H]	LFTAFIK(+H2)	420.255	87.42	1182995
1_11	1_11_01.raw	sp|P78563|RED1_HUMAN	P78563	ADARB1	LFTAFIK	C43H66N8O9[M+2H]	LFTAFIK(+H2)	420.255	87.42	168967
1_12	1_12_01.raw	sp|P78563|RED1_HUMAN	P78563	ADARB1	LFTAFIK	C43H66N8O9[M+2H]	LFTAFIK(+H2)	420.255	87.42	1878200
2_10	2_10_01.raw	sp|P78563|RED1_HUMAN	P78563	ADARB1	LFTAFIK	C43H66N8O9[M+2H]	LFTAFIK(+H2)	420.255	87.42	612173
2_11	2_11_01_171223040132.raw	sp|P78563|RED1_HUMAN	P78563	ADARB1	LFTAFIK	C43H66N8O9[M+2H]	LFTAFIK(+H2)	420.255	87.42	561390
2_12	2_12_01.raw	sp|P78563|RED1_HUMAN	P78563	ADARB1	LFTAFIK	C43H66N8O9[M+2H]	LFTAFIK(+H2)	420.255	87.42	861248
3_10	3_10_01.raw	sp|P78563|RED1_HUMAN	P78563	ADARB1	LFTAFIK	C43H66N8O9[M+2H]	LFTAFIK(+H2)	420.255	87.42	225649
3_11	3_11_01.raw	sp|P78563|RED1_HUMAN	P78563	ADARB1	LFTAFIK	C43H66N8O9[M+2H]	LFTAFIK(+H2)	420.255	87.42	92227
Chromatograms	FinalList2_1.raw	sp|P52594|AGFG1_HUMAN	P52594	AGFG1	GTPSQSPVVGR	C45H77N15O16[M+2H]	GTPSQSPVVGR(+H2)	542.791	42.07	7016693
GPS01	GPS01_1.raw	sp|P52594|AGFG1_HUMAN	P52594	AGFG1	GTPSQSPVVGR	C45H77N15O16[M+2H]	GTPSQSPVVGR(+H2)	542.791	42.07	13669996
GPS02	GPS02_1.raw	sp|P52594|AGFG1_HUMAN	P52594	AGFG1	GTPSQSPVVGR	C45H77N15O16[M+2H]	GTPSQSPVVGR(+H2)	542.791	42.07	12377688
GPS03	GPS03_1.raw	sp|P52594|AGFG1_HUMAN	P52594	AGFG1	GTPSQSPVVGR	C45H77N15O16[M+2H]	GTPSQSPVVGR(+H2)	542.791	42.07	8709595
GPS04	GPS04_1.raw	sp|P52594|AGFG1_HUMAN	P52594	AGFG1	GTPSQSPVVGR	C45H77N15O16[M+2H]	GTPSQSPVVGR(+H2)	542.791	42.07	9133575
GPS05	GPS_05_01.raw	sp|P52594|AGFG1_HUMAN	P52594	AGFG1	GTPSQSPVVGR	C45H77N15O16[M+2H]	GTPSQSPVVGR(+H2)	542.791	42.07	5822599
GPS06	GPS_06_01.raw	sp|P52594|AGFG1_HUMAN	P52594	AGFG1	GTPSQSPVVGR	C45H77N15O16[M+2H]	GTPSQSPVVGR(+H2)	542.791	42.07	5285197
1_1	1_1_01.raw	sp|P52594|AGFG1_HUMAN	P52594	AGFG1	GTPSQSPVVGR	C45H77N15O16[M+2H]	GTPSQSPVVGR(+H2)	542.791	42.07	12166628
1_2	1_2_01.raw	sp|P52594|AGFG1_HUMAN	P52594	AGFG1	GTPSQSPVVGR	C45H77N15O16[M+2H]	GTPSQSPVVGR(+H2)	542.791	42.07	16134223
1_3	1_3_01.raw	sp|P52594|AGFG1_HUMAN	P52594	AGFG1	GTPSQSPVVGR	C45H77N15O16[M+2H]	GTPSQSPVVGR(+H2)	542.791	42.07	16303493
2_1	2_1_01.raw	sp|P52594|AGFG1_HUMAN	P52594	AGFG1	GTPSQSPVVGR	C45H77N15O16[M+2H]	GTPSQSPVVGR(+H2)	542.791	42.07	5540414
2_2	2_2_01.raw	sp|P52594|AGFG1_HUMAN	P52594	AGFG1	GTPSQSPVVGR	C45H77N15O16[M+2H]	GTPSQSPVVGR(+H2)	542.791	42.07	8928550
2_3	2_3_01.raw	sp|P52594|AGFG1_HUMAN	P52594	AGFG1	GTPSQSPVVGR	C45H77N15O16[M+2H]	GTPSQSPVVGR(+H2)	542.791	42.07	15164424
3_1	3_1_01.raw	sp|P52594|AGFG1_HUMAN	P52594	AGFG1	GTPSQSPVVGR	C45H77N15O16[M+2H]	GTPSQSPVVGR(+H2)	542.791	42.07	8740982
3_2	3_2_01_171223210221.raw	sp|P52594|AGFG1_HUMAN	P52594	AGFG1	GTPSQSPVVGR	C45H77N15O16[M+2H]	GTPSQSPVVGR(+H2)	542.791	42.07	8298069
3_3	3_3_01.raw	sp|P52594|AGFG1_HUMAN	P52594	AGFG1	GTPSQSPVVGR	C45H77N15O16[M+2H]	GTPSQSPVVGR(+H2)	542.791	42.07	8138755
4_1	4_1_01.raw	sp|P52594|AGFG1_HUMAN	P52594	AGFG1	GTPSQSPVVGR	C45H77N15O16[M+2H]	GTPSQSPVVGR(+H2)	542.791	42.07	2753973
4_2	4_2_01.raw	sp|P52594|AGFG1_HUMAN	P52594	AGFG1	GTPSQSPVVGR	C45H77N15O16[M+2H]	GTPSQSPVVGR(+H2)	542.791	42.07	5856103
4_3	4_3_01.raw	sp|P52594|AGFG1_HUMAN	P52594	AGFG1	GTPSQSPVVGR	C45H77N15O16[M+2H]	GTPSQSPVVGR(+H2)	542.791	42.07	6490358
1_4	1_4_01.raw	sp|P52594|AGFG1_HUMAN	P52594	AGFG1	GTPSQSPVVGR	C45H77N15O16[M+2H]	GTPSQSPVVGR(+H2)	542.791	42.07	3952865
1_5	1_5_01.raw	sp|P52594|AGFG1_HUMAN	P52594	AGFG1	GTPSQSPVVGR	C45H77N15O16[M+2H]	GTPSQSPVVGR(+H2)	542.791	42.07	13684728
1_6	1_6_01.raw	sp|P52594|AGFG1_HUMAN	P52594	AGFG1	GTPSQSPVVGR	C45H77N15O16[M+2H]	GTPSQSPVVGR(+H2)	542.791	42.07	23616582
2_4	2_4_01.raw	sp|P52594|AGFG1_HUMAN	P52594	AGFG1	GTPSQSPVVGR	C45H77N15O16[M+2H]	GTPSQSPVVGR(+H2)	542.791	42.07	14139114
2_5	2_5_01.raw	sp|P52594|AGFG1_HUMAN	P52594	AGFG1	GTPSQSPVVGR	C45H77N15O16[M+2H]	GTPSQSPVVGR(+H2)	542.791	42.07	15492410
2_6	2_6_01.raw	sp|P52594|AGFG1_HUMAN	P52594	AGFG1	GTPSQSPVVGR	C45H77N15O16[M+2H]	GTPSQSPVVGR(+H2)	542.791	42.07	12765141
3_4	3_4_01.raw	sp|P52594|AGFG1_HUMAN	P52594	AGFG1	GTPSQSPVVGR	C45H77N15O16[M+2H]	GTPSQSPVVGR(+H2)	542.791	42.07	6246290
3_5	3_5_01.raw	sp|P52594|AGFG1_HUMAN	P52594	AGFG1	GTPSQSPVVGR	C45H77N15O16[M+2H]	GTPSQSPVVGR(+H2)	542.791	42.07	11187237
3_6	3_6_01.raw	sp|P52594|AGFG1_HUMAN	P52594	AGFG1	GTPSQSPVVGR	C45H77N15O16[M+2H]	GTPSQSPVVGR(+H2)	542.791	42.07	10744895
4_4	4_4_01.raw	sp|P52594|AGFG1_HUMAN	P52594	AGFG1	GTPSQSPVVGR	C45H77N15O16[M+2H]	GTPSQSPVVGR(+H2)	542.791	42.07	6642557
4_5	4_5_01.raw	sp|P52594|AGFG1_HUMAN	P52594	AGFG1	GTPSQSPVVGR	C45H77N15O16[M+2H]	GTPSQSPVVGR(+H2)	542.791	42.07	5553849
4_6	4_6_01.raw	sp|P52594|AGFG1_HUMAN	P52594	AGFG1	GTPSQSPVVGR	C45H77N15O16[M+2H]	GTPSQSPVVGR(+H2)	542.791	42.07	5624760
1_7	1_7_01.raw	sp|P52594|AGFG1_HUMAN	P52594	AGFG1	GTPSQSPVVGR	C45H77N15O16[M+2H]	GTPSQSPVVGR(+H2)	542.791	42.07	3307135
1_8	1_8_01_171211223541.raw	sp|P52594|AGFG1_HUMAN	P52594	AGFG1	GTPSQSPVVGR	C45H77N15O16[M+2H]	GTPSQSPVVGR(+H2)	542.791	42.07	7398377
1_9	1_9_01.raw	sp|P52594|AGFG1_HUMAN	P52594	AGFG1	GTPSQSPVVGR	C45H77N15O16[M+2H]	GTPSQSPVVGR(+H2)	542.791	42.07	14909852
2_7	2_7_01.raw	sp|P52594|AGFG1_HUMAN	P52594	AGFG1	GTPSQSPVVGR	C45H77N15O16[M+2H]	GTPSQSPVVGR(+H2)	542.791	42.07	8238102
2_8	2_8_01.raw	sp|P52594|AGFG1_HUMAN	P52594	AGFG1	GTPSQSPVVGR	C45H77N15O16[M+2H]	GTPSQSPVVGR(+H2)	542.791	42.07	14669707
2_9	2_9_01_171217123101.raw	sp|P52594|AGFG1_HUMAN	P52594	AGFG1	GTPSQSPVVGR	C45H77N15O16[M+2H]	GTPSQSPVVGR(+H2)	542.791	42.07	11411546
3_7	3_7_01.raw	sp|P52594|AGFG1_HUMAN	P52594	AGFG1	GTPSQSPVVGR	C45H77N15O16[M+2H]	GTPSQSPVVGR(+H2)	542.791	42.07	2592898
3_8	3_8_01.raw	sp|P52594|AGFG1_HUMAN	P52594	AGFG1	GTPSQSPVVGR	C45H77N15O16[M+2H]	GTPSQSPVVGR(+H2)	542.791	42.07	7896800
3_9	3_9_01.raw	sp|P52594|AGFG1_HUMAN	P52594	AGFG1	GTPSQSPVVGR	C45H77N15O16[M+2H]	GTPSQSPVVGR(+H2)	542.791	42.07	11302489
4_7	4_7_01.raw	sp|P52594|AGFG1_HUMAN	P52594	AGFG1	GTPSQSPVVGR	C45H77N15O16[M+2H]	GTPSQSPVVGR(+H2)	542.791	42.07	9361897
4_8	4_8_01.raw	sp|P52594|AGFG1_HUMAN	P52594	AGFG1	GTPSQSPVVGR	C45H77N15O16[M+2H]	GTPSQSPVVGR(+H2)	542.791	42.07	6175815
4_9	4_9_01.raw	sp|P52594|AGFG1_HUMAN	P52594	AGFG1	GTPSQSPVVGR	C45H77N15O16[M+2H]	GTPSQSPVVGR(+H2)	542.791	42.07	5702520
1_10	1_10_01.raw	sp|P52594|AGFG1_HUMAN	P52594	AGFG1	GTPSQSPVVGR	C45H77N15O16[M+2H]	GTPSQSPVVGR(+H2)	542.791	42.07	17065614
1_11	1_11_01.raw	sp|P52594|AGFG1_HUMAN	P52594	AGFG1	GTPSQSPVVGR	C45H77N15O16[M+2H]	GTPSQSPVVGR(+H2)	542.791	42.07	9319110
1_12	1_12_01.raw	sp|P52594|AGFG1_HUMAN	P52594	AGFG1	GTPSQSPVVGR	C45H77N15O16[M+2H]	GTPSQSPVVGR(+H2)	542.791	42.07	5724729
2_10	2_10_01.raw	sp|P52594|AGFG1_HUMAN	P52594	AGFG1	GTPSQSPVVGR	C45H77N15O16[M+2H]	GTPSQSPVVGR(+H2)	542.791	42.07	9763495
2_11	2_11_01_171223040132.raw	sp|P52594|AGFG1_HUMAN	P52594	AGFG1	GTPSQSPVVGR	C45H77N15O16[M+2H]	GTPSQSPVVGR(+H2)	542.791	42.07	10574578
2_12	2_12_01.raw	sp|P52594|AGFG1_HUMAN	P52594	AGFG1	GTPSQSPVVGR	C45H77N15O16[M+2H]	GTPSQSPVVGR(+H2)	542.791	42.07	8809585
3_10	3_10_01.raw	sp|P52594|AGFG1_HUMAN	P52594	AGFG1	GTPSQSPVVGR	C45H77N15O16[M+2H]	GTPSQSPVVGR(+H2)	542.791	42.07	6682376
3_11	3_11_01.raw	sp|P52594|AGFG1_HUMAN	P52594	AGFG1	GTPSQSPVVGR	C45H77N15O16[M+2H]	GTPSQSPVVGR(+H2)	542.791	42.07	5848722
Chromatograms	FinalList2_1.raw	sp|P52594|AGFG1_HUMAN	P52594	AGFG1	APVGSVVSVPSQSSASSDK	C74H125N21O30[M+2H]	APVGSVVSVPSQSSASSDK(+H2)	894.952	58.47	11234058
GPS01	GPS01_2.raw	sp|P52594|AGFG1_HUMAN	P52594	AGFG1	APVGSVVSVPSQSSASSDK	C74H125N21O30[M+2H]	APVGSVVSVPSQSSASSDK(+H2)	894.952	58.47	26554674
GPS02	GPS02_2.raw	sp|P52594|AGFG1_HUMAN	P52594	AGFG1	APVGSVVSVPSQSSASSDK	C74H125N21O30[M+2H]	APVGSVVSVPSQSSASSDK(+H2)	894.952	58.47	23532808
GPS03	GPS03_2.raw	sp|P52594|AGFG1_HUMAN	P52594	AGFG1	APVGSVVSVPSQSSASSDK	C74H125N21O30[M+2H]	APVGSVVSVPSQSSASSDK(+H2)	894.952	58.47	19224720
GPS04	GPS04_2.raw	sp|P52594|AGFG1_HUMAN	P52594	AGFG1	APVGSVVSVPSQSSASSDK	C74H125N21O30[M+2H]	APVGSVVSVPSQSSASSDK(+H2)	894.952	58.47	19364346
GPS05	GPS_05_02.raw	sp|P52594|AGFG1_HUMAN	P52594	AGFG1	APVGSVVSVPSQSSASSDK	C74H125N21O30[M+2H]	APVGSVVSVPSQSSASSDK(+H2)	894.952	58.47	13341198
GPS06	GPS_06_02.raw	sp|P52594|AGFG1_HUMAN	P52594	AGFG1	APVGSVVSVPSQSSASSDK	C74H125N21O30[M+2H]	APVGSVVSVPSQSSASSDK(+H2)	894.952	58.47	11526739
1_1	1_1_02.raw	sp|P52594|AGFG1_HUMAN	P52594	AGFG1	APVGSVVSVPSQSSASSDK	C74H125N21O30[M+2H]	APVGSVVSVPSQSSASSDK(+H2)	894.952	58.47	25244022
1_2	1_2_02.raw	sp|P52594|AGFG1_HUMAN	P52594	AGFG1	APVGSVVSVPSQSSASSDK	C74H125N21O30[M+2H]	APVGSVVSVPSQSSASSDK(+H2)	894.952	58.47	26890220
1_3	1_3_02.raw	sp|P52594|AGFG1_HUMAN	P52594	AGFG1	APVGSVVSVPSQSSASSDK	C74H125N21O30[M+2H]	APVGSVVSVPSQSSASSDK(+H2)	894.952	58.47	33531694
2_1	2_1_02.raw	sp|P52594|AGFG1_HUMAN	P52594	AGFG1	APVGSVVSVPSQSSASSDK	C74H125N21O30[M+2H]	APVGSVVSVPSQSSASSDK(+H2)	894.952	58.47	11280600
2_2	2_2_02.raw	sp|P52594|AGFG1_HUMAN	P52594	AGFG1	APVGSVVSVPSQSSASSDK	C74H125N21O30[M+2H]	APVGSVVSVPSQSSASSDK(+H2)	894.952	58.47	15904386
2_3	2_3_02.raw	sp|P52594|AGFG1_HUMAN	P52594	AGFG1	APVGSVVSVPSQSSASSDK	C74H125N21O30[M+2H]	APVGSVVSVPSQSSASSDK(+H2)	894.952	58.47	31695058
3_1	3_1_02.raw	sp|P52594|AGFG1_HUMAN	P52594	AGFG1	APVGSVVSVPSQSSASSDK	C74H125N21O30[M+2H]	APVGSVVSVPSQSSASSDK(+H2)	894.952	58.47	18425808
3_2	3_2_02.raw	sp|P52594|AGFG1_HUMAN	P52594	AGFG1	APVGSVVSVPSQSSASSDK	C74H125N21O30[M+2H]	APVGSVVSVPSQSSASSDK(+H2)	894.952	58.47	16584032
3_3	3_3_02.raw	sp|P52594|AGFG1_HUMAN	P52594	AGFG1	APVGSVVSVPSQSSASSDK	C74H125N21O30[M+2H]	APVGSVVSVPSQSSASSDK(+H2)	894.952	58.47	11147528
4_1	4_1_02.raw	sp|P52594|AGFG1_HUMAN	P52594	AGFG1	APVGSVVSVPSQSSASSDK	C74H125N21O30[M+2H]	APVGSVVSVPSQSSASSDK(+H2)	894.952	58.47	10319707
4_2	4_2_02.raw	sp|P52594|AGFG1_HUMAN	P52594	AGFG1	APVGSVVSVPSQSSASSDK	C74H125N21O30[M+2H]	APVGSVVSVPSQSSASSDK(+H2)	894.952	58.47	8659609
4_3	4_3_02.raw	sp|P52594|AGFG1_HUMAN	P52594	AGFG1	APVGSVVSVPSQSSASSDK	C74H125N21O30[M+2H]	APVGSVVSVPSQSSASSDK(+H2)	894.952	58.47	10622778
1_4	1_4_02.raw	sp|P52594|AGFG1_HUMAN	P52594	AGFG1	APVGSVVSVPSQSSASSDK	C74H125N21O30[M+2H]	APVGSVVSVPSQSSASSDK(+H2)	894.952	58.47	8624887
1_5	1_5_02.raw	sp|P52594|AGFG1_HUMAN	P52594	AGFG1	APVGSVVSVPSQSSASSDK	C74H125N21O30[M+2H]	APVGSVVSVPSQSSASSDK(+H2)	894.952	58.47	24657056
1_6	1_6_02.raw	sp|P52594|AGFG1_HUMAN	P52594	AGFG1	APVGSVVSVPSQSSASSDK	C74H125N21O30[M+2H]	APVGSVVSVPSQSSASSDK(+H2)	894.952	58.47	47573204
2_4	2_4_02.raw	sp|P52594|AGFG1_HUMAN	P52594	AGFG1	APVGSVVSVPSQSSASSDK	C74H125N21O30[M+2H]	APVGSVVSVPSQSSASSDK(+H2)	894.952	58.47	25142408
2_5	2_5_02.raw	sp|P52594|AGFG1_HUMAN	P52594	AGFG1	APVGSVVSVPSQSSASSDK	C74H125N21O30[M+2H]	APVGSVVSVPSQSSASSDK(+H2)	894.952	58.47	31197362
2_6	2_6_02.raw	sp|P52594|AGFG1_HUMAN	P52594	AGFG1	APVGSVVSVPSQSSASSDK	C74H125N21O30[M+2H]	APVGSVVSVPSQSSASSDK(+H2)	894.952	58.47	24419496
3_4	3_4_02.raw	sp|P52594|AGFG1_HUMAN	P52594	AGFG1	APVGSVVSVPSQSSASSDK	C74H125N21O30[M+2H]	APVGSVVSVPSQSSASSDK(+H2)	894.952	58.47	10049385
3_5	3_5_02.raw	sp|P52594|AGFG1_HUMAN	P52594	AGFG1	APVGSVVSVPSQSSASSDK	C74H125N21O30[M+2H]	APVGSVVSVPSQSSASSDK(+H2)	894.952	58.47	21722636
3_6	3_6_02.raw	sp|P52594|AGFG1_HUMAN	P52594	AGFG1	APVGSVVSVPSQSSASSDK	C74H125N21O30[M+2H]	APVGSVVSVPSQSSASSDK(+H2)	894.952	58.47	19678434
4_4	4_4_02.raw	sp|P52594|AGFG1_HUMAN	P52594	AGFG1	APVGSVVSVPSQSSASSDK	C74H125N21O30[M+2H]	APVGSVVSVPSQSSASSDK(+H2)	894.952	58.47	9206575
4_5	4_5_02.raw	sp|P52594|AGFG1_HUMAN	P52594	AGFG1	APVGSVVSVPSQSSASSDK	C74H125N21O30[M+2H]	APVGSVVSVPSQSSASSDK(+H2)	894.952	58.47	9078696
4_6	4_6_02.raw	sp|P52594|AGFG1_HUMAN	P52594	AGFG1	APVGSVVSVPSQSSASSDK	C74H125N21O30[M+2H]	APVGSVVSVPSQSSASSDK(+H2)	894.952	58.47	10918936
1_7	1_7_02.raw	sp|P52594|AGFG1_HUMAN	P52594	AGFG1	APVGSVVSVPSQSSASSDK	C74H125N21O30[M+2H]	APVGSVVSVPSQSSASSDK(+H2)	894.952	58.47	8475168
1_8	1_8_02.raw	sp|P52594|AGFG1_HUMAN	P52594	AGFG1	APVGSVVSVPSQSSASSDK	C74H125N21O30[M+2H]	APVGSVVSVPSQSSASSDK(+H2)	894.952	58.47	15496868
1_9	1_9_02.raw	sp|P52594|AGFG1_HUMAN	P52594	AGFG1	APVGSVVSVPSQSSASSDK	C74H125N21O30[M+2H]	APVGSVVSVPSQSSASSDK(+H2)	894.952	58.47	32193394
2_7	2_7_02.raw	sp|P52594|AGFG1_HUMAN	P52594	AGFG1	APVGSVVSVPSQSSASSDK	C74H125N21O30[M+2H]	APVGSVVSVPSQSSASSDK(+H2)	894.952	58.47	17519444
2_8	2_8_02.raw	sp|P52594|AGFG1_HUMAN	P52594	AGFG1	APVGSVVSVPSQSSASSDK	C74H125N21O30[M+2H]	APVGSVVSVPSQSSASSDK(+H2)	894.952	58.47	24389052
2_9	2_9_02_171217160937.raw	sp|P52594|AGFG1_HUMAN	P52594	AGFG1	APVGSVVSVPSQSSASSDK	C74H125N21O30[M+2H]	APVGSVVSVPSQSSASSDK(+H2)	894.952	58.47	19583916
3_7	3_7_02.raw	sp|P52594|AGFG1_HUMAN	P52594	AGFG1	APVGSVVSVPSQSSASSDK	C74H125N21O30[M+2H]	APVGSVVSVPSQSSASSDK(+H2)	894.952	58.47	5402707
3_8	3_8_02.raw	sp|P52594|AGFG1_HUMAN	P52594	AGFG1	APVGSVVSVPSQSSASSDK	C74H125N21O30[M+2H]	APVGSVVSVPSQSSASSDK(+H2)	894.952	58.47	12613021
3_9	3_9_02.raw	sp|P52594|AGFG1_HUMAN	P52594	AGFG1	APVGSVVSVPSQSSASSDK	C74H125N21O30[M+2H]	APVGSVVSVPSQSSASSDK(+H2)	894.952	58.47	20725988
4_7	4_7_02.raw	sp|P52594|AGFG1_HUMAN	P52594	AGFG1	APVGSVVSVPSQSSASSDK	C74H125N21O30[M+2H]	APVGSVVSVPSQSSASSDK(+H2)	894.952	58.47	13250008
4_8	4_8_02.raw	sp|P52594|AGFG1_HUMAN	P52594	AGFG1	APVGSVVSVPSQSSASSDK	C74H125N21O30[M+2H]	APVGSVVSVPSQSSASSDK(+H2)	894.952	58.47	564
4_9	4_9_02.raw	sp|P52594|AGFG1_HUMAN	P52594	AGFG1	APVGSVVSVPSQSSASSDK	C74H125N21O30[M+2H]	APVGSVVSVPSQSSASSDK(+H2)	894.952	58.47	11915386
1_10	1_10_02.raw	sp|P52594|AGFG1_HUMAN	P52594	AGFG1	APVGSVVSVPSQSSASSDK	C74H125N21O30[M+2H]	APVGSVVSVPSQSSASSDK(+H2)	894.952	58.47	29057282
1_11	1_11_02.raw	sp|P52594|AGFG1_HUMAN	P52594	AGFG1	APVGSVVSVPSQSSASSDK	C74H125N21O30[M+2H]	APVGSVVSVPSQSSASSDK(+H2)	894.952	58.47	14755840
1_12	1_12_02.raw	sp|P52594|AGFG1_HUMAN	P52594	AGFG1	APVGSVVSVPSQSSASSDK	C74H125N21O30[M+2H]	APVGSVVSVPSQSSASSDK(+H2)	894.952	58.47	13429737
2_10	2_10_02.raw	sp|P52594|AGFG1_HUMAN	P52594	AGFG1	APVGSVVSVPSQSSASSDK	C74H125N21O30[M+2H]	APVGSVVSVPSQSSASSDK(+H2)	894.952	58.47	19646762
2_11	2_11_02.raw	sp|P52594|AGFG1_HUMAN	P52594	AGFG1	APVGSVVSVPSQSSASSDK	C74H125N21O30[M+2H]	APVGSVVSVPSQSSASSDK(+H2)	894.952	58.47	20980690
2_12	2_12_02.raw	sp|P52594|AGFG1_HUMAN	P52594	AGFG1	APVGSVVSVPSQSSASSDK	C74H125N21O30[M+2H]	APVGSVVSVPSQSSASSDK(+H2)	894.952	58.47	22891226
3_10	3_10_02.raw	sp|P52594|AGFG1_HUMAN	P52594	AGFG1	APVGSVVSVPSQSSASSDK	C74H125N21O30[M+2H]	APVGSVVSVPSQSSASSDK(+H2)	894.952	58.47	7227106
3_11	3_11_02.raw	sp|P52594|AGFG1_HUMAN	P52594	AGFG1	APVGSVVSVPSQSSASSDK	C74H125N21O30[M+2H]	APVGSVVSVPSQSSASSDK(+H2)	894.952	58.47	8941726
Chromatograms	FinalList2_2.raw	sp|Q92667|AKAP1_HUMAN	Q92667	AKAP1	VC[+57]QASQLQGQK	C50H87N17O18S[M+2H]	VCQASQLQGQK(+H2)	623.814	38.88	274362
GPS01	GPS01_2.raw	sp|Q92667|AKAP1_HUMAN	Q92667	AKAP1	VC[+57]QASQLQGQK	C50H87N17O18S[M+2H]	VCQASQLQGQK(+H2)	623.814	38.88	414572
GPS02	GPS02_2.raw	sp|Q92667|AKAP1_HUMAN	Q92667	AKAP1	VC[+57]QASQLQGQK	C50H87N17O18S[M+2H]	VCQASQLQGQK(+H2)	623.814	38.88	429964
GPS03	GPS03_2.raw	sp|Q92667|AKAP1_HUMAN	Q92667	AKAP1	VC[+57]QASQLQGQK	C50H87N17O18S[M+2H]	VCQASQLQGQK(+H2)	623.814	38.88	324336
GPS04	GPS04_2.raw	sp|Q92667|AKAP1_HUMAN	Q92667	AKAP1	VC[+57]QASQLQGQK	C50H87N17O18S[M+2H]	VCQASQLQGQK(+H2)	623.814	38.88	333893
GPS05	GPS_05_02.raw	sp|Q92667|AKAP1_HUMAN	Q92667	AKAP1	VC[+57]QASQLQGQK	C50H87N17O18S[M+2H]	VCQASQLQGQK(+H2)	623.814	38.88	209970
GPS06	GPS_06_02.raw	sp|Q92667|AKAP1_HUMAN	Q92667	AKAP1	VC[+57]QASQLQGQK	C50H87N17O18S[M+2H]	VCQASQLQGQK(+H2)	623.814	38.88	227140
1_1	1_1_02.raw	sp|Q92667|AKAP1_HUMAN	Q92667	AKAP1	VC[+57]QASQLQGQK	C50H87N17O18S[M+2H]	VCQASQLQGQK(+H2)	623.814	38.88	606486
1_2	1_2_02.raw	sp|Q92667|AKAP1_HUMAN	Q92667	AKAP1	VC[+57]QASQLQGQK	C50H87N17O18S[M+2H]	VCQASQLQGQK(+H2)	623.814	38.88	505504
1_3	1_3_02.raw	sp|Q92667|AKAP1_HUMAN	Q92667	AKAP1	VC[+57]QASQLQGQK	C50H87N17O18S[M+2H]	VCQASQLQGQK(+H2)	623.814	38.88	504776
2_1	2_1_02.raw	sp|Q92667|AKAP1_HUMAN	Q92667	AKAP1	VC[+57]QASQLQGQK	C50H87N17O18S[M+2H]	VCQASQLQGQK(+H2)	623.814	38.88	250207
2_2	2_2_02.raw	sp|Q92667|AKAP1_HUMAN	Q92667	AKAP1	VC[+57]QASQLQGQK	C50H87N17O18S[M+2H]	VCQASQLQGQK(+H2)	623.814	38.88	351207
2_3	2_3_02.raw	sp|Q92667|AKAP1_HUMAN	Q92667	AKAP1	VC[+57]QASQLQGQK	C50H87N17O18S[M+2H]	VCQASQLQGQK(+H2)	623.814	38.88	705557
3_1	3_1_02.raw	sp|Q92667|AKAP1_HUMAN	Q92667	AKAP1	VC[+57]QASQLQGQK	C50H87N17O18S[M+2H]	VCQASQLQGQK(+H2)	623.814	38.88	320434
3_2	3_2_02.raw	sp|Q92667|AKAP1_HUMAN	Q92667	AKAP1	VC[+57]QASQLQGQK	C50H87N17O18S[M+2H]	VCQASQLQGQK(+H2)	623.814	38.88	498323
3_3	3_3_02.raw	sp|Q92667|AKAP1_HUMAN	Q92667	AKAP1	VC[+57]QASQLQGQK	C50H87N17O18S[M+2H]	VCQASQLQGQK(+H2)	623.814	38.88	272370
4_1	4_1_02.raw	sp|Q92667|AKAP1_HUMAN	Q92667	AKAP1	VC[+57]QASQLQGQK	C50H87N17O18S[M+2H]	VCQASQLQGQK(+H2)	623.814	38.88	229802
4_2	4_2_02.raw	sp|Q92667|AKAP1_HUMAN	Q92667	AKAP1	VC[+57]QASQLQGQK	C50H87N17O18S[M+2H]	VCQASQLQGQK(+H2)	623.814	38.88	165362
4_3	4_3_02.raw	sp|Q92667|AKAP1_HUMAN	Q92667	AKAP1	VC[+57]QASQLQGQK	C50H87N17O18S[M+2H]	VCQASQLQGQK(+H2)	623.814	38.88	166092
1_4	1_4_02.raw	sp|Q92667|AKAP1_HUMAN	Q92667	AKAP1	VC[+57]QASQLQGQK	C50H87N17O18S[M+2H]	VCQASQLQGQK(+H2)	623.814	38.88	304785
1_5	1_5_02.raw	sp|Q92667|AKAP1_HUMAN	Q92667	AKAP1	VC[+57]QASQLQGQK	C50H87N17O18S[M+2H]	VCQASQLQGQK(+H2)	623.814	38.88	441691
1_6	1_6_02.raw	sp|Q92667|AKAP1_HUMAN	Q92667	AKAP1	VC[+57]QASQLQGQK	C50H87N17O18S[M+2H]	VCQASQLQGQK(+H2)	623.814	38.88	774817
2_4	2_4_02.raw	sp|Q92667|AKAP1_HUMAN	Q92667	AKAP1	VC[+57]QASQLQGQK	C50H87N17O18S[M+2H]	VCQASQLQGQK(+H2)	623.814	38.88	709409
2_5	2_5_02.raw	sp|Q92667|AKAP1_HUMAN	Q92667	AKAP1	VC[+57]QASQLQGQK	C50H87N17O18S[M+2H]	VCQASQLQGQK(+H2)	623.814	38.88	733963
2_6	2_6_02.raw	sp|Q92667|AKAP1_HUMAN	Q92667	AKAP1	VC[+57]QASQLQGQK	C50H87N17O18S[M+2H]	VCQASQLQGQK(+H2)	623.814	38.88	659125
3_4	3_4_02.raw	sp|Q92667|AKAP1_HUMAN	Q92667	AKAP1	VC[+57]QASQLQGQK	C50H87N17O18S[M+2H]	VCQASQLQGQK(+H2)	623.814	38.88	454132
3_5	3_5_02.raw	sp|Q92667|AKAP1_HUMAN	Q92667	AKAP1	VC[+57]QASQLQGQK	C50H87N17O18S[M+2H]	VCQASQLQGQK(+H2)	623.814	38.88	541317
3_6	3_6_02.raw	sp|Q92667|AKAP1_HUMAN	Q92667	AKAP1	VC[+57]QASQLQGQK	C50H87N17O18S[M+2H]	VCQASQLQGQK(+H2)	623.814	38.88	293280
4_4	4_4_02.raw	sp|Q92667|AKAP1_HUMAN	Q92667	AKAP1	VC[+57]QASQLQGQK	C50H87N17O18S[M+2H]	VCQASQLQGQK(+H2)	623.814	38.88	200540
4_5	4_5_02.raw	sp|Q92667|AKAP1_HUMAN	Q92667	AKAP1	VC[+57]QASQLQGQK	C50H87N17O18S[M+2H]	VCQASQLQGQK(+H2)	623.814	38.88	136856
4_6	4_6_02.raw	sp|Q92667|AKAP1_HUMAN	Q92667	AKAP1	VC[+57]QASQLQGQK	C50H87N17O18S[M+2H]	VCQASQLQGQK(+H2)	623.814	38.88	189642
1_7	1_7_02.raw	sp|Q92667|AKAP1_HUMAN	Q92667	AKAP1	VC[+57]QASQLQGQK	C50H87N17O18S[M+2H]	VCQASQLQGQK(+H2)	623.814	38.88	466806
1_8	1_8_02.raw	sp|Q92667|AKAP1_HUMAN	Q92667	AKAP1	VC[+57]QASQLQGQK	C50H87N17O18S[M+2H]	VCQASQLQGQK(+H2)	623.814	38.88	256565
1_9	1_9_02.raw	sp|Q92667|AKAP1_HUMAN	Q92667	AKAP1	VC[+57]QASQLQGQK	C50H87N17O18S[M+2H]	VCQASQLQGQK(+H2)	623.814	38.88	560908
2_7	2_7_02.raw	sp|Q92667|AKAP1_HUMAN	Q92667	AKAP1	VC[+57]QASQLQGQK	C50H87N17O18S[M+2H]	VCQASQLQGQK(+H2)	623.814	38.88	274704
2_8	2_8_02.raw	sp|Q92667|AKAP1_HUMAN	Q92667	AKAP1	VC[+57]QASQLQGQK	C50H87N17O18S[M+2H]	VCQASQLQGQK(+H2)	623.814	38.88	674603
2_9	2_9_02_171217160937.raw	sp|Q92667|AKAP1_HUMAN	Q92667	AKAP1	VC[+57]QASQLQGQK	C50H87N17O18S[M+2H]	VCQASQLQGQK(+H2)	623.814	38.88	770498
3_7	3_7_02.raw	sp|Q92667|AKAP1_HUMAN	Q92667	AKAP1	VC[+57]QASQLQGQK	C50H87N17O18S[M+2H]	VCQASQLQGQK(+H2)	623.814	38.88	265709
3_8	3_8_02.raw	sp|Q92667|AKAP1_HUMAN	Q92667	AKAP1	VC[+57]QASQLQGQK	C50H87N17O18S[M+2H]	VCQASQLQGQK(+H2)	623.814	38.88	296848
3_9	3_9_02.raw	sp|Q92667|AKAP1_HUMAN	Q92667	AKAP1	VC[+57]QASQLQGQK	C50H87N17O18S[M+2H]	VCQASQLQGQK(+H2)	623.814	38.88	396639
4_7	4_7_02.raw	sp|Q92667|AKAP1_HUMAN	Q92667	AKAP1	VC[+57]QASQLQGQK	C50H87N17O18S[M+2H]	VCQASQLQGQK(+H2)	623.814	38.88	343748
4_8	4_8_02.raw	sp|Q92667|AKAP1_HUMAN	Q92667	AKAP1	VC[+57]QASQLQGQK	C50H87N17O18S[M+2H]	VCQASQLQGQK(+H2)	623.814	38.88	186032
4_9	4_9_02.raw	sp|Q92667|AKAP1_HUMAN	Q92667	AKAP1	VC[+57]QASQLQGQK	C50H87N17O18S[M+2H]	VCQASQLQGQK(+H2)	623.814	38.88	181014
1_10	1_10_02.raw	sp|Q92667|AKAP1_HUMAN	Q92667	AKAP1	VC[+57]QASQLQGQK	C50H87N17O18S[M+2H]	VCQASQLQGQK(+H2)	623.814	38.88	722315
1_11	1_11_02.raw	sp|Q92667|AKAP1_HUMAN	Q92667	AKAP1	VC[+57]QASQLQGQK	C50H87N17O18S[M+2H]	VCQASQLQGQK(+H2)	623.814	38.88	447583
1_12	1_12_02.raw	sp|Q92667|AKAP1_HUMAN	Q92667	AKAP1	VC[+57]QASQLQGQK	C50H87N17O18S[M+2H]	VCQASQLQGQK(+H2)	623.814	38.88	72253
2_10	2_10_02.raw	sp|Q92667|AKAP1_HUMAN	Q92667	AKAP1	VC[+57]QASQLQGQK	C50H87N17O18S[M+2H]	VCQASQLQGQK(+H2)	623.814	38.88	428128
2_11	2_11_02.raw	sp|Q92667|AKAP1_HUMAN	Q92667	AKAP1	VC[+57]QASQLQGQK	C50H87N17O18S[M+2H]	VCQASQLQGQK(+H2)	623.814	38.88	331853
2_12	2_12_02.raw	sp|Q92667|AKAP1_HUMAN	Q92667	AKAP1	VC[+57]QASQLQGQK	C50H87N17O18S[M+2H]	VCQASQLQGQK(+H2)	623.814	38.88	341344
3_10	3_10_02.raw	sp|Q92667|AKAP1_HUMAN	Q92667	AKAP1	VC[+57]QASQLQGQK	C50H87N17O18S[M+2H]	VCQASQLQGQK(+H2)	623.814	38.88	204719
3_11	3_11_02.raw	sp|Q92667|AKAP1_HUMAN	Q92667	AKAP1	VC[+57]QASQLQGQK	C50H87N17O18S[M+2H]	VCQASQLQGQK(+H2)	623.814	38.88	236470
Chromatograms	FinalList2_1.raw	sp|O43823|AKAP8_HUMAN	O43823	AKAP8	VAPAPAAADAEVEQTDAESK	C82H132N22O34[M+2H]	VAPAPAAADAEVEQTDAESK(+H2)	985.471	55.18	120173
GPS01	GPS01_1.raw	sp|O43823|AKAP8_HUMAN	O43823	AKAP8	VAPAPAAADAEVEQTDAESK	C82H132N22O34[M+2H]	VAPAPAAADAEVEQTDAESK(+H2)	985.471	55.18	765411
GPS02	GPS02_1.raw	sp|O43823|AKAP8_HUMAN	O43823	AKAP8	VAPAPAAADAEVEQTDAESK	C82H132N22O34[M+2H]	VAPAPAAADAEVEQTDAESK(+H2)	985.471	55.18	661866
GPS03	GPS03_1.raw	sp|O43823|AKAP8_HUMAN	O43823	AKAP8	VAPAPAAADAEVEQTDAESK	C82H132N22O34[M+2H]	VAPAPAAADAEVEQTDAESK(+H2)	985.471	55.18	324479
GPS04	GPS04_1.raw	sp|O43823|AKAP8_HUMAN	O43823	AKAP8	VAPAPAAADAEVEQTDAESK	C82H132N22O34[M+2H]	VAPAPAAADAEVEQTDAESK(+H2)	985.471	55.18	311657
GPS05	GPS_05_01.raw	sp|O43823|AKAP8_HUMAN	O43823	AKAP8	VAPAPAAADAEVEQTDAESK	C82H132N22O34[M+2H]	VAPAPAAADAEVEQTDAESK(+H2)	985.471	55.18	323745
GPS06	GPS_06_01.raw	sp|O43823|AKAP8_HUMAN	O43823	AKAP8	VAPAPAAADAEVEQTDAESK	C82H132N22O34[M+2H]	VAPAPAAADAEVEQTDAESK(+H2)	985.471	55.18	253269
1_1	1_1_01.raw	sp|O43823|AKAP8_HUMAN	O43823	AKAP8	VAPAPAAADAEVEQTDAESK	C82H132N22O34[M+2H]	VAPAPAAADAEVEQTDAESK(+H2)	985.471	55.18	1098850
1_2	1_2_01.raw	sp|O43823|AKAP8_HUMAN	O43823	AKAP8	VAPAPAAADAEVEQTDAESK	C82H132N22O34[M+2H]	VAPAPAAADAEVEQTDAESK(+H2)	985.471	55.18	416967
1_3	1_3_01.raw	sp|O43823|AKAP8_HUMAN	O43823	AKAP8	VAPAPAAADAEVEQTDAESK	C82H132N22O34[M+2H]	VAPAPAAADAEVEQTDAESK(+H2)	985.471	55.18	746265
2_1	2_1_01.raw	sp|O43823|AKAP8_HUMAN	O43823	AKAP8	VAPAPAAADAEVEQTDAESK	C82H132N22O34[M+2H]	VAPAPAAADAEVEQTDAESK(+H2)	985.471	55.18	354827
2_2	2_2_01.raw	sp|O43823|AKAP8_HUMAN	O43823	AKAP8	VAPAPAAADAEVEQTDAESK	C82H132N22O34[M+2H]	VAPAPAAADAEVEQTDAESK(+H2)	985.471	55.18	70231
2_3	2_3_01.raw	sp|O43823|AKAP8_HUMAN	O43823	AKAP8	VAPAPAAADAEVEQTDAESK	C82H132N22O34[M+2H]	VAPAPAAADAEVEQTDAESK(+H2)	985.471	55.18	87448
3_1	3_1_01.raw	sp|O43823|AKAP8_HUMAN	O43823	AKAP8	VAPAPAAADAEVEQTDAESK	C82H132N22O34[M+2H]	VAPAPAAADAEVEQTDAESK(+H2)	985.471	55.18	267150
3_2	3_2_01_171223210221.raw	sp|O43823|AKAP8_HUMAN	O43823	AKAP8	VAPAPAAADAEVEQTDAESK	C82H132N22O34[M+2H]	VAPAPAAADAEVEQTDAESK(+H2)	985.471	55.18	548583
3_3	3_3_01.raw	sp|O43823|AKAP8_HUMAN	O43823	AKAP8	VAPAPAAADAEVEQTDAESK	C82H132N22O34[M+2H]	VAPAPAAADAEVEQTDAESK(+H2)	985.471	55.18	157642
4_1	4_1_01.raw	sp|O43823|AKAP8_HUMAN	O43823	AKAP8	VAPAPAAADAEVEQTDAESK	C82H132N22O34[M+2H]	VAPAPAAADAEVEQTDAESK(+H2)	985.471	55.18	3420
4_2	4_2_01.raw	sp|O43823|AKAP8_HUMAN	O43823	AKAP8	VAPAPAAADAEVEQTDAESK	C82H132N22O34[M+2H]	VAPAPAAADAEVEQTDAESK(+H2)	985.471	55.18	113060
4_3	4_3_01.raw	sp|O43823|AKAP8_HUMAN	O43823	AKAP8	VAPAPAAADAEVEQTDAESK	C82H132N22O34[M+2H]	VAPAPAAADAEVEQTDAESK(+H2)	985.471	55.18	255659
1_4	1_4_01.raw	sp|O43823|AKAP8_HUMAN	O43823	AKAP8	VAPAPAAADAEVEQTDAESK	C82H132N22O34[M+2H]	VAPAPAAADAEVEQTDAESK(+H2)	985.471	55.18	40973
1_5	1_5_01.raw	sp|O43823|AKAP8_HUMAN	O43823	AKAP8	VAPAPAAADAEVEQTDAESK	C82H132N22O34[M+2H]	VAPAPAAADAEVEQTDAESK(+H2)	985.471	55.18	461184
1_6	1_6_01.raw	sp|O43823|AKAP8_HUMAN	O43823	AKAP8	VAPAPAAADAEVEQTDAESK	C82H132N22O34[M+2H]	VAPAPAAADAEVEQTDAESK(+H2)	985.471	55.18	713417
2_4	2_4_01.raw	sp|O43823|AKAP8_HUMAN	O43823	AKAP8	VAPAPAAADAEVEQTDAESK	C82H132N22O34[M+2H]	VAPAPAAADAEVEQTDAESK(+H2)	985.471	55.18	483001
2_5	2_5_01.raw	sp|O43823|AKAP8_HUMAN	O43823	AKAP8	VAPAPAAADAEVEQTDAESK	C82H132N22O34[M+2H]	VAPAPAAADAEVEQTDAESK(+H2)	985.471	55.18	306557
2_6	2_6_01.raw	sp|O43823|AKAP8_HUMAN	O43823	AKAP8	VAPAPAAADAEVEQTDAESK	C82H132N22O34[M+2H]	VAPAPAAADAEVEQTDAESK(+H2)	985.471	55.18	1005040
3_4	3_4_01.raw	sp|O43823|AKAP8_HUMAN	O43823	AKAP8	VAPAPAAADAEVEQTDAESK	C82H132N22O34[M+2H]	VAPAPAAADAEVEQTDAESK(+H2)	985.471	55.18	501395
3_5	3_5_01.raw	sp|O43823|AKAP8_HUMAN	O43823	AKAP8	VAPAPAAADAEVEQTDAESK	C82H132N22O34[M+2H]	VAPAPAAADAEVEQTDAESK(+H2)	985.471	55.18	128260
3_6	3_6_01.raw	sp|O43823|AKAP8_HUMAN	O43823	AKAP8	VAPAPAAADAEVEQTDAESK	C82H132N22O34[M+2H]	VAPAPAAADAEVEQTDAESK(+H2)	985.471	55.18	236080
4_4	4_4_01.raw	sp|O43823|AKAP8_HUMAN	O43823	AKAP8	VAPAPAAADAEVEQTDAESK	C82H132N22O34[M+2H]	VAPAPAAADAEVEQTDAESK(+H2)	985.471	55.18	153003
4_5	4_5_01.raw	sp|O43823|AKAP8_HUMAN	O43823	AKAP8	VAPAPAAADAEVEQTDAESK	C82H132N22O34[M+2H]	VAPAPAAADAEVEQTDAESK(+H2)	985.471	55.18	138228
4_6	4_6_01.raw	sp|O43823|AKAP8_HUMAN	O43823	AKAP8	VAPAPAAADAEVEQTDAESK	C82H132N22O34[M+2H]	VAPAPAAADAEVEQTDAESK(+H2)	985.471	55.18	176766
1_7	1_7_01.raw	sp|O43823|AKAP8_HUMAN	O43823	AKAP8	VAPAPAAADAEVEQTDAESK	C82H132N22O34[M+2H]	VAPAPAAADAEVEQTDAESK(+H2)	985.471	55.18	23483
1_8	1_8_01_171211223541.raw	sp|O43823|AKAP8_HUMAN	O43823	AKAP8	VAPAPAAADAEVEQTDAESK	C82H132N22O34[M+2H]	VAPAPAAADAEVEQTDAESK(+H2)	985.471	55.18	174257
1_9	1_9_01.raw	sp|O43823|AKAP8_HUMAN	O43823	AKAP8	VAPAPAAADAEVEQTDAESK	C82H132N22O34[M+2H]	VAPAPAAADAEVEQTDAESK(+H2)	985.471	55.18	225625
2_7	2_7_01.raw	sp|O43823|AKAP8_HUMAN	O43823	AKAP8	VAPAPAAADAEVEQTDAESK	C82H132N22O34[M+2H]	VAPAPAAADAEVEQTDAESK(+H2)	985.471	55.18	122942
2_8	2_8_01.raw	sp|O43823|AKAP8_HUMAN	O43823	AKAP8	VAPAPAAADAEVEQTDAESK	C82H132N22O34[M+2H]	VAPAPAAADAEVEQTDAESK(+H2)	985.471	55.18	91187
2_9	2_9_01_171217123101.raw	sp|O43823|AKAP8_HUMAN	O43823	AKAP8	VAPAPAAADAEVEQTDAESK	C82H132N22O34[M+2H]	VAPAPAAADAEVEQTDAESK(+H2)	985.471	55.18	157829
3_7	3_7_01.raw	sp|O43823|AKAP8_HUMAN	O43823	AKAP8	VAPAPAAADAEVEQTDAESK	C82H132N22O34[M+2H]	VAPAPAAADAEVEQTDAESK(+H2)	985.471	55.18	41606
3_8	3_8_01.raw	sp|O43823|AKAP8_HUMAN	O43823	AKAP8	VAPAPAAADAEVEQTDAESK	C82H132N22O34[M+2H]	VAPAPAAADAEVEQTDAESK(+H2)	985.471	55.18	100915
3_9	3_9_01.raw	sp|O43823|AKAP8_HUMAN	O43823	AKAP8	VAPAPAAADAEVEQTDAESK	C82H132N22O34[M+2H]	VAPAPAAADAEVEQTDAESK(+H2)	985.471	55.18	993346
4_7	4_7_01.raw	sp|O43823|AKAP8_HUMAN	O43823	AKAP8	VAPAPAAADAEVEQTDAESK	C82H132N22O34[M+2H]	VAPAPAAADAEVEQTDAESK(+H2)	985.471	55.18	304614
4_8	4_8_01.raw	sp|O43823|AKAP8_HUMAN	O43823	AKAP8	VAPAPAAADAEVEQTDAESK	C82H132N22O34[M+2H]	VAPAPAAADAEVEQTDAESK(+H2)	985.471	55.18	375070
4_9	4_9_01.raw	sp|O43823|AKAP8_HUMAN	O43823	AKAP8	VAPAPAAADAEVEQTDAESK	C82H132N22O34[M+2H]	VAPAPAAADAEVEQTDAESK(+H2)	985.471	55.18	111361
1_10	1_10_01.raw	sp|O43823|AKAP8_HUMAN	O43823	AKAP8	VAPAPAAADAEVEQTDAESK	C82H132N22O34[M+2H]	VAPAPAAADAEVEQTDAESK(+H2)	985.471	55.18	245011
1_11	1_11_01.raw	sp|O43823|AKAP8_HUMAN	O43823	AKAP8	VAPAPAAADAEVEQTDAESK	C82H132N22O34[M+2H]	VAPAPAAADAEVEQTDAESK(+H2)	985.471	55.18	905157
1_12	1_12_01.raw	sp|O43823|AKAP8_HUMAN	O43823	AKAP8	VAPAPAAADAEVEQTDAESK	C82H132N22O34[M+2H]	VAPAPAAADAEVEQTDAESK(+H2)	985.471	55.18	581065
2_10	2_10_01.raw	sp|O43823|AKAP8_HUMAN	O43823	AKAP8	VAPAPAAADAEVEQTDAESK	C82H132N22O34[M+2H]	VAPAPAAADAEVEQTDAESK(+H2)	985.471	55.18	182629
2_11	2_11_01_171223040132.raw	sp|O43823|AKAP8_HUMAN	O43823	AKAP8	VAPAPAAADAEVEQTDAESK	C82H132N22O34[M+2H]	VAPAPAAADAEVEQTDAESK(+H2)	985.471	55.18	179095
2_12	2_12_01.raw	sp|O43823|AKAP8_HUMAN	O43823	AKAP8	VAPAPAAADAEVEQTDAESK	C82H132N22O34[M+2H]	VAPAPAAADAEVEQTDAESK(+H2)	985.471	55.18	340631
3_10	3_10_01.raw	sp|O43823|AKAP8_HUMAN	O43823	AKAP8	VAPAPAAADAEVEQTDAESK	C82H132N22O34[M+2H]	VAPAPAAADAEVEQTDAESK(+H2)	985.471	55.18	47922
3_11	3_11_01.raw	sp|O43823|AKAP8_HUMAN	O43823	AKAP8	VAPAPAAADAEVEQTDAESK	C82H132N22O34[M+2H]	VAPAPAAADAEVEQTDAESK(+H2)	985.471	55.18	170520
Chromatograms	FinalList2_2.raw	sp|Q9ULX6|AKP8L_HUMAN	Q9ULX6	AKAP8L	IQFVC[+57]SLC[+57]K	C50H83N13O14S2[M+2H]	IQFVCSLCK(+H2)	577.788	72.78	1176113
GPS01	GPS01_1.raw	sp|Q9ULX6|AKP8L_HUMAN	Q9ULX6	AKAP8L	IQFVC[+57]SLC[+57]K	C50H83N13O14S2[M+2H]	IQFVCSLCK(+H2)	577.788	72.78	1746936
GPS02	GPS02_1.raw	sp|Q9ULX6|AKP8L_HUMAN	Q9ULX6	AKAP8L	IQFVC[+57]SLC[+57]K	C50H83N13O14S2[M+2H]	IQFVCSLCK(+H2)	577.788	72.78	1704573
GPS03	GPS03_1.raw	sp|Q9ULX6|AKP8L_HUMAN	Q9ULX6	AKAP8L	IQFVC[+57]SLC[+57]K	C50H83N13O14S2[M+2H]	IQFVCSLCK(+H2)	577.788	72.78	1039317
GPS04	GPS04_1.raw	sp|Q9ULX6|AKP8L_HUMAN	Q9ULX6	AKAP8L	IQFVC[+57]SLC[+57]K	C50H83N13O14S2[M+2H]	IQFVCSLCK(+H2)	577.788	72.78	1063082
GPS05	GPS_05_01.raw	sp|Q9ULX6|AKP8L_HUMAN	Q9ULX6	AKAP8L	IQFVC[+57]SLC[+57]K	C50H83N13O14S2[M+2H]	IQFVCSLCK(+H2)	577.788	72.78	490795
GPS06	GPS_06_01.raw	sp|Q9ULX6|AKP8L_HUMAN	Q9ULX6	AKAP8L	IQFVC[+57]SLC[+57]K	C50H83N13O14S2[M+2H]	IQFVCSLCK(+H2)	577.788	72.78	349523
1_1	1_1_01.raw	sp|Q9ULX6|AKP8L_HUMAN	Q9ULX6	AKAP8L	IQFVC[+57]SLC[+57]K	C50H83N13O14S2[M+2H]	IQFVCSLCK(+H2)	577.788	72.78	1536865
1_2	1_2_01.raw	sp|Q9ULX6|AKP8L_HUMAN	Q9ULX6	AKAP8L	IQFVC[+57]SLC[+57]K	C50H83N13O14S2[M+2H]	IQFVCSLCK(+H2)	577.788	72.78	2256361
1_3	1_3_01.raw	sp|Q9ULX6|AKP8L_HUMAN	Q9ULX6	AKAP8L	IQFVC[+57]SLC[+57]K	C50H83N13O14S2[M+2H]	IQFVCSLCK(+H2)	577.788	72.78	2407440
2_1	2_1_01.raw	sp|Q9ULX6|AKP8L_HUMAN	Q9ULX6	AKAP8L	IQFVC[+57]SLC[+57]K	C50H83N13O14S2[M+2H]	IQFVCSLCK(+H2)	577.788	72.78	1553064
2_2	2_2_01.raw	sp|Q9ULX6|AKP8L_HUMAN	Q9ULX6	AKAP8L	IQFVC[+57]SLC[+57]K	C50H83N13O14S2[M+2H]	IQFVCSLCK(+H2)	577.788	72.78	894148
2_3	2_3_01.raw	sp|Q9ULX6|AKP8L_HUMAN	Q9ULX6	AKAP8L	IQFVC[+57]SLC[+57]K	C50H83N13O14S2[M+2H]	IQFVCSLCK(+H2)	577.788	72.78	1315770
3_1	3_1_01.raw	sp|Q9ULX6|AKP8L_HUMAN	Q9ULX6	AKAP8L	IQFVC[+57]SLC[+57]K	C50H83N13O14S2[M+2H]	IQFVCSLCK(+H2)	577.788	72.78	873246
3_2	3_2_01_171223210221.raw	sp|Q9ULX6|AKP8L_HUMAN	Q9ULX6	AKAP8L	IQFVC[+57]SLC[+57]K	C50H83N13O14S2[M+2H]	IQFVCSLCK(+H2)	577.788	72.78	807937
3_3	3_3_01.raw	sp|Q9ULX6|AKP8L_HUMAN	Q9ULX6	AKAP8L	IQFVC[+57]SLC[+57]K	C50H83N13O14S2[M+2H]	IQFVCSLCK(+H2)	577.788	72.78	478164
4_1	4_1_01.raw	sp|Q9ULX6|AKP8L_HUMAN	Q9ULX6	AKAP8L	IQFVC[+57]SLC[+57]K	C50H83N13O14S2[M+2H]	IQFVCSLCK(+H2)	577.788	72.78	193733
4_2	4_2_01.raw	sp|Q9ULX6|AKP8L_HUMAN	Q9ULX6	AKAP8L	IQFVC[+57]SLC[+57]K	C50H83N13O14S2[M+2H]	IQFVCSLCK(+H2)	577.788	72.78	376325
4_3	4_3_01.raw	sp|Q9ULX6|AKP8L_HUMAN	Q9ULX6	AKAP8L	IQFVC[+57]SLC[+57]K	C50H83N13O14S2[M+2H]	IQFVCSLCK(+H2)	577.788	72.78	575220
1_4	1_4_01.raw	sp|Q9ULX6|AKP8L_HUMAN	Q9ULX6	AKAP8L	IQFVC[+57]SLC[+57]K	C50H83N13O14S2[M+2H]	IQFVCSLCK(+H2)	577.788	72.78	662963
1_5	1_5_01.raw	sp|Q9ULX6|AKP8L_HUMAN	Q9ULX6	AKAP8L	IQFVC[+57]SLC[+57]K	C50H83N13O14S2[M+2H]	IQFVCSLCK(+H2)	577.788	72.78	1090296
1_6	1_6_01.raw	sp|Q9ULX6|AKP8L_HUMAN	Q9ULX6	AKAP8L	IQFVC[+57]SLC[+57]K	C50H83N13O14S2[M+2H]	IQFVCSLCK(+H2)	577.788	72.78	2802430
2_4	2_4_01.raw	sp|Q9ULX6|AKP8L_HUMAN	Q9ULX6	AKAP8L	IQFVC[+57]SLC[+57]K	C50H83N13O14S2[M+2H]	IQFVCSLCK(+H2)	577.788	72.78	693849
2_5	2_5_01.raw	sp|Q9ULX6|AKP8L_HUMAN	Q9ULX6	AKAP8L	IQFVC[+57]SLC[+57]K	C50H83N13O14S2[M+2H]	IQFVCSLCK(+H2)	577.788	72.78	967127
2_6	2_6_01.raw	sp|Q9ULX6|AKP8L_HUMAN	Q9ULX6	AKAP8L	IQFVC[+57]SLC[+57]K	C50H83N13O14S2[M+2H]	IQFVCSLCK(+H2)	577.788	72.78	1302885
3_4	3_4_01.raw	sp|Q9ULX6|AKP8L_HUMAN	Q9ULX6	AKAP8L	IQFVC[+57]SLC[+57]K	C50H83N13O14S2[M+2H]	IQFVCSLCK(+H2)	577.788	72.78	587706
3_5	3_5_01.raw	sp|Q9ULX6|AKP8L_HUMAN	Q9ULX6	AKAP8L	IQFVC[+57]SLC[+57]K	C50H83N13O14S2[M+2H]	IQFVCSLCK(+H2)	577.788	72.78	779688
3_6	3_6_01.raw	sp|Q9ULX6|AKP8L_HUMAN	Q9ULX6	AKAP8L	IQFVC[+57]SLC[+57]K	C50H83N13O14S2[M+2H]	IQFVCSLCK(+H2)	577.788	72.78	835370
4_4	4_4_01.raw	sp|Q9ULX6|AKP8L_HUMAN	Q9ULX6	AKAP8L	IQFVC[+57]SLC[+57]K	C50H83N13O14S2[M+2H]	IQFVCSLCK(+H2)	577.788	72.78	328974
4_5	4_5_01.raw	sp|Q9ULX6|AKP8L_HUMAN	Q9ULX6	AKAP8L	IQFVC[+57]SLC[+57]K	C50H83N13O14S2[M+2H]	IQFVCSLCK(+H2)	577.788	72.78	286265
4_6	4_6_01.raw	sp|Q9ULX6|AKP8L_HUMAN	Q9ULX6	AKAP8L	IQFVC[+57]SLC[+57]K	C50H83N13O14S2[M+2H]	IQFVCSLCK(+H2)	577.788	72.78	451652
1_7	1_7_01.raw	sp|Q9ULX6|AKP8L_HUMAN	Q9ULX6	AKAP8L	IQFVC[+57]SLC[+57]K	C50H83N13O14S2[M+2H]	IQFVCSLCK(+H2)	577.788	72.78	376463
1_8	1_8_01_171211223541.raw	sp|Q9ULX6|AKP8L_HUMAN	Q9ULX6	AKAP8L	IQFVC[+57]SLC[+57]K	C50H83N13O14S2[M+2H]	IQFVCSLCK(+H2)	577.788	72.78	852489
1_9	1_9_01.raw	sp|Q9ULX6|AKP8L_HUMAN	Q9ULX6	AKAP8L	IQFVC[+57]SLC[+57]K	C50H83N13O14S2[M+2H]	IQFVCSLCK(+H2)	577.788	72.78	864046
2_7	2_7_01.raw	sp|Q9ULX6|AKP8L_HUMAN	Q9ULX6	AKAP8L	IQFVC[+57]SLC[+57]K	C50H83N13O14S2[M+2H]	IQFVCSLCK(+H2)	577.788	72.78	1209130
2_8	2_8_01.raw	sp|Q9ULX6|AKP8L_HUMAN	Q9ULX6	AKAP8L	IQFVC[+57]SLC[+57]K	C50H83N13O14S2[M+2H]	IQFVCSLCK(+H2)	577.788	72.78	1646277
2_9	2_9_01_171217123101.raw	sp|Q9ULX6|AKP8L_HUMAN	Q9ULX6	AKAP8L	IQFVC[+57]SLC[+57]K	C50H83N13O14S2[M+2H]	IQFVCSLCK(+H2)	577.788	72.78	589647
3_7	3_7_01.raw	sp|Q9ULX6|AKP8L_HUMAN	Q9ULX6	AKAP8L	IQFVC[+57]SLC[+57]K	C50H83N13O14S2[M+2H]	IQFVCSLCK(+H2)	577.788	72.78	176127
3_8	3_8_01.raw	sp|Q9ULX6|AKP8L_HUMAN	Q9ULX6	AKAP8L	IQFVC[+57]SLC[+57]K	C50H83N13O14S2[M+2H]	IQFVCSLCK(+H2)	577.788	72.78	519272
3_9	3_9_01.raw	sp|Q9ULX6|AKP8L_HUMAN	Q9ULX6	AKAP8L	IQFVC[+57]SLC[+57]K	C50H83N13O14S2[M+2H]	IQFVCSLCK(+H2)	577.788	72.78	1074721
4_7	4_7_01.raw	sp|Q9ULX6|AKP8L_HUMAN	Q9ULX6	AKAP8L	IQFVC[+57]SLC[+57]K	C50H83N13O14S2[M+2H]	IQFVCSLCK(+H2)	577.788	72.78	906742
4_8	4_8_01.raw	sp|Q9ULX6|AKP8L_HUMAN	Q9ULX6	AKAP8L	IQFVC[+57]SLC[+57]K	C50H83N13O14S2[M+2H]	IQFVCSLCK(+H2)	577.788	72.78	340656
4_9	4_9_01.raw	sp|Q9ULX6|AKP8L_HUMAN	Q9ULX6	AKAP8L	IQFVC[+57]SLC[+57]K	C50H83N13O14S2[M+2H]	IQFVCSLCK(+H2)	577.788	72.78	408412
1_10	1_10_01.raw	sp|Q9ULX6|AKP8L_HUMAN	Q9ULX6	AKAP8L	IQFVC[+57]SLC[+57]K	C50H83N13O14S2[M+2H]	IQFVCSLCK(+H2)	577.788	72.78	1327557
1_11	1_11_01.raw	sp|Q9ULX6|AKP8L_HUMAN	Q9ULX6	AKAP8L	IQFVC[+57]SLC[+57]K	C50H83N13O14S2[M+2H]	IQFVCSLCK(+H2)	577.788	72.78	417560
1_12	1_12_01.raw	sp|Q9ULX6|AKP8L_HUMAN	Q9ULX6	AKAP8L	IQFVC[+57]SLC[+57]K	C50H83N13O14S2[M+2H]	IQFVCSLCK(+H2)	577.788	72.78	1878741
2_10	2_10_01.raw	sp|Q9ULX6|AKP8L_HUMAN	Q9ULX6	AKAP8L	IQFVC[+57]SLC[+57]K	C50H83N13O14S2[M+2H]	IQFVCSLCK(+H2)	577.788	72.78	507723
2_11	2_11_01_171223040132.raw	sp|Q9ULX6|AKP8L_HUMAN	Q9ULX6	AKAP8L	IQFVC[+57]SLC[+57]K	C50H83N13O14S2[M+2H]	IQFVCSLCK(+H2)	577.788	72.78	932627
2_12	2_12_01.raw	sp|Q9ULX6|AKP8L_HUMAN	Q9ULX6	AKAP8L	IQFVC[+57]SLC[+57]K	C50H83N13O14S2[M+2H]	IQFVCSLCK(+H2)	577.788	72.78	1083795
3_10	3_10_01.raw	sp|Q9ULX6|AKP8L_HUMAN	Q9ULX6	AKAP8L	IQFVC[+57]SLC[+57]K	C50H83N13O14S2[M+2H]	IQFVCSLCK(+H2)	577.788	72.78	268080
3_11	3_11_01.raw	sp|Q9ULX6|AKP8L_HUMAN	Q9ULX6	AKAP8L	IQFVC[+57]SLC[+57]K	C50H83N13O14S2[M+2H]	IQFVCSLCK(+H2)	577.788	72.78	312329
Chromatograms	FinalList2_1.raw	sp|P27695|APEX1_HUMAN	P27695	APEX1	EGYSGVGLLSR	C49H80N14O17[M+2H]	EGYSGVGLLSR(+H2)	569.299	71.59	821969
GPS01	GPS01_1.raw	sp|P27695|APEX1_HUMAN	P27695	APEX1	EGYSGVGLLSR	C49H80N14O17[M+2H]	EGYSGVGLLSR(+H2)	569.299	71.59	731572
GPS02	GPS02_1.raw	sp|P27695|APEX1_HUMAN	P27695	APEX1	EGYSGVGLLSR	C49H80N14O17[M+2H]	EGYSGVGLLSR(+H2)	569.299	71.59	721833
GPS03	GPS03_1.raw	sp|P27695|APEX1_HUMAN	P27695	APEX1	EGYSGVGLLSR	C49H80N14O17[M+2H]	EGYSGVGLLSR(+H2)	569.299	71.59	774873
GPS04	GPS04_1.raw	sp|P27695|APEX1_HUMAN	P27695	APEX1	EGYSGVGLLSR	C49H80N14O17[M+2H]	EGYSGVGLLSR(+H2)	569.299	71.59	657673
GPS05	GPS_05_01.raw	sp|P27695|APEX1_HUMAN	P27695	APEX1	EGYSGVGLLSR	C49H80N14O17[M+2H]	EGYSGVGLLSR(+H2)	569.299	71.59	295417
GPS06	GPS_06_01.raw	sp|P27695|APEX1_HUMAN	P27695	APEX1	EGYSGVGLLSR	C49H80N14O17[M+2H]	EGYSGVGLLSR(+H2)	569.299	71.59	334365
1_1	1_1_01.raw	sp|P27695|APEX1_HUMAN	P27695	APEX1	EGYSGVGLLSR	C49H80N14O17[M+2H]	EGYSGVGLLSR(+H2)	569.299	71.59	2027825
1_2	1_2_01.raw	sp|P27695|APEX1_HUMAN	P27695	APEX1	EGYSGVGLLSR	C49H80N14O17[M+2H]	EGYSGVGLLSR(+H2)	569.299	71.59	538442
1_3	1_3_01.raw	sp|P27695|APEX1_HUMAN	P27695	APEX1	EGYSGVGLLSR	C49H80N14O17[M+2H]	EGYSGVGLLSR(+H2)	569.299	71.59	1421388
2_1	2_1_01.raw	sp|P27695|APEX1_HUMAN	P27695	APEX1	EGYSGVGLLSR	C49H80N14O17[M+2H]	EGYSGVGLLSR(+H2)	569.299	71.59	1029550
2_2	2_2_01.raw	sp|P27695|APEX1_HUMAN	P27695	APEX1	EGYSGVGLLSR	C49H80N14O17[M+2H]	EGYSGVGLLSR(+H2)	569.299	71.59	854214
2_3	2_3_01.raw	sp|P27695|APEX1_HUMAN	P27695	APEX1	EGYSGVGLLSR	C49H80N14O17[M+2H]	EGYSGVGLLSR(+H2)	569.299	71.59	783583
3_1	3_1_01.raw	sp|P27695|APEX1_HUMAN	P27695	APEX1	EGYSGVGLLSR	C49H80N14O17[M+2H]	EGYSGVGLLSR(+H2)	569.299	71.59	356802
3_2	3_2_01_171223210221.raw	sp|P27695|APEX1_HUMAN	P27695	APEX1	EGYSGVGLLSR	C49H80N14O17[M+2H]	EGYSGVGLLSR(+H2)	569.299	71.59	568241
3_3	3_3_01.raw	sp|P27695|APEX1_HUMAN	P27695	APEX1	EGYSGVGLLSR	C49H80N14O17[M+2H]	EGYSGVGLLSR(+H2)	569.299	71.59	370664
4_1	4_1_01.raw	sp|P27695|APEX1_HUMAN	P27695	APEX1	EGYSGVGLLSR	C49H80N14O17[M+2H]	EGYSGVGLLSR(+H2)	569.299	71.59	47021
4_2	4_2_01.raw	sp|P27695|APEX1_HUMAN	P27695	APEX1	EGYSGVGLLSR	C49H80N14O17[M+2H]	EGYSGVGLLSR(+H2)	569.299	71.59	207288
4_3	4_3_01.raw	sp|P27695|APEX1_HUMAN	P27695	APEX1	EGYSGVGLLSR	C49H80N14O17[M+2H]	EGYSGVGLLSR(+H2)	569.299	71.59	279065
1_4	1_4_01.raw	sp|P27695|APEX1_HUMAN	P27695	APEX1	EGYSGVGLLSR	C49H80N14O17[M+2H]	EGYSGVGLLSR(+H2)	569.299	71.59	510242
1_5	1_5_01.raw	sp|P27695|APEX1_HUMAN	P27695	APEX1	EGYSGVGLLSR	C49H80N14O17[M+2H]	EGYSGVGLLSR(+H2)	569.299	71.59	1799344
1_6	1_6_01.raw	sp|P27695|APEX1_HUMAN	P27695	APEX1	EGYSGVGLLSR	C49H80N14O17[M+2H]	EGYSGVGLLSR(+H2)	569.299	71.59	549455
2_4	2_4_01.raw	sp|P27695|APEX1_HUMAN	P27695	APEX1	EGYSGVGLLSR	C49H80N14O17[M+2H]	EGYSGVGLLSR(+H2)	569.299	71.59	852345
2_5	2_5_01.raw	sp|P27695|APEX1_HUMAN	P27695	APEX1	EGYSGVGLLSR	C49H80N14O17[M+2H]	EGYSGVGLLSR(+H2)	569.299	71.59	1188089
2_6	2_6_01.raw	sp|P27695|APEX1_HUMAN	P27695	APEX1	EGYSGVGLLSR	C49H80N14O17[M+2H]	EGYSGVGLLSR(+H2)	569.299	71.59	2210962
3_4	3_4_01.raw	sp|P27695|APEX1_HUMAN	P27695	APEX1	EGYSGVGLLSR	C49H80N14O17[M+2H]	EGYSGVGLLSR(+H2)	569.299	71.59	553727
3_5	3_5_01.raw	sp|P27695|APEX1_HUMAN	P27695	APEX1	EGYSGVGLLSR	C49H80N14O17[M+2H]	EGYSGVGLLSR(+H2)	569.299	71.59	368511
3_6	3_6_01.raw	sp|P27695|APEX1_HUMAN	P27695	APEX1	EGYSGVGLLSR	C49H80N14O17[M+2H]	EGYSGVGLLSR(+H2)	569.299	71.59	225545
4_4	4_4_01.raw	sp|P27695|APEX1_HUMAN	P27695	APEX1	EGYSGVGLLSR	C49H80N14O17[M+2H]	EGYSGVGLLSR(+H2)	569.299	71.59	410149
4_5	4_5_01.raw	sp|P27695|APEX1_HUMAN	P27695	APEX1	EGYSGVGLLSR	C49H80N14O17[M+2H]	EGYSGVGLLSR(+H2)	569.299	71.59	260473
4_6	4_6_01.raw	sp|P27695|APEX1_HUMAN	P27695	APEX1	EGYSGVGLLSR	C49H80N14O17[M+2H]	EGYSGVGLLSR(+H2)	569.299	71.59	342732
1_7	1_7_01.raw	sp|P27695|APEX1_HUMAN	P27695	APEX1	EGYSGVGLLSR	C49H80N14O17[M+2H]	EGYSGVGLLSR(+H2)	569.299	71.59	331327
1_8	1_8_01_171211223541.raw	sp|P27695|APEX1_HUMAN	P27695	APEX1	EGYSGVGLLSR	C49H80N14O17[M+2H]	EGYSGVGLLSR(+H2)	569.299	71.59	328835
1_9	1_9_01.raw	sp|P27695|APEX1_HUMAN	P27695	APEX1	EGYSGVGLLSR	C49H80N14O17[M+2H]	EGYSGVGLLSR(+H2)	569.299	71.59	392114
2_7	2_7_01.raw	sp|P27695|APEX1_HUMAN	P27695	APEX1	EGYSGVGLLSR	C49H80N14O17[M+2H]	EGYSGVGLLSR(+H2)	569.299	71.59	1049991
2_8	2_8_01.raw	sp|P27695|APEX1_HUMAN	P27695	APEX1	EGYSGVGLLSR	C49H80N14O17[M+2H]	EGYSGVGLLSR(+H2)	569.299	71.59	858298
2_9	2_9_01_171217123101.raw	sp|P27695|APEX1_HUMAN	P27695	APEX1	EGYSGVGLLSR	C49H80N14O17[M+2H]	EGYSGVGLLSR(+H2)	569.299	71.59	691867
3_7	3_7_01.raw	sp|P27695|APEX1_HUMAN	P27695	APEX1	EGYSGVGLLSR	C49H80N14O17[M+2H]	EGYSGVGLLSR(+H2)	569.299	71.59	448025
3_8	3_8_01.raw	sp|P27695|APEX1_HUMAN	P27695	APEX1	EGYSGVGLLSR	C49H80N14O17[M+2H]	EGYSGVGLLSR(+H2)	569.299	71.59	325751
3_9	3_9_01.raw	sp|P27695|APEX1_HUMAN	P27695	APEX1	EGYSGVGLLSR	C49H80N14O17[M+2H]	EGYSGVGLLSR(+H2)	569.299	71.59	518108
4_7	4_7_01.raw	sp|P27695|APEX1_HUMAN	P27695	APEX1	EGYSGVGLLSR	C49H80N14O17[M+2H]	EGYSGVGLLSR(+H2)	569.299	71.59	495322
4_8	4_8_01.raw	sp|P27695|APEX1_HUMAN	P27695	APEX1	EGYSGVGLLSR	C49H80N14O17[M+2H]	EGYSGVGLLSR(+H2)	569.299	71.59	589383
4_9	4_9_01.raw	sp|P27695|APEX1_HUMAN	P27695	APEX1	EGYSGVGLLSR	C49H80N14O17[M+2H]	EGYSGVGLLSR(+H2)	569.299	71.59	279347
1_10	1_10_01.raw	sp|P27695|APEX1_HUMAN	P27695	APEX1	EGYSGVGLLSR	C49H80N14O17[M+2H]	EGYSGVGLLSR(+H2)	569.299	71.59	740328
1_11	1_11_01.raw	sp|P27695|APEX1_HUMAN	P27695	APEX1	EGYSGVGLLSR	C49H80N14O17[M+2H]	EGYSGVGLLSR(+H2)	569.299	71.59	1266895
1_12	1_12_01.raw	sp|P27695|APEX1_HUMAN	P27695	APEX1	EGYSGVGLLSR	C49H80N14O17[M+2H]	EGYSGVGLLSR(+H2)	569.299	71.59	1032043
2_10	2_10_01.raw	sp|P27695|APEX1_HUMAN	P27695	APEX1	EGYSGVGLLSR	C49H80N14O17[M+2H]	EGYSGVGLLSR(+H2)	569.299	71.59	699569
2_11	2_11_01_171223040132.raw	sp|P27695|APEX1_HUMAN	P27695	APEX1	EGYSGVGLLSR	C49H80N14O17[M+2H]	EGYSGVGLLSR(+H2)	569.299	71.59	452346
2_12	2_12_01.raw	sp|P27695|APEX1_HUMAN	P27695	APEX1	EGYSGVGLLSR	C49H80N14O17[M+2H]	EGYSGVGLLSR(+H2)	569.299	71.59	673887
3_10	3_10_01.raw	sp|P27695|APEX1_HUMAN	P27695	APEX1	EGYSGVGLLSR	C49H80N14O17[M+2H]	EGYSGVGLLSR(+H2)	569.299	71.59	282422
3_11	3_11_01.raw	sp|P27695|APEX1_HUMAN	P27695	APEX1	EGYSGVGLLSR	C49H80N14O17[M+2H]	EGYSGVGLLSR(+H2)	569.299	71.59	161630
Chromatograms	FinalList2_2.raw	sp|P27695|APEX1_HUMAN	P27695	APEX1	QGFGELLQAVPLADSFR	C84H130N22O25[M+2H]	QGFGELLQAVPLADSFR(+H2)	924.486	124.96	1175164
GPS01	GPS01_2.raw	sp|P27695|APEX1_HUMAN	P27695	APEX1	QGFGELLQAVPLADSFR	C84H130N22O25[M+2H]	QGFGELLQAVPLADSFR(+H2)	924.486	124.96	1499211
GPS02	GPS02_2.raw	sp|P27695|APEX1_HUMAN	P27695	APEX1	QGFGELLQAVPLADSFR	C84H130N22O25[M+2H]	QGFGELLQAVPLADSFR(+H2)	924.486	124.96	927469
GPS03	GPS03_2.raw	sp|P27695|APEX1_HUMAN	P27695	APEX1	QGFGELLQAVPLADSFR	C84H130N22O25[M+2H]	QGFGELLQAVPLADSFR(+H2)	924.486	124.96	804253
GPS04	GPS04_2.raw	sp|P27695|APEX1_HUMAN	P27695	APEX1	QGFGELLQAVPLADSFR	C84H130N22O25[M+2H]	QGFGELLQAVPLADSFR(+H2)	924.486	124.96	1191214
GPS05	GPS_05_02.raw	sp|P27695|APEX1_HUMAN	P27695	APEX1	QGFGELLQAVPLADSFR	C84H130N22O25[M+2H]	QGFGELLQAVPLADSFR(+H2)	924.486	124.96	167790
GPS06	GPS_06_02.raw	sp|P27695|APEX1_HUMAN	P27695	APEX1	QGFGELLQAVPLADSFR	C84H130N22O25[M+2H]	QGFGELLQAVPLADSFR(+H2)	924.486	124.96	191314
1_1	1_1_02.raw	sp|P27695|APEX1_HUMAN	P27695	APEX1	QGFGELLQAVPLADSFR	C84H130N22O25[M+2H]	QGFGELLQAVPLADSFR(+H2)	924.486	124.96	2955951
1_2	1_2_02.raw	sp|P27695|APEX1_HUMAN	P27695	APEX1	QGFGELLQAVPLADSFR	C84H130N22O25[M+2H]	QGFGELLQAVPLADSFR(+H2)	924.486	124.96	632467
1_3	1_3_02.raw	sp|P27695|APEX1_HUMAN	P27695	APEX1	QGFGELLQAVPLADSFR	C84H130N22O25[M+2H]	QGFGELLQAVPLADSFR(+H2)	924.486	124.96	1825624
2_1	2_1_02.raw	sp|P27695|APEX1_HUMAN	P27695	APEX1	QGFGELLQAVPLADSFR	C84H130N22O25[M+2H]	QGFGELLQAVPLADSFR(+H2)	924.486	124.96	1037276
2_2	2_2_02.raw	sp|P27695|APEX1_HUMAN	P27695	APEX1	QGFGELLQAVPLADSFR	C84H130N22O25[M+2H]	QGFGELLQAVPLADSFR(+H2)	924.486	124.96	1278520
2_3	2_3_02.raw	sp|P27695|APEX1_HUMAN	P27695	APEX1	QGFGELLQAVPLADSFR	C84H130N22O25[M+2H]	QGFGELLQAVPLADSFR(+H2)	924.486	124.96	1476303
3_1	3_1_02.raw	sp|P27695|APEX1_HUMAN	P27695	APEX1	QGFGELLQAVPLADSFR	C84H130N22O25[M+2H]	QGFGELLQAVPLADSFR(+H2)	924.486	124.96	345371
3_2	3_2_02.raw	sp|P27695|APEX1_HUMAN	P27695	APEX1	QGFGELLQAVPLADSFR	C84H130N22O25[M+2H]	QGFGELLQAVPLADSFR(+H2)	924.486	124.96	537038
3_3	3_3_02.raw	sp|P27695|APEX1_HUMAN	P27695	APEX1	QGFGELLQAVPLADSFR	C84H130N22O25[M+2H]	QGFGELLQAVPLADSFR(+H2)	924.486	124.96	481545
4_1	4_1_02.raw	sp|P27695|APEX1_HUMAN	P27695	APEX1	QGFGELLQAVPLADSFR	C84H130N22O25[M+2H]	QGFGELLQAVPLADSFR(+H2)	924.486	124.96	222782
4_2	4_2_02.raw	sp|P27695|APEX1_HUMAN	P27695	APEX1	QGFGELLQAVPLADSFR	C84H130N22O25[M+2H]	QGFGELLQAVPLADSFR(+H2)	924.486	124.96	212115
4_3	4_3_02.raw	sp|P27695|APEX1_HUMAN	P27695	APEX1	QGFGELLQAVPLADSFR	C84H130N22O25[M+2H]	QGFGELLQAVPLADSFR(+H2)	924.486	124.96	207449
1_4	1_4_02.raw	sp|P27695|APEX1_HUMAN	P27695	APEX1	QGFGELLQAVPLADSFR	C84H130N22O25[M+2H]	QGFGELLQAVPLADSFR(+H2)	924.486	124.96	343189
1_5	1_5_02.raw	sp|P27695|APEX1_HUMAN	P27695	APEX1	QGFGELLQAVPLADSFR	C84H130N22O25[M+2H]	QGFGELLQAVPLADSFR(+H2)	924.486	124.96	2048338
1_6	1_6_02.raw	sp|P27695|APEX1_HUMAN	P27695	APEX1	QGFGELLQAVPLADSFR	C84H130N22O25[M+2H]	QGFGELLQAVPLADSFR(+H2)	924.486	124.96	716249
2_4	2_4_02.raw	sp|P27695|APEX1_HUMAN	P27695	APEX1	QGFGELLQAVPLADSFR	C84H130N22O25[M+2H]	QGFGELLQAVPLADSFR(+H2)	924.486	124.96	1287871
2_5	2_5_02.raw	sp|P27695|APEX1_HUMAN	P27695	APEX1	QGFGELLQAVPLADSFR	C84H130N22O25[M+2H]	QGFGELLQAVPLADSFR(+H2)	924.486	124.96	1514172
2_6	2_6_02.raw	sp|P27695|APEX1_HUMAN	P27695	APEX1	QGFGELLQAVPLADSFR	C84H130N22O25[M+2H]	QGFGELLQAVPLADSFR(+H2)	924.486	124.96	3174547
3_4	3_4_02.raw	sp|P27695|APEX1_HUMAN	P27695	APEX1	QGFGELLQAVPLADSFR	C84H130N22O25[M+2H]	QGFGELLQAVPLADSFR(+H2)	924.486	124.96	613747
3_5	3_5_02.raw	sp|P27695|APEX1_HUMAN	P27695	APEX1	QGFGELLQAVPLADSFR	C84H130N22O25[M+2H]	QGFGELLQAVPLADSFR(+H2)	924.486	124.96	414843
3_6	3_6_02.raw	sp|P27695|APEX1_HUMAN	P27695	APEX1	QGFGELLQAVPLADSFR	C84H130N22O25[M+2H]	QGFGELLQAVPLADSFR(+H2)	924.486	124.96	370564
4_4	4_4_02.raw	sp|P27695|APEX1_HUMAN	P27695	APEX1	QGFGELLQAVPLADSFR	C84H130N22O25[M+2H]	QGFGELLQAVPLADSFR(+H2)	924.486	124.96	204055
4_5	4_5_02.raw	sp|P27695|APEX1_HUMAN	P27695	APEX1	QGFGELLQAVPLADSFR	C84H130N22O25[M+2H]	QGFGELLQAVPLADSFR(+H2)	924.486	124.96	124651
4_6	4_6_02.raw	sp|P27695|APEX1_HUMAN	P27695	APEX1	QGFGELLQAVPLADSFR	C84H130N22O25[M+2H]	QGFGELLQAVPLADSFR(+H2)	924.486	124.96	76057
1_7	1_7_02.raw	sp|P27695|APEX1_HUMAN	P27695	APEX1	QGFGELLQAVPLADSFR	C84H130N22O25[M+2H]	QGFGELLQAVPLADSFR(+H2)	924.486	124.96	355091
1_8	1_8_02.raw	sp|P27695|APEX1_HUMAN	P27695	APEX1	QGFGELLQAVPLADSFR	C84H130N22O25[M+2H]	QGFGELLQAVPLADSFR(+H2)	924.486	124.96	145661
1_9	1_9_02.raw	sp|P27695|APEX1_HUMAN	P27695	APEX1	QGFGELLQAVPLADSFR	C84H130N22O25[M+2H]	QGFGELLQAVPLADSFR(+H2)	924.486	124.96	379347
2_7	2_7_02.raw	sp|P27695|APEX1_HUMAN	P27695	APEX1	QGFGELLQAVPLADSFR	C84H130N22O25[M+2H]	QGFGELLQAVPLADSFR(+H2)	924.486	124.96	763486
2_8	2_8_02.raw	sp|P27695|APEX1_HUMAN	P27695	APEX1	QGFGELLQAVPLADSFR	C84H130N22O25[M+2H]	QGFGELLQAVPLADSFR(+H2)	924.486	124.96	1222678
2_9	2_9_02_171217160937.raw	sp|P27695|APEX1_HUMAN	P27695	APEX1	QGFGELLQAVPLADSFR	C84H130N22O25[M+2H]	QGFGELLQAVPLADSFR(+H2)	924.486	124.96	1543603
3_7	3_7_02.raw	sp|P27695|APEX1_HUMAN	P27695	APEX1	QGFGELLQAVPLADSFR	C84H130N22O25[M+2H]	QGFGELLQAVPLADSFR(+H2)	924.486	124.96	504383
3_8	3_8_02.raw	sp|P27695|APEX1_HUMAN	P27695	APEX1	QGFGELLQAVPLADSFR	C84H130N22O25[M+2H]	QGFGELLQAVPLADSFR(+H2)	924.486	124.96	205783
3_9	3_9_02.raw	sp|P27695|APEX1_HUMAN	P27695	APEX1	QGFGELLQAVPLADSFR	C84H130N22O25[M+2H]	QGFGELLQAVPLADSFR(+H2)	924.486	124.96	699344
4_7	4_7_02.raw	sp|P27695|APEX1_HUMAN	P27695	APEX1	QGFGELLQAVPLADSFR	C84H130N22O25[M+2H]	QGFGELLQAVPLADSFR(+H2)	924.486	124.96	579445
4_8	4_8_02.raw	sp|P27695|APEX1_HUMAN	P27695	APEX1	QGFGELLQAVPLADSFR	C84H130N22O25[M+2H]	QGFGELLQAVPLADSFR(+H2)	924.486	124.96	520331
4_9	4_9_02.raw	sp|P27695|APEX1_HUMAN	P27695	APEX1	QGFGELLQAVPLADSFR	C84H130N22O25[M+2H]	QGFGELLQAVPLADSFR(+H2)	924.486	124.96	254320
1_10	1_10_02.raw	sp|P27695|APEX1_HUMAN	P27695	APEX1	QGFGELLQAVPLADSFR	C84H130N22O25[M+2H]	QGFGELLQAVPLADSFR(+H2)	924.486	124.96	563636
1_11	1_11_02.raw	sp|P27695|APEX1_HUMAN	P27695	APEX1	QGFGELLQAVPLADSFR	C84H130N22O25[M+2H]	QGFGELLQAVPLADSFR(+H2)	924.486	124.96	1141442
1_12	1_12_02.raw	sp|P27695|APEX1_HUMAN	P27695	APEX1	QGFGELLQAVPLADSFR	C84H130N22O25[M+2H]	QGFGELLQAVPLADSFR(+H2)	924.486	124.96	511081
2_10	2_10_02.raw	sp|P27695|APEX1_HUMAN	P27695	APEX1	QGFGELLQAVPLADSFR	C84H130N22O25[M+2H]	QGFGELLQAVPLADSFR(+H2)	924.486	124.96	967259
2_11	2_11_02.raw	sp|P27695|APEX1_HUMAN	P27695	APEX1	QGFGELLQAVPLADSFR	C84H130N22O25[M+2H]	QGFGELLQAVPLADSFR(+H2)	924.486	124.96	277033
2_12	2_12_02.raw	sp|P27695|APEX1_HUMAN	P27695	APEX1	QGFGELLQAVPLADSFR	C84H130N22O25[M+2H]	QGFGELLQAVPLADSFR(+H2)	924.486	124.96	287431
3_10	3_10_02.raw	sp|P27695|APEX1_HUMAN	P27695	APEX1	QGFGELLQAVPLADSFR	C84H130N22O25[M+2H]	QGFGELLQAVPLADSFR(+H2)	924.486	124.96	160422
3_11	3_11_02.raw	sp|P27695|APEX1_HUMAN	P27695	APEX1	QGFGELLQAVPLADSFR	C84H130N22O25[M+2H]	QGFGELLQAVPLADSFR(+H2)	924.486	124.96	85696
Chromatograms	FinalList2_2.raw	sp|P05067|A4_HUMAN	P05067	APP	THPHFVIPYR	C61H87N17O13[M+3H]	THPHFVIPYR(+H3)	422.896	61.44	2006890
GPS01	GPS01_1.raw	sp|P05067|A4_HUMAN	P05067	APP	THPHFVIPYR	C61H87N17O13[M+3H]	THPHFVIPYR(+H3)	422.896	61.44	2692710
GPS02	GPS02_1.raw	sp|P05067|A4_HUMAN	P05067	APP	THPHFVIPYR	C61H87N17O13[M+3H]	THPHFVIPYR(+H3)	422.896	61.44	3042909
GPS03	GPS03_1.raw	sp|P05067|A4_HUMAN	P05067	APP	THPHFVIPYR	C61H87N17O13[M+3H]	THPHFVIPYR(+H3)	422.896	61.44	3247950
GPS04	GPS04_1.raw	sp|P05067|A4_HUMAN	P05067	APP	THPHFVIPYR	C61H87N17O13[M+3H]	THPHFVIPYR(+H3)	422.896	61.44	2726576
GPS05	GPS_05_01.raw	sp|P05067|A4_HUMAN	P05067	APP	THPHFVIPYR	C61H87N17O13[M+3H]	THPHFVIPYR(+H3)	422.896	61.44	2006655
GPS06	GPS_06_01.raw	sp|P05067|A4_HUMAN	P05067	APP	THPHFVIPYR	C61H87N17O13[M+3H]	THPHFVIPYR(+H3)	422.896	61.44	1876651
1_1	1_1_01.raw	sp|P05067|A4_HUMAN	P05067	APP	THPHFVIPYR	C61H87N17O13[M+3H]	THPHFVIPYR(+H3)	422.896	61.44	5005367
1_2	1_2_01.raw	sp|P05067|A4_HUMAN	P05067	APP	THPHFVIPYR	C61H87N17O13[M+3H]	THPHFVIPYR(+H3)	422.896	61.44	7767410
1_3	1_3_01.raw	sp|P05067|A4_HUMAN	P05067	APP	THPHFVIPYR	C61H87N17O13[M+3H]	THPHFVIPYR(+H3)	422.896	61.44	4130243
2_1	2_1_01.raw	sp|P05067|A4_HUMAN	P05067	APP	THPHFVIPYR	C61H87N17O13[M+3H]	THPHFVIPYR(+H3)	422.896	61.44	10180856
2_2	2_2_01.raw	sp|P05067|A4_HUMAN	P05067	APP	THPHFVIPYR	C61H87N17O13[M+3H]	THPHFVIPYR(+H3)	422.896	61.44	6002062
2_3	2_3_01.raw	sp|P05067|A4_HUMAN	P05067	APP	THPHFVIPYR	C61H87N17O13[M+3H]	THPHFVIPYR(+H3)	422.896	61.44	4768668
3_1	3_1_01.raw	sp|P05067|A4_HUMAN	P05067	APP	THPHFVIPYR	C61H87N17O13[M+3H]	THPHFVIPYR(+H3)	422.896	61.44	245373
3_2	3_2_01_171223210221.raw	sp|P05067|A4_HUMAN	P05067	APP	THPHFVIPYR	C61H87N17O13[M+3H]	THPHFVIPYR(+H3)	422.896	61.44	4167370
3_3	3_3_01.raw	sp|P05067|A4_HUMAN	P05067	APP	THPHFVIPYR	C61H87N17O13[M+3H]	THPHFVIPYR(+H3)	422.896	61.44	1286113
4_1	4_1_01.raw	sp|P05067|A4_HUMAN	P05067	APP	THPHFVIPYR	C61H87N17O13[M+3H]	THPHFVIPYR(+H3)	422.896	61.44	194814
4_2	4_2_01.raw	sp|P05067|A4_HUMAN	P05067	APP	THPHFVIPYR	C61H87N17O13[M+3H]	THPHFVIPYR(+H3)	422.896	61.44	2328865
4_3	4_3_01.raw	sp|P05067|A4_HUMAN	P05067	APP	THPHFVIPYR	C61H87N17O13[M+3H]	THPHFVIPYR(+H3)	422.896	61.44	2168251
1_4	1_4_01.raw	sp|P05067|A4_HUMAN	P05067	APP	THPHFVIPYR	C61H87N17O13[M+3H]	THPHFVIPYR(+H3)	422.896	61.44	1369395
1_5	1_5_01.raw	sp|P05067|A4_HUMAN	P05067	APP	THPHFVIPYR	C61H87N17O13[M+3H]	THPHFVIPYR(+H3)	422.896	61.44	3170652
1_6	1_6_01.raw	sp|P05067|A4_HUMAN	P05067	APP	THPHFVIPYR	C61H87N17O13[M+3H]	THPHFVIPYR(+H3)	422.896	61.44	4085172
2_4	2_4_01.raw	sp|P05067|A4_HUMAN	P05067	APP	THPHFVIPYR	C61H87N17O13[M+3H]	THPHFVIPYR(+H3)	422.896	61.44	2618192
2_5	2_5_01.raw	sp|P05067|A4_HUMAN	P05067	APP	THPHFVIPYR	C61H87N17O13[M+3H]	THPHFVIPYR(+H3)	422.896	61.44	3371204
2_6	2_6_01.raw	sp|P05067|A4_HUMAN	P05067	APP	THPHFVIPYR	C61H87N17O13[M+3H]	THPHFVIPYR(+H3)	422.896	61.44	4559322
3_4	3_4_01.raw	sp|P05067|A4_HUMAN	P05067	APP	THPHFVIPYR	C61H87N17O13[M+3H]	THPHFVIPYR(+H3)	422.896	61.44	1198987
3_5	3_5_01.raw	sp|P05067|A4_HUMAN	P05067	APP	THPHFVIPYR	C61H87N17O13[M+3H]	THPHFVIPYR(+H3)	422.896	61.44	2797268
3_6	3_6_01.raw	sp|P05067|A4_HUMAN	P05067	APP	THPHFVIPYR	C61H87N17O13[M+3H]	THPHFVIPYR(+H3)	422.896	61.44	66421
4_4	4_4_01.raw	sp|P05067|A4_HUMAN	P05067	APP	THPHFVIPYR	C61H87N17O13[M+3H]	THPHFVIPYR(+H3)	422.896	61.44	933991
4_5	4_5_01.raw	sp|P05067|A4_HUMAN	P05067	APP	THPHFVIPYR	C61H87N17O13[M+3H]	THPHFVIPYR(+H3)	422.896	61.44	1115993
4_6	4_6_01.raw	sp|P05067|A4_HUMAN	P05067	APP	THPHFVIPYR	C61H87N17O13[M+3H]	THPHFVIPYR(+H3)	422.896	61.44	342272
1_7	1_7_01.raw	sp|P05067|A4_HUMAN	P05067	APP	THPHFVIPYR	C61H87N17O13[M+3H]	THPHFVIPYR(+H3)	422.896	61.44	2063633
1_8	1_8_01_171211223541.raw	sp|P05067|A4_HUMAN	P05067	APP	THPHFVIPYR	C61H87N17O13[M+3H]	THPHFVIPYR(+H3)	422.896	61.44	764604
1_9	1_9_01.raw	sp|P05067|A4_HUMAN	P05067	APP	THPHFVIPYR	C61H87N17O13[M+3H]	THPHFVIPYR(+H3)	422.896	61.44	4901828
2_7	2_7_01.raw	sp|P05067|A4_HUMAN	P05067	APP	THPHFVIPYR	C61H87N17O13[M+3H]	THPHFVIPYR(+H3)	422.896	61.44	2728881
2_8	2_8_01.raw	sp|P05067|A4_HUMAN	P05067	APP	THPHFVIPYR	C61H87N17O13[M+3H]	THPHFVIPYR(+H3)	422.896	61.44	3547044
2_9	2_9_01_171217123101.raw	sp|P05067|A4_HUMAN	P05067	APP	THPHFVIPYR	C61H87N17O13[M+3H]	THPHFVIPYR(+H3)	422.896	61.44	3298448
3_7	3_7_01.raw	sp|P05067|A4_HUMAN	P05067	APP	THPHFVIPYR	C61H87N17O13[M+3H]	THPHFVIPYR(+H3)	422.896	61.44	208547
3_8	3_8_01.raw	sp|P05067|A4_HUMAN	P05067	APP	THPHFVIPYR	C61H87N17O13[M+3H]	THPHFVIPYR(+H3)	422.896	61.44	2066018
3_9	3_9_01.raw	sp|P05067|A4_HUMAN	P05067	APP	THPHFVIPYR	C61H87N17O13[M+3H]	THPHFVIPYR(+H3)	422.896	61.44	2671609
4_7	4_7_01.raw	sp|P05067|A4_HUMAN	P05067	APP	THPHFVIPYR	C61H87N17O13[M+3H]	THPHFVIPYR(+H3)	422.896	61.44	3740545
4_8	4_8_01.raw	sp|P05067|A4_HUMAN	P05067	APP	THPHFVIPYR	C61H87N17O13[M+3H]	THPHFVIPYR(+H3)	422.896	61.44	1759385
4_9	4_9_01.raw	sp|P05067|A4_HUMAN	P05067	APP	THPHFVIPYR	C61H87N17O13[M+3H]	THPHFVIPYR(+H3)	422.896	61.44	1814342
1_10	1_10_01.raw	sp|P05067|A4_HUMAN	P05067	APP	THPHFVIPYR	C61H87N17O13[M+3H]	THPHFVIPYR(+H3)	422.896	61.44	6090040
1_11	1_11_01.raw	sp|P05067|A4_HUMAN	P05067	APP	THPHFVIPYR	C61H87N17O13[M+3H]	THPHFVIPYR(+H3)	422.896	61.44	4791231
1_12	1_12_01.raw	sp|P05067|A4_HUMAN	P05067	APP	THPHFVIPYR	C61H87N17O13[M+3H]	THPHFVIPYR(+H3)	422.896	61.44	5027015
2_10	2_10_01.raw	sp|P05067|A4_HUMAN	P05067	APP	THPHFVIPYR	C61H87N17O13[M+3H]	THPHFVIPYR(+H3)	422.896	61.44	1513220
2_11	2_11_01_171223040132.raw	sp|P05067|A4_HUMAN	P05067	APP	THPHFVIPYR	C61H87N17O13[M+3H]	THPHFVIPYR(+H3)	422.896	61.44	3008056
2_12	2_12_01.raw	sp|P05067|A4_HUMAN	P05067	APP	THPHFVIPYR	C61H87N17O13[M+3H]	THPHFVIPYR(+H3)	422.896	61.44	4467477
3_10	3_10_01.raw	sp|P05067|A4_HUMAN	P05067	APP	THPHFVIPYR	C61H87N17O13[M+3H]	THPHFVIPYR(+H3)	422.896	61.44	1090366
3_11	3_11_01.raw	sp|P05067|A4_HUMAN	P05067	APP	THPHFVIPYR	C61H87N17O13[M+3H]	THPHFVIPYR(+H3)	422.896	61.44	2433547
Chromatograms	FinalList2_2.raw	sp|P05067|A4_HUMAN	P05067	APP	VESLEQEAANER	C55H91N17O24[M+2H]	VESLEQEAANER(+H2)	687.828	53.03	1043067
GPS01	GPS01_1.raw	sp|P05067|A4_HUMAN	P05067	APP	VESLEQEAANER	C55H91N17O24[M+2H]	VESLEQEAANER(+H2)	687.828	53.03	1924840
GPS02	GPS02_1.raw	sp|P05067|A4_HUMAN	P05067	APP	VESLEQEAANER	C55H91N17O24[M+2H]	VESLEQEAANER(+H2)	687.828	53.03	1765013
GPS03	GPS03_1.raw	sp|P05067|A4_HUMAN	P05067	APP	VESLEQEAANER	C55H91N17O24[M+2H]	VESLEQEAANER(+H2)	687.828	53.03	1314025
GPS04	GPS04_1.raw	sp|P05067|A4_HUMAN	P05067	APP	VESLEQEAANER	C55H91N17O24[M+2H]	VESLEQEAANER(+H2)	687.828	53.03	1279891
GPS05	GPS_05_01.raw	sp|P05067|A4_HUMAN	P05067	APP	VESLEQEAANER	C55H91N17O24[M+2H]	VESLEQEAANER(+H2)	687.828	53.03	1242899
GPS06	GPS_06_01.raw	sp|P05067|A4_HUMAN	P05067	APP	VESLEQEAANER	C55H91N17O24[M+2H]	VESLEQEAANER(+H2)	687.828	53.03	1126221
1_1	1_1_01.raw	sp|P05067|A4_HUMAN	P05067	APP	VESLEQEAANER	C55H91N17O24[M+2H]	VESLEQEAANER(+H2)	687.828	53.03	2028556
1_2	1_2_01.raw	sp|P05067|A4_HUMAN	P05067	APP	VESLEQEAANER	C55H91N17O24[M+2H]	VESLEQEAANER(+H2)	687.828	53.03	3128997
1_3	1_3_01.raw	sp|P05067|A4_HUMAN	P05067	APP	VESLEQEAANER	C55H91N17O24[M+2H]	VESLEQEAANER(+H2)	687.828	53.03	2045463
2_1	2_1_01.raw	sp|P05067|A4_HUMAN	P05067	APP	VESLEQEAANER	C55H91N17O24[M+2H]	VESLEQEAANER(+H2)	687.828	53.03	1823064
2_2	2_2_01.raw	sp|P05067|A4_HUMAN	P05067	APP	VESLEQEAANER	C55H91N17O24[M+2H]	VESLEQEAANER(+H2)	687.828	53.03	1390947
2_3	2_3_01.raw	sp|P05067|A4_HUMAN	P05067	APP	VESLEQEAANER	C55H91N17O24[M+2H]	VESLEQEAANER(+H2)	687.828	53.03	1462578
3_1	3_1_01.raw	sp|P05067|A4_HUMAN	P05067	APP	VESLEQEAANER	C55H91N17O24[M+2H]	VESLEQEAANER(+H2)	687.828	53.03	842079
3_2	3_2_01_171223210221.raw	sp|P05067|A4_HUMAN	P05067	APP	VESLEQEAANER	C55H91N17O24[M+2H]	VESLEQEAANER(+H2)	687.828	53.03	1328183
3_3	3_3_01.raw	sp|P05067|A4_HUMAN	P05067	APP	VESLEQEAANER	C55H91N17O24[M+2H]	VESLEQEAANER(+H2)	687.828	53.03	604917
4_1	4_1_01.raw	sp|P05067|A4_HUMAN	P05067	APP	VESLEQEAANER	C55H91N17O24[M+2H]	VESLEQEAANER(+H2)	687.828	53.03	129132
4_2	4_2_01.raw	sp|P05067|A4_HUMAN	P05067	APP	VESLEQEAANER	C55H91N17O24[M+2H]	VESLEQEAANER(+H2)	687.828	53.03	1164152
4_3	4_3_01.raw	sp|P05067|A4_HUMAN	P05067	APP	VESLEQEAANER	C55H91N17O24[M+2H]	VESLEQEAANER(+H2)	687.828	53.03	1253640
1_4	1_4_01.raw	sp|P05067|A4_HUMAN	P05067	APP	VESLEQEAANER	C55H91N17O24[M+2H]	VESLEQEAANER(+H2)	687.828	53.03	1499268
1_5	1_5_01.raw	sp|P05067|A4_HUMAN	P05067	APP	VESLEQEAANER	C55H91N17O24[M+2H]	VESLEQEAANER(+H2)	687.828	53.03	1074061
1_6	1_6_01.raw	sp|P05067|A4_HUMAN	P05067	APP	VESLEQEAANER	C55H91N17O24[M+2H]	VESLEQEAANER(+H2)	687.828	53.03	1871591
2_4	2_4_01.raw	sp|P05067|A4_HUMAN	P05067	APP	VESLEQEAANER	C55H91N17O24[M+2H]	VESLEQEAANER(+H2)	687.828	53.03	846285
2_5	2_5_01.raw	sp|P05067|A4_HUMAN	P05067	APP	VESLEQEAANER	C55H91N17O24[M+2H]	VESLEQEAANER(+H2)	687.828	53.03	906112
2_6	2_6_01.raw	sp|P05067|A4_HUMAN	P05067	APP	VESLEQEAANER	C55H91N17O24[M+2H]	VESLEQEAANER(+H2)	687.828	53.03	1059954
3_4	3_4_01.raw	sp|P05067|A4_HUMAN	P05067	APP	VESLEQEAANER	C55H91N17O24[M+2H]	VESLEQEAANER(+H2)	687.828	53.03	370711
3_5	3_5_01.raw	sp|P05067|A4_HUMAN	P05067	APP	VESLEQEAANER	C55H91N17O24[M+2H]	VESLEQEAANER(+H2)	687.828	53.03	977013
3_6	3_6_01.raw	sp|P05067|A4_HUMAN	P05067	APP	VESLEQEAANER	C55H91N17O24[M+2H]	VESLEQEAANER(+H2)	687.828	53.03	1410711
4_4	4_4_01.raw	sp|P05067|A4_HUMAN	P05067	APP	VESLEQEAANER	C55H91N17O24[M+2H]	VESLEQEAANER(+H2)	687.828	53.03	712565
4_5	4_5_01.raw	sp|P05067|A4_HUMAN	P05067	APP	VESLEQEAANER	C55H91N17O24[M+2H]	VESLEQEAANER(+H2)	687.828	53.03	628427
4_6	4_6_01.raw	sp|P05067|A4_HUMAN	P05067	APP	VESLEQEAANER	C55H91N17O24[M+2H]	VESLEQEAANER(+H2)	687.828	53.03	527204
1_7	1_7_01.raw	sp|P05067|A4_HUMAN	P05067	APP	VESLEQEAANER	C55H91N17O24[M+2H]	VESLEQEAANER(+H2)	687.828	53.03	727968
1_8	1_8_01_171211223541.raw	sp|P05067|A4_HUMAN	P05067	APP	VESLEQEAANER	C55H91N17O24[M+2H]	VESLEQEAANER(+H2)	687.828	53.03	976882
1_9	1_9_01.raw	sp|P05067|A4_HUMAN	P05067	APP	VESLEQEAANER	C55H91N17O24[M+2H]	VESLEQEAANER(+H2)	687.828	53.03	1337315
2_7	2_7_01.raw	sp|P05067|A4_HUMAN	P05067	APP	VESLEQEAANER	C55H91N17O24[M+2H]	VESLEQEAANER(+H2)	687.828	53.03	1463715
2_8	2_8_01.raw	sp|P05067|A4_HUMAN	P05067	APP	VESLEQEAANER	C55H91N17O24[M+2H]	VESLEQEAANER(+H2)	687.828	53.03	1110910
2_9	2_9_01_171217123101.raw	sp|P05067|A4_HUMAN	P05067	APP	VESLEQEAANER	C55H91N17O24[M+2H]	VESLEQEAANER(+H2)	687.828	53.03	779345
3_7	3_7_01.raw	sp|P05067|A4_HUMAN	P05067	APP	VESLEQEAANER	C55H91N17O24[M+2H]	VESLEQEAANER(+H2)	687.828	53.03	884680
3_8	3_8_01.raw	sp|P05067|A4_HUMAN	P05067	APP	VESLEQEAANER	C55H91N17O24[M+2H]	VESLEQEAANER(+H2)	687.828	53.03	700060
3_9	3_9_01.raw	sp|P05067|A4_HUMAN	P05067	APP	VESLEQEAANER	C55H91N17O24[M+2H]	VESLEQEAANER(+H2)	687.828	53.03	1071278
4_7	4_7_01.raw	sp|P05067|A4_HUMAN	P05067	APP	VESLEQEAANER	C55H91N17O24[M+2H]	VESLEQEAANER(+H2)	687.828	53.03	1293577
4_8	4_8_01.raw	sp|P05067|A4_HUMAN	P05067	APP	VESLEQEAANER	C55H91N17O24[M+2H]	VESLEQEAANER(+H2)	687.828	53.03	754133
4_9	4_9_01.raw	sp|P05067|A4_HUMAN	P05067	APP	VESLEQEAANER	C55H91N17O24[M+2H]	VESLEQEAANER(+H2)	687.828	53.03	698629
1_10	1_10_01.raw	sp|P05067|A4_HUMAN	P05067	APP	VESLEQEAANER	C55H91N17O24[M+2H]	VESLEQEAANER(+H2)	687.828	53.03	1734951
1_11	1_11_01.raw	sp|P05067|A4_HUMAN	P05067	APP	VESLEQEAANER	C55H91N17O24[M+2H]	VESLEQEAANER(+H2)	687.828	53.03	1541334
1_12	1_12_01.raw	sp|P05067|A4_HUMAN	P05067	APP	VESLEQEAANER	C55H91N17O24[M+2H]	VESLEQEAANER(+H2)	687.828	53.03	3442261
2_10	2_10_01.raw	sp|P05067|A4_HUMAN	P05067	APP	VESLEQEAANER	C55H91N17O24[M+2H]	VESLEQEAANER(+H2)	687.828	53.03	1896908
2_11	2_11_01_171223040132.raw	sp|P05067|A4_HUMAN	P05067	APP	VESLEQEAANER	C55H91N17O24[M+2H]	VESLEQEAANER(+H2)	687.828	53.03	1792452
2_12	2_12_01.raw	sp|P05067|A4_HUMAN	P05067	APP	VESLEQEAANER	C55H91N17O24[M+2H]	VESLEQEAANER(+H2)	687.828	53.03	1000946
3_10	3_10_01.raw	sp|P05067|A4_HUMAN	P05067	APP	VESLEQEAANER	C55H91N17O24[M+2H]	VESLEQEAANER(+H2)	687.828	53.03	1083631
3_11	3_11_01.raw	sp|P05067|A4_HUMAN	P05067	APP	VESLEQEAANER	C55H91N17O24[M+2H]	VESLEQEAANER(+H2)	687.828	53.03	632237
Chromatograms	FinalList2_2.raw	sp|P05067|A4_HUMAN	P05067	APP	TEEISEVK	C39H67N9O17[M+2H]	TEEISEVK(+H2)	467.74	42.61	489968
GPS01	GPS01_2.raw	sp|P05067|A4_HUMAN	P05067	APP	TEEISEVK	C39H67N9O17[M+2H]	TEEISEVK(+H2)	467.74	42.61	778294
GPS02	GPS02_2.raw	sp|P05067|A4_HUMAN	P05067	APP	TEEISEVK	C39H67N9O17[M+2H]	TEEISEVK(+H2)	467.74	42.61	773051
GPS03	GPS03_2.raw	sp|P05067|A4_HUMAN	P05067	APP	TEEISEVK	C39H67N9O17[M+2H]	TEEISEVK(+H2)	467.74	42.61	559285
GPS04	GPS04_2.raw	sp|P05067|A4_HUMAN	P05067	APP	TEEISEVK	C39H67N9O17[M+2H]	TEEISEVK(+H2)	467.74	42.61	519240
GPS05	GPS_05_02.raw	sp|P05067|A4_HUMAN	P05067	APP	TEEISEVK	C39H67N9O17[M+2H]	TEEISEVK(+H2)	467.74	42.61	333852
GPS06	GPS_06_02.raw	sp|P05067|A4_HUMAN	P05067	APP	TEEISEVK	C39H67N9O17[M+2H]	TEEISEVK(+H2)	467.74	42.61	271465
1_1	1_1_02.raw	sp|P05067|A4_HUMAN	P05067	APP	TEEISEVK	C39H67N9O17[M+2H]	TEEISEVK(+H2)	467.74	42.61	979350
1_2	1_2_02.raw	sp|P05067|A4_HUMAN	P05067	APP	TEEISEVK	C39H67N9O17[M+2H]	TEEISEVK(+H2)	467.74	42.61	2117703
1_3	1_3_02.raw	sp|P05067|A4_HUMAN	P05067	APP	TEEISEVK	C39H67N9O17[M+2H]	TEEISEVK(+H2)	467.74	42.61	1058959
2_1	2_1_02.raw	sp|P05067|A4_HUMAN	P05067	APP	TEEISEVK	C39H67N9O17[M+2H]	TEEISEVK(+H2)	467.74	42.61	1349200
2_2	2_2_02.raw	sp|P05067|A4_HUMAN	P05067	APP	TEEISEVK	C39H67N9O17[M+2H]	TEEISEVK(+H2)	467.74	42.61	603971
2_3	2_3_02.raw	sp|P05067|A4_HUMAN	P05067	APP	TEEISEVK	C39H67N9O17[M+2H]	TEEISEVK(+H2)	467.74	42.61	839829
3_1	3_1_02.raw	sp|P05067|A4_HUMAN	P05067	APP	TEEISEVK	C39H67N9O17[M+2H]	TEEISEVK(+H2)	467.74	42.61	495545
3_2	3_2_02.raw	sp|P05067|A4_HUMAN	P05067	APP	TEEISEVK	C39H67N9O17[M+2H]	TEEISEVK(+H2)	467.74	42.61	987103
3_3	3_3_02.raw	sp|P05067|A4_HUMAN	P05067	APP	TEEISEVK	C39H67N9O17[M+2H]	TEEISEVK(+H2)	467.74	42.61	383597
4_1	4_1_02.raw	sp|P05067|A4_HUMAN	P05067	APP	TEEISEVK	C39H67N9O17[M+2H]	TEEISEVK(+H2)	467.74	42.61	588782
4_2	4_2_02.raw	sp|P05067|A4_HUMAN	P05067	APP	TEEISEVK	C39H67N9O17[M+2H]	TEEISEVK(+H2)	467.74	42.61	712065
4_3	4_3_02.raw	sp|P05067|A4_HUMAN	P05067	APP	TEEISEVK	C39H67N9O17[M+2H]	TEEISEVK(+H2)	467.74	42.61	531826
1_4	1_4_02.raw	sp|P05067|A4_HUMAN	P05067	APP	TEEISEVK	C39H67N9O17[M+2H]	TEEISEVK(+H2)	467.74	42.61	472209
1_5	1_5_02.raw	sp|P05067|A4_HUMAN	P05067	APP	TEEISEVK	C39H67N9O17[M+2H]	TEEISEVK(+H2)	467.74	42.61	378016
1_6	1_6_02.raw	sp|P05067|A4_HUMAN	P05067	APP	TEEISEVK	C39H67N9O17[M+2H]	TEEISEVK(+H2)	467.74	42.61	681991
2_4	2_4_02.raw	sp|P05067|A4_HUMAN	P05067	APP	TEEISEVK	C39H67N9O17[M+2H]	TEEISEVK(+H2)	467.74	42.61	444137
2_5	2_5_02.raw	sp|P05067|A4_HUMAN	P05067	APP	TEEISEVK	C39H67N9O17[M+2H]	TEEISEVK(+H2)	467.74	42.61	460965
2_6	2_6_02.raw	sp|P05067|A4_HUMAN	P05067	APP	TEEISEVK	C39H67N9O17[M+2H]	TEEISEVK(+H2)	467.74	42.61	596554
3_4	3_4_02.raw	sp|P05067|A4_HUMAN	P05067	APP	TEEISEVK	C39H67N9O17[M+2H]	TEEISEVK(+H2)	467.74	42.61	135591
3_5	3_5_02.raw	sp|P05067|A4_HUMAN	P05067	APP	TEEISEVK	C39H67N9O17[M+2H]	TEEISEVK(+H2)	467.74	42.61	276814
3_6	3_6_02.raw	sp|P05067|A4_HUMAN	P05067	APP	TEEISEVK	C39H67N9O17[M+2H]	TEEISEVK(+H2)	467.74	42.61	588160
4_4	4_4_02.raw	sp|P05067|A4_HUMAN	P05067	APP	TEEISEVK	C39H67N9O17[M+2H]	TEEISEVK(+H2)	467.74	42.61	245365
4_5	4_5_02.raw	sp|P05067|A4_HUMAN	P05067	APP	TEEISEVK	C39H67N9O17[M+2H]	TEEISEVK(+H2)	467.74	42.61	110084
4_6	4_6_02.raw	sp|P05067|A4_HUMAN	P05067	APP	TEEISEVK	C39H67N9O17[M+2H]	TEEISEVK(+H2)	467.74	42.61	78413
1_7	1_7_02.raw	sp|P05067|A4_HUMAN	P05067	APP	TEEISEVK	C39H67N9O17[M+2H]	TEEISEVK(+H2)	467.74	42.61	221897
1_8	1_8_02.raw	sp|P05067|A4_HUMAN	P05067	APP	TEEISEVK	C39H67N9O17[M+2H]	TEEISEVK(+H2)	467.74	42.61	328526
1_9	1_9_02.raw	sp|P05067|A4_HUMAN	P05067	APP	TEEISEVK	C39H67N9O17[M+2H]	TEEISEVK(+H2)	467.74	42.61	607422
2_7	2_7_02.raw	sp|P05067|A4_HUMAN	P05067	APP	TEEISEVK	C39H67N9O17[M+2H]	TEEISEVK(+H2)	467.74	42.61	217732
2_8	2_8_02.raw	sp|P05067|A4_HUMAN	P05067	APP	TEEISEVK	C39H67N9O17[M+2H]	TEEISEVK(+H2)	467.74	42.61	689492
2_9	2_9_02_171217160937.raw	sp|P05067|A4_HUMAN	P05067	APP	TEEISEVK	C39H67N9O17[M+2H]	TEEISEVK(+H2)	467.74	42.61	391931
3_7	3_7_02.raw	sp|P05067|A4_HUMAN	P05067	APP	TEEISEVK	C39H67N9O17[M+2H]	TEEISEVK(+H2)	467.74	42.61	252430
3_8	3_8_02.raw	sp|P05067|A4_HUMAN	P05067	APP	TEEISEVK	C39H67N9O17[M+2H]	TEEISEVK(+H2)	467.74	42.61	354698
3_9	3_9_02.raw	sp|P05067|A4_HUMAN	P05067	APP	TEEISEVK	C39H67N9O17[M+2H]	TEEISEVK(+H2)	467.74	42.61	476375
4_7	4_7_02.raw	sp|P05067|A4_HUMAN	P05067	APP	TEEISEVK	C39H67N9O17[M+2H]	TEEISEVK(+H2)	467.74	42.61	474155
4_8	4_8_02.raw	sp|P05067|A4_HUMAN	P05067	APP	TEEISEVK	C39H67N9O17[M+2H]	TEEISEVK(+H2)	467.74	42.61	189665
4_9	4_9_02.raw	sp|P05067|A4_HUMAN	P05067	APP	TEEISEVK	C39H67N9O17[M+2H]	TEEISEVK(+H2)	467.74	42.61	175251
1_10	1_10_02.raw	sp|P05067|A4_HUMAN	P05067	APP	TEEISEVK	C39H67N9O17[M+2H]	TEEISEVK(+H2)	467.74	42.61	919718
1_11	1_11_02.raw	sp|P05067|A4_HUMAN	P05067	APP	TEEISEVK	C39H67N9O17[M+2H]	TEEISEVK(+H2)	467.74	42.61	844554
1_12	1_12_02.raw	sp|P05067|A4_HUMAN	P05067	APP	TEEISEVK	C39H67N9O17[M+2H]	TEEISEVK(+H2)	467.74	42.61	2464440
2_10	2_10_02.raw	sp|P05067|A4_HUMAN	P05067	APP	TEEISEVK	C39H67N9O17[M+2H]	TEEISEVK(+H2)	467.74	42.61	733465
2_11	2_11_02.raw	sp|P05067|A4_HUMAN	P05067	APP	TEEISEVK	C39H67N9O17[M+2H]	TEEISEVK(+H2)	467.74	42.61	713512
2_12	2_12_02.raw	sp|P05067|A4_HUMAN	P05067	APP	TEEISEVK	C39H67N9O17[M+2H]	TEEISEVK(+H2)	467.74	42.61	475702
3_10	3_10_02.raw	sp|P05067|A4_HUMAN	P05067	APP	TEEISEVK	C39H67N9O17[M+2H]	TEEISEVK(+H2)	467.74	42.61	440477
3_11	3_11_02.raw	sp|P05067|A4_HUMAN	P05067	APP	TEEISEVK	C39H67N9O17[M+2H]	TEEISEVK(+H2)	467.74	42.61	444489
Chromatograms	FinalList2_2.raw	sp|P05067|A4_HUMAN	P05067	APP	HDSGYEVHHQK	C57H81N19O19[M+3H]	HDSGYEVHHQK(+H3)	446.206	34.44	52091896
GPS01	GPS01_1.raw	sp|P05067|A4_HUMAN	P05067	APP	HDSGYEVHHQK	C57H81N19O19[M+3H]	HDSGYEVHHQK(+H3)	446.206	34.44	69295944
GPS02	GPS02_1.raw	sp|P05067|A4_HUMAN	P05067	APP	HDSGYEVHHQK	C57H81N19O19[M+3H]	HDSGYEVHHQK(+H3)	446.206	34.44	69912840
GPS03	GPS03_1.raw	sp|P05067|A4_HUMAN	P05067	APP	HDSGYEVHHQK	C57H81N19O19[M+3H]	HDSGYEVHHQK(+H3)	446.206	34.44	93284728
GPS04	GPS04_1.raw	sp|P05067|A4_HUMAN	P05067	APP	HDSGYEVHHQK	C57H81N19O19[M+3H]	HDSGYEVHHQK(+H3)	446.206	34.44	67224048
GPS05	GPS_05_01.raw	sp|P05067|A4_HUMAN	P05067	APP	HDSGYEVHHQK	C57H81N19O19[M+3H]	HDSGYEVHHQK(+H3)	446.206	34.44	40343320
GPS06	GPS_06_01.raw	sp|P05067|A4_HUMAN	P05067	APP	HDSGYEVHHQK	C57H81N19O19[M+3H]	HDSGYEVHHQK(+H3)	446.206	34.44	38697132
1_1	1_1_01.raw	sp|P05067|A4_HUMAN	P05067	APP	HDSGYEVHHQK	C57H81N19O19[M+3H]	HDSGYEVHHQK(+H3)	446.206	34.44	186137296
1_2	1_2_01.raw	sp|P05067|A4_HUMAN	P05067	APP	HDSGYEVHHQK	C57H81N19O19[M+3H]	HDSGYEVHHQK(+H3)	446.206	34.44	691552320
1_3	1_3_01.raw	sp|P05067|A4_HUMAN	P05067	APP	HDSGYEVHHQK	C57H81N19O19[M+3H]	HDSGYEVHHQK(+H3)	446.206	34.44	163687344
2_1	2_1_01.raw	sp|P05067|A4_HUMAN	P05067	APP	HDSGYEVHHQK	C57H81N19O19[M+3H]	HDSGYEVHHQK(+H3)	446.206	34.44	162082384
2_2	2_2_01.raw	sp|P05067|A4_HUMAN	P05067	APP	HDSGYEVHHQK	C57H81N19O19[M+3H]	HDSGYEVHHQK(+H3)	446.206	34.44	159673584
2_3	2_3_01.raw	sp|P05067|A4_HUMAN	P05067	APP	HDSGYEVHHQK	C57H81N19O19[M+3H]	HDSGYEVHHQK(+H3)	446.206	34.44	215932928
3_1	3_1_01.raw	sp|P05067|A4_HUMAN	P05067	APP	HDSGYEVHHQK	C57H81N19O19[M+3H]	HDSGYEVHHQK(+H3)	446.206	34.44	202545440
3_2	3_2_01_171223210221.raw	sp|P05067|A4_HUMAN	P05067	APP	HDSGYEVHHQK	C57H81N19O19[M+3H]	HDSGYEVHHQK(+H3)	446.206	34.44	275342944
3_3	3_3_01.raw	sp|P05067|A4_HUMAN	P05067	APP	HDSGYEVHHQK	C57H81N19O19[M+3H]	HDSGYEVHHQK(+H3)	446.206	34.44	72143400
4_1	4_1_01.raw	sp|P05067|A4_HUMAN	P05067	APP	HDSGYEVHHQK	C57H81N19O19[M+3H]	HDSGYEVHHQK(+H3)	446.206	34.44	33610876
4_2	4_2_01.raw	sp|P05067|A4_HUMAN	P05067	APP	HDSGYEVHHQK	C57H81N19O19[M+3H]	HDSGYEVHHQK(+H3)	446.206	34.44	168414304
4_3	4_3_01.raw	sp|P05067|A4_HUMAN	P05067	APP	HDSGYEVHHQK	C57H81N19O19[M+3H]	HDSGYEVHHQK(+H3)	446.206	34.44	126424256
1_4	1_4_01.raw	sp|P05067|A4_HUMAN	P05067	APP	HDSGYEVHHQK	C57H81N19O19[M+3H]	HDSGYEVHHQK(+H3)	446.206	34.44	101008
1_5	1_5_01.raw	sp|P05067|A4_HUMAN	P05067	APP	HDSGYEVHHQK	C57H81N19O19[M+3H]	HDSGYEVHHQK(+H3)	446.206	34.44	0
1_6	1_6_01.raw	sp|P05067|A4_HUMAN	P05067	APP	HDSGYEVHHQK	C57H81N19O19[M+3H]	HDSGYEVHHQK(+H3)	446.206	34.44	20154908
2_4	2_4_01.raw	sp|P05067|A4_HUMAN	P05067	APP	HDSGYEVHHQK	C57H81N19O19[M+3H]	HDSGYEVHHQK(+H3)	446.206	34.44	19457
2_5	2_5_01.raw	sp|P05067|A4_HUMAN	P05067	APP	HDSGYEVHHQK	C57H81N19O19[M+3H]	HDSGYEVHHQK(+H3)	446.206	34.44	10346191
2_6	2_6_01.raw	sp|P05067|A4_HUMAN	P05067	APP	HDSGYEVHHQK	C57H81N19O19[M+3H]	HDSGYEVHHQK(+H3)	446.206	34.44	0
3_4	3_4_01.raw	sp|P05067|A4_HUMAN	P05067	APP	HDSGYEVHHQK	C57H81N19O19[M+3H]	HDSGYEVHHQK(+H3)	446.206	34.44	0
3_5	3_5_01.raw	sp|P05067|A4_HUMAN	P05067	APP	HDSGYEVHHQK	C57H81N19O19[M+3H]	HDSGYEVHHQK(+H3)	446.206	34.44	0
3_6	3_6_01.raw	sp|P05067|A4_HUMAN	P05067	APP	HDSGYEVHHQK	C57H81N19O19[M+3H]	HDSGYEVHHQK(+H3)	446.206	34.44	57254
4_4	4_4_01.raw	sp|P05067|A4_HUMAN	P05067	APP	HDSGYEVHHQK	C57H81N19O19[M+3H]	HDSGYEVHHQK(+H3)	446.206	34.44	423783
4_5	4_5_01.raw	sp|P05067|A4_HUMAN	P05067	APP	HDSGYEVHHQK	C57H81N19O19[M+3H]	HDSGYEVHHQK(+H3)	446.206	34.44	58881
4_6	4_6_01.raw	sp|P05067|A4_HUMAN	P05067	APP	HDSGYEVHHQK	C57H81N19O19[M+3H]	HDSGYEVHHQK(+H3)	446.206	34.44	17409484
1_7	1_7_01.raw	sp|P05067|A4_HUMAN	P05067	APP	HDSGYEVHHQK	C57H81N19O19[M+3H]	HDSGYEVHHQK(+H3)	446.206	34.44	1186972
1_8	1_8_01_171211223541.raw	sp|P05067|A4_HUMAN	P05067	APP	HDSGYEVHHQK	C57H81N19O19[M+3H]	HDSGYEVHHQK(+H3)	446.206	34.44	0
1_9	1_9_01.raw	sp|P05067|A4_HUMAN	P05067	APP	HDSGYEVHHQK	C57H81N19O19[M+3H]	HDSGYEVHHQK(+H3)	446.206	34.44	191636
2_7	2_7_01.raw	sp|P05067|A4_HUMAN	P05067	APP	HDSGYEVHHQK	C57H81N19O19[M+3H]	HDSGYEVHHQK(+H3)	446.206	34.44	273968
2_8	2_8_01.raw	sp|P05067|A4_HUMAN	P05067	APP	HDSGYEVHHQK	C57H81N19O19[M+3H]	HDSGYEVHHQK(+H3)	446.206	34.44	158245
2_9	2_9_01_171217123101.raw	sp|P05067|A4_HUMAN	P05067	APP	HDSGYEVHHQK	C57H81N19O19[M+3H]	HDSGYEVHHQK(+H3)	446.206	34.44	0
3_7	3_7_01.raw	sp|P05067|A4_HUMAN	P05067	APP	HDSGYEVHHQK	C57H81N19O19[M+3H]	HDSGYEVHHQK(+H3)	446.206	34.44	0
3_8	3_8_01.raw	sp|P05067|A4_HUMAN	P05067	APP	HDSGYEVHHQK	C57H81N19O19[M+3H]	HDSGYEVHHQK(+H3)	446.206	34.44	0
3_9	3_9_01.raw	sp|P05067|A4_HUMAN	P05067	APP	HDSGYEVHHQK	C57H81N19O19[M+3H]	HDSGYEVHHQK(+H3)	446.206	34.44	0
4_7	4_7_01.raw	sp|P05067|A4_HUMAN	P05067	APP	HDSGYEVHHQK	C57H81N19O19[M+3H]	HDSGYEVHHQK(+H3)	446.206	34.44	14965301
4_8	4_8_01.raw	sp|P05067|A4_HUMAN	P05067	APP	HDSGYEVHHQK	C57H81N19O19[M+3H]	HDSGYEVHHQK(+H3)	446.206	34.44	164874
4_9	4_9_01.raw	sp|P05067|A4_HUMAN	P05067	APP	HDSGYEVHHQK	C57H81N19O19[M+3H]	HDSGYEVHHQK(+H3)	446.206	34.44	34344
1_10	1_10_01.raw	sp|P05067|A4_HUMAN	P05067	APP	HDSGYEVHHQK	C57H81N19O19[M+3H]	HDSGYEVHHQK(+H3)	446.206	34.44	50709328
1_11	1_11_01.raw	sp|P05067|A4_HUMAN	P05067	APP	HDSGYEVHHQK	C57H81N19O19[M+3H]	HDSGYEVHHQK(+H3)	446.206	34.44	142002240
1_12	1_12_01.raw	sp|P05067|A4_HUMAN	P05067	APP	HDSGYEVHHQK	C57H81N19O19[M+3H]	HDSGYEVHHQK(+H3)	446.206	34.44	323954272
2_10	2_10_01.raw	sp|P05067|A4_HUMAN	P05067	APP	HDSGYEVHHQK	C57H81N19O19[M+3H]	HDSGYEVHHQK(+H3)	446.206	34.44	58595992
2_11	2_11_01_171223040132.raw	sp|P05067|A4_HUMAN	P05067	APP	HDSGYEVHHQK	C57H81N19O19[M+3H]	HDSGYEVHHQK(+H3)	446.206	34.44	189426672
2_12	2_12_01.raw	sp|P05067|A4_HUMAN	P05067	APP	HDSGYEVHHQK	C57H81N19O19[M+3H]	HDSGYEVHHQK(+H3)	446.206	34.44	37816356
3_10	3_10_01.raw	sp|P05067|A4_HUMAN	P05067	APP	HDSGYEVHHQK	C57H81N19O19[M+3H]	HDSGYEVHHQK(+H3)	446.206	34.44	104859784
3_11	3_11_01.raw	sp|P05067|A4_HUMAN	P05067	APP	HDSGYEVHHQK	C57H81N19O19[M+3H]	HDSGYEVHHQK(+H3)	446.206	34.44	18736902
Chromatograms	FinalList2_2.raw	sp|P05067|A4_HUMAN	P05067	APP	LVFFAEDVGSNK	C61H92N14O19[M+2H]	LVFFAEDVGSNK(+H2)	663.34	88.68	1288468864
GPS01	GPS01_2.raw	sp|P05067|A4_HUMAN	P05067	APP	LVFFAEDVGSNK	C61H92N14O19[M+2H]	LVFFAEDVGSNK(+H2)	663.34	88.68	3096011008
GPS02	GPS02_2.raw	sp|P05067|A4_HUMAN	P05067	APP	LVFFAEDVGSNK	C61H92N14O19[M+2H]	LVFFAEDVGSNK(+H2)	663.34	88.68	2905346560
GPS03	GPS03_2.raw	sp|P05067|A4_HUMAN	P05067	APP	LVFFAEDVGSNK	C61H92N14O19[M+2H]	LVFFAEDVGSNK(+H2)	663.34	88.68	2305151232
GPS04	GPS04_2.raw	sp|P05067|A4_HUMAN	P05067	APP	LVFFAEDVGSNK	C61H92N14O19[M+2H]	LVFFAEDVGSNK(+H2)	663.34	88.68	2174702592
GPS05	GPS_05_02.raw	sp|P05067|A4_HUMAN	P05067	APP	LVFFAEDVGSNK	C61H92N14O19[M+2H]	LVFFAEDVGSNK(+H2)	663.34	88.68	2091896704
GPS06	GPS_06_02.raw	sp|P05067|A4_HUMAN	P05067	APP	LVFFAEDVGSNK	C61H92N14O19[M+2H]	LVFFAEDVGSNK(+H2)	663.34	88.68	1915451776
1_1	1_1_02.raw	sp|P05067|A4_HUMAN	P05067	APP	LVFFAEDVGSNK	C61H92N14O19[M+2H]	LVFFAEDVGSNK(+H2)	663.34	88.68	6915076096
1_2	1_2_02.raw	sp|P05067|A4_HUMAN	P05067	APP	LVFFAEDVGSNK	C61H92N14O19[M+2H]	LVFFAEDVGSNK(+H2)	663.34	88.68	18243057664
1_3	1_3_02.raw	sp|P05067|A4_HUMAN	P05067	APP	LVFFAEDVGSNK	C61H92N14O19[M+2H]	LVFFAEDVGSNK(+H2)	663.34	88.68	3313035520
2_1	2_1_02.raw	sp|P05067|A4_HUMAN	P05067	APP	LVFFAEDVGSNK	C61H92N14O19[M+2H]	LVFFAEDVGSNK(+H2)	663.34	88.68	4925822976
2_2	2_2_02.raw	sp|P05067|A4_HUMAN	P05067	APP	LVFFAEDVGSNK	C61H92N14O19[M+2H]	LVFFAEDVGSNK(+H2)	663.34	88.68	3082751232
2_3	2_3_02.raw	sp|P05067|A4_HUMAN	P05067	APP	LVFFAEDVGSNK	C61H92N14O19[M+2H]	LVFFAEDVGSNK(+H2)	663.34	88.68	5014008832
3_1	3_1_02.raw	sp|P05067|A4_HUMAN	P05067	APP	LVFFAEDVGSNK	C61H92N14O19[M+2H]	LVFFAEDVGSNK(+H2)	663.34	88.68	3264162560
3_2	3_2_02.raw	sp|P05067|A4_HUMAN	P05067	APP	LVFFAEDVGSNK	C61H92N14O19[M+2H]	LVFFAEDVGSNK(+H2)	663.34	88.68	3428049920
3_3	3_3_02.raw	sp|P05067|A4_HUMAN	P05067	APP	LVFFAEDVGSNK	C61H92N14O19[M+2H]	LVFFAEDVGSNK(+H2)	663.34	88.68	1237738752
4_1	4_1_02.raw	sp|P05067|A4_HUMAN	P05067	APP	LVFFAEDVGSNK	C61H92N14O19[M+2H]	LVFFAEDVGSNK(+H2)	663.34	88.68	5394148352
4_2	4_2_02.raw	sp|P05067|A4_HUMAN	P05067	APP	LVFFAEDVGSNK	C61H92N14O19[M+2H]	LVFFAEDVGSNK(+H2)	663.34	88.68	5010818560
4_3	4_3_02.raw	sp|P05067|A4_HUMAN	P05067	APP	LVFFAEDVGSNK	C61H92N14O19[M+2H]	LVFFAEDVGSNK(+H2)	663.34	88.68	3320607744
1_4	1_4_02.raw	sp|P05067|A4_HUMAN	P05067	APP	LVFFAEDVGSNK	C61H92N14O19[M+2H]	LVFFAEDVGSNK(+H2)	663.34	88.68	35815980
1_5	1_5_02.raw	sp|P05067|A4_HUMAN	P05067	APP	LVFFAEDVGSNK	C61H92N14O19[M+2H]	LVFFAEDVGSNK(+H2)	663.34	88.68	4069224
1_6	1_6_02.raw	sp|P05067|A4_HUMAN	P05067	APP	LVFFAEDVGSNK	C61H92N14O19[M+2H]	LVFFAEDVGSNK(+H2)	663.34	88.68	316898016
2_4	2_4_02.raw	sp|P05067|A4_HUMAN	P05067	APP	LVFFAEDVGSNK	C61H92N14O19[M+2H]	LVFFAEDVGSNK(+H2)	663.34	88.68	16147539
2_5	2_5_02.raw	sp|P05067|A4_HUMAN	P05067	APP	LVFFAEDVGSNK	C61H92N14O19[M+2H]	LVFFAEDVGSNK(+H2)	663.34	88.68	338485696
2_6	2_6_02.raw	sp|P05067|A4_HUMAN	P05067	APP	LVFFAEDVGSNK	C61H92N14O19[M+2H]	LVFFAEDVGSNK(+H2)	663.34	88.68	9513887
3_4	3_4_02.raw	sp|P05067|A4_HUMAN	P05067	APP	LVFFAEDVGSNK	C61H92N14O19[M+2H]	LVFFAEDVGSNK(+H2)	663.34	88.68	1904524
3_5	3_5_02.raw	sp|P05067|A4_HUMAN	P05067	APP	LVFFAEDVGSNK	C61H92N14O19[M+2H]	LVFFAEDVGSNK(+H2)	663.34	88.68	1628679
3_6	3_6_02.raw	sp|P05067|A4_HUMAN	P05067	APP	LVFFAEDVGSNK	C61H92N14O19[M+2H]	LVFFAEDVGSNK(+H2)	663.34	88.68	26301518
4_4	4_4_02.raw	sp|P05067|A4_HUMAN	P05067	APP	LVFFAEDVGSNK	C61H92N14O19[M+2H]	LVFFAEDVGSNK(+H2)	663.34	88.68	6406132
4_5	4_5_02.raw	sp|P05067|A4_HUMAN	P05067	APP	LVFFAEDVGSNK	C61H92N14O19[M+2H]	LVFFAEDVGSNK(+H2)	663.34	88.68	4549782
4_6	4_6_02.raw	sp|P05067|A4_HUMAN	P05067	APP	LVFFAEDVGSNK	C61H92N14O19[M+2H]	LVFFAEDVGSNK(+H2)	663.34	88.68	539773696
1_7	1_7_02.raw	sp|P05067|A4_HUMAN	P05067	APP	LVFFAEDVGSNK	C61H92N14O19[M+2H]	LVFFAEDVGSNK(+H2)	663.34	88.68	54254792
1_8	1_8_02.raw	sp|P05067|A4_HUMAN	P05067	APP	LVFFAEDVGSNK	C61H92N14O19[M+2H]	LVFFAEDVGSNK(+H2)	663.34	88.68	2829453
1_9	1_9_02.raw	sp|P05067|A4_HUMAN	P05067	APP	LVFFAEDVGSNK	C61H92N14O19[M+2H]	LVFFAEDVGSNK(+H2)	663.34	88.68	12267098
2_7	2_7_02.raw	sp|P05067|A4_HUMAN	P05067	APP	LVFFAEDVGSNK	C61H92N14O19[M+2H]	LVFFAEDVGSNK(+H2)	663.34	88.68	43381020
2_8	2_8_02.raw	sp|P05067|A4_HUMAN	P05067	APP	LVFFAEDVGSNK	C61H92N14O19[M+2H]	LVFFAEDVGSNK(+H2)	663.34	88.68	23940792
2_9	2_9_02_171217160937.raw	sp|P05067|A4_HUMAN	P05067	APP	LVFFAEDVGSNK	C61H92N14O19[M+2H]	LVFFAEDVGSNK(+H2)	663.34	88.68	2992917
3_7	3_7_02.raw	sp|P05067|A4_HUMAN	P05067	APP	LVFFAEDVGSNK	C61H92N14O19[M+2H]	LVFFAEDVGSNK(+H2)	663.34	88.68	2822887
3_8	3_8_02.raw	sp|P05067|A4_HUMAN	P05067	APP	LVFFAEDVGSNK	C61H92N14O19[M+2H]	LVFFAEDVGSNK(+H2)	663.34	88.68	983527
3_9	3_9_02.raw	sp|P05067|A4_HUMAN	P05067	APP	LVFFAEDVGSNK	C61H92N14O19[M+2H]	LVFFAEDVGSNK(+H2)	663.34	88.68	2520699
4_7	4_7_02.raw	sp|P05067|A4_HUMAN	P05067	APP	LVFFAEDVGSNK	C61H92N14O19[M+2H]	LVFFAEDVGSNK(+H2)	663.34	88.68	282911840
4_8	4_8_02.raw	sp|P05067|A4_HUMAN	P05067	APP	LVFFAEDVGSNK	C61H92N14O19[M+2H]	LVFFAEDVGSNK(+H2)	663.34	88.68	2297877
4_9	4_9_02.raw	sp|P05067|A4_HUMAN	P05067	APP	LVFFAEDVGSNK	C61H92N14O19[M+2H]	LVFFAEDVGSNK(+H2)	663.34	88.68	3256296
1_10	1_10_02.raw	sp|P05067|A4_HUMAN	P05067	APP	LVFFAEDVGSNK	C61H92N14O19[M+2H]	LVFFAEDVGSNK(+H2)	663.34	88.68	918689792
1_11	1_11_02.raw	sp|P05067|A4_HUMAN	P05067	APP	LVFFAEDVGSNK	C61H92N14O19[M+2H]	LVFFAEDVGSNK(+H2)	663.34	88.68	2759938816
1_12	1_12_02.raw	sp|P05067|A4_HUMAN	P05067	APP	LVFFAEDVGSNK	C61H92N14O19[M+2H]	LVFFAEDVGSNK(+H2)	663.34	88.68	6018735104
2_10	2_10_02.raw	sp|P05067|A4_HUMAN	P05067	APP	LVFFAEDVGSNK	C61H92N14O19[M+2H]	LVFFAEDVGSNK(+H2)	663.34	88.68	2150524928
2_11	2_11_02.raw	sp|P05067|A4_HUMAN	P05067	APP	LVFFAEDVGSNK	C61H92N14O19[M+2H]	LVFFAEDVGSNK(+H2)	663.34	88.68	2498679808
2_12	2_12_02.raw	sp|P05067|A4_HUMAN	P05067	APP	LVFFAEDVGSNK	C61H92N14O19[M+2H]	LVFFAEDVGSNK(+H2)	663.34	88.68	653842560
3_10	3_10_02.raw	sp|P05067|A4_HUMAN	P05067	APP	LVFFAEDVGSNK	C61H92N14O19[M+2H]	LVFFAEDVGSNK(+H2)	663.34	88.68	1613268224
3_11	3_11_02.raw	sp|P05067|A4_HUMAN	P05067	APP	LVFFAEDVGSNK	C61H92N14O19[M+2H]	LVFFAEDVGSNK(+H2)	663.34	88.68	762224896
Chromatograms	FinalList2_2.raw	sp|Q9NWB6|ARGL1_HUMAN	Q9NWB6	ARGLU1	LIEEETAR	C40H69N11O16[M+2H]	LIEEETAR(+H2)	480.753	41.86	5288164
GPS01	GPS01_1.raw	sp|Q9NWB6|ARGL1_HUMAN	Q9NWB6	ARGLU1	LIEEETAR	C40H69N11O16[M+2H]	LIEEETAR(+H2)	480.753	41.86	34763076
GPS02	GPS02_1.raw	sp|Q9NWB6|ARGL1_HUMAN	Q9NWB6	ARGLU1	LIEEETAR	C40H69N11O16[M+2H]	LIEEETAR(+H2)	480.753	41.86	34286132
GPS03	GPS03_1.raw	sp|Q9NWB6|ARGL1_HUMAN	Q9NWB6	ARGLU1	LIEEETAR	C40H69N11O16[M+2H]	LIEEETAR(+H2)	480.753	41.86	20471410
GPS04	GPS04_1.raw	sp|Q9NWB6|ARGL1_HUMAN	Q9NWB6	ARGLU1	LIEEETAR	C40H69N11O16[M+2H]	LIEEETAR(+H2)	480.753	41.86	20691088
GPS05	GPS_05_01.raw	sp|Q9NWB6|ARGL1_HUMAN	Q9NWB6	ARGLU1	LIEEETAR	C40H69N11O16[M+2H]	LIEEETAR(+H2)	480.753	41.86	11888281
GPS06	GPS_06_01.raw	sp|Q9NWB6|ARGL1_HUMAN	Q9NWB6	ARGLU1	LIEEETAR	C40H69N11O16[M+2H]	LIEEETAR(+H2)	480.753	41.86	11552945
1_1	1_1_01.raw	sp|Q9NWB6|ARGL1_HUMAN	Q9NWB6	ARGLU1	LIEEETAR	C40H69N11O16[M+2H]	LIEEETAR(+H2)	480.753	41.86	39151984
1_2	1_2_01.raw	sp|Q9NWB6|ARGL1_HUMAN	Q9NWB6	ARGLU1	LIEEETAR	C40H69N11O16[M+2H]	LIEEETAR(+H2)	480.753	41.86	22595098
1_3	1_3_01.raw	sp|Q9NWB6|ARGL1_HUMAN	Q9NWB6	ARGLU1	LIEEETAR	C40H69N11O16[M+2H]	LIEEETAR(+H2)	480.753	41.86	28530236
2_1	2_1_01.raw	sp|Q9NWB6|ARGL1_HUMAN	Q9NWB6	ARGLU1	LIEEETAR	C40H69N11O16[M+2H]	LIEEETAR(+H2)	480.753	41.86	53703616
2_2	2_2_01.raw	sp|Q9NWB6|ARGL1_HUMAN	Q9NWB6	ARGLU1	LIEEETAR	C40H69N11O16[M+2H]	LIEEETAR(+H2)	480.753	41.86	18500860
2_3	2_3_01.raw	sp|Q9NWB6|ARGL1_HUMAN	Q9NWB6	ARGLU1	LIEEETAR	C40H69N11O16[M+2H]	LIEEETAR(+H2)	480.753	41.86	31725030
3_1	3_1_01.raw	sp|Q9NWB6|ARGL1_HUMAN	Q9NWB6	ARGLU1	LIEEETAR	C40H69N11O16[M+2H]	LIEEETAR(+H2)	480.753	41.86	49425712
3_2	3_2_01_171223210221.raw	sp|Q9NWB6|ARGL1_HUMAN	Q9NWB6	ARGLU1	LIEEETAR	C40H69N11O16[M+2H]	LIEEETAR(+H2)	480.753	41.86	14850357
3_3	3_3_01.raw	sp|Q9NWB6|ARGL1_HUMAN	Q9NWB6	ARGLU1	LIEEETAR	C40H69N11O16[M+2H]	LIEEETAR(+H2)	480.753	41.86	6154346
4_1	4_1_01.raw	sp|Q9NWB6|ARGL1_HUMAN	Q9NWB6	ARGLU1	LIEEETAR	C40H69N11O16[M+2H]	LIEEETAR(+H2)	480.753	41.86	4999861
4_2	4_2_01.raw	sp|Q9NWB6|ARGL1_HUMAN	Q9NWB6	ARGLU1	LIEEETAR	C40H69N11O16[M+2H]	LIEEETAR(+H2)	480.753	41.86	16697124
4_3	4_3_01.raw	sp|Q9NWB6|ARGL1_HUMAN	Q9NWB6	ARGLU1	LIEEETAR	C40H69N11O16[M+2H]	LIEEETAR(+H2)	480.753	41.86	15945915
1_4	1_4_01.raw	sp|Q9NWB6|ARGL1_HUMAN	Q9NWB6	ARGLU1	LIEEETAR	C40H69N11O16[M+2H]	LIEEETAR(+H2)	480.753	41.86	23783896
1_5	1_5_01.raw	sp|Q9NWB6|ARGL1_HUMAN	Q9NWB6	ARGLU1	LIEEETAR	C40H69N11O16[M+2H]	LIEEETAR(+H2)	480.753	41.86	11424730
1_6	1_6_01.raw	sp|Q9NWB6|ARGL1_HUMAN	Q9NWB6	ARGLU1	LIEEETAR	C40H69N11O16[M+2H]	LIEEETAR(+H2)	480.753	41.86	18198706
2_4	2_4_01.raw	sp|Q9NWB6|ARGL1_HUMAN	Q9NWB6	ARGLU1	LIEEETAR	C40H69N11O16[M+2H]	LIEEETAR(+H2)	480.753	41.86	39238740
2_5	2_5_01.raw	sp|Q9NWB6|ARGL1_HUMAN	Q9NWB6	ARGLU1	LIEEETAR	C40H69N11O16[M+2H]	LIEEETAR(+H2)	480.753	41.86	7296574
2_6	2_6_01.raw	sp|Q9NWB6|ARGL1_HUMAN	Q9NWB6	ARGLU1	LIEEETAR	C40H69N11O16[M+2H]	LIEEETAR(+H2)	480.753	41.86	15775769
3_4	3_4_01.raw	sp|Q9NWB6|ARGL1_HUMAN	Q9NWB6	ARGLU1	LIEEETAR	C40H69N11O16[M+2H]	LIEEETAR(+H2)	480.753	41.86	16054183
3_5	3_5_01.raw	sp|Q9NWB6|ARGL1_HUMAN	Q9NWB6	ARGLU1	LIEEETAR	C40H69N11O16[M+2H]	LIEEETAR(+H2)	480.753	41.86	28705444
3_6	3_6_01.raw	sp|Q9NWB6|ARGL1_HUMAN	Q9NWB6	ARGLU1	LIEEETAR	C40H69N11O16[M+2H]	LIEEETAR(+H2)	480.753	41.86	73993280
4_4	4_4_01.raw	sp|Q9NWB6|ARGL1_HUMAN	Q9NWB6	ARGLU1	LIEEETAR	C40H69N11O16[M+2H]	LIEEETAR(+H2)	480.753	41.86	3496436
4_5	4_5_01.raw	sp|Q9NWB6|ARGL1_HUMAN	Q9NWB6	ARGLU1	LIEEETAR	C40H69N11O16[M+2H]	LIEEETAR(+H2)	480.753	41.86	12813280
4_6	4_6_01.raw	sp|Q9NWB6|ARGL1_HUMAN	Q9NWB6	ARGLU1	LIEEETAR	C40H69N11O16[M+2H]	LIEEETAR(+H2)	480.753	41.86	7716765
1_7	1_7_01.raw	sp|Q9NWB6|ARGL1_HUMAN	Q9NWB6	ARGLU1	LIEEETAR	C40H69N11O16[M+2H]	LIEEETAR(+H2)	480.753	41.86	52549036
1_8	1_8_01_171211223541.raw	sp|Q9NWB6|ARGL1_HUMAN	Q9NWB6	ARGLU1	LIEEETAR	C40H69N11O16[M+2H]	LIEEETAR(+H2)	480.753	41.86	26437552
1_9	1_9_01.raw	sp|Q9NWB6|ARGL1_HUMAN	Q9NWB6	ARGLU1	LIEEETAR	C40H69N11O16[M+2H]	LIEEETAR(+H2)	480.753	41.86	15265869
2_7	2_7_01.raw	sp|Q9NWB6|ARGL1_HUMAN	Q9NWB6	ARGLU1	LIEEETAR	C40H69N11O16[M+2H]	LIEEETAR(+H2)	480.753	41.86	69987728
2_8	2_8_01.raw	sp|Q9NWB6|ARGL1_HUMAN	Q9NWB6	ARGLU1	LIEEETAR	C40H69N11O16[M+2H]	LIEEETAR(+H2)	480.753	41.86	26091054
2_9	2_9_01_171217123101.raw	sp|Q9NWB6|ARGL1_HUMAN	Q9NWB6	ARGLU1	LIEEETAR	C40H69N11O16[M+2H]	LIEEETAR(+H2)	480.753	41.86	6947886
3_7	3_7_01.raw	sp|Q9NWB6|ARGL1_HUMAN	Q9NWB6	ARGLU1	LIEEETAR	C40H69N11O16[M+2H]	LIEEETAR(+H2)	480.753	41.86	34897184
3_8	3_8_01.raw	sp|Q9NWB6|ARGL1_HUMAN	Q9NWB6	ARGLU1	LIEEETAR	C40H69N11O16[M+2H]	LIEEETAR(+H2)	480.753	41.86	10123298
3_9	3_9_01.raw	sp|Q9NWB6|ARGL1_HUMAN	Q9NWB6	ARGLU1	LIEEETAR	C40H69N11O16[M+2H]	LIEEETAR(+H2)	480.753	41.86	15403446
4_7	4_7_01.raw	sp|Q9NWB6|ARGL1_HUMAN	Q9NWB6	ARGLU1	LIEEETAR	C40H69N11O16[M+2H]	LIEEETAR(+H2)	480.753	41.86	8885088
4_8	4_8_01.raw	sp|Q9NWB6|ARGL1_HUMAN	Q9NWB6	ARGLU1	LIEEETAR	C40H69N11O16[M+2H]	LIEEETAR(+H2)	480.753	41.86	5059482
4_9	4_9_01.raw	sp|Q9NWB6|ARGL1_HUMAN	Q9NWB6	ARGLU1	LIEEETAR	C40H69N11O16[M+2H]	LIEEETAR(+H2)	480.753	41.86	7188832
1_10	1_10_01.raw	sp|Q9NWB6|ARGL1_HUMAN	Q9NWB6	ARGLU1	LIEEETAR	C40H69N11O16[M+2H]	LIEEETAR(+H2)	480.753	41.86	40780064
1_11	1_11_01.raw	sp|Q9NWB6|ARGL1_HUMAN	Q9NWB6	ARGLU1	LIEEETAR	C40H69N11O16[M+2H]	LIEEETAR(+H2)	480.753	41.86	3745782
1_12	1_12_01.raw	sp|Q9NWB6|ARGL1_HUMAN	Q9NWB6	ARGLU1	LIEEETAR	C40H69N11O16[M+2H]	LIEEETAR(+H2)	480.753	41.86	49899604
2_10	2_10_01.raw	sp|Q9NWB6|ARGL1_HUMAN	Q9NWB6	ARGLU1	LIEEETAR	C40H69N11O16[M+2H]	LIEEETAR(+H2)	480.753	41.86	30373188
2_11	2_11_01_171223040132.raw	sp|Q9NWB6|ARGL1_HUMAN	Q9NWB6	ARGLU1	LIEEETAR	C40H69N11O16[M+2H]	LIEEETAR(+H2)	480.753	41.86	23154428
2_12	2_12_01.raw	sp|Q9NWB6|ARGL1_HUMAN	Q9NWB6	ARGLU1	LIEEETAR	C40H69N11O16[M+2H]	LIEEETAR(+H2)	480.753	41.86	20762672
3_10	3_10_01.raw	sp|Q9NWB6|ARGL1_HUMAN	Q9NWB6	ARGLU1	LIEEETAR	C40H69N11O16[M+2H]	LIEEETAR(+H2)	480.753	41.86	29316600
3_11	3_11_01.raw	sp|Q9NWB6|ARGL1_HUMAN	Q9NWB6	ARGLU1	LIEEETAR	C40H69N11O16[M+2H]	LIEEETAR(+H2)	480.753	41.86	4687102
Chromatograms	FinalList2_2.raw	sp|Q92974|ARHG2_HUMAN	Q92974	ARHGEF2	EALIC[+57]PTC[+57]NVTIHNR	C74H124N24O24S2[M+3H]	EALICPTCNVTIHNR(+H3)	599.963	62.65	8273116
GPS01	GPS01_1.raw	sp|Q92974|ARHG2_HUMAN	Q92974	ARHGEF2	EALIC[+57]PTC[+57]NVTIHNR	C74H124N24O24S2[M+3H]	EALICPTCNVTIHNR(+H3)	599.963	62.65	10909674
GPS02	GPS02_1.raw	sp|Q92974|ARHG2_HUMAN	Q92974	ARHGEF2	EALIC[+57]PTC[+57]NVTIHNR	C74H124N24O24S2[M+3H]	EALICPTCNVTIHNR(+H3)	599.963	62.65	9009491
GPS03	GPS03_1.raw	sp|Q92974|ARHG2_HUMAN	Q92974	ARHGEF2	EALIC[+57]PTC[+57]NVTIHNR	C74H124N24O24S2[M+3H]	EALICPTCNVTIHNR(+H3)	599.963	62.65	7170559
GPS04	GPS04_1.raw	sp|Q92974|ARHG2_HUMAN	Q92974	ARHGEF2	EALIC[+57]PTC[+57]NVTIHNR	C74H124N24O24S2[M+3H]	EALICPTCNVTIHNR(+H3)	599.963	62.65	6781815
GPS05	GPS_05_01.raw	sp|Q92974|ARHG2_HUMAN	Q92974	ARHGEF2	EALIC[+57]PTC[+57]NVTIHNR	C74H124N24O24S2[M+3H]	EALICPTCNVTIHNR(+H3)	599.963	62.65	4898319
GPS06	GPS_06_01.raw	sp|Q92974|ARHG2_HUMAN	Q92974	ARHGEF2	EALIC[+57]PTC[+57]NVTIHNR	C74H124N24O24S2[M+3H]	EALICPTCNVTIHNR(+H3)	599.963	62.65	4221005
1_1	1_1_01.raw	sp|Q92974|ARHG2_HUMAN	Q92974	ARHGEF2	EALIC[+57]PTC[+57]NVTIHNR	C74H124N24O24S2[M+3H]	EALICPTCNVTIHNR(+H3)	599.963	62.65	9423641
1_2	1_2_01.raw	sp|Q92974|ARHG2_HUMAN	Q92974	ARHGEF2	EALIC[+57]PTC[+57]NVTIHNR	C74H124N24O24S2[M+3H]	EALICPTCNVTIHNR(+H3)	599.963	62.65	12476904
1_3	1_3_01.raw	sp|Q92974|ARHG2_HUMAN	Q92974	ARHGEF2	EALIC[+57]PTC[+57]NVTIHNR	C74H124N24O24S2[M+3H]	EALICPTCNVTIHNR(+H3)	599.963	62.65	11187491
2_1	2_1_01.raw	sp|Q92974|ARHG2_HUMAN	Q92974	ARHGEF2	EALIC[+57]PTC[+57]NVTIHNR	C74H124N24O24S2[M+3H]	EALICPTCNVTIHNR(+H3)	599.963	62.65	3847997
2_2	2_2_01.raw	sp|Q92974|ARHG2_HUMAN	Q92974	ARHGEF2	EALIC[+57]PTC[+57]NVTIHNR	C74H124N24O24S2[M+3H]	EALICPTCNVTIHNR(+H3)	599.963	62.65	9276126
2_3	2_3_01.raw	sp|Q92974|ARHG2_HUMAN	Q92974	ARHGEF2	EALIC[+57]PTC[+57]NVTIHNR	C74H124N24O24S2[M+3H]	EALICPTCNVTIHNR(+H3)	599.963	62.65	9718667
3_1	3_1_01.raw	sp|Q92974|ARHG2_HUMAN	Q92974	ARHGEF2	EALIC[+57]PTC[+57]NVTIHNR	C74H124N24O24S2[M+3H]	EALICPTCNVTIHNR(+H3)	599.963	62.65	5750138
3_2	3_2_01_171223210221.raw	sp|Q92974|ARHG2_HUMAN	Q92974	ARHGEF2	EALIC[+57]PTC[+57]NVTIHNR	C74H124N24O24S2[M+3H]	EALICPTCNVTIHNR(+H3)	599.963	62.65	5174190
3_3	3_3_01.raw	sp|Q92974|ARHG2_HUMAN	Q92974	ARHGEF2	EALIC[+57]PTC[+57]NVTIHNR	C74H124N24O24S2[M+3H]	EALICPTCNVTIHNR(+H3)	599.963	62.65	4935269
4_1	4_1_01.raw	sp|Q92974|ARHG2_HUMAN	Q92974	ARHGEF2	EALIC[+57]PTC[+57]NVTIHNR	C74H124N24O24S2[M+3H]	EALICPTCNVTIHNR(+H3)	599.963	62.65	1298709
4_2	4_2_01.raw	sp|Q92974|ARHG2_HUMAN	Q92974	ARHGEF2	EALIC[+57]PTC[+57]NVTIHNR	C74H124N24O24S2[M+3H]	EALICPTCNVTIHNR(+H3)	599.963	62.65	2295393
4_3	4_3_01.raw	sp|Q92974|ARHG2_HUMAN	Q92974	ARHGEF2	EALIC[+57]PTC[+57]NVTIHNR	C74H124N24O24S2[M+3H]	EALICPTCNVTIHNR(+H3)	599.963	62.65	3828742
1_4	1_4_01.raw	sp|Q92974|ARHG2_HUMAN	Q92974	ARHGEF2	EALIC[+57]PTC[+57]NVTIHNR	C74H124N24O24S2[M+3H]	EALICPTCNVTIHNR(+H3)	599.963	62.65	4319417
1_5	1_5_01.raw	sp|Q92974|ARHG2_HUMAN	Q92974	ARHGEF2	EALIC[+57]PTC[+57]NVTIHNR	C74H124N24O24S2[M+3H]	EALICPTCNVTIHNR(+H3)	599.963	62.65	13064462
1_6	1_6_01.raw	sp|Q92974|ARHG2_HUMAN	Q92974	ARHGEF2	EALIC[+57]PTC[+57]NVTIHNR	C74H124N24O24S2[M+3H]	EALICPTCNVTIHNR(+H3)	599.963	62.65	15321906
2_4	2_4_01.raw	sp|Q92974|ARHG2_HUMAN	Q92974	ARHGEF2	EALIC[+57]PTC[+57]NVTIHNR	C74H124N24O24S2[M+3H]	EALICPTCNVTIHNR(+H3)	599.963	62.65	15322433
2_5	2_5_01.raw	sp|Q92974|ARHG2_HUMAN	Q92974	ARHGEF2	EALIC[+57]PTC[+57]NVTIHNR	C74H124N24O24S2[M+3H]	EALICPTCNVTIHNR(+H3)	599.963	62.65	14345802
2_6	2_6_01.raw	sp|Q92974|ARHG2_HUMAN	Q92974	ARHGEF2	EALIC[+57]PTC[+57]NVTIHNR	C74H124N24O24S2[M+3H]	EALICPTCNVTIHNR(+H3)	599.963	62.65	13885957
3_4	3_4_01.raw	sp|Q92974|ARHG2_HUMAN	Q92974	ARHGEF2	EALIC[+57]PTC[+57]NVTIHNR	C74H124N24O24S2[M+3H]	EALICPTCNVTIHNR(+H3)	599.963	62.65	9231130
3_5	3_5_01.raw	sp|Q92974|ARHG2_HUMAN	Q92974	ARHGEF2	EALIC[+57]PTC[+57]NVTIHNR	C74H124N24O24S2[M+3H]	EALICPTCNVTIHNR(+H3)	599.963	62.65	8413300
3_6	3_6_01.raw	sp|Q92974|ARHG2_HUMAN	Q92974	ARHGEF2	EALIC[+57]PTC[+57]NVTIHNR	C74H124N24O24S2[M+3H]	EALICPTCNVTIHNR(+H3)	599.963	62.65	4794402
4_4	4_4_01.raw	sp|Q92974|ARHG2_HUMAN	Q92974	ARHGEF2	EALIC[+57]PTC[+57]NVTIHNR	C74H124N24O24S2[M+3H]	EALICPTCNVTIHNR(+H3)	599.963	62.65	8171382
4_5	4_5_01.raw	sp|Q92974|ARHG2_HUMAN	Q92974	ARHGEF2	EALIC[+57]PTC[+57]NVTIHNR	C74H124N24O24S2[M+3H]	EALICPTCNVTIHNR(+H3)	599.963	62.65	2660042
4_6	4_6_01.raw	sp|Q92974|ARHG2_HUMAN	Q92974	ARHGEF2	EALIC[+57]PTC[+57]NVTIHNR	C74H124N24O24S2[M+3H]	EALICPTCNVTIHNR(+H3)	599.963	62.65	3854592
1_7	1_7_01.raw	sp|Q92974|ARHG2_HUMAN	Q92974	ARHGEF2	EALIC[+57]PTC[+57]NVTIHNR	C74H124N24O24S2[M+3H]	EALICPTCNVTIHNR(+H3)	599.963	62.65	12376472
1_8	1_8_01_171211223541.raw	sp|Q92974|ARHG2_HUMAN	Q92974	ARHGEF2	EALIC[+57]PTC[+57]NVTIHNR	C74H124N24O24S2[M+3H]	EALICPTCNVTIHNR(+H3)	599.963	62.65	5249049
1_9	1_9_01.raw	sp|Q92974|ARHG2_HUMAN	Q92974	ARHGEF2	EALIC[+57]PTC[+57]NVTIHNR	C74H124N24O24S2[M+3H]	EALICPTCNVTIHNR(+H3)	599.963	62.65	16305552
2_7	2_7_01.raw	sp|Q92974|ARHG2_HUMAN	Q92974	ARHGEF2	EALIC[+57]PTC[+57]NVTIHNR	C74H124N24O24S2[M+3H]	EALICPTCNVTIHNR(+H3)	599.963	62.65	4825564
2_8	2_8_01.raw	sp|Q92974|ARHG2_HUMAN	Q92974	ARHGEF2	EALIC[+57]PTC[+57]NVTIHNR	C74H124N24O24S2[M+3H]	EALICPTCNVTIHNR(+H3)	599.963	62.65	10130752
2_9	2_9_01_171217123101.raw	sp|Q92974|ARHG2_HUMAN	Q92974	ARHGEF2	EALIC[+57]PTC[+57]NVTIHNR	C74H124N24O24S2[M+3H]	EALICPTCNVTIHNR(+H3)	599.963	62.65	9227808
3_7	3_7_01.raw	sp|Q92974|ARHG2_HUMAN	Q92974	ARHGEF2	EALIC[+57]PTC[+57]NVTIHNR	C74H124N24O24S2[M+3H]	EALICPTCNVTIHNR(+H3)	599.963	62.65	3087323
3_8	3_8_01.raw	sp|Q92974|ARHG2_HUMAN	Q92974	ARHGEF2	EALIC[+57]PTC[+57]NVTIHNR	C74H124N24O24S2[M+3H]	EALICPTCNVTIHNR(+H3)	599.963	62.65	8073891
3_9	3_9_01.raw	sp|Q92974|ARHG2_HUMAN	Q92974	ARHGEF2	EALIC[+57]PTC[+57]NVTIHNR	C74H124N24O24S2[M+3H]	EALICPTCNVTIHNR(+H3)	599.963	62.65	9930478
4_7	4_7_01.raw	sp|Q92974|ARHG2_HUMAN	Q92974	ARHGEF2	EALIC[+57]PTC[+57]NVTIHNR	C74H124N24O24S2[M+3H]	EALICPTCNVTIHNR(+H3)	599.963	62.65	6129051
4_8	4_8_01.raw	sp|Q92974|ARHG2_HUMAN	Q92974	ARHGEF2	EALIC[+57]PTC[+57]NVTIHNR	C74H124N24O24S2[M+3H]	EALICPTCNVTIHNR(+H3)	599.963	62.65	4705539
4_9	4_9_01.raw	sp|Q92974|ARHG2_HUMAN	Q92974	ARHGEF2	EALIC[+57]PTC[+57]NVTIHNR	C74H124N24O24S2[M+3H]	EALICPTCNVTIHNR(+H3)	599.963	62.65	4366932
1_10	1_10_01.raw	sp|Q92974|ARHG2_HUMAN	Q92974	ARHGEF2	EALIC[+57]PTC[+57]NVTIHNR	C74H124N24O24S2[M+3H]	EALICPTCNVTIHNR(+H3)	599.963	62.65	12237289
1_11	1_11_01.raw	sp|Q92974|ARHG2_HUMAN	Q92974	ARHGEF2	EALIC[+57]PTC[+57]NVTIHNR	C74H124N24O24S2[M+3H]	EALICPTCNVTIHNR(+H3)	599.963	62.65	12052543
1_12	1_12_01.raw	sp|Q92974|ARHG2_HUMAN	Q92974	ARHGEF2	EALIC[+57]PTC[+57]NVTIHNR	C74H124N24O24S2[M+3H]	EALICPTCNVTIHNR(+H3)	599.963	62.65	3789523
2_10	2_10_01.raw	sp|Q92974|ARHG2_HUMAN	Q92974	ARHGEF2	EALIC[+57]PTC[+57]NVTIHNR	C74H124N24O24S2[M+3H]	EALICPTCNVTIHNR(+H3)	599.963	62.65	5745958
2_11	2_11_01_171223040132.raw	sp|Q92974|ARHG2_HUMAN	Q92974	ARHGEF2	EALIC[+57]PTC[+57]NVTIHNR	C74H124N24O24S2[M+3H]	EALICPTCNVTIHNR(+H3)	599.963	62.65	5904696
2_12	2_12_01.raw	sp|Q92974|ARHG2_HUMAN	Q92974	ARHGEF2	EALIC[+57]PTC[+57]NVTIHNR	C74H124N24O24S2[M+3H]	EALICPTCNVTIHNR(+H3)	599.963	62.65	6353074
3_10	3_10_01.raw	sp|Q92974|ARHG2_HUMAN	Q92974	ARHGEF2	EALIC[+57]PTC[+57]NVTIHNR	C74H124N24O24S2[M+3H]	EALICPTCNVTIHNR(+H3)	599.963	62.65	3861607
3_11	3_11_01.raw	sp|Q92974|ARHG2_HUMAN	Q92974	ARHGEF2	EALIC[+57]PTC[+57]NVTIHNR	C74H124N24O24S2[M+3H]	EALICPTCNVTIHNR(+H3)	599.963	62.65	4183510
Chromatograms	FinalList2_2.raw	sp|Q92974|ARHG2_HUMAN	Q92974	ARHGEF2	FLSQLLER	C46H76N12O13[M+2H]	FLSQLLER(+H2)	503.29	84.8	17625748
GPS01	GPS01_2.raw	sp|Q92974|ARHG2_HUMAN	Q92974	ARHGEF2	FLSQLLER	C46H76N12O13[M+2H]	FLSQLLER(+H2)	503.29	84.8	29617114
GPS02	GPS02_2.raw	sp|Q92974|ARHG2_HUMAN	Q92974	ARHGEF2	FLSQLLER	C46H76N12O13[M+2H]	FLSQLLER(+H2)	503.29	84.8	24417992
GPS03	GPS03_2.raw	sp|Q92974|ARHG2_HUMAN	Q92974	ARHGEF2	FLSQLLER	C46H76N12O13[M+2H]	FLSQLLER(+H2)	503.29	84.8	19897670
GPS04	GPS04_2.raw	sp|Q92974|ARHG2_HUMAN	Q92974	ARHGEF2	FLSQLLER	C46H76N12O13[M+2H]	FLSQLLER(+H2)	503.29	84.8	17870204
GPS05	GPS_05_02.raw	sp|Q92974|ARHG2_HUMAN	Q92974	ARHGEF2	FLSQLLER	C46H76N12O13[M+2H]	FLSQLLER(+H2)	503.29	84.8	13710097
GPS06	GPS_06_02.raw	sp|Q92974|ARHG2_HUMAN	Q92974	ARHGEF2	FLSQLLER	C46H76N12O13[M+2H]	FLSQLLER(+H2)	503.29	84.8	11718490
1_1	1_1_02.raw	sp|Q92974|ARHG2_HUMAN	Q92974	ARHGEF2	FLSQLLER	C46H76N12O13[M+2H]	FLSQLLER(+H2)	503.29	84.8	23314238
1_2	1_2_02.raw	sp|Q92974|ARHG2_HUMAN	Q92974	ARHGEF2	FLSQLLER	C46H76N12O13[M+2H]	FLSQLLER(+H2)	503.29	84.8	30898274
1_3	1_3_02.raw	sp|Q92974|ARHG2_HUMAN	Q92974	ARHGEF2	FLSQLLER	C46H76N12O13[M+2H]	FLSQLLER(+H2)	503.29	84.8	21098100
2_1	2_1_02.raw	sp|Q92974|ARHG2_HUMAN	Q92974	ARHGEF2	FLSQLLER	C46H76N12O13[M+2H]	FLSQLLER(+H2)	503.29	84.8	10183974
2_2	2_2_02.raw	sp|Q92974|ARHG2_HUMAN	Q92974	ARHGEF2	FLSQLLER	C46H76N12O13[M+2H]	FLSQLLER(+H2)	503.29	84.8	21148144
2_3	2_3_02.raw	sp|Q92974|ARHG2_HUMAN	Q92974	ARHGEF2	FLSQLLER	C46H76N12O13[M+2H]	FLSQLLER(+H2)	503.29	84.8	28976702
3_1	3_1_02.raw	sp|Q92974|ARHG2_HUMAN	Q92974	ARHGEF2	FLSQLLER	C46H76N12O13[M+2H]	FLSQLLER(+H2)	503.29	84.8	10952294
3_2	3_2_02.raw	sp|Q92974|ARHG2_HUMAN	Q92974	ARHGEF2	FLSQLLER	C46H76N12O13[M+2H]	FLSQLLER(+H2)	503.29	84.8	12783262
3_3	3_3_02.raw	sp|Q92974|ARHG2_HUMAN	Q92974	ARHGEF2	FLSQLLER	C46H76N12O13[M+2H]	FLSQLLER(+H2)	503.29	84.8	16428739
4_1	4_1_02.raw	sp|Q92974|ARHG2_HUMAN	Q92974	ARHGEF2	FLSQLLER	C46H76N12O13[M+2H]	FLSQLLER(+H2)	503.29	84.8	13684041
4_2	4_2_02.raw	sp|Q92974|ARHG2_HUMAN	Q92974	ARHGEF2	FLSQLLER	C46H76N12O13[M+2H]	FLSQLLER(+H2)	503.29	84.8	8426159
4_3	4_3_02.raw	sp|Q92974|ARHG2_HUMAN	Q92974	ARHGEF2	FLSQLLER	C46H76N12O13[M+2H]	FLSQLLER(+H2)	503.29	84.8	10449963
1_4	1_4_02.raw	sp|Q92974|ARHG2_HUMAN	Q92974	ARHGEF2	FLSQLLER	C46H76N12O13[M+2H]	FLSQLLER(+H2)	503.29	84.8	8915960
1_5	1_5_02.raw	sp|Q92974|ARHG2_HUMAN	Q92974	ARHGEF2	FLSQLLER	C46H76N12O13[M+2H]	FLSQLLER(+H2)	503.29	84.8	21905892
1_6	1_6_02.raw	sp|Q92974|ARHG2_HUMAN	Q92974	ARHGEF2	FLSQLLER	C46H76N12O13[M+2H]	FLSQLLER(+H2)	503.29	84.8	27630956
2_4	2_4_02.raw	sp|Q92974|ARHG2_HUMAN	Q92974	ARHGEF2	FLSQLLER	C46H76N12O13[M+2H]	FLSQLLER(+H2)	503.29	84.8	42171628
2_5	2_5_02.raw	sp|Q92974|ARHG2_HUMAN	Q92974	ARHGEF2	FLSQLLER	C46H76N12O13[M+2H]	FLSQLLER(+H2)	503.29	84.8	37910124
2_6	2_6_02.raw	sp|Q92974|ARHG2_HUMAN	Q92974	ARHGEF2	FLSQLLER	C46H76N12O13[M+2H]	FLSQLLER(+H2)	503.29	84.8	41118728
3_4	3_4_02.raw	sp|Q92974|ARHG2_HUMAN	Q92974	ARHGEF2	FLSQLLER	C46H76N12O13[M+2H]	FLSQLLER(+H2)	503.29	84.8	21461444
3_5	3_5_02.raw	sp|Q92974|ARHG2_HUMAN	Q92974	ARHGEF2	FLSQLLER	C46H76N12O13[M+2H]	FLSQLLER(+H2)	503.29	84.8	16911004
3_6	3_6_02.raw	sp|Q92974|ARHG2_HUMAN	Q92974	ARHGEF2	FLSQLLER	C46H76N12O13[M+2H]	FLSQLLER(+H2)	503.29	84.8	12348672
4_4	4_4_02.raw	sp|Q92974|ARHG2_HUMAN	Q92974	ARHGEF2	FLSQLLER	C46H76N12O13[M+2H]	FLSQLLER(+H2)	503.29	84.8	14787215
4_5	4_5_02.raw	sp|Q92974|ARHG2_HUMAN	Q92974	ARHGEF2	FLSQLLER	C46H76N12O13[M+2H]	FLSQLLER(+H2)	503.29	84.8	5068400
4_6	4_6_02.raw	sp|Q92974|ARHG2_HUMAN	Q92974	ARHGEF2	FLSQLLER	C46H76N12O13[M+2H]	FLSQLLER(+H2)	503.29	84.8	7868914
1_7	1_7_02.raw	sp|Q92974|ARHG2_HUMAN	Q92974	ARHGEF2	FLSQLLER	C46H76N12O13[M+2H]	FLSQLLER(+H2)	503.29	84.8	19166754
1_8	1_8_02.raw	sp|Q92974|ARHG2_HUMAN	Q92974	ARHGEF2	FLSQLLER	C46H76N12O13[M+2H]	FLSQLLER(+H2)	503.29	84.8	9099751
1_9	1_9_02.raw	sp|Q92974|ARHG2_HUMAN	Q92974	ARHGEF2	FLSQLLER	C46H76N12O13[M+2H]	FLSQLLER(+H2)	503.29	84.8	33738760
2_7	2_7_02.raw	sp|Q92974|ARHG2_HUMAN	Q92974	ARHGEF2	FLSQLLER	C46H76N12O13[M+2H]	FLSQLLER(+H2)	503.29	84.8	9840030
2_8	2_8_02.raw	sp|Q92974|ARHG2_HUMAN	Q92974	ARHGEF2	FLSQLLER	C46H76N12O13[M+2H]	FLSQLLER(+H2)	503.29	84.8	21567210
2_9	2_9_02_171217160937.raw	sp|Q92974|ARHG2_HUMAN	Q92974	ARHGEF2	FLSQLLER	C46H76N12O13[M+2H]	FLSQLLER(+H2)	503.29	84.8	27639410
3_7	3_7_02.raw	sp|Q92974|ARHG2_HUMAN	Q92974	ARHGEF2	FLSQLLER	C46H76N12O13[M+2H]	FLSQLLER(+H2)	503.29	84.8	6676221
3_8	3_8_02.raw	sp|Q92974|ARHG2_HUMAN	Q92974	ARHGEF2	FLSQLLER	C46H76N12O13[M+2H]	FLSQLLER(+H2)	503.29	84.8	17741270
3_9	3_9_02.raw	sp|Q92974|ARHG2_HUMAN	Q92974	ARHGEF2	FLSQLLER	C46H76N12O13[M+2H]	FLSQLLER(+H2)	503.29	84.8	23362554
4_7	4_7_02.raw	sp|Q92974|ARHG2_HUMAN	Q92974	ARHGEF2	FLSQLLER	C46H76N12O13[M+2H]	FLSQLLER(+H2)	503.29	84.8	12659502
4_8	4_8_02.raw	sp|Q92974|ARHG2_HUMAN	Q92974	ARHGEF2	FLSQLLER	C46H76N12O13[M+2H]	FLSQLLER(+H2)	503.29	84.8	8808896
4_9	4_9_02.raw	sp|Q92974|ARHG2_HUMAN	Q92974	ARHGEF2	FLSQLLER	C46H76N12O13[M+2H]	FLSQLLER(+H2)	503.29	84.8	7286112
1_10	1_10_02.raw	sp|Q92974|ARHG2_HUMAN	Q92974	ARHGEF2	FLSQLLER	C46H76N12O13[M+2H]	FLSQLLER(+H2)	503.29	84.8	21749212
1_11	1_11_02.raw	sp|Q92974|ARHG2_HUMAN	Q92974	ARHGEF2	FLSQLLER	C46H76N12O13[M+2H]	FLSQLLER(+H2)	503.29	84.8	22776114
1_12	1_12_02.raw	sp|Q92974|ARHG2_HUMAN	Q92974	ARHGEF2	FLSQLLER	C46H76N12O13[M+2H]	FLSQLLER(+H2)	503.29	84.8	6457764
2_10	2_10_02.raw	sp|Q92974|ARHG2_HUMAN	Q92974	ARHGEF2	FLSQLLER	C46H76N12O13[M+2H]	FLSQLLER(+H2)	503.29	84.8	13072838
2_11	2_11_02.raw	sp|Q92974|ARHG2_HUMAN	Q92974	ARHGEF2	FLSQLLER	C46H76N12O13[M+2H]	FLSQLLER(+H2)	503.29	84.8	11177066
2_12	2_12_02.raw	sp|Q92974|ARHG2_HUMAN	Q92974	ARHGEF2	FLSQLLER	C46H76N12O13[M+2H]	FLSQLLER(+H2)	503.29	84.8	13772889
3_10	3_10_02.raw	sp|Q92974|ARHG2_HUMAN	Q92974	ARHGEF2	FLSQLLER	C46H76N12O13[M+2H]	FLSQLLER(+H2)	503.29	84.8	5187832
3_11	3_11_02.raw	sp|Q92974|ARHG2_HUMAN	Q92974	ARHGEF2	FLSQLLER	C46H76N12O13[M+2H]	FLSQLLER(+H2)	503.29	84.8	11990482
Chromatograms	FinalList2_1.raw	sp|Q92974|ARHG2_HUMANRhoguaninenucleotideexchangefactor2OS=HomosapiensGN=ARHGEF2PE=1SV=4	Q92974	ARHGEF2	ELLSNVDEGIYQLEK	C77H124N18O28[M+2H]	ELLSNVDEGIYQLEK(+H2)	875.449	96.62	4892142
GPS01	GPS01_1.raw	sp|Q92974|ARHG2_HUMANRhoguaninenucleotideexchangefactor2OS=HomosapiensGN=ARHGEF2PE=1SV=4	Q92974	ARHGEF2	ELLSNVDEGIYQLEK	C77H124N18O28[M+2H]	ELLSNVDEGIYQLEK(+H2)	875.449	96.62	4835901
GPS02	GPS02_1.raw	sp|Q92974|ARHG2_HUMANRhoguaninenucleotideexchangefactor2OS=HomosapiensGN=ARHGEF2PE=1SV=4	Q92974	ARHGEF2	ELLSNVDEGIYQLEK	C77H124N18O28[M+2H]	ELLSNVDEGIYQLEK(+H2)	875.449	96.62	3435474
GPS03	GPS03_1.raw	sp|Q92974|ARHG2_HUMANRhoguaninenucleotideexchangefactor2OS=HomosapiensGN=ARHGEF2PE=1SV=4	Q92974	ARHGEF2	ELLSNVDEGIYQLEK	C77H124N18O28[M+2H]	ELLSNVDEGIYQLEK(+H2)	875.449	96.62	3185151
GPS04	GPS04_1.raw	sp|Q92974|ARHG2_HUMANRhoguaninenucleotideexchangefactor2OS=HomosapiensGN=ARHGEF2PE=1SV=4	Q92974	ARHGEF2	ELLSNVDEGIYQLEK	C77H124N18O28[M+2H]	ELLSNVDEGIYQLEK(+H2)	875.449	96.62	5658330
GPS05	GPS_05_01.raw	sp|Q92974|ARHG2_HUMANRhoguaninenucleotideexchangefactor2OS=HomosapiensGN=ARHGEF2PE=1SV=4	Q92974	ARHGEF2	ELLSNVDEGIYQLEK	C77H124N18O28[M+2H]	ELLSNVDEGIYQLEK(+H2)	875.449	96.62	2931905
GPS06	GPS_06_01.raw	sp|Q92974|ARHG2_HUMANRhoguaninenucleotideexchangefactor2OS=HomosapiensGN=ARHGEF2PE=1SV=4	Q92974	ARHGEF2	ELLSNVDEGIYQLEK	C77H124N18O28[M+2H]	ELLSNVDEGIYQLEK(+H2)	875.449	96.62	2311810
1_1	1_1_01.raw	sp|Q92974|ARHG2_HUMANRhoguaninenucleotideexchangefactor2OS=HomosapiensGN=ARHGEF2PE=1SV=4	Q92974	ARHGEF2	ELLSNVDEGIYQLEK	C77H124N18O28[M+2H]	ELLSNVDEGIYQLEK(+H2)	875.449	96.62	2909863
1_2	1_2_01.raw	sp|Q92974|ARHG2_HUMANRhoguaninenucleotideexchangefactor2OS=HomosapiensGN=ARHGEF2PE=1SV=4	Q92974	ARHGEF2	ELLSNVDEGIYQLEK	C77H124N18O28[M+2H]	ELLSNVDEGIYQLEK(+H2)	875.449	96.62	4255277
1_3	1_3_01.raw	sp|Q92974|ARHG2_HUMANRhoguaninenucleotideexchangefactor2OS=HomosapiensGN=ARHGEF2PE=1SV=4	Q92974	ARHGEF2	ELLSNVDEGIYQLEK	C77H124N18O28[M+2H]	ELLSNVDEGIYQLEK(+H2)	875.449	96.62	5473007
2_1	2_1_01.raw	sp|Q92974|ARHG2_HUMANRhoguaninenucleotideexchangefactor2OS=HomosapiensGN=ARHGEF2PE=1SV=4	Q92974	ARHGEF2	ELLSNVDEGIYQLEK	C77H124N18O28[M+2H]	ELLSNVDEGIYQLEK(+H2)	875.449	96.62	1870193
2_2	2_2_01.raw	sp|Q92974|ARHG2_HUMANRhoguaninenucleotideexchangefactor2OS=HomosapiensGN=ARHGEF2PE=1SV=4	Q92974	ARHGEF2	ELLSNVDEGIYQLEK	C77H124N18O28[M+2H]	ELLSNVDEGIYQLEK(+H2)	875.449	96.62	4635281
2_3	2_3_01.raw	sp|Q92974|ARHG2_HUMANRhoguaninenucleotideexchangefactor2OS=HomosapiensGN=ARHGEF2PE=1SV=4	Q92974	ARHGEF2	ELLSNVDEGIYQLEK	C77H124N18O28[M+2H]	ELLSNVDEGIYQLEK(+H2)	875.449	96.62	6250212
3_1	3_1_01.raw	sp|Q92974|ARHG2_HUMANRhoguaninenucleotideexchangefactor2OS=HomosapiensGN=ARHGEF2PE=1SV=4	Q92974	ARHGEF2	ELLSNVDEGIYQLEK	C77H124N18O28[M+2H]	ELLSNVDEGIYQLEK(+H2)	875.449	96.62	1970451
3_2	3_2_01_171223210221.raw	sp|Q92974|ARHG2_HUMANRhoguaninenucleotideexchangefactor2OS=HomosapiensGN=ARHGEF2PE=1SV=4	Q92974	ARHGEF2	ELLSNVDEGIYQLEK	C77H124N18O28[M+2H]	ELLSNVDEGIYQLEK(+H2)	875.449	96.62	1641949
3_3	3_3_01.raw	sp|Q92974|ARHG2_HUMANRhoguaninenucleotideexchangefactor2OS=HomosapiensGN=ARHGEF2PE=1SV=4	Q92974	ARHGEF2	ELLSNVDEGIYQLEK	C77H124N18O28[M+2H]	ELLSNVDEGIYQLEK(+H2)	875.449	96.62	1949759
4_1	4_1_01.raw	sp|Q92974|ARHG2_HUMANRhoguaninenucleotideexchangefactor2OS=HomosapiensGN=ARHGEF2PE=1SV=4	Q92974	ARHGEF2	ELLSNVDEGIYQLEK	C77H124N18O28[M+2H]	ELLSNVDEGIYQLEK(+H2)	875.449	96.62	359564
4_2	4_2_01.raw	sp|Q92974|ARHG2_HUMANRhoguaninenucleotideexchangefactor2OS=HomosapiensGN=ARHGEF2PE=1SV=4	Q92974	ARHGEF2	ELLSNVDEGIYQLEK	C77H124N18O28[M+2H]	ELLSNVDEGIYQLEK(+H2)	875.449	96.62	1480102
4_3	4_3_01.raw	sp|Q92974|ARHG2_HUMANRhoguaninenucleotideexchangefactor2OS=HomosapiensGN=ARHGEF2PE=1SV=4	Q92974	ARHGEF2	ELLSNVDEGIYQLEK	C77H124N18O28[M+2H]	ELLSNVDEGIYQLEK(+H2)	875.449	96.62	2158722
1_4	1_4_01.raw	sp|Q92974|ARHG2_HUMANRhoguaninenucleotideexchangefactor2OS=HomosapiensGN=ARHGEF2PE=1SV=4	Q92974	ARHGEF2	ELLSNVDEGIYQLEK	C77H124N18O28[M+2H]	ELLSNVDEGIYQLEK(+H2)	875.449	96.62	1755639
1_5	1_5_01.raw	sp|Q92974|ARHG2_HUMANRhoguaninenucleotideexchangefactor2OS=HomosapiensGN=ARHGEF2PE=1SV=4	Q92974	ARHGEF2	ELLSNVDEGIYQLEK	C77H124N18O28[M+2H]	ELLSNVDEGIYQLEK(+H2)	875.449	96.62	3751548
1_6	1_6_01.raw	sp|Q92974|ARHG2_HUMANRhoguaninenucleotideexchangefactor2OS=HomosapiensGN=ARHGEF2PE=1SV=4	Q92974	ARHGEF2	ELLSNVDEGIYQLEK	C77H124N18O28[M+2H]	ELLSNVDEGIYQLEK(+H2)	875.449	96.62	4798274
2_4	2_4_01.raw	sp|Q92974|ARHG2_HUMANRhoguaninenucleotideexchangefactor2OS=HomosapiensGN=ARHGEF2PE=1SV=4	Q92974	ARHGEF2	ELLSNVDEGIYQLEK	C77H124N18O28[M+2H]	ELLSNVDEGIYQLEK(+H2)	875.449	96.62	7094269
2_5	2_5_01.raw	sp|Q92974|ARHG2_HUMANRhoguaninenucleotideexchangefactor2OS=HomosapiensGN=ARHGEF2PE=1SV=4	Q92974	ARHGEF2	ELLSNVDEGIYQLEK	C77H124N18O28[M+2H]	ELLSNVDEGIYQLEK(+H2)	875.449	96.62	7952816
2_6	2_6_01.raw	sp|Q92974|ARHG2_HUMANRhoguaninenucleotideexchangefactor2OS=HomosapiensGN=ARHGEF2PE=1SV=4	Q92974	ARHGEF2	ELLSNVDEGIYQLEK	C77H124N18O28[M+2H]	ELLSNVDEGIYQLEK(+H2)	875.449	96.62	8764306
3_4	3_4_01.raw	sp|Q92974|ARHG2_HUMANRhoguaninenucleotideexchangefactor2OS=HomosapiensGN=ARHGEF2PE=1SV=4	Q92974	ARHGEF2	ELLSNVDEGIYQLEK	C77H124N18O28[M+2H]	ELLSNVDEGIYQLEK(+H2)	875.449	96.62	3221274
3_5	3_5_01.raw	sp|Q92974|ARHG2_HUMANRhoguaninenucleotideexchangefactor2OS=HomosapiensGN=ARHGEF2PE=1SV=4	Q92974	ARHGEF2	ELLSNVDEGIYQLEK	C77H124N18O28[M+2H]	ELLSNVDEGIYQLEK(+H2)	875.449	96.62	2343520
3_6	3_6_01.raw	sp|Q92974|ARHG2_HUMANRhoguaninenucleotideexchangefactor2OS=HomosapiensGN=ARHGEF2PE=1SV=4	Q92974	ARHGEF2	ELLSNVDEGIYQLEK	C77H124N18O28[M+2H]	ELLSNVDEGIYQLEK(+H2)	875.449	96.62	1624093
4_4	4_4_01.raw	sp|Q92974|ARHG2_HUMANRhoguaninenucleotideexchangefactor2OS=HomosapiensGN=ARHGEF2PE=1SV=4	Q92974	ARHGEF2	ELLSNVDEGIYQLEK	C77H124N18O28[M+2H]	ELLSNVDEGIYQLEK(+H2)	875.449	96.62	3381655
4_5	4_5_01.raw	sp|Q92974|ARHG2_HUMANRhoguaninenucleotideexchangefactor2OS=HomosapiensGN=ARHGEF2PE=1SV=4	Q92974	ARHGEF2	ELLSNVDEGIYQLEK	C77H124N18O28[M+2H]	ELLSNVDEGIYQLEK(+H2)	875.449	96.62	1883428
4_6	4_6_01.raw	sp|Q92974|ARHG2_HUMANRhoguaninenucleotideexchangefactor2OS=HomosapiensGN=ARHGEF2PE=1SV=4	Q92974	ARHGEF2	ELLSNVDEGIYQLEK	C77H124N18O28[M+2H]	ELLSNVDEGIYQLEK(+H2)	875.449	96.62	1921010
1_7	1_7_01.raw	sp|Q92974|ARHG2_HUMANRhoguaninenucleotideexchangefactor2OS=HomosapiensGN=ARHGEF2PE=1SV=4	Q92974	ARHGEF2	ELLSNVDEGIYQLEK	C77H124N18O28[M+2H]	ELLSNVDEGIYQLEK(+H2)	875.449	96.62	3570918
1_8	1_8_01_171211223541.raw	sp|Q92974|ARHG2_HUMANRhoguaninenucleotideexchangefactor2OS=HomosapiensGN=ARHGEF2PE=1SV=4	Q92974	ARHGEF2	ELLSNVDEGIYQLEK	C77H124N18O28[M+2H]	ELLSNVDEGIYQLEK(+H2)	875.449	96.62	2135910
1_9	1_9_01.raw	sp|Q92974|ARHG2_HUMANRhoguaninenucleotideexchangefactor2OS=HomosapiensGN=ARHGEF2PE=1SV=4	Q92974	ARHGEF2	ELLSNVDEGIYQLEK	C77H124N18O28[M+2H]	ELLSNVDEGIYQLEK(+H2)	875.449	96.62	6305576
2_7	2_7_01.raw	sp|Q92974|ARHG2_HUMANRhoguaninenucleotideexchangefactor2OS=HomosapiensGN=ARHGEF2PE=1SV=4	Q92974	ARHGEF2	ELLSNVDEGIYQLEK	C77H124N18O28[M+2H]	ELLSNVDEGIYQLEK(+H2)	875.449	96.62	2775875
2_8	2_8_01.raw	sp|Q92974|ARHG2_HUMANRhoguaninenucleotideexchangefactor2OS=HomosapiensGN=ARHGEF2PE=1SV=4	Q92974	ARHGEF2	ELLSNVDEGIYQLEK	C77H124N18O28[M+2H]	ELLSNVDEGIYQLEK(+H2)	875.449	96.62	5424704
2_9	2_9_01_171217123101.raw	sp|Q92974|ARHG2_HUMANRhoguaninenucleotideexchangefactor2OS=HomosapiensGN=ARHGEF2PE=1SV=4	Q92974	ARHGEF2	ELLSNVDEGIYQLEK	C77H124N18O28[M+2H]	ELLSNVDEGIYQLEK(+H2)	875.449	96.62	4030008
3_7	3_7_01.raw	sp|Q92974|ARHG2_HUMANRhoguaninenucleotideexchangefactor2OS=HomosapiensGN=ARHGEF2PE=1SV=4	Q92974	ARHGEF2	ELLSNVDEGIYQLEK	C77H124N18O28[M+2H]	ELLSNVDEGIYQLEK(+H2)	875.449	96.62	991750
3_8	3_8_01.raw	sp|Q92974|ARHG2_HUMANRhoguaninenucleotideexchangefactor2OS=HomosapiensGN=ARHGEF2PE=1SV=4	Q92974	ARHGEF2	ELLSNVDEGIYQLEK	C77H124N18O28[M+2H]	ELLSNVDEGIYQLEK(+H2)	875.449	96.62	2518284
3_9	3_9_01.raw	sp|Q92974|ARHG2_HUMANRhoguaninenucleotideexchangefactor2OS=HomosapiensGN=ARHGEF2PE=1SV=4	Q92974	ARHGEF2	ELLSNVDEGIYQLEK	C77H124N18O28[M+2H]	ELLSNVDEGIYQLEK(+H2)	875.449	96.62	3057690
4_7	4_7_01.raw	sp|Q92974|ARHG2_HUMANRhoguaninenucleotideexchangefactor2OS=HomosapiensGN=ARHGEF2PE=1SV=4	Q92974	ARHGEF2	ELLSNVDEGIYQLEK	C77H124N18O28[M+2H]	ELLSNVDEGIYQLEK(+H2)	875.449	96.62	2042985
4_8	4_8_01.raw	sp|Q92974|ARHG2_HUMANRhoguaninenucleotideexchangefactor2OS=HomosapiensGN=ARHGEF2PE=1SV=4	Q92974	ARHGEF2	ELLSNVDEGIYQLEK	C77H124N18O28[M+2H]	ELLSNVDEGIYQLEK(+H2)	875.449	96.62	1507414
4_9	4_9_01.raw	sp|Q92974|ARHG2_HUMANRhoguaninenucleotideexchangefactor2OS=HomosapiensGN=ARHGEF2PE=1SV=4	Q92974	ARHGEF2	ELLSNVDEGIYQLEK	C77H124N18O28[M+2H]	ELLSNVDEGIYQLEK(+H2)	875.449	96.62	1337960
1_10	1_10_01.raw	sp|Q92974|ARHG2_HUMANRhoguaninenucleotideexchangefactor2OS=HomosapiensGN=ARHGEF2PE=1SV=4	Q92974	ARHGEF2	ELLSNVDEGIYQLEK	C77H124N18O28[M+2H]	ELLSNVDEGIYQLEK(+H2)	875.449	96.62	4870976
1_11	1_11_01.raw	sp|Q92974|ARHG2_HUMANRhoguaninenucleotideexchangefactor2OS=HomosapiensGN=ARHGEF2PE=1SV=4	Q92974	ARHGEF2	ELLSNVDEGIYQLEK	C77H124N18O28[M+2H]	ELLSNVDEGIYQLEK(+H2)	875.449	96.62	3608983
1_12	1_12_01.raw	sp|Q92974|ARHG2_HUMANRhoguaninenucleotideexchangefactor2OS=HomosapiensGN=ARHGEF2PE=1SV=4	Q92974	ARHGEF2	ELLSNVDEGIYQLEK	C77H124N18O28[M+2H]	ELLSNVDEGIYQLEK(+H2)	875.449	96.62	1758575
2_10	2_10_01.raw	sp|Q92974|ARHG2_HUMANRhoguaninenucleotideexchangefactor2OS=HomosapiensGN=ARHGEF2PE=1SV=4	Q92974	ARHGEF2	ELLSNVDEGIYQLEK	C77H124N18O28[M+2H]	ELLSNVDEGIYQLEK(+H2)	875.449	96.62	2989499
2_11	2_11_01_171223040132.raw	sp|Q92974|ARHG2_HUMANRhoguaninenucleotideexchangefactor2OS=HomosapiensGN=ARHGEF2PE=1SV=4	Q92974	ARHGEF2	ELLSNVDEGIYQLEK	C77H124N18O28[M+2H]	ELLSNVDEGIYQLEK(+H2)	875.449	96.62	2537428
2_12	2_12_01.raw	sp|Q92974|ARHG2_HUMANRhoguaninenucleotideexchangefactor2OS=HomosapiensGN=ARHGEF2PE=1SV=4	Q92974	ARHGEF2	ELLSNVDEGIYQLEK	C77H124N18O28[M+2H]	ELLSNVDEGIYQLEK(+H2)	875.449	96.62	4367350
3_10	3_10_01.raw	sp|Q92974|ARHG2_HUMANRhoguaninenucleotideexchangefactor2OS=HomosapiensGN=ARHGEF2PE=1SV=4	Q92974	ARHGEF2	ELLSNVDEGIYQLEK	C77H124N18O28[M+2H]	ELLSNVDEGIYQLEK(+H2)	875.449	96.62	1238646
3_11	3_11_01.raw	sp|Q92974|ARHG2_HUMANRhoguaninenucleotideexchangefactor2OS=HomosapiensGN=ARHGEF2PE=1SV=4	Q92974	ARHGEF2	ELLSNVDEGIYQLEK	C77H124N18O28[M+2H]	ELLSNVDEGIYQLEK(+H2)	875.449	96.62	1632764
Chromatograms	FinalList2_1.raw	sp|Q66PJ3|AR6P4_HUMAN	Q66PJ3	ARL6IP4	SAGEEEDGPVLTDEQK	C69H110N18O32[M+2H]	SAGEEEDGPVLTDEQK(+H2)	852.384	51.33	203241
GPS01	GPS01_1.raw	sp|Q66PJ3|AR6P4_HUMAN	Q66PJ3	ARL6IP4	SAGEEEDGPVLTDEQK	C69H110N18O32[M+2H]	SAGEEEDGPVLTDEQK(+H2)	852.384	51.33	3075010
GPS02	GPS02_1.raw	sp|Q66PJ3|AR6P4_HUMAN	Q66PJ3	ARL6IP4	SAGEEEDGPVLTDEQK	C69H110N18O32[M+2H]	SAGEEEDGPVLTDEQK(+H2)	852.384	51.33	2730834
GPS03	GPS03_1.raw	sp|Q66PJ3|AR6P4_HUMAN	Q66PJ3	ARL6IP4	SAGEEEDGPVLTDEQK	C69H110N18O32[M+2H]	SAGEEEDGPVLTDEQK(+H2)	852.384	51.33	245028
GPS04	GPS04_1.raw	sp|Q66PJ3|AR6P4_HUMAN	Q66PJ3	ARL6IP4	SAGEEEDGPVLTDEQK	C69H110N18O32[M+2H]	SAGEEEDGPVLTDEQK(+H2)	852.384	51.33	243111
GPS05	GPS_05_01.raw	sp|Q66PJ3|AR6P4_HUMAN	Q66PJ3	ARL6IP4	SAGEEEDGPVLTDEQK	C69H110N18O32[M+2H]	SAGEEEDGPVLTDEQK(+H2)	852.384	51.33	1114072
GPS06	GPS_06_01.raw	sp|Q66PJ3|AR6P4_HUMAN	Q66PJ3	ARL6IP4	SAGEEEDGPVLTDEQK	C69H110N18O32[M+2H]	SAGEEEDGPVLTDEQK(+H2)	852.384	51.33	997496
1_1	1_1_01.raw	sp|Q66PJ3|AR6P4_HUMAN	Q66PJ3	ARL6IP4	SAGEEEDGPVLTDEQK	C69H110N18O32[M+2H]	SAGEEEDGPVLTDEQK(+H2)	852.384	51.33	1826815
1_2	1_2_01.raw	sp|Q66PJ3|AR6P4_HUMAN	Q66PJ3	ARL6IP4	SAGEEEDGPVLTDEQK	C69H110N18O32[M+2H]	SAGEEEDGPVLTDEQK(+H2)	852.384	51.33	3831843
[truncated: 45,384 more rows]

## Sheet: Table S6
Table S6. Normalized peptide peak areas
Replicate Name	File Name	Protein Name	Protein Accession	Protein Gene	Peptide Modified Sequence	Precursor Ion Formula	Precursor Ion Name	Precursor Mz	Average Measured Retention Time	Corrected Area
Chromatograms	FinalList2_1.raw	sp|P49588|SYAC_HUMAN	P49588	AARS	LVSVLQNK	C40H73N11O12[M+2H]	LVSVLQNK(+H2)	450.779	57.05
GPS01	GPS01_2.raw	sp|P49588|SYAC_HUMAN	P49588	AARS	LVSVLQNK	C40H73N11O12[M+2H]	LVSVLQNK(+H2)	450.779	57.05	1.28014e+07
GPS02	GPS02_2.raw	sp|P49588|SYAC_HUMAN	P49588	AARS	LVSVLQNK	C40H73N11O12[M+2H]	LVSVLQNK(+H2)	450.779	57.05	9.02512e+06
GPS03	GPS03_2.raw	sp|P49588|SYAC_HUMAN	P49588	AARS	LVSVLQNK	C40H73N11O12[M+2H]	LVSVLQNK(+H2)	450.779	57.05	1.47644e+07
GPS04	GPS04_2.raw	sp|P49588|SYAC_HUMAN	P49588	AARS	LVSVLQNK	C40H73N11O12[M+2H]	LVSVLQNK(+H2)	450.779	57.05	1.23679e+07
GPS05	GPS_05_02.raw	sp|P49588|SYAC_HUMAN	P49588	AARS	LVSVLQNK	C40H73N11O12[M+2H]	LVSVLQNK(+H2)	450.779	57.05	1.505e+07
GPS06	GPS_06_02.raw	sp|P49588|SYAC_HUMAN	P49588	AARS	LVSVLQNK	C40H73N11O12[M+2H]	LVSVLQNK(+H2)	450.779	57.05	1.11864e+07
1_1	1_1_02.raw	sp|P49588|SYAC_HUMAN	P49588	AARS	LVSVLQNK	C40H73N11O12[M+2H]	LVSVLQNK(+H2)	450.779	57.05	1.49983e+07
1_2	1_2_02.raw	sp|P49588|SYAC_HUMAN	P49588	AARS	LVSVLQNK	C40H73N11O12[M+2H]	LVSVLQNK(+H2)	450.779	57.05	1.64686e+07
1_3	1_3_02.raw	sp|P49588|SYAC_HUMAN	P49588	AARS	LVSVLQNK	C40H73N11O12[M+2H]	LVSVLQNK(+H2)	450.779	57.05	1.57013e+07
2_1	2_1_02.raw	sp|P49588|SYAC_HUMAN	P49588	AARS	LVSVLQNK	C40H73N11O12[M+2H]	LVSVLQNK(+H2)	450.779	57.05	7.68244e+06
2_2	2_2_02.raw	sp|P49588|SYAC_HUMAN	P49588	AARS	LVSVLQNK	C40H73N11O12[M+2H]	LVSVLQNK(+H2)	450.779	57.05	1.0588e+07
2_3	2_3_02.raw	sp|P49588|SYAC_HUMAN	P49588	AARS	LVSVLQNK	C40H73N11O12[M+2H]	LVSVLQNK(+H2)	450.779	57.05	1.83772e+07
3_1	3_1_02.raw	sp|P49588|SYAC_HUMAN	P49588	AARS	LVSVLQNK	C40H73N11O12[M+2H]	LVSVLQNK(+H2)	450.779	57.05	6.48352e+06
3_2	3_2_02.raw	sp|P49588|SYAC_HUMAN	P49588	AARS	LVSVLQNK	C40H73N11O12[M+2H]	LVSVLQNK(+H2)	450.779	57.05	1.28532e+07
3_3	3_3_02.raw	sp|P49588|SYAC_HUMAN	P49588	AARS	LVSVLQNK	C40H73N11O12[M+2H]	LVSVLQNK(+H2)	450.779	57.05	1.58395e+07
4_1	4_1_02.raw	sp|P49588|SYAC_HUMAN	P49588	AARS	LVSVLQNK	C40H73N11O12[M+2H]	LVSVLQNK(+H2)	450.779	57.05	1.41654e+07
4_2	4_2_02.raw	sp|P49588|SYAC_HUMAN	P49588	AARS	LVSVLQNK	C40H73N11O12[M+2H]	LVSVLQNK(+H2)	450.779	57.05	1.18537e+07
4_3	4_3_02.raw	sp|P49588|SYAC_HUMAN	P49588	AARS	LVSVLQNK	C40H73N11O12[M+2H]	LVSVLQNK(+H2)	450.779	57.05	9.99903e+06
1_4	1_4_02.raw	sp|P49588|SYAC_HUMAN	P49588	AARS	LVSVLQNK	C40H73N11O12[M+2H]	LVSVLQNK(+H2)	450.779	57.05	3.08815e+06
1_5	1_5_02.raw	sp|P49588|SYAC_HUMAN	P49588	AARS	LVSVLQNK	C40H73N11O12[M+2H]	LVSVLQNK(+H2)	450.779	57.05	1.95451e+07
1_6	1_6_02.raw	sp|P49588|SYAC_HUMAN	P49588	AARS	LVSVLQNK	C40H73N11O12[M+2H]	LVSVLQNK(+H2)	450.779	57.05	2.45608e+07
2_4	2_4_02.raw	sp|P49588|SYAC_HUMAN	P49588	AARS	LVSVLQNK	C40H73N11O12[M+2H]	LVSVLQNK(+H2)	450.779	57.05	2.68336e+07
2_5	2_5_02.raw	sp|P49588|SYAC_HUMAN	P49588	AARS	LVSVLQNK	C40H73N11O12[M+2H]	LVSVLQNK(+H2)	450.779	57.05	3.48241e+07
2_6	2_6_02.raw	sp|P49588|SYAC_HUMAN	P49588	AARS	LVSVLQNK	C40H73N11O12[M+2H]	LVSVLQNK(+H2)	450.779	57.05	3.07924e+07
3_4	3_4_02.raw	sp|P49588|SYAC_HUMAN	P49588	AARS	LVSVLQNK	C40H73N11O12[M+2H]	LVSVLQNK(+H2)	450.779	57.05	1.81087e+07
3_5	3_5_02.raw	sp|P49588|SYAC_HUMAN	P49588	AARS	LVSVLQNK	C40H73N11O12[M+2H]	LVSVLQNK(+H2)	450.779	57.05	1.75797e+07
3_6	3_6_02.raw	sp|P49588|SYAC_HUMAN	P49588	AARS	LVSVLQNK	C40H73N11O12[M+2H]	LVSVLQNK(+H2)	450.779	57.05	7.91409e+06
4_4	4_4_02.raw	sp|P49588|SYAC_HUMAN	P49588	AARS	LVSVLQNK	C40H73N11O12[M+2H]	LVSVLQNK(+H2)	450.779	57.05	2.21424e+07
4_5	4_5_02.raw	sp|P49588|SYAC_HUMAN	P49588	AARS	LVSVLQNK	C40H73N11O12[M+2H]	LVSVLQNK(+H2)	450.779	57.05	6.85307e+06
4_6	4_6_02.raw	sp|P49588|SYAC_HUMAN	P49588	AARS	LVSVLQNK	C40H73N11O12[M+2H]	LVSVLQNK(+H2)	450.779	57.05	1.39501e+07
1_7	1_7_02.raw	sp|P49588|SYAC_HUMAN	P49588	AARS	LVSVLQNK	C40H73N11O12[M+2H]	LVSVLQNK(+H2)	450.779	57.05	6.38925e+06
1_8	1_8_02.raw	sp|P49588|SYAC_HUMAN	P49588	AARS	LVSVLQNK	C40H73N11O12[M+2H]	LVSVLQNK(+H2)	450.779	57.05	4.24297e+06
1_9	1_9_02.raw	sp|P49588|SYAC_HUMAN	P49588	AARS	LVSVLQNK	C40H73N11O12[M+2H]	LVSVLQNK(+H2)	450.779	57.05	1.59204e+07
2_7	2_7_02.raw	sp|P49588|SYAC_HUMAN	P49588	AARS	LVSVLQNK	C40H73N11O12[M+2H]	LVSVLQNK(+H2)	450.779	57.05	5.7845e+06
2_8	2_8_02.raw	sp|P49588|SYAC_HUMAN	P49588	AARS	LVSVLQNK	C40H73N11O12[M+2H]	LVSVLQNK(+H2)	450.779	57.05	2.2538e+07
2_9	2_9_02_171217160937.raw	sp|P49588|SYAC_HUMAN	P49588	AARS	LVSVLQNK	C40H73N11O12[M+2H]	LVSVLQNK(+H2)	450.779	57.05	2.82699e+07
3_7	3_7_02.raw	sp|P49588|SYAC_HUMAN	P49588	AARS	LVSVLQNK	C40H73N11O12[M+2H]	LVSVLQNK(+H2)	450.779	57.05	4.12493e+06
3_8	3_8_02.raw	sp|P49588|SYAC_HUMAN	P49588	AARS	LVSVLQNK	C40H73N11O12[M+2H]	LVSVLQNK(+H2)	450.779	57.05	2.06556e+07
3_9	3_9_02.raw	sp|P49588|SYAC_HUMAN	P49588	AARS	LVSVLQNK	C40H73N11O12[M+2H]	LVSVLQNK(+H2)	450.779	57.05	2.26098e+07
4_7	4_7_02.raw	sp|P49588|SYAC_HUMAN	P49588	AARS	LVSVLQNK	C40H73N11O12[M+2H]	LVSVLQNK(+H2)	450.779	57.05	2.35445e+07
4_8	4_8_02.raw	sp|P49588|SYAC_HUMAN	P49588	AARS	LVSVLQNK	C40H73N11O12[M+2H]	LVSVLQNK(+H2)	450.779	57.05	25999.7
4_9	4_9_02.raw	sp|P49588|SYAC_HUMAN	P49588	AARS	LVSVLQNK	C40H73N11O12[M+2H]	LVSVLQNK(+H2)	450.779	57.05	1.1014e+07
1_10	1_10_02.raw	sp|P49588|SYAC_HUMAN	P49588	AARS	LVSVLQNK	C40H73N11O12[M+2H]	LVSVLQNK(+H2)	450.779	57.05	1.59911e+07
1_11	1_11_02.raw	sp|P49588|SYAC_HUMAN	P49588	AARS	LVSVLQNK	C40H73N11O12[M+2H]	LVSVLQNK(+H2)	450.779	57.05	2.23642e+07
1_12	1_12_02.raw	sp|P49588|SYAC_HUMAN	P49588	AARS	LVSVLQNK	C40H73N11O12[M+2H]	LVSVLQNK(+H2)	450.779	57.05	5.04072e+06
2_10	2_10_02.raw	sp|P49588|SYAC_HUMAN	P49588	AARS	LVSVLQNK	C40H73N11O12[M+2H]	LVSVLQNK(+H2)	450.779	57.05	8.09108e+06
2_11	2_11_02.raw	sp|P49588|SYAC_HUMAN	P49588	AARS	LVSVLQNK	C40H73N11O12[M+2H]	LVSVLQNK(+H2)	450.779	57.05	1.09619e+07
2_12	2_12_02.raw	sp|P49588|SYAC_HUMAN	P49588	AARS	LVSVLQNK	C40H73N11O12[M+2H]	LVSVLQNK(+H2)	450.779	57.05	8.42597e+06
3_10	3_10_02.raw	sp|P49588|SYAC_HUMAN	P49588	AARS	LVSVLQNK	C40H73N11O12[M+2H]	LVSVLQNK(+H2)	450.779	57.05	5.09486e+06
3_11	3_11_02.raw	sp|P49588|SYAC_HUMAN	P49588	AARS	LVSVLQNK	C40H73N11O12[M+2H]	LVSVLQNK(+H2)	450.779	57.05	1.14501e+07
Chromatograms	FinalList2_2.raw	sp|P49588|SYAC_HUMAN	P49588	AARS	IVAVTGAEAQK	C47H83N13O16[M+2H]	IVAVTGAEAQK(+H2)	543.811	46.26
GPS01	GPS01_1.raw	sp|P49588|SYAC_HUMAN	P49588	AARS	IVAVTGAEAQK	C47H83N13O16[M+2H]	IVAVTGAEAQK(+H2)	543.811	46.26	2.28091e+07
GPS02	GPS02_1.raw	sp|P49588|SYAC_HUMAN	P49588	AARS	IVAVTGAEAQK	C47H83N13O16[M+2H]	IVAVTGAEAQK(+H2)	543.811	46.26	2.43208e+07
GPS03	GPS03_1.raw	sp|P49588|SYAC_HUMAN	P49588	AARS	IVAVTGAEAQK	C47H83N13O16[M+2H]	IVAVTGAEAQK(+H2)	543.811	46.26	2.01491e+07
GPS04	GPS04_1.raw	sp|P49588|SYAC_HUMAN	P49588	AARS	IVAVTGAEAQK	C47H83N13O16[M+2H]	IVAVTGAEAQK(+H2)	543.811	46.26	1.93169e+07
GPS05	GPS_05_01.raw	sp|P49588|SYAC_HUMAN	P49588	AARS	IVAVTGAEAQK	C47H83N13O16[M+2H]	IVAVTGAEAQK(+H2)	543.811	46.26	1.43685e+07
GPS06	GPS_06_01.raw	sp|P49588|SYAC_HUMAN	P49588	AARS	IVAVTGAEAQK	C47H83N13O16[M+2H]	IVAVTGAEAQK(+H2)	543.811	46.26	1.28326e+07
1_1	1_1_01.raw	sp|P49588|SYAC_HUMAN	P49588	AARS	IVAVTGAEAQK	C47H83N13O16[M+2H]	IVAVTGAEAQK(+H2)	543.811	46.26	2.88405e+07
1_2	1_2_01.raw	sp|P49588|SYAC_HUMAN	P49588	AARS	IVAVTGAEAQK	C47H83N13O16[M+2H]	IVAVTGAEAQK(+H2)	543.811	46.26	2.54941e+07
1_3	1_3_01.raw	sp|P49588|SYAC_HUMAN	P49588	AARS	IVAVTGAEAQK	C47H83N13O16[M+2H]	IVAVTGAEAQK(+H2)	543.811	46.26	2.34436e+07
2_1	2_1_01.raw	sp|P49588|SYAC_HUMAN	P49588	AARS	IVAVTGAEAQK	C47H83N13O16[M+2H]	IVAVTGAEAQK(+H2)	543.811	46.26	1.2054e+07
2_2	2_2_01.raw	sp|P49588|SYAC_HUMAN	P49588	AARS	IVAVTGAEAQK	C47H83N13O16[M+2H]	IVAVTGAEAQK(+H2)	543.811	46.26	1.70868e+07
2_3	2_3_01.raw	sp|P49588|SYAC_HUMAN	P49588	AARS	IVAVTGAEAQK	C47H83N13O16[M+2H]	IVAVTGAEAQK(+H2)	543.811	46.26	2.58937e+07
3_1	3_1_01.raw	sp|P49588|SYAC_HUMAN	P49588	AARS	IVAVTGAEAQK	C47H83N13O16[M+2H]	IVAVTGAEAQK(+H2)	543.811	46.26	1.01945e+07
3_2	3_2_01_171223210221.raw	sp|P49588|SYAC_HUMAN	P49588	AARS	IVAVTGAEAQK	C47H83N13O16[M+2H]	IVAVTGAEAQK(+H2)	543.811	46.26	2.11958e+07
3_3	3_3_01.raw	sp|P49588|SYAC_HUMAN	P49588	AARS	IVAVTGAEAQK	C47H83N13O16[M+2H]	IVAVTGAEAQK(+H2)	543.811	46.26	2.76852e+07
4_1	4_1_01.raw	sp|P49588|SYAC_HUMAN	P49588	AARS	IVAVTGAEAQK	C47H83N13O16[M+2H]	IVAVTGAEAQK(+H2)	543.811	46.26	5.05954e+06
4_2	4_2_01.raw	sp|P49588|SYAC_HUMAN	P49588	AARS	IVAVTGAEAQK	C47H83N13O16[M+2H]	IVAVTGAEAQK(+H2)	543.811	46.26	9.99172e+06
4_3	4_3_01.raw	sp|P49588|SYAC_HUMAN	P49588	AARS	IVAVTGAEAQK	C47H83N13O16[M+2H]	IVAVTGAEAQK(+H2)	543.811	46.26	1.18145e+07
1_4	1_4_01.raw	sp|P49588|SYAC_HUMAN	P49588	AARS	IVAVTGAEAQK	C47H83N13O16[M+2H]	IVAVTGAEAQK(+H2)	543.811	46.26	5.33308e+06
1_5	1_5_01.raw	sp|P49588|SYAC_HUMAN	P49588	AARS	IVAVTGAEAQK	C47H83N13O16[M+2H]	IVAVTGAEAQK(+H2)	543.811	46.26	2.8656e+07
1_6	1_6_01.raw	sp|P49588|SYAC_HUMAN	P49588	AARS	IVAVTGAEAQK	C47H83N13O16[M+2H]	IVAVTGAEAQK(+H2)	543.811	46.26	4.25555e+07
2_4	2_4_01.raw	sp|P49588|SYAC_HUMAN	P49588	AARS	IVAVTGAEAQK	C47H83N13O16[M+2H]	IVAVTGAEAQK(+H2)	543.811	46.26	3.67574e+07
2_5	2_5_01.raw	sp|P49588|SYAC_HUMAN	P49588	AARS	IVAVTGAEAQK	C47H83N13O16[M+2H]	IVAVTGAEAQK(+H2)	543.811	46.26	4.69683e+07
2_6	2_6_01.raw	sp|P49588|SYAC_HUMAN	P49588	AARS	IVAVTGAEAQK	C47H83N13O16[M+2H]	IVAVTGAEAQK(+H2)	543.811	46.26	4.54385e+07
3_4	3_4_01.raw	sp|P49588|SYAC_HUMAN	P49588	AARS	IVAVTGAEAQK	C47H83N13O16[M+2H]	IVAVTGAEAQK(+H2)	543.811	46.26	2.90631e+07
3_5	3_5_01.raw	sp|P49588|SYAC_HUMAN	P49588	AARS	IVAVTGAEAQK	C47H83N13O16[M+2H]	IVAVTGAEAQK(+H2)	543.811	46.26	2.82181e+07
3_6	3_6_01.raw	sp|P49588|SYAC_HUMAN	P49588	AARS	IVAVTGAEAQK	C47H83N13O16[M+2H]	IVAVTGAEAQK(+H2)	543.811	46.26	1.59416e+07
4_4	4_4_01.raw	sp|P49588|SYAC_HUMAN	P49588	AARS	IVAVTGAEAQK	C47H83N13O16[M+2H]	IVAVTGAEAQK(+H2)	543.811	46.26	2.72122e+07
4_5	4_5_01.raw	sp|P49588|SYAC_HUMAN	P49588	AARS	IVAVTGAEAQK	C47H83N13O16[M+2H]	IVAVTGAEAQK(+H2)	543.811	46.26	9.36778e+06
4_6	4_6_01.raw	sp|P49588|SYAC_HUMAN	P49588	AARS	IVAVTGAEAQK	C47H83N13O16[M+2H]	IVAVTGAEAQK(+H2)	543.811	46.26	1.42119e+07
1_7	1_7_01.raw	sp|P49588|SYAC_HUMAN	P49588	AARS	IVAVTGAEAQK	C47H83N13O16[M+2H]	IVAVTGAEAQK(+H2)	543.811	46.26	9.17185e+06
1_8	1_8_01_171211223541.raw	sp|P49588|SYAC_HUMAN	P49588	AARS	IVAVTGAEAQK	C47H83N13O16[M+2H]	IVAVTGAEAQK(+H2)	543.811	46.26	7407057
1_9	1_9_01.raw	sp|P49588|SYAC_HUMAN	P49588	AARS	IVAVTGAEAQK	C47H83N13O16[M+2H]	IVAVTGAEAQK(+H2)	543.811	46.26	2.32202e+07
2_7	2_7_01.raw	sp|P49588|SYAC_HUMAN	P49588	AARS	IVAVTGAEAQK	C47H83N13O16[M+2H]	IVAVTGAEAQK(+H2)	543.811	46.26	9.69554e+06
2_8	2_8_01.raw	sp|P49588|SYAC_HUMAN	P49588	AARS	IVAVTGAEAQK	C47H83N13O16[M+2H]	IVAVTGAEAQK(+H2)	543.811	46.26	3.39899e+07
2_9	2_9_01_171217123101.raw	sp|P49588|SYAC_HUMAN	P49588	AARS	IVAVTGAEAQK	C47H83N13O16[M+2H]	IVAVTGAEAQK(+H2)	543.811	46.26	3.87034e+07
3_7	3_7_01.raw	sp|P49588|SYAC_HUMAN	P49588	AARS	IVAVTGAEAQK	C47H83N13O16[M+2H]	IVAVTGAEAQK(+H2)	543.811	46.26	5.58251e+06
3_8	3_8_01.raw	sp|P49588|SYAC_HUMAN	P49588	AARS	IVAVTGAEAQK	C47H83N13O16[M+2H]	IVAVTGAEAQK(+H2)	543.811	46.26	2.88033e+07
3_9	3_9_01.raw	sp|P49588|SYAC_HUMAN	P49588	AARS	IVAVTGAEAQK	C47H83N13O16[M+2H]	IVAVTGAEAQK(+H2)	543.811	46.26	2.92221e+07
4_7	4_7_01.raw	sp|P49588|SYAC_HUMAN	P49588	AARS	IVAVTGAEAQK	C47H83N13O16[M+2H]	IVAVTGAEAQK(+H2)	543.811	46.26	3.60006e+07
4_8	4_8_01.raw	sp|P49588|SYAC_HUMAN	P49588	AARS	IVAVTGAEAQK	C47H83N13O16[M+2H]	IVAVTGAEAQK(+H2)	543.811	46.26	1.62716e+07
4_9	4_9_01.raw	sp|P49588|SYAC_HUMAN	P49588	AARS	IVAVTGAEAQK	C47H83N13O16[M+2H]	IVAVTGAEAQK(+H2)	543.811	46.26	1.15638e+07
1_10	1_10_01.raw	sp|P49588|SYAC_HUMAN	P49588	AARS	IVAVTGAEAQK	C47H83N13O16[M+2H]	IVAVTGAEAQK(+H2)	543.811	46.26	2.95878e+07
1_11	1_11_01.raw	sp|P49588|SYAC_HUMAN	P49588	AARS	IVAVTGAEAQK	C47H83N13O16[M+2H]	IVAVTGAEAQK(+H2)	543.811	46.26	2.54152e+07
1_12	1_12_01.raw	sp|P49588|SYAC_HUMAN	P49588	AARS	IVAVTGAEAQK	C47H83N13O16[M+2H]	IVAVTGAEAQK(+H2)	543.811	46.26	7.64736e+06
2_10	2_10_01.raw	sp|P49588|SYAC_HUMAN	P49588	AARS	IVAVTGAEAQK	C47H83N13O16[M+2H]	IVAVTGAEAQK(+H2)	543.811	46.26	1.32343e+07
2_11	2_11_01_171223040132.raw	sp|P49588|SYAC_HUMAN	P49588	AARS	IVAVTGAEAQK	C47H83N13O16[M+2H]	IVAVTGAEAQK(+H2)	543.811	46.26	1.45361e+07
2_12	2_12_01.raw	sp|P49588|SYAC_HUMAN	P49588	AARS	IVAVTGAEAQK	C47H83N13O16[M+2H]	IVAVTGAEAQK(+H2)	543.811	46.26	1.39479e+07
3_10	3_10_01.raw	sp|P49588|SYAC_HUMAN	P49588	AARS	IVAVTGAEAQK	C47H83N13O16[M+2H]	IVAVTGAEAQK(+H2)	543.811	46.26	1.13057e+07
3_11	3_11_01.raw	sp|P49588|SYAC_HUMAN	P49588	AARS	IVAVTGAEAQK	C47H83N13O16[M+2H]	IVAVTGAEAQK(+H2)	543.811	46.26	1.48458e+07
Chromatograms	FinalList2_1.raw	sp|P49588|SYAC_HUMAN	P49588	AARS	QFIDSNPNQPLVILEMESGASAK	C108H174N28O37S[M+3H]	QFIDSNPNQPLVILEMESGASAK(+H3)	830.084	113.36
GPS01	GPS01_1.raw	sp|P49588|SYAC_HUMAN	P49588	AARS	QFIDSNPNQPLVILEMESGASAK	C108H174N28O37S[M+3H]	QFIDSNPNQPLVILEMESGASAK(+H3)	830.084	113.36	2.34811e+06
GPS02	GPS02_1.raw	sp|P49588|SYAC_HUMAN	P49588	AARS	QFIDSNPNQPLVILEMESGASAK	C108H174N28O37S[M+3H]	QFIDSNPNQPLVILEMESGASAK(+H3)	830.084	113.36	1.90383e+06
GPS03	GPS03_1.raw	sp|P49588|SYAC_HUMAN	P49588	AARS	QFIDSNPNQPLVILEMESGASAK	C108H174N28O37S[M+3H]	QFIDSNPNQPLVILEMESGASAK(+H3)	830.084	113.36	1.85556e+06
GPS04	GPS04_1.raw	sp|P49588|SYAC_HUMAN	P49588	AARS	QFIDSNPNQPLVILEMESGASAK	C108H174N28O37S[M+3H]	QFIDSNPNQPLVILEMESGASAK(+H3)	830.084	113.36	2.2354e+06
GPS05	GPS_05_01.raw	sp|P49588|SYAC_HUMAN	P49588	AARS	QFIDSNPNQPLVILEMESGASAK	C108H174N28O37S[M+3H]	QFIDSNPNQPLVILEMESGASAK(+H3)	830.084	113.36	861777
GPS06	GPS_06_01.raw	sp|P49588|SYAC_HUMAN	P49588	AARS	QFIDSNPNQPLVILEMESGASAK	C108H174N28O37S[M+3H]	QFIDSNPNQPLVILEMESGASAK(+H3)	830.084	113.36	1.35322e+06
1_1	1_1_01.raw	sp|P49588|SYAC_HUMAN	P49588	AARS	QFIDSNPNQPLVILEMESGASAK	C108H174N28O37S[M+3H]	QFIDSNPNQPLVILEMESGASAK(+H3)	830.084	113.36	2.04419e+06
1_2	1_2_01.raw	sp|P49588|SYAC_HUMAN	P49588	AARS	QFIDSNPNQPLVILEMESGASAK	C108H174N28O37S[M+3H]	QFIDSNPNQPLVILEMESGASAK(+H3)	830.084	113.36	2.25429e+06
1_3	1_3_01.raw	sp|P49588|SYAC_HUMAN	P49588	AARS	QFIDSNPNQPLVILEMESGASAK	C108H174N28O37S[M+3H]	QFIDSNPNQPLVILEMESGASAK(+H3)	830.084	113.36	2.55693e+06
2_1	2_1_01.raw	sp|P49588|SYAC_HUMAN	P49588	AARS	QFIDSNPNQPLVILEMESGASAK	C108H174N28O37S[M+3H]	QFIDSNPNQPLVILEMESGASAK(+H3)	830.084	113.36	1.64366e+06
2_2	2_2_01.raw	sp|P49588|SYAC_HUMAN	P49588	AARS	QFIDSNPNQPLVILEMESGASAK	C108H174N28O37S[M+3H]	QFIDSNPNQPLVILEMESGASAK(+H3)	830.084	113.36	2.50618e+06
2_3	2_3_01.raw	sp|P49588|SYAC_HUMAN	P49588	AARS	QFIDSNPNQPLVILEMESGASAK	C108H174N28O37S[M+3H]	QFIDSNPNQPLVILEMESGASAK(+H3)	830.084	113.36	5.32239e+06
3_1	3_1_01.raw	sp|P49588|SYAC_HUMAN	P49588	AARS	QFIDSNPNQPLVILEMESGASAK	C108H174N28O37S[M+3H]	QFIDSNPNQPLVILEMESGASAK(+H3)	830.084	113.36	651505
3_2	3_2_01_171223210221.raw	sp|P49588|SYAC_HUMAN	P49588	AARS	QFIDSNPNQPLVILEMESGASAK	C108H174N28O37S[M+3H]	QFIDSNPNQPLVILEMESGASAK(+H3)	830.084	113.36	1.13576e+06
3_3	3_3_01.raw	sp|P49588|SYAC_HUMAN	P49588	AARS	QFIDSNPNQPLVILEMESGASAK	C108H174N28O37S[M+3H]	QFIDSNPNQPLVILEMESGASAK(+H3)	830.084	113.36	1.34445e+06
4_1	4_1_01.raw	sp|P49588|SYAC_HUMAN	P49588	AARS	QFIDSNPNQPLVILEMESGASAK	C108H174N28O37S[M+3H]	QFIDSNPNQPLVILEMESGASAK(+H3)	830.084	113.36	194794
4_2	4_2_01.raw	sp|P49588|SYAC_HUMAN	P49588	AARS	QFIDSNPNQPLVILEMESGASAK	C108H174N28O37S[M+3H]	QFIDSNPNQPLVILEMESGASAK(+H3)	830.084	113.36	1.21928e+06
4_3	4_3_01.raw	sp|P49588|SYAC_HUMAN	P49588	AARS	QFIDSNPNQPLVILEMESGASAK	C108H174N28O37S[M+3H]	QFIDSNPNQPLVILEMESGASAK(+H3)	830.084	113.36	1.9031e+06
1_4	1_4_01.raw	sp|P49588|SYAC_HUMAN	P49588	AARS	QFIDSNPNQPLVILEMESGASAK	C108H174N28O37S[M+3H]	QFIDSNPNQPLVILEMESGASAK(+H3)	830.084	113.36	452153
1_5	1_5_01.raw	sp|P49588|SYAC_HUMAN	P49588	AARS	QFIDSNPNQPLVILEMESGASAK	C108H174N28O37S[M+3H]	QFIDSNPNQPLVILEMESGASAK(+H3)	830.084	113.36	2.35651e+06
1_6	1_6_01.raw	sp|P49588|SYAC_HUMAN	P49588	AARS	QFIDSNPNQPLVILEMESGASAK	C108H174N28O37S[M+3H]	QFIDSNPNQPLVILEMESGASAK(+H3)	830.084	113.36	3.30433e+06
2_4	2_4_01.raw	sp|P49588|SYAC_HUMAN	P49588	AARS	QFIDSNPNQPLVILEMESGASAK	C108H174N28O37S[M+3H]	QFIDSNPNQPLVILEMESGASAK(+H3)	830.084	113.36	6.21567e+06
2_5	2_5_01.raw	sp|P49588|SYAC_HUMAN	P49588	AARS	QFIDSNPNQPLVILEMESGASAK	C108H174N28O37S[M+3H]	QFIDSNPNQPLVILEMESGASAK(+H3)	830.084	113.36	7.28466e+06
2_6	2_6_01.raw	sp|P49588|SYAC_HUMAN	P49588	AARS	QFIDSNPNQPLVILEMESGASAK	C108H174N28O37S[M+3H]	QFIDSNPNQPLVILEMESGASAK(+H3)	830.084	113.36	5.85171e+06
3_4	3_4_01.raw	sp|P49588|SYAC_HUMAN	P49588	AARS	QFIDSNPNQPLVILEMESGASAK	C108H174N28O37S[M+3H]	QFIDSNPNQPLVILEMESGASAK(+H3)	830.084	113.36	1.25244e+06
3_5	3_5_01.raw	sp|P49588|SYAC_HUMAN	P49588	AARS	QFIDSNPNQPLVILEMESGASAK	C108H174N28O37S[M+3H]	QFIDSNPNQPLVILEMESGASAK(+H3)	830.084	113.36	1.99319e+06
3_6	3_6_01.raw	sp|P49588|SYAC_HUMAN	P49588	AARS	QFIDSNPNQPLVILEMESGASAK	C108H174N28O37S[M+3H]	QFIDSNPNQPLVILEMESGASAK(+H3)	830.084	113.36	1.21656e+06
4_4	4_4_01.raw	sp|P49588|SYAC_HUMAN	P49588	AARS	QFIDSNPNQPLVILEMESGASAK	C108H174N28O37S[M+3H]	QFIDSNPNQPLVILEMESGASAK(+H3)	830.084	113.36	4.39219e+06
4_5	4_5_01.raw	sp|P49588|SYAC_HUMAN	P49588	AARS	QFIDSNPNQPLVILEMESGASAK	C108H174N28O37S[M+3H]	QFIDSNPNQPLVILEMESGASAK(+H3)	830.084	113.36	1.64624e+06
4_6	4_6_01.raw	sp|P49588|SYAC_HUMAN	P49588	AARS	QFIDSNPNQPLVILEMESGASAK	C108H174N28O37S[M+3H]	QFIDSNPNQPLVILEMESGASAK(+H3)	830.084	113.36	2.14012e+06
1_7	1_7_01.raw	sp|P49588|SYAC_HUMAN	P49588	AARS	QFIDSNPNQPLVILEMESGASAK	C108H174N28O37S[M+3H]	QFIDSNPNQPLVILEMESGASAK(+H3)	830.084	113.36	658961
1_8	1_8_01_171211223541.raw	sp|P49588|SYAC_HUMAN	P49588	AARS	QFIDSNPNQPLVILEMESGASAK	C108H174N28O37S[M+3H]	QFIDSNPNQPLVILEMESGASAK(+H3)	830.084	113.36	370337
1_9	1_9_01.raw	sp|P49588|SYAC_HUMAN	P49588	AARS	QFIDSNPNQPLVILEMESGASAK	C108H174N28O37S[M+3H]	QFIDSNPNQPLVILEMESGASAK(+H3)	830.084	113.36	1.77212e+06
2_7	2_7_01.raw	sp|P49588|SYAC_HUMAN	P49588	AARS	QFIDSNPNQPLVILEMESGASAK	C108H174N28O37S[M+3H]	QFIDSNPNQPLVILEMESGASAK(+H3)	830.084	113.36	1.22408e+06
2_8	2_8_01.raw	sp|P49588|SYAC_HUMAN	P49588	AARS	QFIDSNPNQPLVILEMESGASAK	C108H174N28O37S[M+3H]	QFIDSNPNQPLVILEMESGASAK(+H3)	830.084	113.36	4.19037e+06
2_9	2_9_01_171217123101.raw	sp|P49588|SYAC_HUMAN	P49588	AARS	QFIDSNPNQPLVILEMESGASAK	C108H174N28O37S[M+3H]	QFIDSNPNQPLVILEMESGASAK(+H3)	830.084	113.36	4.28862e+06
3_7	3_7_01.raw	sp|P49588|SYAC_HUMAN	P49588	AARS	QFIDSNPNQPLVILEMESGASAK	C108H174N28O37S[M+3H]	QFIDSNPNQPLVILEMESGASAK(+H3)	830.084	113.36	441296
3_8	3_8_01.raw	sp|P49588|SYAC_HUMAN	P49588	AARS	QFIDSNPNQPLVILEMESGASAK	C108H174N28O37S[M+3H]	QFIDSNPNQPLVILEMESGASAK(+H3)	830.084	113.36	2.85651e+06
3_9	3_9_01.raw	sp|P49588|SYAC_HUMAN	P49588	AARS	QFIDSNPNQPLVILEMESGASAK	C108H174N28O37S[M+3H]	QFIDSNPNQPLVILEMESGASAK(+H3)	830.084	113.36	3.31254e+06
4_7	4_7_01.raw	sp|P49588|SYAC_HUMAN	P49588	AARS	QFIDSNPNQPLVILEMESGASAK	C108H174N28O37S[M+3H]	QFIDSNPNQPLVILEMESGASAK(+H3)	830.084	113.36	4.07057e+06
4_8	4_8_01.raw	sp|P49588|SYAC_HUMAN	P49588	AARS	QFIDSNPNQPLVILEMESGASAK	C108H174N28O37S[M+3H]	QFIDSNPNQPLVILEMESGASAK(+H3)	830.084	113.36	1.93519e+06
4_9	4_9_01.raw	sp|P49588|SYAC_HUMAN	P49588	AARS	QFIDSNPNQPLVILEMESGASAK	C108H174N28O37S[M+3H]	QFIDSNPNQPLVILEMESGASAK(+H3)	830.084	113.36	1.45691e+06
1_10	1_10_01.raw	sp|P49588|SYAC_HUMAN	P49588	AARS	QFIDSNPNQPLVILEMESGASAK	C108H174N28O37S[M+3H]	QFIDSNPNQPLVILEMESGASAK(+H3)	830.084	113.36	2.20356e+06
1_11	1_11_01.raw	sp|P49588|SYAC_HUMAN	P49588	AARS	QFIDSNPNQPLVILEMESGASAK	C108H174N28O37S[M+3H]	QFIDSNPNQPLVILEMESGASAK(+H3)	830.084	113.36	1.58105e+06
1_12	1_12_01.raw	sp|P49588|SYAC_HUMAN	P49588	AARS	QFIDSNPNQPLVILEMESGASAK	C108H174N28O37S[M+3H]	QFIDSNPNQPLVILEMESGASAK(+H3)	830.084	113.36	536174
2_10	2_10_01.raw	sp|P49588|SYAC_HUMAN	P49588	AARS	QFIDSNPNQPLVILEMESGASAK	C108H174N28O37S[M+3H]	QFIDSNPNQPLVILEMESGASAK(+H3)	830.084	113.36	1.9965e+06
2_11	2_11_01_171223040132.raw	sp|P49588|SYAC_HUMAN	P49588	AARS	QFIDSNPNQPLVILEMESGASAK	C108H174N28O37S[M+3H]	QFIDSNPNQPLVILEMESGASAK(+H3)	830.084	113.36	1.06255e+06
2_12	2_12_01.raw	sp|P49588|SYAC_HUMAN	P49588	AARS	QFIDSNPNQPLVILEMESGASAK	C108H174N28O37S[M+3H]	QFIDSNPNQPLVILEMESGASAK(+H3)	830.084	113.36	755677
3_10	3_10_01.raw	sp|P49588|SYAC_HUMAN	P49588	AARS	QFIDSNPNQPLVILEMESGASAK	C108H174N28O37S[M+3H]	QFIDSNPNQPLVILEMESGASAK(+H3)	830.084	113.36	947660
3_11	3_11_01.raw	sp|P49588|SYAC_HUMAN	P49588	AARS	QFIDSNPNQPLVILEMESGASAK	C108H174N28O37S[M+3H]	QFIDSNPNQPLVILEMESGASAK(+H3)	830.084	113.36	1.27332e+06
Chromatograms	FinalList2_1.raw	sp|Q8NE71|ABCF1_HUMAN	Q8NE71	ABCF1	AANAAENDFSVSQAEMSSR	C79H125N25O33S[M+2H]	AANAAENDFSVSQAEMSSR(+H2)	992.937	65.84
GPS01	GPS01_1.raw	sp|Q8NE71|ABCF1_HUMAN	Q8NE71	ABCF1	AANAAENDFSVSQAEMSSR	C79H125N25O33S[M+2H]	AANAAENDFSVSQAEMSSR(+H2)	992.937	65.84	428247
GPS02	GPS02_1.raw	sp|Q8NE71|ABCF1_HUMAN	Q8NE71	ABCF1	AANAAENDFSVSQAEMSSR	C79H125N25O33S[M+2H]	AANAAENDFSVSQAEMSSR(+H2)	992.937	65.84	403585
GPS03	GPS03_1.raw	sp|Q8NE71|ABCF1_HUMAN	Q8NE71	ABCF1	AANAAENDFSVSQAEMSSR	C79H125N25O33S[M+2H]	AANAAENDFSVSQAEMSSR(+H2)	992.937	65.84	457567
GPS04	GPS04_1.raw	sp|Q8NE71|ABCF1_HUMAN	Q8NE71	ABCF1	AANAAENDFSVSQAEMSSR	C79H125N25O33S[M+2H]	AANAAENDFSVSQAEMSSR(+H2)	992.937	65.84	424083
GPS05	GPS_05_01.raw	sp|Q8NE71|ABCF1_HUMAN	Q8NE71	ABCF1	AANAAENDFSVSQAEMSSR	C79H125N25O33S[M+2H]	AANAAENDFSVSQAEMSSR(+H2)	992.937	65.84	462640
GPS06	GPS_06_01.raw	sp|Q8NE71|ABCF1_HUMAN	Q8NE71	ABCF1	AANAAENDFSVSQAEMSSR	C79H125N25O33S[M+2H]	AANAAENDFSVSQAEMSSR(+H2)	992.937	65.84	308421
1_1	1_1_01.raw	sp|Q8NE71|ABCF1_HUMAN	Q8NE71	ABCF1	AANAAENDFSVSQAEMSSR	C79H125N25O33S[M+2H]	AANAAENDFSVSQAEMSSR(+H2)	992.937	65.84	307470
1_2	1_2_01.raw	sp|Q8NE71|ABCF1_HUMAN	Q8NE71	ABCF1	AANAAENDFSVSQAEMSSR	C79H125N25O33S[M+2H]	AANAAENDFSVSQAEMSSR(+H2)	992.937	65.84	605767
1_3	1_3_01.raw	sp|Q8NE71|ABCF1_HUMAN	Q8NE71	ABCF1	AANAAENDFSVSQAEMSSR	C79H125N25O33S[M+2H]	AANAAENDFSVSQAEMSSR(+H2)	992.937	65.84	443318
2_1	2_1_01.raw	sp|Q8NE71|ABCF1_HUMAN	Q8NE71	ABCF1	AANAAENDFSVSQAEMSSR	C79H125N25O33S[M+2H]	AANAAENDFSVSQAEMSSR(+H2)	992.937	65.84	81759.6
2_2	2_2_01.raw	sp|Q8NE71|ABCF1_HUMAN	Q8NE71	ABCF1	AANAAENDFSVSQAEMSSR	C79H125N25O33S[M+2H]	AANAAENDFSVSQAEMSSR(+H2)	992.937	65.84	272198
2_3	2_3_01.raw	sp|Q8NE71|ABCF1_HUMAN	Q8NE71	ABCF1	AANAAENDFSVSQAEMSSR	C79H125N25O33S[M+2H]	AANAAENDFSVSQAEMSSR(+H2)	992.937	65.84	718759
3_1	3_1_01.raw	sp|Q8NE71|ABCF1_HUMAN	Q8NE71	ABCF1	AANAAENDFSVSQAEMSSR	C79H125N25O33S[M+2H]	AANAAENDFSVSQAEMSSR(+H2)	992.937	65.84	127991
3_2	3_2_01_171223210221.raw	sp|Q8NE71|ABCF1_HUMAN	Q8NE71	ABCF1	AANAAENDFSVSQAEMSSR	C79H125N25O33S[M+2H]	AANAAENDFSVSQAEMSSR(+H2)	992.937	65.84	228549
3_3	3_3_01.raw	sp|Q8NE71|ABCF1_HUMAN	Q8NE71	ABCF1	AANAAENDFSVSQAEMSSR	C79H125N25O33S[M+2H]	AANAAENDFSVSQAEMSSR(+H2)	992.937	65.84	197261
4_1	4_1_01.raw	sp|Q8NE71|ABCF1_HUMAN	Q8NE71	ABCF1	AANAAENDFSVSQAEMSSR	C79H125N25O33S[M+2H]	AANAAENDFSVSQAEMSSR(+H2)	992.937	65.84	0
4_2	4_2_01.raw	sp|Q8NE71|ABCF1_HUMAN	Q8NE71	ABCF1	AANAAENDFSVSQAEMSSR	C79H125N25O33S[M+2H]	AANAAENDFSVSQAEMSSR(+H2)	992.937	65.84	42759
4_3	4_3_01.raw	sp|Q8NE71|ABCF1_HUMAN	Q8NE71	ABCF1	AANAAENDFSVSQAEMSSR	C79H125N25O33S[M+2H]	AANAAENDFSVSQAEMSSR(+H2)	992.937	65.84	179008
1_4	1_4_01.raw	sp|Q8NE71|ABCF1_HUMAN	Q8NE71	ABCF1	AANAAENDFSVSQAEMSSR	C79H125N25O33S[M+2H]	AANAAENDFSVSQAEMSSR(+H2)	992.937	65.84	254054
1_5	1_5_01.raw	sp|Q8NE71|ABCF1_HUMAN	Q8NE71	ABCF1	AANAAENDFSVSQAEMSSR	C79H125N25O33S[M+2H]	AANAAENDFSVSQAEMSSR(+H2)	992.937	65.84	211645
1_6	1_6_01.raw	sp|Q8NE71|ABCF1_HUMAN	Q8NE71	ABCF1	AANAAENDFSVSQAEMSSR	C79H125N25O33S[M+2H]	AANAAENDFSVSQAEMSSR(+H2)	992.937	65.84	788024
2_4	2_4_01.raw	sp|Q8NE71|ABCF1_HUMAN	Q8NE71	ABCF1	AANAAENDFSVSQAEMSSR	C79H125N25O33S[M+2H]	AANAAENDFSVSQAEMSSR(+H2)	992.937	65.84	813186
2_5	2_5_01.raw	sp|Q8NE71|ABCF1_HUMAN	Q8NE71	ABCF1	AANAAENDFSVSQAEMSSR	C79H125N25O33S[M+2H]	AANAAENDFSVSQAEMSSR(+H2)	992.937	65.84	577802
2_6	2_6_01.raw	sp|Q8NE71|ABCF1_HUMAN	Q8NE71	ABCF1	AANAAENDFSVSQAEMSSR	C79H125N25O33S[M+2H]	AANAAENDFSVSQAEMSSR(+H2)	992.937	65.84	498292
3_4	3_4_01.raw	sp|Q8NE71|ABCF1_HUMAN	Q8NE71	ABCF1	AANAAENDFSVSQAEMSSR	C79H125N25O33S[M+2H]	AANAAENDFSVSQAEMSSR(+H2)	992.937	65.84	224906
3_5	3_5_01.raw	sp|Q8NE71|ABCF1_HUMAN	Q8NE71	ABCF1	AANAAENDFSVSQAEMSSR	C79H125N25O33S[M+2H]	AANAAENDFSVSQAEMSSR(+H2)	992.937	65.84	510310
3_6	3_6_01.raw	sp|Q8NE71|ABCF1_HUMAN	Q8NE71	ABCF1	AANAAENDFSVSQAEMSSR	C79H125N25O33S[M+2H]	AANAAENDFSVSQAEMSSR(+H2)	992.937	65.84	177460
4_4	4_4_01.raw	sp|Q8NE71|ABCF1_HUMAN	Q8NE71	ABCF1	AANAAENDFSVSQAEMSSR	C79H125N25O33S[M+2H]	AANAAENDFSVSQAEMSSR(+H2)	992.937	65.84	463783
4_5	4_5_01.raw	sp|Q8NE71|ABCF1_HUMAN	Q8NE71	ABCF1	AANAAENDFSVSQAEMSSR	C79H125N25O33S[M+2H]	AANAAENDFSVSQAEMSSR(+H2)	992.937	65.84	189107
4_6	4_6_01.raw	sp|Q8NE71|ABCF1_HUMAN	Q8NE71	ABCF1	AANAAENDFSVSQAEMSSR	C79H125N25O33S[M+2H]	AANAAENDFSVSQAEMSSR(+H2)	992.937	65.84	165620
1_7	1_7_01.raw	sp|Q8NE71|ABCF1_HUMAN	Q8NE71	ABCF1	AANAAENDFSVSQAEMSSR	C79H125N25O33S[M+2H]	AANAAENDFSVSQAEMSSR(+H2)	992.937	65.84	271802
1_8	1_8_01_171211223541.raw	sp|Q8NE71|ABCF1_HUMAN	Q8NE71	ABCF1	AANAAENDFSVSQAEMSSR	C79H125N25O33S[M+2H]	AANAAENDFSVSQAEMSSR(+H2)	992.937	65.84	265058
1_9	1_9_01.raw	sp|Q8NE71|ABCF1_HUMAN	Q8NE71	ABCF1	AANAAENDFSVSQAEMSSR	C79H125N25O33S[M+2H]	AANAAENDFSVSQAEMSSR(+H2)	992.937	65.84	717143
2_7	2_7_01.raw	sp|Q8NE71|ABCF1_HUMAN	Q8NE71	ABCF1	AANAAENDFSVSQAEMSSR	C79H125N25O33S[M+2H]	AANAAENDFSVSQAEMSSR(+H2)	992.937	65.84	265660
2_8	2_8_01.raw	sp|Q8NE71|ABCF1_HUMAN	Q8NE71	ABCF1	AANAAENDFSVSQAEMSSR	C79H125N25O33S[M+2H]	AANAAENDFSVSQAEMSSR(+H2)	992.937	65.84	494007
2_9	2_9_01_171217123101.raw	sp|Q8NE71|ABCF1_HUMAN	Q8NE71	ABCF1	AANAAENDFSVSQAEMSSR	C79H125N25O33S[M+2H]	AANAAENDFSVSQAEMSSR(+H2)	992.937	65.84	394621
3_7	3_7_01.raw	sp|Q8NE71|ABCF1_HUMAN	Q8NE71	ABCF1	AANAAENDFSVSQAEMSSR	C79H125N25O33S[M+2H]	AANAAENDFSVSQAEMSSR(+H2)	992.937	65.84	132921
3_8	3_8_01.raw	sp|Q8NE71|ABCF1_HUMAN	Q8NE71	ABCF1	AANAAENDFSVSQAEMSSR	C79H125N25O33S[M+2H]	AANAAENDFSVSQAEMSSR(+H2)	992.937	65.84	269378
3_9	3_9_01.raw	sp|Q8NE71|ABCF1_HUMAN	Q8NE71	ABCF1	AANAAENDFSVSQAEMSSR	C79H125N25O33S[M+2H]	AANAAENDFSVSQAEMSSR(+H2)	992.937	65.84	331559
4_7	4_7_01.raw	sp|Q8NE71|ABCF1_HUMAN	Q8NE71	ABCF1	AANAAENDFSVSQAEMSSR	C79H125N25O33S[M+2H]	AANAAENDFSVSQAEMSSR(+H2)	992.937	65.84	387472
4_8	4_8_01.raw	sp|Q8NE71|ABCF1_HUMAN	Q8NE71	ABCF1	AANAAENDFSVSQAEMSSR	C79H125N25O33S[M+2H]	AANAAENDFSVSQAEMSSR(+H2)	992.937	65.84	196408
4_9	4_9_01.raw	sp|Q8NE71|ABCF1_HUMAN	Q8NE71	ABCF1	AANAAENDFSVSQAEMSSR	C79H125N25O33S[M+2H]	AANAAENDFSVSQAEMSSR(+H2)	992.937	65.84	274817
1_10	1_10_01.raw	sp|Q8NE71|ABCF1_HUMAN	Q8NE71	ABCF1	AANAAENDFSVSQAEMSSR	C79H125N25O33S[M+2H]	AANAAENDFSVSQAEMSSR(+H2)	992.937	65.84	548447
1_11	1_11_01.raw	sp|Q8NE71|ABCF1_HUMAN	Q8NE71	ABCF1	AANAAENDFSVSQAEMSSR	C79H125N25O33S[M+2H]	AANAAENDFSVSQAEMSSR(+H2)	992.937	65.84	183937
1_12	1_12_01.raw	sp|Q8NE71|ABCF1_HUMAN	Q8NE71	ABCF1	AANAAENDFSVSQAEMSSR	C79H125N25O33S[M+2H]	AANAAENDFSVSQAEMSSR(+H2)	992.937	65.84	45802.4
2_10	2_10_01.raw	sp|Q8NE71|ABCF1_HUMAN	Q8NE71	ABCF1	AANAAENDFSVSQAEMSSR	C79H125N25O33S[M+2H]	AANAAENDFSVSQAEMSSR(+H2)	992.937	65.84	441184
2_11	2_11_01_171223040132.raw	sp|Q8NE71|ABCF1_HUMAN	Q8NE71	ABCF1	AANAAENDFSVSQAEMSSR	C79H125N25O33S[M+2H]	AANAAENDFSVSQAEMSSR(+H2)	992.937	65.84	400199
2_12	2_12_01.raw	sp|Q8NE71|ABCF1_HUMAN	Q8NE71	ABCF1	AANAAENDFSVSQAEMSSR	C79H125N25O33S[M+2H]	AANAAENDFSVSQAEMSSR(+H2)	992.937	65.84	272918
3_10	3_10_01.raw	sp|Q8NE71|ABCF1_HUMAN	Q8NE71	ABCF1	AANAAENDFSVSQAEMSSR	C79H125N25O33S[M+2H]	AANAAENDFSVSQAEMSSR(+H2)	992.937	65.84	149018
3_11	3_11_01.raw	sp|Q8NE71|ABCF1_HUMAN	Q8NE71	ABCF1	AANAAENDFSVSQAEMSSR	C79H125N25O33S[M+2H]	AANAAENDFSVSQAEMSSR(+H2)	992.937	65.84	100916
Chromatograms	FinalList2_2.raw	sp|Q8NE71|ABCF1_HUMAN	Q8NE71	ABCF1	STLLLLLTGK	C49H91N11O14[M+2H]	STLLLLLTGK(+H2)	529.845	113.5
GPS01	GPS01_1.raw	sp|Q8NE71|ABCF1_HUMAN	Q8NE71	ABCF1	STLLLLLTGK	C49H91N11O14[M+2H]	STLLLLLTGK(+H2)	529.845	113.5	7.08015e+06
GPS02	GPS02_1.raw	sp|Q8NE71|ABCF1_HUMAN	Q8NE71	ABCF1	STLLLLLTGK	C49H91N11O14[M+2H]	STLLLLLTGK(+H2)	529.845	113.5	4.26028e+06
GPS03	GPS03_1.raw	sp|Q8NE71|ABCF1_HUMAN	Q8NE71	ABCF1	STLLLLLTGK	C49H91N11O14[M+2H]	STLLLLLTGK(+H2)	529.845	113.5	3.41655e+06
GPS04	GPS04_1.raw	sp|Q8NE71|ABCF1_HUMAN	Q8NE71	ABCF1	STLLLLLTGK	C49H91N11O14[M+2H]	STLLLLLTGK(+H2)	529.845	113.5	5.89821e+06
GPS05	GPS_05_01.raw	sp|Q8NE71|ABCF1_HUMAN	Q8NE71	ABCF1	STLLLLLTGK	C49H91N11O14[M+2H]	STLLLLLTGK(+H2)	529.845	113.5	9.67506e+06
GPS06	GPS_06_01.raw	sp|Q8NE71|ABCF1_HUMAN	Q8NE71	ABCF1	STLLLLLTGK	C49H91N11O14[M+2H]	STLLLLLTGK(+H2)	529.845	113.5	7.81392e+06
1_1	1_1_01.raw	sp|Q8NE71|ABCF1_HUMAN	Q8NE71	ABCF1	STLLLLLTGK	C49H91N11O14[M+2H]	STLLLLLTGK(+H2)	529.845	113.5	2.62984e+06
1_2	1_2_01.raw	sp|Q8NE71|ABCF1_HUMAN	Q8NE71	ABCF1	STLLLLLTGK	C49H91N11O14[M+2H]	STLLLLLTGK(+H2)	529.845	113.5	4.82839e+06
1_3	1_3_01.raw	sp|Q8NE71|ABCF1_HUMAN	Q8NE71	ABCF1	STLLLLLTGK	C49H91N11O14[M+2H]	STLLLLLTGK(+H2)	529.845	113.5	4.26188e+06
2_1	2_1_01.raw	sp|Q8NE71|ABCF1_HUMAN	Q8NE71	ABCF1	STLLLLLTGK	C49H91N11O14[M+2H]	STLLLLLTGK(+H2)	529.845	113.5	1.6294e+06
2_2	2_2_01.raw	sp|Q8NE71|ABCF1_HUMAN	Q8NE71	ABCF1	STLLLLLTGK	C49H91N11O14[M+2H]	STLLLLLTGK(+H2)	529.845	113.5	7.01036e+06
2_3	2_3_01.raw	sp|Q8NE71|ABCF1_HUMAN	Q8NE71	ABCF1	STLLLLLTGK	C49H91N11O14[M+2H]	STLLLLLTGK(+H2)	529.845	113.5	8.91706e+06
3_1	3_1_01.raw	sp|Q8NE71|ABCF1_HUMAN	Q8NE71	ABCF1	STLLLLLTGK	C49H91N11O14[M+2H]	STLLLLLTGK(+H2)	529.845	113.5	1.5439e+06
3_2	3_2_01_171223210221.raw	sp|Q8NE71|ABCF1_HUMAN	Q8NE71	ABCF1	STLLLLLTGK	C49H91N11O14[M+2H]	STLLLLLTGK(+H2)	529.845	113.5	2.35089e+06
3_3	3_3_01.raw	sp|Q8NE71|ABCF1_HUMAN	Q8NE71	ABCF1	STLLLLLTGK	C49H91N11O14[M+2H]	STLLLLLTGK(+H2)	529.845	113.5	2.97895e+06
4_1	4_1_01.raw	sp|Q8NE71|ABCF1_HUMAN	Q8NE71	ABCF1	STLLLLLTGK	C49H91N11O14[M+2H]	STLLLLLTGK(+H2)	529.845	113.5	794701
4_2	4_2_01.raw	sp|Q8NE71|ABCF1_HUMAN	Q8NE71	ABCF1	STLLLLLTGK	C49H91N11O14[M+2H]	STLLLLLTGK(+H2)	529.845	113.5	4.96693e+06
4_3	4_3_01.raw	sp|Q8NE71|ABCF1_HUMAN	Q8NE71	ABCF1	STLLLLLTGK	C49H91N11O14[M+2H]	STLLLLLTGK(+H2)	529.845	113.5	5.29409e+06
1_4	1_4_01.raw	sp|Q8NE71|ABCF1_HUMAN	Q8NE71	ABCF1	STLLLLLTGK	C49H91N11O14[M+2H]	STLLLLLTGK(+H2)	529.845	113.5	4.48442e+06
1_5	1_5_01.raw	sp|Q8NE71|ABCF1_HUMAN	Q8NE71	ABCF1	STLLLLLTGK	C49H91N11O14[M+2H]	STLLLLLTGK(+H2)	529.845	113.5	2.93176e+06
1_6	1_6_01.raw	sp|Q8NE71|ABCF1_HUMAN	Q8NE71	ABCF1	STLLLLLTGK	C49H91N11O14[M+2H]	STLLLLLTGK(+H2)	529.845	113.5	6.72481e+06
2_4	2_4_01.raw	sp|Q8NE71|ABCF1_HUMAN	Q8NE71	ABCF1	STLLLLLTGK	C49H91N11O14[M+2H]	STLLLLLTGK(+H2)	529.845	113.5	9.32275e+06
2_5	2_5_01.raw	sp|Q8NE71|ABCF1_HUMAN	Q8NE71	ABCF1	STLLLLLTGK	C49H91N11O14[M+2H]	STLLLLLTGK(+H2)	529.845	113.5	9.87031e+06
2_6	2_6_01.raw	sp|Q8NE71|ABCF1_HUMAN	Q8NE71	ABCF1	STLLLLLTGK	C49H91N11O14[M+2H]	STLLLLLTGK(+H2)	529.845	113.5	7.64634e+06
3_4	3_4_01.raw	sp|Q8NE71|ABCF1_HUMAN	Q8NE71	ABCF1	STLLLLLTGK	C49H91N11O14[M+2H]	STLLLLLTGK(+H2)	529.845	113.5	3.41638e+06
3_5	3_5_01.raw	sp|Q8NE71|ABCF1_HUMAN	Q8NE71	ABCF1	STLLLLLTGK	C49H91N11O14[M+2H]	STLLLLLTGK(+H2)	529.845	113.5	3.17009e+06
3_6	3_6_01.raw	sp|Q8NE71|ABCF1_HUMAN	Q8NE71	ABCF1	STLLLLLTGK	C49H91N11O14[M+2H]	STLLLLLTGK(+H2)	529.845	113.5	2.70619e+06
4_4	4_4_01.raw	sp|Q8NE71|ABCF1_HUMAN	Q8NE71	ABCF1	STLLLLLTGK	C49H91N11O14[M+2H]	STLLLLLTGK(+H2)	529.845	113.5	1.21174e+07
4_5	4_5_01.raw	sp|Q8NE71|ABCF1_HUMAN	Q8NE71	ABCF1	STLLLLLTGK	C49H91N11O14[M+2H]	STLLLLLTGK(+H2)	529.845	113.5	4.49726e+06
4_6	4_6_01.raw	sp|Q8NE71|ABCF1_HUMAN	Q8NE71	ABCF1	STLLLLLTGK	C49H91N11O14[M+2H]	STLLLLLTGK(+H2)	529.845	113.5	4.47692e+06
1_7	1_7_01.raw	sp|Q8NE71|ABCF1_HUMAN	Q8NE71	ABCF1	STLLLLLTGK	C49H91N11O14[M+2H]	STLLLLLTGK(+H2)	529.845	113.5	3.21121e+06
1_8	1_8_01_171211223541.raw	sp|Q8NE71|ABCF1_HUMAN	Q8NE71	ABCF1	STLLLLLTGK	C49H91N11O14[M+2H]	STLLLLLTGK(+H2)	529.845	113.5	2.45475e+06
1_9	1_9_01.raw	sp|Q8NE71|ABCF1_HUMAN	Q8NE71	ABCF1	STLLLLLTGK	C49H91N11O14[M+2H]	STLLLLLTGK(+H2)	529.845	113.5	4.72869e+06
2_7	2_7_01.raw	sp|Q8NE71|ABCF1_HUMAN	Q8NE71	ABCF1	STLLLLLTGK	C49H91N11O14[M+2H]	STLLLLLTGK(+H2)	529.845	113.5	4.57177e+06
2_8	2_8_01.raw	sp|Q8NE71|ABCF1_HUMAN	Q8NE71	ABCF1	STLLLLLTGK	C49H91N11O14[M+2H]	STLLLLLTGK(+H2)	529.845	113.5	7.58966e+06
2_9	2_9_01_171217123101.raw	sp|Q8NE71|ABCF1_HUMAN	Q8NE71	ABCF1	STLLLLLTGK	C49H91N11O14[M+2H]	STLLLLLTGK(+H2)	529.845	113.5	8.68986e+06
3_7	3_7_01.raw	sp|Q8NE71|ABCF1_HUMAN	Q8NE71	ABCF1	STLLLLLTGK	C49H91N11O14[M+2H]	STLLLLLTGK(+H2)	529.845	113.5	2.10885e+06
3_8	3_8_01.raw	sp|Q8NE71|ABCF1_HUMAN	Q8NE71	ABCF1	STLLLLLTGK	C49H91N11O14[M+2H]	STLLLLLTGK(+H2)	529.845	113.5	5.47587e+06
3_9	3_9_01.raw	sp|Q8NE71|ABCF1_HUMAN	Q8NE71	ABCF1	STLLLLLTGK	C49H91N11O14[M+2H]	STLLLLLTGK(+H2)	529.845	113.5	5.04453e+06
4_7	4_7_01.raw	sp|Q8NE71|ABCF1_HUMAN	Q8NE71	ABCF1	STLLLLLTGK	C49H91N11O14[M+2H]	STLLLLLTGK(+H2)	529.845	113.5	4.60442e+06
4_8	4_8_01.raw	sp|Q8NE71|ABCF1_HUMAN	Q8NE71	ABCF1	STLLLLLTGK	C49H91N11O14[M+2H]	STLLLLLTGK(+H2)	529.845	113.5	4.32072e+06
4_9	4_9_01.raw	sp|Q8NE71|ABCF1_HUMAN	Q8NE71	ABCF1	STLLLLLTGK	C49H91N11O14[M+2H]	STLLLLLTGK(+H2)	529.845	113.5	5.57879e+06
1_10	1_10_01.raw	sp|Q8NE71|ABCF1_HUMAN	Q8NE71	ABCF1	STLLLLLTGK	C49H91N11O14[M+2H]	STLLLLLTGK(+H2)	529.845	113.5	6.44384e+06
1_11	1_11_01.raw	sp|Q8NE71|ABCF1_HUMAN	Q8NE71	ABCF1	STLLLLLTGK	C49H91N11O14[M+2H]	STLLLLLTGK(+H2)	529.845	113.5	2.6962e+06
1_12	1_12_01.raw	sp|Q8NE71|ABCF1_HUMAN	Q8NE71	ABCF1	STLLLLLTGK	C49H91N11O14[M+2H]	STLLLLLTGK(+H2)	529.845	113.5	2.14543e+06
2_10	2_10_01.raw	sp|Q8NE71|ABCF1_HUMAN	Q8NE71	ABCF1	STLLLLLTGK	C49H91N11O14[M+2H]	STLLLLLTGK(+H2)	529.845	113.5	7.17442e+06
2_11	2_11_01_171223040132.raw	sp|Q8NE71|ABCF1_HUMAN	Q8NE71	ABCF1	STLLLLLTGK	C49H91N11O14[M+2H]	STLLLLLTGK(+H2)	529.845	113.5	2.1863e+06
2_12	2_12_01.raw	sp|Q8NE71|ABCF1_HUMAN	Q8NE71	ABCF1	STLLLLLTGK	C49H91N11O14[M+2H]	STLLLLLTGK(+H2)	529.845	113.5	1.11027e+06
3_10	3_10_01.raw	sp|Q8NE71|ABCF1_HUMAN	Q8NE71	ABCF1	STLLLLLTGK	C49H91N11O14[M+2H]	STLLLLLTGK(+H2)	529.845	113.5	2.98393e+06
3_11	3_11_01.raw	sp|Q8NE71|ABCF1_HUMAN	Q8NE71	ABCF1	STLLLLLTGK	C49H91N11O14[M+2H]	STLLLLLTGK(+H2)	529.845	113.5	5.23049e+06
Chromatograms	FinalList2_2.raw	sp|P05067|A4_HUMAN	P05067	ABETA	HDSGYEVHHQK	C57H81N19O19[M+3H]	HDSGYEVHHQK(+H3)	446.206	34.44
GPS01	GPS01_1.raw	sp|P05067|A4_HUMAN	P05067	ABETA	HDSGYEVHHQK	C57H81N19O19[M+3H]	HDSGYEVHHQK(+H3)	446.206	34.44	4.90834e+07
GPS02	GPS02_1.raw	sp|P05067|A4_HUMAN	P05067	ABETA	HDSGYEVHHQK	C57H81N19O19[M+3H]	HDSGYEVHHQK(+H3)	446.206	34.44	5.01275e+07
GPS03	GPS03_1.raw	sp|P05067|A4_HUMAN	P05067	ABETA	HDSGYEVHHQK	C57H81N19O19[M+3H]	HDSGYEVHHQK(+H3)	446.206	34.44	9.31543e+07
GPS04	GPS04_1.raw	sp|P05067|A4_HUMAN	P05067	ABETA	HDSGYEVHHQK	C57H81N19O19[M+3H]	HDSGYEVHHQK(+H3)	446.206	34.44	6.82963e+07
GPS05	GPS_05_01.raw	sp|P05067|A4_HUMAN	P05067	ABETA	HDSGYEVHHQK	C57H81N19O19[M+3H]	HDSGYEVHHQK(+H3)	446.206	34.44	6.82628e+07
GPS06	GPS_06_01.raw	sp|P05067|A4_HUMAN	P05067	ABETA	HDSGYEVHHQK	C57H81N19O19[M+3H]	HDSGYEVHHQK(+H3)	446.206	34.44	6.74284e+07
1_1	1_1_01.raw	sp|P05067|A4_HUMAN	P05067	ABETA	HDSGYEVHHQK	C57H81N19O19[M+3H]	HDSGYEVHHQK(+H3)	446.206	34.44	1.35117e+08
1_2	1_2_01.raw	sp|P05067|A4_HUMAN	P05067	ABETA	HDSGYEVHHQK	C57H81N19O19[M+3H]	HDSGYEVHHQK(+H3)	446.206	34.44	5.08307e+08
1_3	1_3_01.raw	sp|P05067|A4_HUMAN	P05067	ABETA	HDSGYEVHHQK	C57H81N19O19[M+3H]	HDSGYEVHHQK(+H3)	446.206	34.44	1.21846e+08
2_1	2_1_01.raw	sp|P05067|A4_HUMAN	P05067	ABETA	HDSGYEVHHQK	C57H81N19O19[M+3H]	HDSGYEVHHQK(+H3)	446.206	34.44	1.38248e+08
2_2	2_2_01.raw	sp|P05067|A4_HUMAN	P05067	ABETA	HDSGYEVHHQK	C57H81N19O19[M+3H]	HDSGYEVHHQK(+H3)	446.206	34.44	1.3821e+08
2_3	2_3_01.raw	sp|P05067|A4_HUMAN	P05067	ABETA	HDSGYEVHHQK	C57H81N19O19[M+3H]	HDSGYEVHHQK(+H3)	446.206	34.44	1.89714e+08
3_1	3_1_01.raw	sp|P05067|A4_HUMAN	P05067	ABETA	HDSGYEVHHQK	C57H81N19O19[M+3H]	HDSGYEVHHQK(+H3)	446.206	34.44	2.17091e+08
3_2	3_2_01_171223210221.raw	sp|P05067|A4_HUMAN	P05067	ABETA	HDSGYEVHHQK	C57H81N19O19[M+3H]	HDSGYEVHHQK(+H3)	446.206	34.44	300625553
3_3	3_3_01.raw	sp|P05067|A4_HUMAN	P05067	ABETA	HDSGYEVHHQK	C57H81N19O19[M+3H]	HDSGYEVHHQK(+H3)	446.206	34.44	8.02664e+07
4_1	4_1_01.raw	sp|P05067|A4_HUMAN	P05067	ABETA	HDSGYEVHHQK	C57H81N19O19[M+3H]	HDSGYEVHHQK(+H3)	446.206	34.44	4.51213e+07
4_2	4_2_01.raw	sp|P05067|A4_HUMAN	P05067	ABETA	HDSGYEVHHQK	C57H81N19O19[M+3H]	HDSGYEVHHQK(+H3)	446.206	34.44	2.31402e+08
4_3	4_3_01.raw	sp|P05067|A4_HUMAN	P05067	ABETA	HDSGYEVHHQK	C57H81N19O19[M+3H]	HDSGYEVHHQK(+H3)	446.206	34.44	1.77887e+08
1_4	1_4_01.raw	sp|P05067|A4_HUMAN	P05067	ABETA	HDSGYEVHHQK	C57H81N19O19[M+3H]	HDSGYEVHHQK(+H3)	446.206	34.44	76157.7
1_5	1_5_01.raw	sp|P05067|A4_HUMAN	P05067	ABETA	HDSGYEVHHQK	C57H81N19O19[M+3H]	HDSGYEVHHQK(+H3)	446.206	34.44	0
1_6	1_6_01.raw	sp|P05067|A4_HUMAN	P05067	ABETA	HDSGYEVHHQK	C57H81N19O19[M+3H]	HDSGYEVHHQK(+H3)	446.206	34.44	1.55986e+07
2_4	2_4_01.raw	sp|P05067|A4_HUMAN	P05067	ABETA	HDSGYEVHHQK	C57H81N19O19[M+3H]	HDSGYEVHHQK(+H3)	446.206	34.44	17355.3
2_5	2_5_01.raw	sp|P05067|A4_HUMAN	P05067	ABETA	HDSGYEVHHQK	C57H81N19O19[M+3H]	HDSGYEVHHQK(+H3)	446.206	34.44	9.37155e+06
2_6	2_6_01.raw	sp|P05067|A4_HUMAN	P05067	ABETA	HDSGYEVHHQK	C57H81N19O19[M+3H]	HDSGYEVHHQK(+H3)	446.206	34.44	0
3_4	3_4_01.raw	sp|P05067|A4_HUMAN	P05067	ABETA	HDSGYEVHHQK	C57H81N19O19[M+3H]	HDSGYEVHHQK(+H3)	446.206	34.44	0
3_5	3_5_01.raw	sp|P05067|A4_HUMAN	P05067	ABETA	HDSGYEVHHQK	C57H81N19O19[M+3H]	HDSGYEVHHQK(+H3)	446.206	34.44	0
3_6	3_6_01.raw	sp|P05067|A4_HUMAN	P05067	ABETA	HDSGYEVHHQK	C57H81N19O19[M+3H]	HDSGYEVHHQK(+H3)	446.206	34.44	67556.3
4_4	4_4_01.raw	sp|P05067|A4_HUMAN	P05067	ABETA	HDSGYEVHHQK	C57H81N19O19[M+3H]	HDSGYEVHHQK(+H3)	446.206	34.44	610990
4_5	4_5_01.raw	sp|P05067|A4_HUMAN	P05067	ABETA	HDSGYEVHHQK	C57H81N19O19[M+3H]	HDSGYEVHHQK(+H3)	446.206	34.44	87037.7
4_6	4_6_01.raw	sp|P05067|A4_HUMAN	P05067	ABETA	HDSGYEVHHQK	C57H81N19O19[M+3H]	HDSGYEVHHQK(+H3)	446.206	34.44	2.6402e+07
1_7	1_7_01.raw	sp|P05067|A4_HUMAN	P05067	ABETA	HDSGYEVHHQK	C57H81N19O19[M+3H]	HDSGYEVHHQK(+H3)	446.206	34.44	930958
1_8	1_8_01_171211223541.raw	sp|P05067|A4_HUMAN	P05067	ABETA	HDSGYEVHHQK	C57H81N19O19[M+3H]	HDSGYEVHHQK(+H3)	446.206	34.44	0
1_9	1_9_01.raw	sp|P05067|A4_HUMAN	P05067	ABETA	HDSGYEVHHQK	C57H81N19O19[M+3H]	HDSGYEVHHQK(+H3)	446.206	34.44	154446
2_7	2_7_01.raw	sp|P05067|A4_HUMAN	P05067	ABETA	HDSGYEVHHQK	C57H81N19O19[M+3H]	HDSGYEVHHQK(+H3)	446.206	34.44	256093
2_8	2_8_01.raw	sp|P05067|A4_HUMAN	P05067	ABETA	HDSGYEVHHQK	C57H81N19O19[M+3H]	HDSGYEVHHQK(+H3)	446.206	34.44	150323
2_9	2_9_01_171217123101.raw	sp|P05067|A4_HUMAN	P05067	ABETA	HDSGYEVHHQK	C57H81N19O19[M+3H]	HDSGYEVHHQK(+H3)	446.206	34.44	0
3_7	3_7_01.raw	sp|P05067|A4_HUMAN	P05067	ABETA	HDSGYEVHHQK	C57H81N19O19[M+3H]	HDSGYEVHHQK(+H3)	446.206	34.44	0
3_8	3_8_01.raw	sp|P05067|A4_HUMAN	P05067	ABETA	HDSGYEVHHQK	C57H81N19O19[M+3H]	HDSGYEVHHQK(+H3)	446.206	34.44	0
3_9	3_9_01.raw	sp|P05067|A4_HUMAN	P05067	ABETA	HDSGYEVHHQK	C57H81N19O19[M+3H]	HDSGYEVHHQK(+H3)	446.206	34.44	0
4_7	4_7_01.raw	sp|P05067|A4_HUMAN	P05067	ABETA	HDSGYEVHHQK	C57H81N19O19[M+3H]	HDSGYEVHHQK(+H3)	446.206	34.44	2.32996e+07
4_8	4_8_01.raw	sp|P05067|A4_HUMAN	P05067	ABETA	HDSGYEVHHQK	C57H81N19O19[M+3H]	HDSGYEVHHQK(+H3)	446.206	34.44	263714
4_9	4_9_01.raw	sp|P05067|A4_HUMAN	P05067	ABETA	HDSGYEVHHQK	C57H81N19O19[M+3H]	HDSGYEVHHQK(+H3)	446.206	34.44	56477.6
1_10	1_10_01.raw	sp|P05067|A4_HUMAN	P05067	ABETA	HDSGYEVHHQK	C57H81N19O19[M+3H]	HDSGYEVHHQK(+H3)	446.206	34.44	4.14393e+07
1_11	1_11_01.raw	sp|P05067|A4_HUMAN	P05067	ABETA	HDSGYEVHHQK	C57H81N19O19[M+3H]	HDSGYEVHHQK(+H3)	446.206	34.44	1.17688e+08
1_12	1_12_01.raw	sp|P05067|A4_HUMAN	P05067	ABETA	HDSGYEVHHQK	C57H81N19O19[M+3H]	HDSGYEVHHQK(+H3)	446.206	34.44	2.72345e+08
2_10	2_10_01.raw	sp|P05067|A4_HUMAN	P05067	ABETA	HDSGYEVHHQK	C57H81N19O19[M+3H]	HDSGYEVHHQK(+H3)	446.206	34.44	5.75317e+07
2_11	2_11_01_171223040132.raw	sp|P05067|A4_HUMAN	P05067	ABETA	HDSGYEVHHQK	C57H81N19O19[M+3H]	HDSGYEVHHQK(+H3)	446.206	34.44	1.95851e+08
2_12	2_12_01.raw	sp|P05067|A4_HUMAN	P05067	ABETA	HDSGYEVHHQK	C57H81N19O19[M+3H]	HDSGYEVHHQK(+H3)	446.206	34.44	3.98025e+07
3_10	3_10_01.raw	sp|P05067|A4_HUMAN	P05067	ABETA	HDSGYEVHHQK	C57H81N19O19[M+3H]	HDSGYEVHHQK(+H3)	446.206	34.44	1.34591e+08
3_11	3_11_01.raw	sp|P05067|A4_HUMAN	P05067	ABETA	HDSGYEVHHQK	C57H81N19O19[M+3H]	HDSGYEVHHQK(+H3)	446.206	34.44	2.45891e+07
Chromatograms	FinalList2_2.raw	sp|P05067|A4_HUMAN	P05067	ABETA	LVFFAEDVGSNK	C61H92N14O19[M+2H]	LVFFAEDVGSNK(+H2)	663.34	88.68
GPS01	GPS01_2.raw	sp|P05067|A4_HUMAN	P05067	ABETA	LVFFAEDVGSNK	C61H92N14O19[M+2H]	LVFFAEDVGSNK(+H2)	663.34	88.68	2192952972
GPS02	GPS02_2.raw	sp|P05067|A4_HUMAN	P05067	ABETA	LVFFAEDVGSNK	C61H92N14O19[M+2H]	LVFFAEDVGSNK(+H2)	663.34	88.68	2083133692
GPS03	GPS03_2.raw	sp|P05067|A4_HUMAN	P05067	ABETA	LVFFAEDVGSNK	C61H92N14O19[M+2H]	LVFFAEDVGSNK(+H2)	663.34	88.68	2301928532
GPS04	GPS04_2.raw	sp|P05067|A4_HUMAN	P05067	ABETA	LVFFAEDVGSNK	C61H92N14O19[M+2H]	LVFFAEDVGSNK(+H2)	663.34	88.68	2209390015
GPS05	GPS_05_02.raw	sp|P05067|A4_HUMAN	P05067	ABETA	LVFFAEDVGSNK	C61H92N14O19[M+2H]	LVFFAEDVGSNK(+H2)	663.34	88.68	3539588332
GPS06	GPS_06_02.raw	sp|P05067|A4_HUMAN	P05067	ABETA	LVFFAEDVGSNK	C61H92N14O19[M+2H]	LVFFAEDVGSNK(+H2)	663.34	88.68	3337605464
1_1	1_1_02.raw	sp|P05067|A4_HUMAN	P05067	ABETA	LVFFAEDVGSNK	C61H92N14O19[M+2H]	LVFFAEDVGSNK(+H2)	663.34	88.68	5019654541
1_2	1_2_02.raw	sp|P05067|A4_HUMAN	P05067	ABETA	LVFFAEDVGSNK	C61H92N14O19[M+2H]	LVFFAEDVGSNK(+H2)	663.34	88.68	13409083178
1_3	1_3_02.raw	sp|P05067|A4_HUMAN	P05067	ABETA	LVFFAEDVGSNK	C61H92N14O19[M+2H]	LVFFAEDVGSNK(+H2)	663.34	88.68	2466157153
2_1	2_1_02.raw	sp|P05067|A4_HUMAN	P05067	ABETA	LVFFAEDVGSNK	C61H92N14O19[M+2H]	LVFFAEDVGSNK(+H2)	663.34	88.68	4201486673
2_2	2_2_02.raw	sp|P05067|A4_HUMAN	P05067	ABETA	LVFFAEDVGSNK	C61H92N14O19[M+2H]	LVFFAEDVGSNK(+H2)	663.34	88.68	2668355606
2_3	2_3_02.raw	sp|P05067|A4_HUMAN	P05067	ABETA	LVFFAEDVGSNK	C61H92N14O19[M+2H]	LVFFAEDVGSNK(+H2)	663.34	88.68	4405208954
3_1	3_1_02.raw	sp|P05067|A4_HUMAN	P05067	ABETA	LVFFAEDVGSNK	C61H92N14O19[M+2H]	LVFFAEDVGSNK(+H2)	663.34	88.68	3498566517
3_2	3_2_02.raw	sp|P05067|A4_HUMAN	P05067	ABETA	LVFFAEDVGSNK	C61H92N14O19[M+2H]	LVFFAEDVGSNK(+H2)	663.34	88.68	3742821181
3_3	3_3_02.raw	sp|P05067|A4_HUMAN	P05067	ABETA	LVFFAEDVGSNK	C61H92N14O19[M+2H]	LVFFAEDVGSNK(+H2)	663.34	88.68	1377101415
4_1	4_1_02.raw	sp|P05067|A4_HUMAN	P05067	ABETA	LVFFAEDVGSNK	C61H92N14O19[M+2H]	LVFFAEDVGSNK(+H2)	663.34	88.68	7241439592
4_2	4_2_02.raw	sp|P05067|A4_HUMAN	P05067	ABETA	LVFFAEDVGSNK	C61H92N14O19[M+2H]	LVFFAEDVGSNK(+H2)	663.34	88.68	6884883979
4_3	4_3_02.raw	sp|P05067|A4_HUMAN	P05067	ABETA	LVFFAEDVGSNK	C61H92N14O19[M+2H]	LVFFAEDVGSNK(+H2)	663.34	88.68	4672305817
1_4	1_4_02.raw	sp|P05067|A4_HUMAN	P05067	ABETA	LVFFAEDVGSNK	C61H92N14O19[M+2H]	LVFFAEDVGSNK(+H2)	663.34	88.68	2.70044e+07
1_5	1_5_02.raw	sp|P05067|A4_HUMAN	P05067	ABETA	LVFFAEDVGSNK	C61H92N14O19[M+2H]	LVFFAEDVGSNK(+H2)	663.34	88.68	3.10818e+06
1_6	1_6_02.raw	sp|P05067|A4_HUMAN	P05067	ABETA	LVFFAEDVGSNK	C61H92N14O19[M+2H]	LVFFAEDVGSNK(+H2)	663.34	88.68	2.45258e+08
2_4	2_4_02.raw	sp|P05067|A4_HUMAN	P05067	ABETA	LVFFAEDVGSNK	C61H92N14O19[M+2H]	LVFFAEDVGSNK(+H2)	663.34	88.68	1.44033e+07
2_5	2_5_02.raw	sp|P05067|A4_HUMAN	P05067	ABETA	LVFFAEDVGSNK	C61H92N14O19[M+2H]	LVFFAEDVGSNK(+H2)	663.34	88.68	3.06599e+08
2_6	2_6_02.raw	sp|P05067|A4_HUMAN	P05067	ABETA	LVFFAEDVGSNK	C61H92N14O19[M+2H]	LVFFAEDVGSNK(+H2)	663.34	88.68	8.75323e+06
3_4	3_4_02.raw	sp|P05067|A4_HUMAN	P05067	ABETA	LVFFAEDVGSNK	C61H92N14O19[M+2H]	LVFFAEDVGSNK(+H2)	663.34	88.68	2.16006e+06
3_5	3_5_02.raw	sp|P05067|A4_HUMAN	P05067	ABETA	LVFFAEDVGSNK	C61H92N14O19[M+2H]	LVFFAEDVGSNK(+H2)	663.34	88.68	1.88374e+06
3_6	3_6_02.raw	sp|P05067|A4_HUMAN	P05067	ABETA	LVFFAEDVGSNK	C61H92N14O19[M+2H]	LVFFAEDVGSNK(+H2)	663.34	88.68	3.10342e+07
4_4	4_4_02.raw	sp|P05067|A4_HUMAN	P05067	ABETA	LVFFAEDVGSNK	C61H92N14O19[M+2H]	LVFFAEDVGSNK(+H2)	663.34	88.68	9.23606e+06
4_5	4_5_02.raw	sp|P05067|A4_HUMAN	P05067	ABETA	LVFFAEDVGSNK	C61H92N14O19[M+2H]	LVFFAEDVGSNK(+H2)	663.34	88.68	6.72547e+06
4_6	4_6_02.raw	sp|P05067|A4_HUMAN	P05067	ABETA	LVFFAEDVGSNK	C61H92N14O19[M+2H]	LVFFAEDVGSNK(+H2)	663.34	88.68	8.18583e+08
1_7	1_7_02.raw	sp|P05067|A4_HUMAN	P05067	ABETA	LVFFAEDVGSNK	C61H92N14O19[M+2H]	LVFFAEDVGSNK(+H2)	663.34	88.68	4.25528e+07
1_8	1_8_02.raw	sp|P05067|A4_HUMAN	P05067	ABETA	LVFFAEDVGSNK	C61H92N14O19[M+2H]	LVFFAEDVGSNK(+H2)	663.34	88.68	2.24935e+06
1_9	1_9_02.raw	sp|P05067|A4_HUMAN	P05067	ABETA	LVFFAEDVGSNK	C61H92N14O19[M+2H]	LVFFAEDVGSNK(+H2)	663.34	88.68	9.88644e+06
2_7	2_7_02.raw	sp|P05067|A4_HUMAN	P05067	ABETA	LVFFAEDVGSNK	C61H92N14O19[M+2H]	LVFFAEDVGSNK(+H2)	663.34	88.68	4.05506e+07
2_8	2_8_02.raw	sp|P05067|A4_HUMAN	P05067	ABETA	LVFFAEDVGSNK	C61H92N14O19[M+2H]	LVFFAEDVGSNK(+H2)	663.34	88.68	2.27423e+07
2_9	2_9_02_171217160937.raw	sp|P05067|A4_HUMAN	P05067	ABETA	LVFFAEDVGSNK	C61H92N14O19[M+2H]	LVFFAEDVGSNK(+H2)	663.34	88.68	2.89003e+06
3_7	3_7_02.raw	sp|P05067|A4_HUMAN	P05067	ABETA	LVFFAEDVGSNK	C61H92N14O19[M+2H]	LVFFAEDVGSNK(+H2)	663.34	88.68	3.39943e+06
3_8	3_8_02.raw	sp|P05067|A4_HUMAN	P05067	ABETA	LVFFAEDVGSNK	C61H92N14O19[M+2H]	LVFFAEDVGSNK(+H2)	663.34	88.68	1.2093e+06
3_9	3_9_02.raw	sp|P05067|A4_HUMAN	P05067	ABETA	LVFFAEDVGSNK	C61H92N14O19[M+2H]	LVFFAEDVGSNK(+H2)	663.34	88.68	3.16591e+06
4_7	4_7_02.raw	sp|P05067|A4_HUMAN	P05067	ABETA	LVFFAEDVGSNK	C61H92N14O19[M+2H]	LVFFAEDVGSNK(+H2)	663.34	88.68	4.40467e+08
4_8	4_8_02.raw	sp|P05067|A4_HUMAN	P05067	ABETA	LVFFAEDVGSNK	C61H92N14O19[M+2H]	LVFFAEDVGSNK(+H2)	663.34	88.68	3.67543e+06
4_9	4_9_02.raw	sp|P05067|A4_HUMAN	P05067	ABETA	LVFFAEDVGSNK	C61H92N14O19[M+2H]	LVFFAEDVGSNK(+H2)	663.34	88.68	5.35487e+06
1_10	1_10_02.raw	sp|P05067|A4_HUMAN	P05067	ABETA	LVFFAEDVGSNK	C61H92N14O19[M+2H]	LVFFAEDVGSNK(+H2)	663.34	88.68	7.50748e+08
1_11	1_11_02.raw	sp|P05067|A4_HUMAN	P05067	ABETA	LVFFAEDVGSNK	C61H92N14O19[M+2H]	LVFFAEDVGSNK(+H2)	663.34	88.68	2287368487
1_12	1_12_02.raw	sp|P05067|A4_HUMAN	P05067	ABETA	LVFFAEDVGSNK	C61H92N14O19[M+2H]	LVFFAEDVGSNK(+H2)	663.34	88.68	5059886594
2_10	2_10_02.raw	sp|P05067|A4_HUMAN	P05067	ABETA	LVFFAEDVGSNK	C61H92N14O19[M+2H]	LVFFAEDVGSNK(+H2)	663.34	88.68	2111462865
2_11	2_11_02.raw	sp|P05067|A4_HUMAN	P05067	ABETA	LVFFAEDVGSNK	C61H92N14O19[M+2H]	LVFFAEDVGSNK(+H2)	663.34	88.68	2583415848
2_12	2_12_02.raw	sp|P05067|A4_HUMAN	P05067	ABETA	LVFFAEDVGSNK	C61H92N14O19[M+2H]	LVFFAEDVGSNK(+H2)	663.34	88.68	688182886
3_10	3_10_02.raw	sp|P05067|A4_HUMAN	P05067	ABETA	LVFFAEDVGSNK	C61H92N14O19[M+2H]	LVFFAEDVGSNK(+H2)	663.34	88.68	2070681843
3_11	3_11_02.raw	sp|P05067|A4_HUMAN	P05067	ABETA	LVFFAEDVGSNK	C61H92N14O19[M+2H]	LVFFAEDVGSNK(+H2)	663.34	88.68	1000295139
Chromatograms	FinalList2_1.raw	peptides1		ABETA	DAEFR	C27H40N8O10[M+H]	DAEFR(+H1)	637.294	41.32
GPS01	GPS01_1.raw	peptides1		ABETA	DAEFR	C27H40N8O10[M+H]	DAEFR(+H1)	637.294	41.32	2.94235e+07
GPS02	GPS02_1.raw	peptides1		ABETA	DAEFR	C27H40N8O10[M+H]	DAEFR(+H1)	637.294	41.32	2.70269e+07
GPS03	GPS03_1.raw	peptides1		ABETA	DAEFR	C27H40N8O10[M+H]	DAEFR(+H1)	637.294	41.32	3.01776e+07
GPS04	GPS04_1.raw	peptides1		ABETA	DAEFR	C27H40N8O10[M+H]	DAEFR(+H1)	637.294	41.32	3.06423e+07
GPS05	GPS_05_01.raw	peptides1		ABETA	DAEFR	C27H40N8O10[M+H]	DAEFR(+H1)	637.294	41.32	6.82825e+07
GPS06	GPS_06_01.raw	peptides1		ABETA	DAEFR	C27H40N8O10[M+H]	DAEFR(+H1)	637.294	41.32	57711908
1_1	1_1_01.raw	peptides1		ABETA	DAEFR	C27H40N8O10[M+H]	DAEFR(+H1)	637.294	41.32	3.87449e+07
1_2	1_2_01.raw	peptides1		ABETA	DAEFR	C27H40N8O10[M+H]	DAEFR(+H1)	637.294	41.32	237750333
1_3	1_3_01.raw	peptides1		ABETA	DAEFR	C27H40N8O10[M+H]	DAEFR(+H1)	637.294	41.32	5.08297e+07
2_1	2_1_01.raw	peptides1		ABETA	DAEFR	C27H40N8O10[M+H]	DAEFR(+H1)	637.294	41.32	3.90181e+07
2_2	2_2_01.raw	peptides1		ABETA	DAEFR	C27H40N8O10[M+H]	DAEFR(+H1)	637.294	41.32	4.78892e+07
2_3	2_3_01.raw	peptides1		ABETA	DAEFR	C27H40N8O10[M+H]	DAEFR(+H1)	637.294	41.32	8.1684e+07
3_1	3_1_01.raw	peptides1		ABETA	DAEFR	C27H40N8O10[M+H]	DAEFR(+H1)	637.294	41.32	6.87631e+07
3_2	3_2_01_171223210221.raw	peptides1		ABETA	DAEFR	C27H40N8O10[M+H]	DAEFR(+H1)	637.294	41.32	7.24474e+07
3_3	3_3_01.raw	peptides1		ABETA	DAEFR	C27H40N8O10[M+H]	DAEFR(+H1)	637.294	41.32	2.37215e+07
4_1	4_1_01.raw	peptides1		ABETA	DAEFR	C27H40N8O10[M+H]	DAEFR(+H1)	637.294	41.32	2.37209e+07
4_2	4_2_01.raw	peptides1		ABETA	DAEFR	C27H40N8O10[M+H]	DAEFR(+H1)	637.294	41.32	1.34709e+08
4_3	4_3_01.raw	peptides1		ABETA	DAEFR	C27H40N8O10[M+H]	DAEFR(+H1)	637.294	41.32	1.28669e+08
1_4	1_4_01.raw	peptides1		ABETA	DAEFR	C27H40N8O10[M+H]	DAEFR(+H1)	637.294	41.32	284898
1_5	1_5_01.raw	peptides1		ABETA	DAEFR	C27H40N8O10[M+H]	DAEFR(+H1)	637.294	41.32	533963
1_6	1_6_01.raw	peptides1		ABETA	DAEFR	C27H40N8O10[M+H]	DAEFR(+H1)	637.294	41.32	5.86443e+06
2_4	2_4_01.raw	peptides1		ABETA	DAEFR	C27H40N8O10[M+H]	DAEFR(+H1)	637.294	41.32	800084
2_5	2_5_01.raw	peptides1		ABETA	DAEFR	C27H40N8O10[M+H]	DAEFR(+H1)	637.294	41.32	3.7759e+06
2_6	2_6_01.raw	peptides1		ABETA	DAEFR	C27H40N8O10[M+H]	DAEFR(+H1)	637.294	41.32	999482
3_4	3_4_01.raw	peptides1		ABETA	DAEFR	C27H40N8O10[M+H]	DAEFR(+H1)	637.294	41.32	557140
3_5	3_5_01.raw	peptides1		ABETA	DAEFR	C27H40N8O10[M+H]	DAEFR(+H1)	637.294	41.32	276223
3_6	3_6_01.raw	peptides1		ABETA	DAEFR	C27H40N8O10[M+H]	DAEFR(+H1)	637.294	41.32	1.1149e+06
4_4	4_4_01.raw	peptides1		ABETA	DAEFR	C27H40N8O10[M+H]	DAEFR(+H1)	637.294	41.32	567915
4_5	4_5_01.raw	peptides1		ABETA	DAEFR	C27H40N8O10[M+H]	DAEFR(+H1)	637.294	41.32	456266
4_6	4_6_01.raw	peptides1		ABETA	DAEFR	C27H40N8O10[M+H]	DAEFR(+H1)	637.294	41.32	1.82499e+07
1_7	1_7_01.raw	peptides1		ABETA	DAEFR	C27H40N8O10[M+H]	DAEFR(+H1)	637.294	41.32	649824
1_8	1_8_01_171211223541.raw	peptides1		ABETA	DAEFR	C27H40N8O10[M+H]	DAEFR(+H1)	637.294	41.32	279050
1_9	1_9_01.raw	peptides1		ABETA	DAEFR	C27H40N8O10[M+H]	DAEFR(+H1)	637.294	41.32	702703
2_7	2_7_01.raw	peptides1		ABETA	DAEFR	C27H40N8O10[M+H]	DAEFR(+H1)	637.294	41.32	849482
2_8	2_8_01.raw	peptides1		ABETA	DAEFR	C27H40N8O10[M+H]	DAEFR(+H1)	637.294	41.32	424229
2_9	2_9_01_171217123101.raw	peptides1		ABETA	DAEFR	C27H40N8O10[M+H]	DAEFR(+H1)	637.294	41.32	904612
3_7	3_7_01.raw	peptides1		ABETA	DAEFR	C27H40N8O10[M+H]	DAEFR(+H1)	637.294	41.32	479190
3_8	3_8_01.raw	peptides1		ABETA	DAEFR	C27H40N8O10[M+H]	DAEFR(+H1)	637.294	41.32	386240
3_9	3_9_01.raw	peptides1		ABETA	DAEFR	C27H40N8O10[M+H]	DAEFR(+H1)	637.294	41.32	732069
4_7	4_7_01.raw	peptides1		ABETA	DAEFR	C27H40N8O10[M+H]	DAEFR(+H1)	637.294	41.32	9.34047e+06
4_8	4_8_01.raw	peptides1		ABETA	DAEFR	C27H40N8O10[M+H]	DAEFR(+H1)	637.294	41.32	1.07781e+06
4_9	4_9_01.raw	peptides1		ABETA	DAEFR	C27H40N8O10[M+H]	DAEFR(+H1)	637.294	41.32	356856
1_10	1_10_01.raw	peptides1		ABETA	DAEFR	C27H40N8O10[M+H]	DAEFR(+H1)	637.294	41.32	1.58651e+07
1_11	1_11_01.raw	peptides1		ABETA	DAEFR	C27H40N8O10[M+H]	DAEFR(+H1)	637.294	41.32	4.22001e+07
1_12	1_12_01.raw	peptides1		ABETA	DAEFR	C27H40N8O10[M+H]	DAEFR(+H1)	637.294	41.32	1.11391e+08
2_10	2_10_01.raw	peptides1		ABETA	DAEFR	C27H40N8O10[M+H]	DAEFR(+H1)	637.294	41.32	5.8677e+07
2_11	2_11_01_171223040132.raw	peptides1		ABETA	DAEFR	C27H40N8O10[M+H]	DAEFR(+H1)	637.294	41.32	5.89319e+07
2_12	2_12_01.raw	peptides1		ABETA	DAEFR	C27H40N8O10[M+H]	DAEFR(+H1)	637.294	41.32	9.00325e+06
3_10	3_10_01.raw	peptides1		ABETA	DAEFR	C27H40N8O10[M+H]	DAEFR(+H1)	637.294	41.32	8.04747e+07
3_11	3_11_01.raw	peptides1		ABETA	DAEFR	C27H40N8O10[M+H]	DAEFR(+H1)	637.294	41.32	1.24115e+07
Chromatograms	FinalList2_2.raw	peptides1		ABETA	DAEFR	C27H40N8O10[M+2H]	DAEFR(+H2)	319.151	41.32
GPS01	GPS01_1.raw	peptides1		ABETA	DAEFR	C27H40N8O10[M+2H]	DAEFR(+H2)	319.151	41.32	176556124
GPS02	GPS02_1.raw	peptides1		ABETA	DAEFR	C27H40N8O10[M+2H]	DAEFR(+H2)	319.151	41.32	1.6449e+08
GPS03	GPS03_1.raw	peptides1		ABETA	DAEFR	C27H40N8O10[M+2H]	DAEFR(+H2)	319.151	41.32	1.55467e+08
GPS04	GPS04_1.raw	peptides1		ABETA	DAEFR	C27H40N8O10[M+2H]	DAEFR(+H2)	319.151	41.32	162622420
GPS05	GPS_05_01.raw	peptides1		ABETA	DAEFR	C27H40N8O10[M+2H]	DAEFR(+H2)	319.151	41.32	1.59908e+08
GPS06	GPS_06_01.raw	peptides1		ABETA	DAEFR	C27H40N8O10[M+2H]	DAEFR(+H2)	319.151	41.32	1.44193e+08
1_1	1_1_01.raw	peptides1		ABETA	DAEFR	C27H40N8O10[M+2H]	DAEFR(+H2)	319.151	41.32	2.54345e+08
1_2	1_2_01.raw	peptides1		ABETA	DAEFR	C27H40N8O10[M+2H]	DAEFR(+H2)	319.151	41.32	1100243028
1_3	1_3_01.raw	peptides1		ABETA	DAEFR	C27H40N8O10[M+2H]	DAEFR(+H2)	319.151	41.32	2.87888e+08
2_1	2_1_01.raw	peptides1		ABETA	DAEFR	C27H40N8O10[M+2H]	DAEFR(+H2)	319.151	41.32	2.03075e+08
2_2	2_2_01.raw	peptides1		ABETA	DAEFR	C27H40N8O10[M+2H]	DAEFR(+H2)	319.151	41.32	2.26256e+08
2_3	2_3_01.raw	peptides1		ABETA	DAEFR	C27H40N8O10[M+2H]	DAEFR(+H2)	319.151	41.32	4.09404e+08
3_1	3_1_01.raw	peptides1		ABETA	DAEFR	C27H40N8O10[M+2H]	DAEFR(+H2)	319.151	41.32	4.57724e+08
3_2	3_2_01_171223210221.raw	peptides1		ABETA	DAEFR	C27H40N8O10[M+2H]	DAEFR(+H2)	319.151	41.32	3.47472e+08
3_3	3_3_01.raw	peptides1		ABETA	DAEFR	C27H40N8O10[M+2H]	DAEFR(+H2)	319.151	41.32	1.29377e+08
4_1	4_1_01.raw	peptides1		ABETA	DAEFR	C27H40N8O10[M+2H]	DAEFR(+H2)	319.151	41.32	1.93621e+08
4_2	4_2_01.raw	peptides1		ABETA	DAEFR	C27H40N8O10[M+2H]	DAEFR(+H2)	319.151	41.32	3.74343e+08
4_3	4_3_01.raw	peptides1		ABETA	DAEFR	C27H40N8O10[M+2H]	DAEFR(+H2)	319.151	41.32	3.62136e+08
1_4	1_4_01.raw	peptides1		ABETA	DAEFR	C27H40N8O10[M+2H]	DAEFR(+H2)	319.151	41.32	8.21661e+06
1_5	1_5_01.raw	peptides1		ABETA	DAEFR	C27H40N8O10[M+2H]	DAEFR(+H2)	319.151	41.32	6.43692e+06
1_6	1_6_01.raw	peptides1		ABETA	DAEFR	C27H40N8O10[M+2H]	DAEFR(+H2)	319.151	41.32	3.22562e+07
2_4	2_4_01.raw	peptides1		ABETA	DAEFR	C27H40N8O10[M+2H]	DAEFR(+H2)	319.151	41.32	2.53203e+06
2_5	2_5_01.raw	peptides1		ABETA	DAEFR	C27H40N8O10[M+2H]	DAEFR(+H2)	319.151	41.32	1.92314e+07
2_6	2_6_01.raw	peptides1		ABETA	DAEFR	C27H40N8O10[M+2H]	DAEFR(+H2)	319.151	41.32	1.48807e+06
3_4	3_4_01.raw	peptides1		ABETA	DAEFR	C27H40N8O10[M+2H]	DAEFR(+H2)	319.151	41.32	2.30597e+06
3_5	3_5_01.raw	peptides1		ABETA	DAEFR	C27H40N8O10[M+2H]	DAEFR(+H2)	319.151	41.32	3.42198e+06
3_6	3_6_01.raw	peptides1		ABETA	DAEFR	C27H40N8O10[M+2H]	DAEFR(+H2)	319.151	41.32	2.3626e+06
4_4	4_4_01.raw	peptides1		ABETA	DAEFR	C27H40N8O10[M+2H]	DAEFR(+H2)	319.151	41.32	4.53116e+06
4_5	4_5_01.raw	peptides1		ABETA	DAEFR	C27H40N8O10[M+2H]	DAEFR(+H2)	319.151	41.32	4.79146e+06
4_6	4_6_01.raw	peptides1		ABETA	DAEFR	C27H40N8O10[M+2H]	DAEFR(+H2)	319.151	41.32	5.65528e+07
1_7	1_7_01.raw	peptides1		ABETA	DAEFR	C27H40N8O10[M+2H]	DAEFR(+H2)	319.151	41.32	8.87001e+06
1_8	1_8_01_171211223541.raw	peptides1		ABETA	DAEFR	C27H40N8O10[M+2H]	DAEFR(+H2)	319.151	41.32	5.48372e+06
1_9	1_9_01.raw	peptides1		ABETA	DAEFR	C27H40N8O10[M+2H]	DAEFR(+H2)	319.151	41.32	3.50303e+06
2_7	2_7_01.raw	peptides1		ABETA	DAEFR	C27H40N8O10[M+2H]	DAEFR(+H2)	319.151	41.32	4.62664e+06
2_8	2_8_01.raw	peptides1		ABETA	DAEFR	C27H40N8O10[M+2H]	DAEFR(+H2)	319.151	41.32	3.0231e+06
2_9	2_9_01_171217123101.raw	peptides1		ABETA	DAEFR	C27H40N8O10[M+2H]	DAEFR(+H2)	319.151	41.32	6.60513e+06
3_7	3_7_01.raw	peptides1		ABETA	DAEFR	C27H40N8O10[M+2H]	DAEFR(+H2)	319.151	41.32	8.06215e+06
3_8	3_8_01.raw	peptides1		ABETA	DAEFR	C27H40N8O10[M+2H]	DAEFR(+H2)	319.151	41.32	4.50009e+06
3_9	3_9_01.raw	peptides1		ABETA	DAEFR	C27H40N8O10[M+2H]	DAEFR(+H2)	319.151	41.32	6.03689e+06
4_7	4_7_01.raw	peptides1		ABETA	DAEFR	C27H40N8O10[M+2H]	DAEFR(+H2)	319.151	41.32	3.75587e+07
4_8	4_8_01.raw	peptides1		ABETA	DAEFR	C27H40N8O10[M+2H]	DAEFR(+H2)	319.151	41.32	7.19791e+06
4_9	4_9_01.raw	peptides1		ABETA	DAEFR	C27H40N8O10[M+2H]	DAEFR(+H2)	319.151	41.32	6.43726e+06
1_10	1_10_01.raw	peptides1		ABETA	DAEFR	C27H40N8O10[M+2H]	DAEFR(+H2)	319.151	41.32	7.89443e+07
1_11	1_11_01.raw	peptides1		ABETA	DAEFR	C27H40N8O10[M+2H]	DAEFR(+H2)	319.151	41.32	2.09099e+08
1_12	1_12_01.raw	peptides1		ABETA	DAEFR	C27H40N8O10[M+2H]	DAEFR(+H2)	319.151	41.32	6.21222e+08
2_10	2_10_01.raw	peptides1		ABETA	DAEFR	C27H40N8O10[M+2H]	DAEFR(+H2)	319.151	41.32	1.64899e+08
2_11	2_11_01_171223040132.raw	peptides1		ABETA	DAEFR	C27H40N8O10[M+2H]	DAEFR(+H2)	319.151	41.32	3.14846e+08
2_12	2_12_01.raw	peptides1		ABETA	DAEFR	C27H40N8O10[M+2H]	DAEFR(+H2)	319.151	41.32	4.72157e+07
3_10	3_10_01.raw	peptides1		ABETA	DAEFR	C27H40N8O10[M+2H]	DAEFR(+H2)	319.151	41.32	3.73466e+08
3_11	3_11_01.raw	peptides1		ABETA	DAEFR	C27H40N8O10[M+2H]	DAEFR(+H2)	319.151	41.32	4.6187e+07
Chromatograms	FinalList2_2.raw	peptides1		ABETA38	GAIIGLMVGG	C39H70N10O11S[M+H]	GAIIGLMVGG(+H1)	887.502	105.7
GPS01	GPS01_1.raw	peptides1		ABETA38	GAIIGLMVGG	C39H70N10O11S[M+H]	GAIIGLMVGG(+H1)	887.502	105.7	3.88474e+06
GPS02	GPS02_1.raw	peptides1		ABETA38	GAIIGLMVGG	C39H70N10O11S[M+H]	GAIIGLMVGG(+H1)	887.502	105.7	2.71531e+06
GPS03	GPS03_1.raw	peptides1		ABETA38	GAIIGLMVGG	C39H70N10O11S[M+H]	GAIIGLMVGG(+H1)	887.502	105.7	2.75259e+06
GPS04	GPS04_1.raw	peptides1		ABETA38	GAIIGLMVGG	C39H70N10O11S[M+H]	GAIIGLMVGG(+H1)	887.502	105.7	2.98423e+06
GPS05	GPS_05_01.raw	peptides1		ABETA38	GAIIGLMVGG	C39H70N10O11S[M+H]	GAIIGLMVGG(+H1)	887.502	105.7	6.00398e+06
GPS06	GPS_06_01.raw	peptides1		ABETA38	GAIIGLMVGG	C39H70N10O11S[M+H]	GAIIGLMVGG(+H1)	887.502	105.7	4.00907e+06
1_1	1_1_01.raw	peptides1		ABETA38	GAIIGLMVGG	C39H70N10O11S[M+H]	GAIIGLMVGG(+H1)	887.502	105.7	274547
1_2	1_2_01.raw	peptides1		ABETA38	GAIIGLMVGG	C39H70N10O11S[M+H]	GAIIGLMVGG(+H1)	887.502	105.7	6.77691e+07
1_3	1_3_01.raw	peptides1		ABETA38	GAIIGLMVGG	C39H70N10O11S[M+H]	GAIIGLMVGG(+H1)	887.502	105.7	107621
2_1	2_1_01.raw	peptides1		ABETA38	GAIIGLMVGG	C39H70N10O11S[M+H]	GAIIGLMVGG(+H1)	887.502	105.7	279918
2_2	2_2_01.raw	peptides1		ABETA38	GAIIGLMVGG	C39H70N10O11S[M+H]	GAIIGLMVGG(+H1)	887.502	105.7	18688.7
2_3	2_3_01.raw	peptides1		ABETA38	GAIIGLMVGG	C39H70N10O11S[M+H]	GAIIGLMVGG(+H1)	887.502	105.7	1.85374e+06
3_1	3_1_01.raw	peptides1		ABETA38	GAIIGLMVGG	C39H70N10O11S[M+H]	GAIIGLMVGG(+H1)	887.502	105.7	0
3_2	3_2_01_171223210221.raw	peptides1		ABETA38	GAIIGLMVGG	C39H70N10O11S[M+H]	GAIIGLMVGG(+H1)	887.502	105.7	425536
3_3	3_3_01.raw	peptides1		ABETA38	GAIIGLMVGG	C39H70N10O11S[M+H]	GAIIGLMVGG(+H1)	887.502	105.7	0
4_1	4_1_01.raw	peptides1		ABETA38	GAIIGLMVGG	C39H70N10O11S[M+H]	GAIIGLMVGG(+H1)	887.502	105.7	8476.31
4_2	4_2_01.raw	peptides1		ABETA38	GAIIGLMVGG	C39H70N10O11S[M+H]	GAIIGLMVGG(+H1)	887.502	105.7	6063.48
4_3	4_3_01.raw	peptides1		ABETA38	GAIIGLMVGG	C39H70N10O11S[M+H]	GAIIGLMVGG(+H1)	887.502	105.7	0
1_4	1_4_01.raw	peptides1		ABETA38	GAIIGLMVGG	C39H70N10O11S[M+H]	GAIIGLMVGG(+H1)	887.502	105.7	0
1_5	1_5_01.raw	peptides1		ABETA38	GAIIGLMVGG	C39H70N10O11S[M+H]	GAIIGLMVGG(+H1)	887.502	105.7	0
1_6	1_6_01.raw	peptides1		ABETA38	GAIIGLMVGG	C39H70N10O11S[M+H]	GAIIGLMVGG(+H1)	887.502	105.7	4173.05
2_4	2_4_01.raw	peptides1		ABETA38	GAIIGLMVGG	C39H70N10O11S[M+H]	GAIIGLMVGG(+H1)	887.502	105.7	0
2_5	2_5_01.raw	peptides1		ABETA38	GAIIGLMVGG	C39H70N10O11S[M+H]	GAIIGLMVGG(+H1)	887.502	105.7	0
2_6	2_6_01.raw	peptides1		ABETA38	GAIIGLMVGG	C39H70N10O11S[M+H]	GAIIGLMVGG(+H1)	887.502	105.7	0
3_4	3_4_01.raw	peptides1		ABETA38	GAIIGLMVGG	C39H70N10O11S[M+H]	GAIIGLMVGG(+H1)	887.502	105.7	0
3_5	3_5_01.raw	peptides1		ABETA38	GAIIGLMVGG	C39H70N10O11S[M+H]	GAIIGLMVGG(+H1)	887.502	105.7	0
3_6	3_6_01.raw	peptides1		ABETA38	GAIIGLMVGG	C39H70N10O11S[M+H]	GAIIGLMVGG(+H1)	887.502	105.7	0
4_4	4_4_01.raw	peptides1		ABETA38	GAIIGLMVGG	C39H70N10O11S[M+H]	GAIIGLMVGG(+H1)	887.502	105.7	52241.9
4_5	4_5_01.raw	peptides1		ABETA38	GAIIGLMVGG	C39H70N10O11S[M+H]	GAIIGLMVGG(+H1)	887.502	105.7	0
4_6	4_6_01.raw	peptides1		ABETA38	GAIIGLMVGG	C39H70N10O11S[M+H]	GAIIGLMVGG(+H1)	887.502	105.7	0
1_7	1_7_01.raw	peptides1		ABETA38	GAIIGLMVGG	C39H70N10O11S[M+H]	GAIIGLMVGG(+H1)	887.502	105.7	0
1_8	1_8_01_171211223541.raw	peptides1		ABETA38	GAIIGLMVGG	C39H70N10O11S[M+H]	GAIIGLMVGG(+H1)	887.502	105.7	0
1_9	1_9_01.raw	peptides1		ABETA38	GAIIGLMVGG	C39H70N10O11S[M+H]	GAIIGLMVGG(+H1)	887.502	105.7	0
2_7	2_7_01.raw	peptides1		ABETA38	GAIIGLMVGG	C39H70N10O11S[M+H]	GAIIGLMVGG(+H1)	887.502	105.7	0
2_8	2_8_01.raw	peptides1		ABETA38	GAIIGLMVGG	C39H70N10O11S[M+H]	GAIIGLMVGG(+H1)	887.502	105.7	0
2_9	2_9_01_171217123101.raw	peptides1		ABETA38	GAIIGLMVGG	C39H70N10O11S[M+H]	GAIIGLMVGG(+H1)	887.502	105.7	9812.67
3_7	3_7_01.raw	peptides1		ABETA38	GAIIGLMVGG	C39H70N10O11S[M+H]	GAIIGLMVGG(+H1)	887.502	105.7	0
3_8	3_8_01.raw	peptides1		ABETA38	GAIIGLMVGG	C39H70N10O11S[M+H]	GAIIGLMVGG(+H1)	887.502	105.7	0
3_9	3_9_01.raw	peptides1		ABETA38	GAIIGLMVGG	C39H70N10O11S[M+H]	GAIIGLMVGG(+H1)	887.502	105.7	0
4_7	4_7_01.raw	peptides1		ABETA38	GAIIGLMVGG	C39H70N10O11S[M+H]	GAIIGLMVGG(+H1)	887.502	105.7	0
4_8	4_8_01.raw	peptides1		ABETA38	GAIIGLMVGG	C39H70N10O11S[M+H]	GAIIGLMVGG(+H1)	887.502	105.7	2106.53
4_9	4_9_01.raw	peptides1		ABETA38	GAIIGLMVGG	C39H70N10O11S[M+H]	GAIIGLMVGG(+H1)	887.502	105.7	11133
1_10	1_10_01.raw	peptides1		ABETA38	GAIIGLMVGG	C39H70N10O11S[M+H]	GAIIGLMVGG(+H1)	887.502	105.7	0
1_11	1_11_01.raw	peptides1		ABETA38	GAIIGLMVGG	C39H70N10O11S[M+H]	GAIIGLMVGG(+H1)	887.502	105.7	849059
1_12	1_12_01.raw	peptides1		ABETA38	GAIIGLMVGG	C39H70N10O11S[M+H]	GAIIGLMVGG(+H1)	887.502	105.7	436851
2_10	2_10_01.raw	peptides1		ABETA38	GAIIGLMVGG	C39H70N10O11S[M+H]	GAIIGLMVGG(+H1)	887.502	105.7	823579
2_11	2_11_01_171223040132.raw	peptides1		ABETA38	GAIIGLMVGG	C39H70N10O11S[M+H]	GAIIGLMVGG(+H1)	887.502	105.7	54654.7
2_12	2_12_01.raw	peptides1		ABETA38	GAIIGLMVGG	C39H70N10O11S[M+H]	GAIIGLMVGG(+H1)	887.502	105.7	4912.11
3_10	3_10_01.raw	peptides1		ABETA38	GAIIGLMVGG	C39H70N10O11S[M+H]	GAIIGLMVGG(+H1)	887.502	105.7	0
3_11	3_11_01.raw	peptides1		ABETA38	GAIIGLMVGG	C39H70N10O11S[M+H]	GAIIGLMVGG(+H1)	887.502	105.7	0
Chromatograms	FinalList2_1.raw	peptides1		ABETA38	GAIIGLMVGG	C39H70N10O11S[M+2H]	GAIIGLMVGG(+H2)	444.255	105.7
GPS01	GPS01_1.raw	peptides1		ABETA38	GAIIGLMVGG	C39H70N10O11S[M+2H]	GAIIGLMVGG(+H2)	444.255	105.7	747485
GPS02	GPS02_1.raw	peptides1		ABETA38	GAIIGLMVGG	C39H70N10O11S[M+2H]	GAIIGLMVGG(+H2)	444.255	105.7	529478
GPS03	GPS03_1.raw	peptides1		ABETA38	GAIIGLMVGG	C39H70N10O11S[M+2H]	GAIIGLMVGG(+H2)	444.255	105.7	206690
GPS04	GPS04_1.raw	peptides1		ABETA38	GAIIGLMVGG	C39H70N10O11S[M+2H]	GAIIGLMVGG(+H2)	444.255	105.7	279236
GPS05	GPS_05_01.raw	peptides1		ABETA38	GAIIGLMVGG	C39H70N10O11S[M+2H]	GAIIGLMVGG(+H2)	444.255	105.7	637567
GPS06	GPS_06_01.raw	peptides1		ABETA38	GAIIGLMVGG	C39H70N10O11S[M+2H]	GAIIGLMVGG(+H2)	444.255	105.7	432033
1_1	1_1_01.raw	peptides1		ABETA38	GAIIGLMVGG	C39H70N10O11S[M+2H]	GAIIGLMVGG(+H2)	444.255	105.7	17386
1_2	1_2_01.raw	peptides1		ABETA38	GAIIGLMVGG	C39H70N10O11S[M+2H]	GAIIGLMVGG(+H2)	444.255	105.7	1.48196e+07
1_3	1_3_01.raw	peptides1		ABETA38	GAIIGLMVGG	C39H70N10O11S[M+2H]	GAIIGLMVGG(+H2)	444.255	105.7	2981.99
2_1	2_1_01.raw	peptides1		ABETA38	GAIIGLMVGG	C39H70N10O11S[M+2H]	GAIIGLMVGG(+H2)	444.255	105.7	106568
2_2	2_2_01.raw	peptides1		ABETA38	GAIIGLMVGG	C39H70N10O11S[M+2H]	GAIIGLMVGG(+H2)	444.255	105.7	0
2_3	2_3_01.raw	peptides1		ABETA38	GAIIGLMVGG	C39H70N10O11S[M+2H]	GAIIGLMVGG(+H2)	444.255	105.7	398321
3_1	3_1_01.raw	peptides1		ABETA38	GAIIGLMVGG	C39H70N10O11S[M+2H]	GAIIGLMVGG(+H2)	444.255	105.7	0
3_2	3_2_01_171223210221.raw	peptides1		ABETA38	GAIIGLMVGG	C39H70N10O11S[M+2H]	GAIIGLMVGG(+H2)	444.255	105.7	2909.71
3_3	3_3_01.raw	peptides1		ABETA38	GAIIGLMVGG	C39H70N10O11S[M+2H]	GAIIGLMVGG(+H2)	444.255	105.7	0
4_1	4_1_01.raw	peptides1		ABETA38	GAIIGLMVGG	C39H70N10O11S[M+2H]	GAIIGLMVGG(+H2)	444.255	105.7	6533.76
4_2	4_2_01.raw	peptides1		ABETA38	GAIIGLMVGG	C39H70N10O11S[M+2H]	GAIIGLMVGG(+H2)	444.255	105.7	0
4_3	4_3_01.raw	peptides1		ABETA38	GAIIGLMVGG	C39H70N10O11S[M+2H]	GAIIGLMVGG(+H2)	444.255	105.7	0
1_4	1_4_01.raw	peptides1		ABETA38	GAIIGLMVGG	C39H70N10O11S[M+2H]	GAIIGLMVGG(+H2)	444.255	105.7	0
1_5	1_5_01.raw	peptides1		ABETA38	GAIIGLMVGG	C39H70N10O11S[M+2H]	GAIIGLMVGG(+H2)	444.255	105.7	0
1_6	1_6_01.raw	peptides1		ABETA38	GAIIGLMVGG	C39H70N10O11S[M+2H]	GAIIGLMVGG(+H2)	444.255	105.7	0
2_4	2_4_01.raw	peptides1		ABETA38	GAIIGLMVGG	C39H70N10O11S[M+2H]	GAIIGLMVGG(+H2)	444.255	105.7	0
2_5	2_5_01.raw	peptides1		ABETA38	GAIIGLMVGG	C39H70N10O11S[M+2H]	GAIIGLMVGG(+H2)	444.255	105.7	0
2_6	2_6_01.raw	peptides1		ABETA38	GAIIGLMVGG	C39H70N10O11S[M+2H]	GAIIGLMVGG(+H2)	444.255	105.7	0
3_4	3_4_01.raw	peptides1		ABETA38	GAIIGLMVGG	C39H70N10O11S[M+2H]	GAIIGLMVGG(+H2)	444.255	105.7	0
3_5	3_5_01.raw	peptides1		ABETA38	GAIIGLMVGG	C39H70N10O11S[M+2H]	GAIIGLMVGG(+H2)	444.255	105.7	0
3_6	3_6_01.raw	peptides1		ABETA38	GAIIGLMVGG	C39H70N10O11S[M+2H]	GAIIGLMVGG(+H2)	444.255	105.7	0
4_4	4_4_01.raw	peptides1		ABETA38	GAIIGLMVGG	C39H70N10O11S[M+2H]	GAIIGLMVGG(+H2)	444.255	105.7	0
4_5	4_5_01.raw	peptides1		ABETA38	GAIIGLMVGG	C39H70N10O11S[M+2H]	GAIIGLMVGG(+H2)	444.255	105.7	0
4_6	4_6_01.raw	peptides1		ABETA38	GAIIGLMVGG	C39H70N10O11S[M+2H]	GAIIGLMVGG(+H2)	444.255	105.7	0
1_7	1_7_01.raw	peptides1		ABETA38	GAIIGLMVGG	C39H70N10O11S[M+2H]	GAIIGLMVGG(+H2)	444.255	105.7	0
1_8	1_8_01_171211223541.raw	peptides1		ABETA38	GAIIGLMVGG	C39H70N10O11S[M+2H]	GAIIGLMVGG(+H2)	444.255	105.7	0
1_9	1_9_01.raw	peptides1		ABETA38	GAIIGLMVGG	C39H70N10O11S[M+2H]	GAIIGLMVGG(+H2)	444.255	105.7	0
2_7	2_7_01.raw	peptides1		ABETA38	GAIIGLMVGG	C39H70N10O11S[M+2H]	GAIIGLMVGG(+H2)	444.255	105.7	0
2_8	2_8_01.raw	peptides1		ABETA38	GAIIGLMVGG	C39H70N10O11S[M+2H]	GAIIGLMVGG(+H2)	444.255	105.7	0
2_9	2_9_01_171217123101.raw	peptides1		ABETA38	GAIIGLMVGG	C39H70N10O11S[M+2H]	GAIIGLMVGG(+H2)	444.255	105.7	0
3_7	3_7_01.raw	peptides1		ABETA38	GAIIGLMVGG	C39H70N10O11S[M+2H]	GAIIGLMVGG(+H2)	444.255	105.7	0
3_8	3_8_01.raw	peptides1		ABETA38	GAIIGLMVGG	C39H70N10O11S[M+2H]	GAIIGLMVGG(+H2)	444.255	105.7	0
3_9	3_9_01.raw	peptides1		ABETA38	GAIIGLMVGG	C39H70N10O11S[M+2H]	GAIIGLMVGG(+H2)	444.255	105.7	0
4_7	4_7_01.raw	peptides1		ABETA38	GAIIGLMVGG	C39H70N10O11S[M+2H]	GAIIGLMVGG(+H2)	444.255	105.7	0
4_8	4_8_01.raw	peptides1		ABETA38	GAIIGLMVGG	C39H70N10O11S[M+2H]	GAIIGLMVGG(+H2)	444.255	105.7	0
4_9	4_9_01.raw	peptides1		ABETA38	GAIIGLMVGG	C39H70N10O11S[M+2H]	GAIIGLMVGG(+H2)	444.255	105.7	0
1_10	1_10_01.raw	peptides1		ABETA38	GAIIGLMVGG	C39H70N10O11S[M+2H]	GAIIGLMVGG(+H2)	444.255	105.7	0
1_11	1_11_01.raw	peptides1		ABETA38	GAIIGLMVGG	C39H70N10O11S[M+2H]	GAIIGLMVGG(+H2)	444.255	105.7	329910
1_12	1_12_01.raw	peptides1		ABETA38	GAIIGLMVGG	C39H70N10O11S[M+2H]	GAIIGLMVGG(+H2)	444.255	105.7	172894
2_10	2_10_01.raw	peptides1		ABETA38	GAIIGLMVGG	C39H70N10O11S[M+2H]	GAIIGLMVGG(+H2)	444.255	105.7	166490
2_11	2_11_01_171223040132.raw	peptides1		ABETA38	GAIIGLMVGG	C39H70N10O11S[M+2H]	GAIIGLMVGG(+H2)	444.255	105.7	0
2_12	2_12_01.raw	peptides1		ABETA38	GAIIGLMVGG	C39H70N10O11S[M+2H]	GAIIGLMVGG(+H2)	444.255	105.7	0
3_10	3_10_01.raw	peptides1		ABETA38	GAIIGLMVGG	C39H70N10O11S[M+2H]	GAIIGLMVGG(+H2)	444.255	105.7	0
3_11	3_11_01.raw	peptides1		ABETA38	GAIIGLMVGG	C39H70N10O11S[M+2H]	GAIIGLMVGG(+H2)	444.255	105.7	0
Chromatograms	FinalList2_1.raw	peptides1		ABETA40	GAIIGLMVGGVV	C49H88N12O13S[M+H]	GAIIGLMVGGVV(+H1)	1085.64	126.12
GPS01	GPS01_2.raw	peptides1		ABETA40	GAIIGLMVGGVV	C49H88N12O13S[M+H]	GAIIGLMVGGVV(+H1)	1085.64	126.12	5.66759e+06
GPS02	GPS02_2.raw	peptides1		ABETA40	GAIIGLMVGGVV	C49H88N12O13S[M+H]	GAIIGLMVGGVV(+H1)	1085.64	126.12	3.00588e+06
GPS03	GPS03_2.raw	peptides1		ABETA40	GAIIGLMVGGVV	C49H88N12O13S[M+H]	GAIIGLMVGGVV(+H1)	1085.64	126.12	2.73428e+06
GPS04	GPS04_2.raw	peptides1		ABETA40	GAIIGLMVGGVV	C49H88N12O13S[M+H]	GAIIGLMVGGVV(+H1)	1085.64	126.12	6.74669e+06
GPS05	GPS_05_02.raw	peptides1		ABETA40	GAIIGLMVGGVV	C49H88N12O13S[M+H]	GAIIGLMVGGVV(+H1)	1085.64	126.12	539531
GPS06	GPS_06_02.raw	peptides1		ABETA40	GAIIGLMVGGVV	C49H88N12O13S[M+H]	GAIIGLMVGGVV(+H1)	1085.64	126.12	116726
1_1	1_1_02.raw	peptides1		ABETA40	GAIIGLMVGGVV	C49H88N12O13S[M+H]	GAIIGLMVGGVV(+H1)	1085.64	126.12	9.30191e+06
1_2	1_2_02.raw	peptides1		ABETA40	GAIIGLMVGGVV	C49H88N12O13S[M+H]	GAIIGLMVGGVV(+H1)	1085.64	126.12	4.02105e+07
1_3	1_3_02.raw	peptides1		ABETA40	GAIIGLMVGGVV	C49H88N12O13S[M+H]	GAIIGLMVGGVV(+H1)	1085.64	126.12	1.61893e+06
2_1	2_1_02.raw	peptides1		ABETA40	GAIIGLMVGGVV	C49H88N12O13S[M+H]	GAIIGLMVGGVV(+H1)	1085.64	126.12	5.61484e+06
2_2	2_2_02.raw	peptides1		ABETA40	GAIIGLMVGGVV	C49H88N12O13S[M+H]	GAIIGLMVGGVV(+H1)	1085.64	126.12	282609
2_3	2_3_02.raw	peptides1		ABETA40	GAIIGLMVGGVV	C49H88N12O13S[M+H]	GAIIGLMVGGVV(+H1)	1085.64	126.12	2.41919e+07
3_1	3_1_02.raw	peptides1		ABETA40	GAIIGLMVGGVV	C49H88N12O13S[M+H]	GAIIGLMVGGVV(+H1)	1085.64	126.12	34119
3_2	3_2_02.raw	peptides1		ABETA40	GAIIGLMVGGVV	C49H88N12O13S[M+H]	GAIIGLMVGGVV(+H1)	1085.64	126.12	5.68179e+06
3_3	3_3_02.raw	peptides1		ABETA40	GAIIGLMVGGVV	C49H88N12O13S[M+H]	GAIIGLMVGGVV(+H1)	1085.64	126.12	155370
4_1	4_1_02.raw	peptides1		ABETA40	GAIIGLMVGGVV	C49H88N12O13S[M+H]	GAIIGLMVGGVV(+H1)	1085.64	126.12	4.58684e+07
4_2	4_2_02.raw	peptides1		ABETA40	GAIIGLMVGGVV	C49H88N12O13S[M+H]	GAIIGLMVGGVV(+H1)	1085.64	126.12	2.05115e+07
4_3	4_3_02.raw	peptides1		ABETA40	GAIIGLMVGGVV	C49H88N12O13S[M+H]	GAIIGLMVGGVV(+H1)	1085.64	126.12	6.45985e+06
1_4	1_4_02.raw	peptides1		ABETA40	GAIIGLMVGGVV	C49H88N12O13S[M+H]	GAIIGLMVGGVV(+H1)	1085.64	126.12	9960.79
1_5	1_5_02.raw	peptides1		ABETA40	GAIIGLMVGGVV	C49H88N12O13S[M+H]	GAIIGLMVGGVV(+H1)	1085.64	126.12	1580.35
1_6	1_6_02.raw	peptides1		ABETA40	GAIIGLMVGGVV	C49H88N12O13S[M+H]	GAIIGLMVGGVV(+H1)	1085.64	126.12	15853.3
2_4	2_4_02.raw	peptides1		ABETA40	GAIIGLMVGGVV	C49H88N12O13S[M+H]	GAIIGLMVGGVV(+H1)	1085.64	126.12	1946.3
2_5	2_5_02.raw	peptides1		ABETA40	GAIIGLMVGGVV	C49H88N12O13S[M+H]	GAIIGLMVGGVV(+H1)	1085.64	126.12	79255.4
2_6	2_6_02.raw	peptides1		ABETA40	GAIIGLMVGGVV	C49H88N12O13S[M+H]	GAIIGLMVGGVV(+H1)	1085.64	126.12	3260.65
3_4	3_4_02.raw	peptides1		ABETA40	GAIIGLMVGGVV	C49H88N12O13S[M+H]	GAIIGLMVGGVV(+H1)	1085.64	126.12	0
3_5	3_5_02.raw	peptides1		ABETA40	GAIIGLMVGGVV	C49H88N12O13S[M+H]	GAIIGLMVGGVV(+H1)	1085.64	126.12	1570.67
3_6	3_6_02.raw	peptides1		ABETA40	GAIIGLMVGGVV	C49H88N12O13S[M+H]	GAIIGLMVGGVV(+H1)	1085.64	126.12	2299.71
4_4	4_4_02.raw	peptides1		ABETA40	GAIIGLMVGGVV	C49H88N12O13S[M+H]	GAIIGLMVGGVV(+H1)	1085.64	126.12	0
4_5	4_5_02.raw	peptides1		ABETA40	GAIIGLMVGGVV	C49H88N12O13S[M+H]	GAIIGLMVGGVV(+H1)	1085.64	126.12	0
4_6	4_6_02.raw	peptides1		ABETA40	GAIIGLMVGGVV	C49H88N12O13S[M+H]	GAIIGLMVGGVV(+H1)	1085.64	126.12	0
1_7	1_7_02.raw	peptides1		ABETA40	GAIIGLMVGGVV	C49H88N12O13S[M+H]	GAIIGLMVGGVV(+H1)	1085.64	126.12	0
1_8	1_8_02.raw	peptides1		ABETA40	GAIIGLMVGGVV	C49H88N12O13S[M+H]	GAIIGLMVGGVV(+H1)	1085.64	126.12	1838.78
1_9	1_9_02.raw	peptides1		ABETA40	GAIIGLMVGGVV	C49H88N12O13S[M+H]	GAIIGLMVGGVV(+H1)	1085.64	126.12	0
2_7	2_7_02.raw	peptides1		ABETA40	GAIIGLMVGGVV	C49H88N12O13S[M+H]	GAIIGLMVGGVV(+H1)	1085.64	126.12	30033.7
2_8	2_8_02.raw	peptides1		ABETA40	GAIIGLMVGGVV	C49H88N12O13S[M+H]	GAIIGLMVGGVV(+H1)	1085.64	126.12	18280.6
2_9	2_9_02_171217160937.raw	peptides1		ABETA40	GAIIGLMVGGVV	C49H88N12O13S[M+H]	GAIIGLMVGGVV(+H1)	1085.64	126.12	5509.85
3_7	3_7_02.raw	peptides1		ABETA40	GAIIGLMVGGVV	C49H88N12O13S[M+H]	GAIIGLMVGGVV(+H1)	1085.64	126.12	1982.18
3_8	3_8_02.raw	peptides1		ABETA40	GAIIGLMVGGVV	C49H88N12O13S[M+H]	GAIIGLMVGGVV(+H1)	1085.64	126.12	0
3_9	3_9_02.raw	peptides1		ABETA40	GAIIGLMVGGVV	C49H88N12O13S[M+H]	GAIIGLMVGGVV(+H1)	1085.64	126.12	5007.54
4_7	4_7_02.raw	peptides1		ABETA40	GAIIGLMVGGVV	C49H88N12O13S[M+H]	GAIIGLMVGGVV(+H1)	1085.64	126.12	0
4_8	4_8_02.raw	peptides1		ABETA40	GAIIGLMVGGVV	C49H88N12O13S[M+H]	GAIIGLMVGGVV(+H1)	1085.64	126.12	0
4_9	4_9_02.raw	peptides1		ABETA40	GAIIGLMVGGVV	C49H88N12O13S[M+H]	GAIIGLMVGGVV(+H1)	1085.64	126.12	0
1_10	1_10_02.raw	peptides1		ABETA40	GAIIGLMVGGVV	C49H88N12O13S[M+H]	GAIIGLMVGGVV(+H1)	1085.64	126.12	7274.66
1_11	1_11_02.raw	peptides1		ABETA40	GAIIGLMVGGVV	C49H88N12O13S[M+H]	GAIIGLMVGGVV(+H1)	1085.64	126.12	9.3832e+06
1_12	1_12_02.raw	peptides1		ABETA40	GAIIGLMVGGVV	C49H88N12O13S[M+H]	GAIIGLMVGGVV(+H1)	1085.64	126.12	470131
2_10	2_10_02.raw	peptides1		ABETA40	GAIIGLMVGGVV	C49H88N12O13S[M+H]	GAIIGLMVGGVV(+H1)	1085.64	126.12	4.80885e+06
2_11	2_11_02.raw	peptides1		ABETA40	GAIIGLMVGGVV	C49H88N12O13S[M+H]	GAIIGLMVGGVV(+H1)	1085.64	126.12	407146
2_12	2_12_02.raw	peptides1		ABETA40	GAIIGLMVGGVV	C49H88N12O13S[M+H]	GAIIGLMVGGVV(+H1)	1085.64	126.12	4784.76
3_10	3_10_02.raw	peptides1		ABETA40	GAIIGLMVGGVV	C49H88N12O13S[M+H]	GAIIGLMVGGVV(+H1)	1085.64	126.12	0
3_11	3_11_02.raw	peptides1		ABETA40	GAIIGLMVGGVV	C49H88N12O13S[M+H]	GAIIGLMVGGVV(+H1)	1085.64	126.12	0
Chromatograms	FinalList2_2.raw	peptides1		ABETA40	GAIIGLMVGGVV	C49H88N12O13S[M+2H]	GAIIGLMVGGVV(+H2)	543.323	126.12
GPS01	GPS01_1.raw	peptides1		ABETA40	GAIIGLMVGGVV	C49H88N12O13S[M+2H]	GAIIGLMVGGVV(+H2)	543.323	126.12	2.32314e+07
GPS02	GPS02_1.raw	peptides1		ABETA40	GAIIGLMVGGVV	C49H88N12O13S[M+2H]	GAIIGLMVGGVV(+H2)	543.323	126.12	1.81841e+07
GPS03	GPS03_1.raw	peptides1		ABETA40	GAIIGLMVGGVV	C49H88N12O13S[M+2H]	GAIIGLMVGGVV(+H2)	543.323	126.12	1.44774e+07
GPS04	GPS04_1.raw	peptides1		ABETA40	GAIIGLMVGGVV	C49H88N12O13S[M+2H]	GAIIGLMVGGVV(+H2)	543.323	126.12	1.24454e+07
GPS05	GPS_05_01.raw	peptides1		ABETA40	GAIIGLMVGGVV	C49H88N12O13S[M+2H]	GAIIGLMVGGVV(+H2)	543.323	126.12	7.70902e+06
GPS06	GPS_06_01.raw	peptides1		ABETA40	GAIIGLMVGGVV	C49H88N12O13S[M+2H]	GAIIGLMVGGVV(+H2)	543.323	126.12	2.64447e+06
1_1	1_1_01.raw	peptides1		ABETA40	GAIIGLMVGGVV	C49H88N12O13S[M+2H]	GAIIGLMVGGVV(+H2)	543.323	126.12	4.23283e+07
1_2	1_2_01.raw	peptides1		ABETA40	GAIIGLMVGGVV	C49H88N12O13S[M+2H]	GAIIGLMVGGVV(+H2)	543.323	126.12	1.95014e+08
1_3	1_3_01.raw	peptides1		ABETA40	GAIIGLMVGGVV	C49H88N12O13S[M+2H]	GAIIGLMVGGVV(+H2)	543.323	126.12	1.15138e+07
2_1	2_1_01.raw	peptides1		ABETA40	GAIIGLMVGGVV	C49H88N12O13S[M+2H]	GAIIGLMVGGVV(+H2)	543.323	126.12	2.23914e+07
2_2	2_2_01.raw	peptides1		ABETA40	GAIIGLMVGGVV	C49H88N12O13S[M+2H]	GAIIGLMVGGVV(+H2)	543.323	126.12	1.63294e+06
2_3	2_3_01.raw	peptides1		ABETA40	GAIIGLMVGGVV	C49H88N12O13S[M+2H]	GAIIGLMVGGVV(+H2)	543.323	126.12	8.45982e+07
3_1	3_1_01.raw	peptides1		ABETA40	GAIIGLMVGGVV	C49H88N12O13S[M+2H]	GAIIGLMVGGVV(+H2)	543.323	126.12	191899
3_2	3_2_01_171223210221.raw	peptides1		ABETA40	GAIIGLMVGGVV	C49H88N12O13S[M+2H]	GAIIGLMVGGVV(+H2)	543.323	126.12	3.01057e+07
3_3	3_3_01.raw	peptides1		ABETA40	GAIIGLMVGGVV	C49H88N12O13S[M+2H]	GAIIGLMVGGVV(+H2)	543.323	126.12	1.46928e+06
4_1	4_1_01.raw	peptides1		ABETA40	GAIIGLMVGGVV	C49H88N12O13S[M+2H]	GAIIGLMVGGVV(+H2)	543.323	126.12	6.26742e+06
4_2	4_2_01.raw	peptides1		ABETA40	GAIIGLMVGGVV	C49H88N12O13S[M+2H]	GAIIGLMVGGVV(+H2)	543.323	126.12	4.46792e+07
4_3	4_3_01.raw	peptides1		ABETA40	GAIIGLMVGGVV	C49H88N12O13S[M+2H]	GAIIGLMVGGVV(+H2)	543.323	126.12	1.55668e+07
1_4	1_4_01.raw	peptides1		ABETA40	GAIIGLMVGGVV	C49H88N12O13S[M+2H]	GAIIGLMVGGVV(+H2)	543.323	126.12	167475
1_5	1_5_01.raw	peptides1		ABETA40	GAIIGLMVGGVV	C49H88N12O13S[M+2H]	GAIIGLMVGGVV(+H2)	543.323	126.12	78077.5
1_6	1_6_01.raw	peptides1		ABETA40	GAIIGLMVGGVV	C49H88N12O13S[M+2H]	GAIIGLMVGGVV(+H2)	543.323	126.12	536842
2_4	2_4_01.raw	peptides1		ABETA40	GAIIGLMVGGVV	C49H88N12O13S[M+2H]	GAIIGLMVGGVV(+H2)	543.323	126.12	304019
2_5	2_5_01.raw	peptides1		ABETA40	GAIIGLMVGGVV	C49H88N12O13S[M+2H]	GAIIGLMVGGVV(+H2)	543.323	126.12	1.00731e+06
2_6	2_6_01.raw	peptides1		ABETA40	GAIIGLMVGGVV	C49H88N12O13S[M+2H]	GAIIGLMVGGVV(+H2)	543.323	126.12	198192
3_4	3_4_01.raw	peptides1		ABETA40	GAIIGLMVGGVV	C49H88N12O13S[M+2H]	GAIIGLMVGGVV(+H2)	543.323	126.12	207765
3_5	3_5_01.raw	peptides1		ABETA40	GAIIGLMVGGVV	C49H88N12O13S[M+2H]	GAIIGLMVGGVV(+H2)	543.323	126.12	133563
3_6	3_6_01.raw	peptides1		ABETA40	GAIIGLMVGGVV	C49H88N12O13S[M+2H]	GAIIGLMVGGVV(+H2)	543.323	126.12	131240
4_4	4_4_01.raw	peptides1		ABETA40	GAIIGLMVGGVV	C49H88N12O13S[M+2H]	GAIIGLMVGGVV(+H2)	543.323	126.12	1.08609e+06
4_5	4_5_01.raw	peptides1		ABETA40	GAIIGLMVGGVV	C49H88N12O13S[M+2H]	GAIIGLMVGGVV(+H2)	543.323	126.12	431484
4_6	4_6_01.raw	peptides1		ABETA40	GAIIGLMVGGVV	C49H88N12O13S[M+2H]	GAIIGLMVGGVV(+H2)	543.323	126.12	790305
1_7	1_7_01.raw	peptides1		ABETA40	GAIIGLMVGGVV	C49H88N12O13S[M+2H]	GAIIGLMVGGVV(+H2)	543.323	126.12	50101.2
1_8	1_8_01_171211223541.raw	peptides1		ABETA40	GAIIGLMVGGVV	C49H88N12O13S[M+2H]	GAIIGLMVGGVV(+H2)	543.323	126.12	26265.2
1_9	1_9_01.raw	peptides1		ABETA40	GAIIGLMVGGVV	C49H88N12O13S[M+2H]	GAIIGLMVGGVV(+H2)	543.323	126.12	14088.5
2_7	2_7_01.raw	peptides1		ABETA40	GAIIGLMVGGVV	C49H88N12O13S[M+2H]	GAIIGLMVGGVV(+H2)	543.323	126.12	92926.7
2_8	2_8_01.raw	peptides1		ABETA40	GAIIGLMVGGVV	C49H88N12O13S[M+2H]	GAIIGLMVGGVV(+H2)	543.323	126.12	128144
2_9	2_9_01_171217123101.raw	peptides1		ABETA40	GAIIGLMVGGVV	C49H88N12O13S[M+2H]	GAIIGLMVGGVV(+H2)	543.323	126.12	139461
3_7	3_7_01.raw	peptides1		ABETA40	GAIIGLMVGGVV	C49H88N12O13S[M+2H]	GAIIGLMVGGVV(+H2)	543.323	126.12	212508
3_8	3_8_01.raw	peptides1		ABETA40	GAIIGLMVGGVV	C49H88N12O13S[M+2H]	GAIIGLMVGGVV(+H2)	543.323	126.12	246949
3_9	3_9_01.raw	peptides1		ABETA40	GAIIGLMVGGVV	C49H88N12O13S[M+2H]	GAIIGLMVGGVV(+H2)	543.323	126.12	222207
4_7	4_7_01.raw	peptides1		ABETA40	GAIIGLMVGGVV	C49H88N12O13S[M+2H]	GAIIGLMVGGVV(+H2)	543.323	126.12	165345
4_8	4_8_01.raw	peptides1		ABETA40	GAIIGLMVGGVV	C49H88N12O13S[M+2H]	GAIIGLMVGGVV(+H2)	543.323	126.12	370654
4_9	4_9_01.raw	peptides1		ABETA40	GAIIGLMVGGVV	C49H88N12O13S[M+2H]	GAIIGLMVGGVV(+H2)	543.323	126.12	339097
1_10	1_10_01.raw	peptides1		ABETA40	GAIIGLMVGGVV	C49H88N12O13S[M+2H]	GAIIGLMVGGVV(+H2)	543.323	126.12	631379
1_11	1_11_01.raw	peptides1		ABETA40	GAIIGLMVGGVV	C49H88N12O13S[M+2H]	GAIIGLMVGGVV(+H2)	543.323	126.12	4.8517e+07
1_12	1_12_01.raw	peptides1		ABETA40	GAIIGLMVGGVV	C49H88N12O13S[M+2H]	GAIIGLMVGGVV(+H2)	543.323	126.12	5.73583e+06
2_10	2_10_01.raw	peptides1		ABETA40	GAIIGLMVGGVV	C49H88N12O13S[M+2H]	GAIIGLMVGGVV(+H2)	543.323	126.12	2.51345e+07
2_11	2_11_01_171223040132.raw	peptides1		ABETA40	GAIIGLMVGGVV	C49H88N12O13S[M+2H]	GAIIGLMVGGVV(+H2)	543.323	126.12	2.61087e+06
2_12	2_12_01.raw	peptides1		ABETA40	GAIIGLMVGGVV	C49H88N12O13S[M+2H]	GAIIGLMVGGVV(+H2)	543.323	126.12	104221
3_10	3_10_01.raw	peptides1		ABETA40	GAIIGLMVGGVV	C49H88N12O13S[M+2H]	GAIIGLMVGGVV(+H2)	543.323	126.12	438618
3_11	3_11_01.raw	peptides1		ABETA40	GAIIGLMVGGVV	C49H88N12O13S[M+2H]	GAIIGLMVGGVV(+H2)	543.323	126.12	935496
Chromatograms	FinalList2_1.raw	peptides1		ABETA42	GAIIGLMVGGVVIA	C58H104N14O15S[M+H]	GAIIGLMVGGVVIA(+H1)	1269.76	138.88
GPS01	GPS01_2.raw	peptides1		ABETA42	GAIIGLMVGGVVIA	C58H104N14O15S[M+H]	GAIIGLMVGGVVIA(+H1)	1269.76	138.88	1.12936e+07
GPS02	GPS02_2.raw	peptides1		ABETA42	GAIIGLMVGGVVIA	C58H104N14O15S[M+H]	GAIIGLMVGGVVIA(+H1)	1269.76	138.88	3.72034e+06
GPS03	GPS03_2.raw	peptides1		ABETA42	GAIIGLMVGGVVIA	C58H104N14O15S[M+H]	GAIIGLMVGGVVIA(+H1)	1269.76	138.88	5.87285e+06
GPS04	GPS04_2.raw	peptides1		ABETA42	GAIIGLMVGGVVIA	C58H104N14O15S[M+H]	GAIIGLMVGGVVIA(+H1)	1269.76	138.88	1.27359e+07
GPS05	GPS_05_02.raw	peptides1		ABETA42	GAIIGLMVGGVVIA	C58H104N14O15S[M+H]	GAIIGLMVGGVVIA(+H1)	1269.76	138.88	2.57781e+07
GPS06	GPS_06_02.raw	peptides1		ABETA42	GAIIGLMVGGVVIA	C58H104N14O15S[M+H]	GAIIGLMVGGVVIA(+H1)	1269.76	138.88	8.26366e+06
1_1	1_1_02.raw	peptides1		ABETA42	GAIIGLMVGGVVIA	C58H104N14O15S[M+H]	GAIIGLMVGGVVIA(+H1)	1269.76	138.88	1.98076e+07
1_2	1_2_02.raw	peptides1		ABETA42	GAIIGLMVGGVVIA	C58H104N14O15S[M+H]	GAIIGLMVGGVVIA(+H1)	1269.76	138.88	2.25338e+07
1_3	1_3_02.raw	peptides1		ABETA42	GAIIGLMVGGVVIA	C58H104N14O15S[M+H]	GAIIGLMVGGVVIA(+H1)	1269.76	138.88	1.00671e+07
2_1	2_1_02.raw	peptides1		ABETA42	GAIIGLMVGGVVIA	C58H104N14O15S[M+H]	GAIIGLMVGGVVIA(+H1)	1269.76	138.88	1.10118e+07
2_2	2_2_02.raw	peptides1		ABETA42	GAIIGLMVGGVVIA	C58H104N14O15S[M+H]	GAIIGLMVGGVVIA(+H1)	1269.76	138.88	1.72519e+07
2_3	2_3_02.raw	peptides1		ABETA42	GAIIGLMVGGVVIA	C58H104N14O15S[M+H]	GAIIGLMVGGVVIA(+H1)	1269.76	138.88	2.95039e+07
3_1	3_1_02.raw	peptides1		ABETA42	GAIIGLMVGGVVIA	C58H104N14O15S[M+H]	GAIIGLMVGGVVIA(+H1)	1269.76	138.88	1.61768e+06
3_2	3_2_02.raw	peptides1		ABETA42	GAIIGLMVGGVVIA	C58H104N14O15S[M+H]	GAIIGLMVGGVVIA(+H1)	1269.76	138.88	3.14993e+06
3_3	3_3_02.raw	peptides1		ABETA42	GAIIGLMVGGVVIA	C58H104N14O15S[M+H]	GAIIGLMVGGVVIA(+H1)	1269.76	138.88	391767
4_1	4_1_02.raw	peptides1		ABETA42	GAIIGLMVGGVVIA	C58H104N14O15S[M+H]	GAIIGLMVGGVVIA(+H1)	1269.76	138.88	4.05728e+07
4_2	4_2_02.raw	peptides1		ABETA42	GAIIGLMVGGVVIA	C58H104N14O15S[M+H]	GAIIGLMVGGVVIA(+H1)	1269.76	138.88	3.06274e+07
4_3	4_3_02.raw	peptides1		ABETA42	GAIIGLMVGGVVIA	C58H104N14O15S[M+H]	GAIIGLMVGGVVIA(+H1)	1269.76	138.88	3.35814e+07
1_4	1_4_02.raw	peptides1		ABETA42	GAIIGLMVGGVVIA	C58H104N14O15S[M+H]	GAIIGLMVGGVVIA(+H1)	1269.76	138.88	33468.3
1_5	1_5_02.raw	peptides1		ABETA42	GAIIGLMVGGVVIA	C58H104N14O15S[M+H]	GAIIGLMVGGVVIA(+H1)	1269.76	138.88	122422
1_6	1_6_02.raw	peptides1		ABETA42	GAIIGLMVGGVVIA	C58H104N14O15S[M+H]	GAIIGLMVGGVVIA(+H1)	1269.76	138.88	359537
2_4	2_4_02.raw	peptides1		ABETA42	GAIIGLMVGGVVIA	C58H104N14O15S[M+H]	GAIIGLMVGGVVIA(+H1)	1269.76	138.88	504063
2_5	2_5_02.raw	peptides1		ABETA42	GAIIGLMVGGVVIA	C58H104N14O15S[M+H]	GAIIGLMVGGVVIA(+H1)	1269.76	138.88	939976
2_6	2_6_02.raw	peptides1		ABETA42	GAIIGLMVGGVVIA	C58H104N14O15S[M+H]	GAIIGLMVGGVVIA(+H1)	1269.76	138.88	378721
3_4	3_4_02.raw	peptides1		ABETA42	GAIIGLMVGGVVIA	C58H104N14O15S[M+H]	GAIIGLMVGGVVIA(+H1)	1269.76	138.88	17310.9
3_5	3_5_02.raw	peptides1		ABETA42	GAIIGLMVGGVVIA	C58H104N14O15S[M+H]	GAIIGLMVGGVVIA(+H1)	1269.76	138.88	13728.9
3_6	3_6_02.raw	peptides1		ABETA42	GAIIGLMVGGVVIA	C58H104N14O15S[M+H]	GAIIGLMVGGVVIA(+H1)	1269.76	138.88	13529.2
4_4	4_4_02.raw	peptides1		ABETA42	GAIIGLMVGGVVIA	C58H104N14O15S[M+H]	GAIIGLMVGGVVIA(+H1)	1269.76	138.88	684872
4_5	4_5_02.raw	peptides1		ABETA42	GAIIGLMVGGVVIA	C58H104N14O15S[M+H]	GAIIGLMVGGVVIA(+H1)	1269.76	138.88	4413.9
4_6	4_6_02.raw	peptides1		ABETA42	GAIIGLMVGGVVIA	C58H104N14O15S[M+H]	GAIIGLMVGGVVIA(+H1)	1269.76	138.88	148584
1_7	1_7_02.raw	peptides1		ABETA42	GAIIGLMVGGVVIA	C58H104N14O15S[M+H]	GAIIGLMVGGVVIA(+H1)	1269.76	138.88	115430
1_8	1_8_02.raw	peptides1		ABETA42	GAIIGLMVGGVVIA	C58H104N14O15S[M+H]	GAIIGLMVGGVVIA(+H1)	1269.76	138.88	21717.1
1_9	1_9_02.raw	peptides1		ABETA42	GAIIGLMVGGVVIA	C58H104N14O15S[M+H]	GAIIGLMVGGVVIA(+H1)	1269.76	138.88	129917
2_7	2_7_02.raw	peptides1		ABETA42	GAIIGLMVGGVVIA	C58H104N14O15S[M+H]	GAIIGLMVGGVVIA(+H1)	1269.76	138.88	103460
2_8	2_8_02.raw	peptides1		ABETA42	GAIIGLMVGGVVIA	C58H104N14O15S[M+H]	GAIIGLMVGGVVIA(+H1)	1269.76	138.88	142264
2_9	2_9_02_171217160937.raw	peptides1		ABETA42	GAIIGLMVGGVVIA	C58H104N14O15S[M+H]	GAIIGLMVGGVVIA(+H1)	1269.76	138.88	311920
3_7	3_7_02.raw	peptides1		ABETA42	GAIIGLMVGGVVIA	C58H104N14O15S[M+H]	GAIIGLMVGGVVIA(+H1)	1269.76	138.88	28794.6
3_8	3_8_02.raw	peptides1		ABETA42	GAIIGLMVGGVVIA	C58H104N14O15S[M+H]	GAIIGLMVGGVVIA(+H1)	1269.76	138.88	8756.92
3_9	3_9_02.raw	peptides1		ABETA42	GAIIGLMVGGVVIA	C58H104N14O15S[M+H]	GAIIGLMVGGVVIA(+H1)	1269.76	138.88	115473
4_7	4_7_02.raw	peptides1		ABETA42	GAIIGLMVGGVVIA	C58H104N14O15S[M+H]	GAIIGLMVGGVVIA(+H1)	1269.76	138.88	82891.2
4_8	4_8_02.raw	peptides1		ABETA42	GAIIGLMVGGVVIA	C58H104N14O15S[M+H]	GAIIGLMVGGVVIA(+H1)	1269.76	138.88	90611
4_9	4_9_02.raw	peptides1		ABETA42	GAIIGLMVGGVVIA	C58H104N14O15S[M+H]	GAIIGLMVGGVVIA(+H1)	1269.76	138.88	299814
1_10	1_10_02.raw	peptides1		ABETA42	GAIIGLMVGGVVIA	C58H104N14O15S[M+H]	GAIIGLMVGGVVIA(+H1)	1269.76	138.88	742064
1_11	1_11_02.raw	peptides1		ABETA42	GAIIGLMVGGVVIA	C58H104N14O15S[M+H]	GAIIGLMVGGVVIA(+H1)	1269.76	138.88	5.24568e+06
1_12	1_12_02.raw	peptides1		ABETA42	GAIIGLMVGGVVIA	C58H104N14O15S[M+H]	GAIIGLMVGGVVIA(+H1)	1269.76	138.88	2.57427e+06
2_10	2_10_02.raw	peptides1		ABETA42	GAIIGLMVGGVVIA	C58H104N14O15S[M+H]	GAIIGLMVGGVVIA(+H1)	1269.76	138.88	1.50396e+07
2_11	2_11_02.raw	peptides1		ABETA42	GAIIGLMVGGVVIA	C58H104N14O15S[M+H]	GAIIGLMVGGVVIA(+H1)	1269.76	138.88	699057
2_12	2_12_02.raw	peptides1		ABETA42	GAIIGLMVGGVVIA	C58H104N14O15S[M+H]	GAIIGLMVGGVVIA(+H1)	1269.76	138.88	345103
3_10	3_10_02.raw	peptides1		ABETA42	GAIIGLMVGGVVIA	C58H104N14O15S[M+H]	GAIIGLMVGGVVIA(+H1)	1269.76	138.88	3.81845e+06
3_11	3_11_02.raw	peptides1		ABETA42	GAIIGLMVGGVVIA	C58H104N14O15S[M+H]	GAIIGLMVGGVVIA(+H1)	1269.76	138.88	518446
Chromatograms	FinalList2_2.raw	peptides1		ABETA42	GAIIGLMVGGVVIA	C58H104N14O15S[M+2H]	GAIIGLMVGGVVIA(+H2)	635.384	138.88
GPS01	GPS01_1.raw	peptides1		ABETA42	GAIIGLMVGGVVIA	C58H104N14O15S[M+2H]	GAIIGLMVGGVVIA(+H2)	635.384	138.88	5.17645e+07
GPS02	GPS02_1.raw	peptides1		ABETA42	GAIIGLMVGGVVIA	C58H104N14O15S[M+2H]	GAIIGLMVGGVVIA(+H2)	635.384	138.88	3.17605e+07
GPS03	GPS03_1.raw	peptides1		ABETA42	GAIIGLMVGGVVIA	C58H104N14O15S[M+2H]	GAIIGLMVGGVVIA(+H2)	635.384	138.88	3.5321e+07
GPS04	GPS04_1.raw	peptides1		ABETA42	GAIIGLMVGGVVIA	C58H104N14O15S[M+2H]	GAIIGLMVGGVVIA(+H2)	635.384	138.88	3.13918e+07
GPS05	GPS_05_01.raw	peptides1		ABETA42	GAIIGLMVGGVVIA	C58H104N14O15S[M+2H]	GAIIGLMVGGVVIA(+H2)	635.384	138.88	1.06285e+08
GPS06	GPS_06_01.raw	peptides1		ABETA42	GAIIGLMVGGVVIA	C58H104N14O15S[M+2H]	GAIIGLMVGGVVIA(+H2)	635.384	138.88	4.50952e+07
1_1	1_1_01.raw	peptides1		ABETA42	GAIIGLMVGGVVIA	C58H104N14O15S[M+2H]	GAIIGLMVGGVVIA(+H2)	635.384	138.88	7.22217e+07
1_2	1_2_01.raw	peptides1		ABETA42	GAIIGLMVGGVVIA	C58H104N14O15S[M+2H]	GAIIGLMVGGVVIA(+H2)	635.384	138.88	1.18868e+08
1_3	1_3_01.raw	peptides1		ABETA42	GAIIGLMVGGVVIA	C58H104N14O15S[M+2H]	GAIIGLMVGGVVIA(+H2)	635.384	138.88	6.46081e+07
2_1	2_1_01.raw	peptides1		ABETA42	GAIIGLMVGGVVIA	C58H104N14O15S[M+2H]	GAIIGLMVGGVVIA(+H2)	635.384	138.88	6.9389e+07
2_2	2_2_01.raw	peptides1		ABETA42	GAIIGLMVGGVVIA	C58H104N14O15S[M+2H]	GAIIGLMVGGVVIA(+H2)	635.384	138.88	6.30835e+07
2_3	2_3_01.raw	peptides1		ABETA42	GAIIGLMVGGVVIA	C58H104N14O15S[M+2H]	GAIIGLMVGGVVIA(+H2)	635.384	138.88	9.84515e+07
3_1	3_1_01.raw	peptides1		ABETA42	GAIIGLMVGGVVIA	C58H104N14O15S[M+2H]	GAIIGLMVGGVVIA(+H2)	635.384	138.88	3.60522e+07
3_2	3_2_01_171223210221.raw	peptides1		ABETA42	GAIIGLMVGGVVIA	C58H104N14O15S[M+2H]	GAIIGLMVGGVVIA(+H2)	635.384	138.88	2.1048e+07
3_3	3_3_01.raw	peptides1		ABETA42	GAIIGLMVGGVVIA	C58H104N14O15S[M+2H]	GAIIGLMVGGVVIA(+H2)	635.384	138.88	9.34089e+06
4_1	4_1_01.raw	peptides1		ABETA42	GAIIGLMVGGVVIA	C58H104N14O15S[M+2H]	GAIIGLMVGGVVIA(+H2)	635.384	138.88	7.31368e+06
4_2	4_2_01.raw	peptides1		ABETA42	GAIIGLMVGGVVIA	C58H104N14O15S[M+2H]	GAIIGLMVGGVVIA(+H2)	635.384	138.88	1.83681e+08
4_3	4_3_01.raw	peptides1		ABETA42	GAIIGLMVGGVVIA	C58H104N14O15S[M+2H]	GAIIGLMVGGVVIA(+H2)	635.384	138.88	1.9383e+08
1_4	1_4_01.raw	peptides1		ABETA42	GAIIGLMVGGVVIA	C58H104N14O15S[M+2H]	GAIIGLMVGGVVIA(+H2)	635.384	138.88	2.29014e+06
1_5	1_5_01.raw	peptides1		ABETA42	GAIIGLMVGGVVIA	C58H104N14O15S[M+2H]	GAIIGLMVGGVVIA(+H2)	635.384	138.88	695371
1_6	1_6_01.raw	peptides1		ABETA42	GAIIGLMVGGVVIA	C58H104N14O15S[M+2H]	GAIIGLMVGGVVIA(+H2)	635.384	138.88	5.06018e+06
2_4	2_4_01.raw	peptides1		ABETA42	GAIIGLMVGGVVIA	C58H104N14O15S[M+2H]	GAIIGLMVGGVVIA(+H2)	635.384	138.88	2.26465e+06
2_5	2_5_01.raw	peptides1		ABETA42	GAIIGLMVGGVVIA	C58H104N14O15S[M+2H]	GAIIGLMVGGVVIA(+H2)	635.384	138.88	8.09631e+06
2_6	2_6_01.raw	peptides1		ABETA42	GAIIGLMVGGVVIA	C58H104N14O15S[M+2H]	GAIIGLMVGGVVIA(+H2)	635.384	138.88	1.811e+06
3_4	3_4_01.raw	peptides1		ABETA42	GAIIGLMVGGVVIA	C58H104N14O15S[M+2H]	GAIIGLMVGGVVIA(+H2)	635.384	138.88	475779
3_5	3_5_01.raw	peptides1		ABETA42	GAIIGLMVGGVVIA	C58H104N14O15S[M+2H]	GAIIGLMVGGVVIA(+H2)	635.384	138.88	160616
3_6	3_6_01.raw	peptides1		ABETA42	GAIIGLMVGGVVIA	C58H104N14O15S[M+2H]	GAIIGLMVGGVVIA(+H2)	635.384	138.88	1.09974e+06
4_4	4_4_01.raw	peptides1		ABETA42	GAIIGLMVGGVVIA	C58H104N14O15S[M+2H]	GAIIGLMVGGVVIA(+H2)	635.384	138.88	5.95449e+06
4_5	4_5_01.raw	peptides1		ABETA42	GAIIGLMVGGVVIA	C58H104N14O15S[M+2H]	GAIIGLMVGGVVIA(+H2)	635.384	138.88	2.70182e+06
4_6	4_6_01.raw	peptides1		ABETA42	GAIIGLMVGGVVIA	C58H104N14O15S[M+2H]	GAIIGLMVGGVVIA(+H2)	635.384	138.88	2.74469e+07
1_7	1_7_01.raw	peptides1		ABETA42	GAIIGLMVGGVVIA	C58H104N14O15S[M+2H]	GAIIGLMVGGVVIA(+H2)	635.384	138.88	1.23913e+06
1_8	1_8_01_171211223541.raw	peptides1		ABETA42	GAIIGLMVGGVVIA	C58H104N14O15S[M+2H]	GAIIGLMVGGVVIA(+H2)	635.384	138.88	249382
1_9	1_9_01.raw	peptides1		ABETA42	GAIIGLMVGGVVIA	C58H104N14O15S[M+2H]	GAIIGLMVGGVVIA(+H2)	635.384	138.88	731026
2_7	2_7_01.raw	peptides1		ABETA42	GAIIGLMVGGVVIA	C58H104N14O15S[M+2H]	GAIIGLMVGGVVIA(+H2)	635.384	138.88	1.50856e+06
2_8	2_8_01.raw	peptides1		ABETA42	GAIIGLMVGGVVIA	C58H104N14O15S[M+2H]	GAIIGLMVGGVVIA(+H2)	635.384	138.88	1.50798e+06
2_9	2_9_01_171217123101.raw	peptides1		ABETA42	GAIIGLMVGGVVIA	C58H104N14O15S[M+2H]	GAIIGLMVGGVVIA(+H2)	635.384	138.88	2.33237e+06
3_7	3_7_01.raw	peptides1		ABETA42	GAIIGLMVGGVVIA	C58H104N14O15S[M+2H]	GAIIGLMVGGVVIA(+H2)	635.384	138.88	659333
3_8	3_8_01.raw	peptides1		ABETA42	GAIIGLMVGGVVIA	C58H104N14O15S[M+2H]	GAIIGLMVGGVVIA(+H2)	635.384	138.88	765409
3_9	3_9_01.raw	peptides1		ABETA42	GAIIGLMVGGVVIA	C58H104N14O15S[M+2H]	GAIIGLMVGGVVIA(+H2)	635.384	138.88	1.59516e+06
4_7	4_7_01.raw	peptides1		ABETA42	GAIIGLMVGGVVIA	C58H104N14O15S[M+2H]	GAIIGLMVGGVVIA(+H2)	635.384	138.88	6.19931e+06
4_8	4_8_01.raw	peptides1		ABETA42	GAIIGLMVGGVVIA	C58H104N14O15S[M+2H]	GAIIGLMVGGVVIA(+H2)	635.384	138.88	1.82334e+06
4_9	4_9_01.raw	peptides1		ABETA42	GAIIGLMVGGVVIA	C58H104N14O15S[M+2H]	GAIIGLMVGGVVIA(+H2)	635.384	138.88	2.31664e+06
1_10	1_10_01.raw	peptides1		ABETA42	GAIIGLMVGGVVIA	C58H104N14O15S[M+2H]	GAIIGLMVGGVVIA(+H2)	635.384	138.88	1.37823e+07
1_11	1_11_01.raw	peptides1		ABETA42	GAIIGLMVGGVVIA	C58H104N14O15S[M+2H]	GAIIGLMVGGVVIA(+H2)	635.384	138.88	4.11926e+07
1_12	1_12_01.raw	peptides1		ABETA42	GAIIGLMVGGVVIA	C58H104N14O15S[M+2H]	GAIIGLMVGGVVIA(+H2)	635.384	138.88	3.75376e+07
2_10	2_10_01.raw	peptides1		ABETA42	GAIIGLMVGGVVIA	C58H104N14O15S[M+2H]	GAIIGLMVGGVVIA(+H2)	635.384	138.88	7.94809e+07
2_11	2_11_01_171223040132.raw	peptides1		ABETA42	GAIIGLMVGGVVIA	C58H104N14O15S[M+2H]	GAIIGLMVGGVVIA(+H2)	635.384	138.88	1.66485e+07
2_12	2_12_01.raw	peptides1		ABETA42	GAIIGLMVGGVVIA	C58H104N14O15S[M+2H]	GAIIGLMVGGVVIA(+H2)	635.384	138.88	3.17687e+06
3_10	3_10_01.raw	peptides1		ABETA42	GAIIGLMVGGVVIA	C58H104N14O15S[M+2H]	GAIIGLMVGGVVIA(+H2)	635.384	138.88	3.18629e+07
3_11	3_11_01.raw	peptides1		ABETA42	GAIIGLMVGGVVIA	C58H104N14O15S[M+2H]	GAIIGLMVGGVVIA(+H2)	635.384	138.88	2.09532e+07
Chromatograms	FinalList2_2.raw	sp|Q9UKV3|ACINU_HUMAN	Q9UKV3	ACIN1	TGTLVEEAFWIDK	C70H105N15O22[M+2H]	TGTLVEEAFWIDK(+H2)	754.885	104.6
GPS01	GPS01_2.raw	sp|Q9UKV3|ACINU_HUMAN	Q9UKV3	ACIN1	TGTLVEEAFWIDK	C70H105N15O22[M+2H]	TGTLVEEAFWIDK(+H2)	754.885	104.6	1.59046e+06
GPS02	GPS02_2.raw	sp|Q9UKV3|ACINU_HUMAN	Q9UKV3	ACIN1	TGTLVEEAFWIDK	C70H105N15O22[M+2H]	TGTLVEEAFWIDK(+H2)	754.885	104.6	1.22122e+06
GPS03	GPS03_2.raw	sp|Q9UKV3|ACINU_HUMAN	Q9UKV3	ACIN1	TGTLVEEAFWIDK	C70H105N15O22[M+2H]	TGTLVEEAFWIDK(+H2)	754.885	104.6	1.95708e+06
GPS04	GPS04_2.raw	sp|Q9UKV3|ACINU_HUMAN	Q9UKV3	ACIN1	TGTLVEEAFWIDK	C70H105N15O22[M+2H]	TGTLVEEAFWIDK(+H2)	754.885	104.6	1.71884e+06
GPS05	GPS_05_02.raw	sp|Q9UKV3|ACINU_HUMAN	Q9UKV3	ACIN1	TGTLVEEAFWIDK	C70H105N15O22[M+2H]	TGTLVEEAFWIDK(+H2)	754.885	104.6	3.0149e+06
GPS06	GPS_06_02.raw	sp|Q9UKV3|ACINU_HUMAN	Q9UKV3	ACIN1	TGTLVEEAFWIDK	C70H105N15O22[M+2H]	TGTLVEEAFWIDK(+H2)	754.885	104.6	2.66411e+06
1_1	1_1_02.raw	sp|Q9UKV3|ACINU_HUMAN	Q9UKV3	ACIN1	TGTLVEEAFWIDK	C70H105N15O22[M+2H]	TGTLVEEAFWIDK(+H2)	754.885	104.6	1.40136e+06
1_2	1_2_02.raw	sp|Q9UKV3|ACINU_HUMAN	Q9UKV3	ACIN1	TGTLVEEAFWIDK	C70H105N15O22[M+2H]	TGTLVEEAFWIDK(+H2)	754.885	104.6	1.83847e+06
1_3	1_3_02.raw	sp|Q9UKV3|ACINU_HUMAN	Q9UKV3	ACIN1	TGTLVEEAFWIDK	C70H105N15O22[M+2H]	TGTLVEEAFWIDK(+H2)	754.885	104.6	852672
2_1	2_1_02.raw	sp|Q9UKV3|ACINU_HUMAN	Q9UKV3	ACIN1	TGTLVEEAFWIDK	C70H105N15O22[M+2H]	TGTLVEEAFWIDK(+H2)	754.885	104.6	2.56928e+06
2_2	2_2_02.raw	sp|Q9UKV3|ACINU_HUMAN	Q9UKV3	ACIN1	TGTLVEEAFWIDK	C70H105N15O22[M+2H]	TGTLVEEAFWIDK(+H2)	754.885	104.6	4.09384e+06
2_3	2_3_02.raw	sp|Q9UKV3|ACINU_HUMAN	Q9UKV3	ACIN1	TGTLVEEAFWIDK	C70H105N15O22[M+2H]	TGTLVEEAFWIDK(+H2)	754.885	104.6	3.32277e+06
3_1	3_1_02.raw	sp|Q9UKV3|ACINU_HUMAN	Q9UKV3	ACIN1	TGTLVEEAFWIDK	C70H105N15O22[M+2H]	TGTLVEEAFWIDK(+H2)	754.885	104.6	2.04479e+06
3_2	3_2_02.raw	sp|Q9UKV3|ACINU_HUMAN	Q9UKV3	ACIN1	TGTLVEEAFWIDK	C70H105N15O22[M+2H]	TGTLVEEAFWIDK(+H2)	754.885	104.6	1.13176e+06
3_3	3_3_02.raw	sp|Q9UKV3|ACINU_HUMAN	Q9UKV3	ACIN1	TGTLVEEAFWIDK	C70H105N15O22[M+2H]	TGTLVEEAFWIDK(+H2)	754.885	104.6	423714
4_1	4_1_02.raw	sp|Q9UKV3|ACINU_HUMAN	Q9UKV3	ACIN1	TGTLVEEAFWIDK	C70H105N15O22[M+2H]	TGTLVEEAFWIDK(+H2)	754.885	104.6	2.49968e+06
4_2	4_2_02.raw	sp|Q9UKV3|ACINU_HUMAN	Q9UKV3	ACIN1	TGTLVEEAFWIDK	C70H105N15O22[M+2H]	TGTLVEEAFWIDK(+H2)	754.885	104.6	2.41323e+06
4_3	4_3_02.raw	sp|Q9UKV3|ACINU_HUMAN	Q9UKV3	ACIN1	TGTLVEEAFWIDK	C70H105N15O22[M+2H]	TGTLVEEAFWIDK(+H2)	754.885	104.6	3.50652e+06
1_4	1_4_02.raw	sp|Q9UKV3|ACINU_HUMAN	Q9UKV3	ACIN1	TGTLVEEAFWIDK	C70H105N15O22[M+2H]	TGTLVEEAFWIDK(+H2)	754.885	104.6	482313
1_5	1_5_02.raw	sp|Q9UKV3|ACINU_HUMAN	Q9UKV3	ACIN1	TGTLVEEAFWIDK	C70H105N15O22[M+2H]	TGTLVEEAFWIDK(+H2)	754.885	104.6	836184
1_6	1_6_02.raw	sp|Q9UKV3|ACINU_HUMAN	Q9UKV3	ACIN1	TGTLVEEAFWIDK	C70H105N15O22[M+2H]	TGTLVEEAFWIDK(+H2)	754.885	104.6	1.41841e+06
2_4	2_4_02.raw	sp|Q9UKV3|ACINU_HUMAN	Q9UKV3	ACIN1	TGTLVEEAFWIDK	C70H105N15O22[M+2H]	TGTLVEEAFWIDK(+H2)	754.885	104.6	1.54725e+06
2_5	2_5_02.raw	sp|Q9UKV3|ACINU_HUMAN	Q9UKV3	ACIN1	TGTLVEEAFWIDK	C70H105N15O22[M+2H]	TGTLVEEAFWIDK(+H2)	754.885	104.6	1.81307e+06
2_6	2_6_02.raw	sp|Q9UKV3|ACINU_HUMAN	Q9UKV3	ACIN1	TGTLVEEAFWIDK	C70H105N15O22[M+2H]	TGTLVEEAFWIDK(+H2)	754.885	104.6	2.22834e+06
3_4	3_4_02.raw	sp|Q9UKV3|ACINU_HUMAN	Q9UKV3	ACIN1	TGTLVEEAFWIDK	C70H105N15O22[M+2H]	TGTLVEEAFWIDK(+H2)	754.885	104.6	704812
3_5	3_5_02.raw	sp|Q9UKV3|ACINU_HUMAN	Q9UKV3	ACIN1	TGTLVEEAFWIDK	C70H105N15O22[M+2H]	TGTLVEEAFWIDK(+H2)	754.885	104.6	943315
3_6	3_6_02.raw	sp|Q9UKV3|ACINU_HUMAN	Q9UKV3	ACIN1	TGTLVEEAFWIDK	C70H105N15O22[M+2H]	TGTLVEEAFWIDK(+H2)	754.885	104.6	1.56078e+06
4_4	4_4_02.raw	sp|Q9UKV3|ACINU_HUMAN	Q9UKV3	ACIN1	TGTLVEEAFWIDK	C70H105N15O22[M+2H]	TGTLVEEAFWIDK(+H2)	754.885	104.6	1.18157e+06
4_5	4_5_02.raw	sp|Q9UKV3|ACINU_HUMAN	Q9UKV3	ACIN1	TGTLVEEAFWIDK	C70H105N15O22[M+2H]	TGTLVEEAFWIDK(+H2)	754.885	104.6	2.38066e+06
4_6	4_6_02.raw	sp|Q9UKV3|ACINU_HUMAN	Q9UKV3	ACIN1	TGTLVEEAFWIDK	C70H105N15O22[M+2H]	TGTLVEEAFWIDK(+H2)	754.885	104.6	2.53331e+06
1_7	1_7_02.raw	sp|Q9UKV3|ACINU_HUMAN	Q9UKV3	ACIN1	TGTLVEEAFWIDK	C70H105N15O22[M+2H]	TGTLVEEAFWIDK(+H2)	754.885	104.6	292169
1_8	1_8_02.raw	sp|Q9UKV3|ACINU_HUMAN	Q9UKV3	ACIN1	TGTLVEEAFWIDK	C70H105N15O22[M+2H]	TGTLVEEAFWIDK(+H2)	754.885	104.6	1.25615e+06
1_9	1_9_02.raw	sp|Q9UKV3|ACINU_HUMAN	Q9UKV3	ACIN1	TGTLVEEAFWIDK	C70H105N15O22[M+2H]	TGTLVEEAFWIDK(+H2)	754.885	104.6	1.94773e+06
2_7	2_7_02.raw	sp|Q9UKV3|ACINU_HUMAN	Q9UKV3	ACIN1	TGTLVEEAFWIDK	C70H105N15O22[M+2H]	TGTLVEEAFWIDK(+H2)	754.885	104.6	3.1076e+06
2_8	2_8_02.raw	sp|Q9UKV3|ACINU_HUMAN	Q9UKV3	ACIN1	TGTLVEEAFWIDK	C70H105N15O22[M+2H]	TGTLVEEAFWIDK(+H2)	754.885	104.6	3.55698e+06
2_9	2_9_02_171217160937.raw	sp|Q9UKV3|ACINU_HUMAN	Q9UKV3	ACIN1	TGTLVEEAFWIDK	C70H105N15O22[M+2H]	TGTLVEEAFWIDK(+H2)	754.885	104.6	1.40317e+06
3_7	3_7_02.raw	sp|Q9UKV3|ACINU_HUMAN	Q9UKV3	ACIN1	TGTLVEEAFWIDK	C70H105N15O22[M+2H]	TGTLVEEAFWIDK(+H2)	754.885	104.6	616668
3_8	3_8_02.raw	sp|Q9UKV3|ACINU_HUMAN	Q9UKV3	ACIN1	TGTLVEEAFWIDK	C70H105N15O22[M+2H]	TGTLVEEAFWIDK(+H2)	754.885	104.6	566857
3_9	3_9_02.raw	sp|Q9UKV3|ACINU_HUMAN	Q9UKV3	ACIN1	TGTLVEEAFWIDK	C70H105N15O22[M+2H]	TGTLVEEAFWIDK(+H2)	754.885	104.6	3.01542e+06
4_7	4_7_02.raw	sp|Q9UKV3|ACINU_HUMAN	Q9UKV3	ACIN1	TGTLVEEAFWIDK	C70H105N15O22[M+2H]	TGTLVEEAFWIDK(+H2)	754.885	104.6	1.48802e+06
4_8	4_8_02.raw	sp|Q9UKV3|ACINU_HUMAN	Q9UKV3	ACIN1	TGTLVEEAFWIDK	C70H105N15O22[M+2H]	TGTLVEEAFWIDK(+H2)	754.885	104.6	41122.8
4_9	4_9_02.raw	sp|Q9UKV3|ACINU_HUMAN	Q9UKV3	ACIN1	TGTLVEEAFWIDK	C70H105N15O22[M+2H]	TGTLVEEAFWIDK(+H2)	754.885	104.6	2.68944e+06
1_10	1_10_02.raw	sp|Q9UKV3|ACINU_HUMAN	Q9UKV3	ACIN1	TGTLVEEAFWIDK	C70H105N15O22[M+2H]	TGTLVEEAFWIDK(+H2)	754.885	104.6	2.65006e+06
1_11	1_11_02.raw	sp|Q9UKV3|ACINU_HUMAN	Q9UKV3	ACIN1	TGTLVEEAFWIDK	C70H105N15O22[M+2H]	TGTLVEEAFWIDK(+H2)	754.885	104.6	378671
1_12	1_12_02.raw	sp|Q9UKV3|ACINU_HUMAN	Q9UKV3	ACIN1	TGTLVEEAFWIDK	C70H105N15O22[M+2H]	TGTLVEEAFWIDK(+H2)	754.885	104.6	5.28488e+06
2_10	2_10_02.raw	sp|Q9UKV3|ACINU_HUMAN	Q9UKV3	ACIN1	TGTLVEEAFWIDK	C70H105N15O22[M+2H]	TGTLVEEAFWIDK(+H2)	754.885	104.6	4.864e+06
2_11	2_11_02.raw	sp|Q9UKV3|ACINU_HUMAN	Q9UKV3	ACIN1	TGTLVEEAFWIDK	C70H105N15O22[M+2H]	TGTLVEEAFWIDK(+H2)	754.885	104.6	3.61719e+06
2_12	2_12_02.raw	sp|Q9UKV3|ACINU_HUMAN	Q9UKV3	ACIN1	TGTLVEEAFWIDK	C70H105N15O22[M+2H]	TGTLVEEAFWIDK(+H2)	754.885	104.6	4.17739e+06
3_10	3_10_02.raw	sp|Q9UKV3|ACINU_HUMAN	Q9UKV3	ACIN1	TGTLVEEAFWIDK	C70H105N15O22[M+2H]	TGTLVEEAFWIDK(+H2)	754.885	104.6	1.22225e+06
3_11	3_11_02.raw	sp|Q9UKV3|ACINU_HUMAN	Q9UKV3	ACIN1	TGTLVEEAFWIDK	C70H105N15O22[M+2H]	TGTLVEEAFWIDK(+H2)	754.885	104.6	1.44858e+06
Chromatograms	FinalList2_2.raw	sp|Q9UKV3|ACINU_HUMAN	Q9UKV3	ACIN1	SHC[+57]FVTYSTVEEAVATR	C84H129N23O29S[M+2H]	SHCFVTYSTVEEAVATR(+H2)	978.96	78.99
GPS01	GPS01_1.raw	sp|Q9UKV3|ACINU_HUMAN	Q9UKV3	ACIN1	SHC[+57]FVTYSTVEEAVATR	C84H129N23O29S[M+2H]	SHCFVTYSTVEEAVATR(+H2)	978.96	78.99	803976
GPS02	GPS02_1.raw	sp|Q9UKV3|ACINU_HUMAN	Q9UKV3	ACIN1	SHC[+57]FVTYSTVEEAVATR	C84H129N23O29S[M+2H]	SHCFVTYSTVEEAVATR(+H2)	978.96	78.99	595083
GPS03	GPS03_1.raw	sp|Q9UKV3|ACINU_HUMAN	Q9UKV3	ACIN1	SHC[+57]FVTYSTVEEAVATR	C84H129N23O29S[M+2H]	SHCFVTYSTVEEAVATR(+H2)	978.96	78.99	528815
GPS04	GPS04_1.raw	sp|Q9UKV3|ACINU_HUMAN	Q9UKV3	ACIN1	SHC[+57]FVTYSTVEEAVATR	C84H129N23O29S[M+2H]	SHCFVTYSTVEEAVATR(+H2)	978.96	78.99	472677
GPS05	GPS_05_01.raw	sp|Q9UKV3|ACINU_HUMAN	Q9UKV3	ACIN1	SHC[+57]FVTYSTVEEAVATR	C84H129N23O29S[M+2H]	SHCFVTYSTVEEAVATR(+H2)	978.96	78.99	969462
GPS06	GPS_06_01.raw	sp|Q9UKV3|ACINU_HUMAN	Q9UKV3	ACIN1	SHC[+57]FVTYSTVEEAVATR	C84H129N23O29S[M+2H]	SHCFVTYSTVEEAVATR(+H2)	978.96	78.99	718988
1_1	1_1_01.raw	sp|Q9UKV3|ACINU_HUMAN	Q9UKV3	ACIN1	SHC[+57]FVTYSTVEEAVATR	C84H129N23O29S[M+2H]	SHCFVTYSTVEEAVATR(+H2)	978.96	78.99	467508
1_2	1_2_01.raw	sp|Q9UKV3|ACINU_HUMAN	Q9UKV3	ACIN1	SHC[+57]FVTYSTVEEAVATR	C84H129N23O29S[M+2H]	SHCFVTYSTVEEAVATR(+H2)	978.96	78.99	907952
1_3	1_3_01.raw	sp|Q9UKV3|ACINU_HUMAN	Q9UKV3	ACIN1	SHC[+57]FVTYSTVEEAVATR	C84H129N23O29S[M+2H]	SHCFVTYSTVEEAVATR(+H2)	978.96	78.99	823915
2_1	2_1_01.raw	sp|Q9UKV3|ACINU_HUMAN	Q9UKV3	ACIN1	SHC[+57]FVTYSTVEEAVATR	C84H129N23O29S[M+2H]	SHCFVTYSTVEEAVATR(+H2)	978.96	78.99	1.39517e+06
2_2	2_2_01.raw	sp|Q9UKV3|ACINU_HUMAN	Q9UKV3	ACIN1	SHC[+57]FVTYSTVEEAVATR	C84H129N23O29S[M+2H]	SHCFVTYSTVEEAVATR(+H2)	978.96	78.99	1.73701e+06
2_3	2_3_01.raw	sp|Q9UKV3|ACINU_HUMAN	Q9UKV3	ACIN1	SHC[+57]FVTYSTVEEAVATR	C84H129N23O29S[M+2H]	SHCFVTYSTVEEAVATR(+H2)	978.96	78.99	1.26307e+06
3_1	3_1_01.raw	sp|Q9UKV3|ACINU_HUMAN	Q9UKV3	ACIN1	SHC[+57]FVTYSTVEEAVATR	C84H129N23O29S[M+2H]	SHCFVTYSTVEEAVATR(+H2)	978.96	78.99	158698
3_2	3_2_01_171223210221.raw	sp|Q9UKV3|ACINU_HUMAN	Q9UKV3	ACIN1	SHC[+57]FVTYSTVEEAVATR	C84H129N23O29S[M+2H]	SHCFVTYSTVEEAVATR(+H2)	978.96	78.99	0
3_3	3_3_01.raw	sp|Q9UKV3|ACINU_HUMAN	Q9UKV3	ACIN1	SHC[+57]FVTYSTVEEAVATR	C84H129N23O29S[M+2H]	SHCFVTYSTVEEAVATR(+H2)	978.96	78.99	64846.5
4_1	4_1_01.raw	sp|Q9UKV3|ACINU_HUMAN	Q9UKV3	ACIN1	SHC[+57]FVTYSTVEEAVATR	C84H129N23O29S[M+2H]	SHCFVTYSTVEEAVATR(+H2)	978.96	78.99	9265.67
4_2	4_2_01.raw	sp|Q9UKV3|ACINU_HUMAN	Q9UKV3	ACIN1	SHC[+57]FVTYSTVEEAVATR	C84H129N23O29S[M+2H]	SHCFVTYSTVEEAVATR(+H2)	978.96	78.99	285088
4_3	4_3_01.raw	sp|Q9UKV3|ACINU_HUMAN	Q9UKV3	ACIN1	SHC[+57]FVTYSTVEEAVATR	C84H129N23O29S[M+2H]	SHCFVTYSTVEEAVATR(+H2)	978.96	78.99	556627
1_4	1_4_01.raw	sp|Q9UKV3|ACINU_HUMAN	Q9UKV3	ACIN1	SHC[+57]FVTYSTVEEAVATR	C84H129N23O29S[M+2H]	SHCFVTYSTVEEAVATR(+H2)	978.96	78.99	262025
1_5	1_5_01.raw	sp|Q9UKV3|ACINU_HUMAN	Q9UKV3	ACIN1	SHC[+57]FVTYSTVEEAVATR	C84H129N23O29S[M+2H]	SHCFVTYSTVEEAVATR(+H2)	978.96	78.99	714821
1_6	1_6_01.raw	sp|Q9UKV3|ACINU_HUMAN	Q9UKV3	ACIN1	SHC[+57]FVTYSTVEEAVATR	C84H129N23O29S[M+2H]	SHCFVTYSTVEEAVATR(+H2)	978.96	78.99	1.45877e+06
2_4	2_4_01.raw	sp|Q9UKV3|ACINU_HUMAN	Q9UKV3	ACIN1	SHC[+57]FVTYSTVEEAVATR	C84H129N23O29S[M+2H]	SHCFVTYSTVEEAVATR(+H2)	978.96	78.99	639727
2_5	2_5_01.raw	sp|Q9UKV3|ACINU_HUMAN	Q9UKV3	ACIN1	SHC[+57]FVTYSTVEEAVATR	C84H129N23O29S[M+2H]	SHCFVTYSTVEEAVATR(+H2)	978.96	78.99	827174
2_6	2_6_01.raw	sp|Q9UKV3|ACINU_HUMAN	Q9UKV3	ACIN1	SHC[+57]FVTYSTVEEAVATR	C84H129N23O29S[M+2H]	SHCFVTYSTVEEAVATR(+H2)	978.96	78.99	843112
3_4	3_4_01.raw	sp|Q9UKV3|ACINU_HUMAN	Q9UKV3	ACIN1	SHC[+57]FVTYSTVEEAVATR	C84H129N23O29S[M+2H]	SHCFVTYSTVEEAVATR(+H2)	978.96	78.99	249905
3_5	3_5_01.raw	sp|Q9UKV3|ACINU_HUMAN	Q9UKV3	ACIN1	SHC[+57]FVTYSTVEEAVATR	C84H129N23O29S[M+2H]	SHCFVTYSTVEEAVATR(+H2)	978.96	78.99	204621
3_6	3_6_01.raw	sp|Q9UKV3|ACINU_HUMAN	Q9UKV3	ACIN1	SHC[+57]FVTYSTVEEAVATR	C84H129N23O29S[M+2H]	SHCFVTYSTVEEAVATR(+H2)	978.96	78.99	49046.6
4_4	4_4_01.raw	sp|Q9UKV3|ACINU_HUMAN	Q9UKV3	ACIN1	SHC[+57]FVTYSTVEEAVATR	C84H129N23O29S[M+2H]	SHCFVTYSTVEEAVATR(+H2)	978.96	78.99	5366.21
4_5	4_5_01.raw	sp|Q9UKV3|ACINU_HUMAN	Q9UKV3	ACIN1	SHC[+57]FVTYSTVEEAVATR	C84H129N23O29S[M+2H]	SHCFVTYSTVEEAVATR(+H2)	978.96	78.99	558633
4_6	4_6_01.raw	sp|Q9UKV3|ACINU_HUMAN	Q9UKV3	ACIN1	SHC[+57]FVTYSTVEEAVATR	C84H129N23O29S[M+2H]	SHCFVTYSTVEEAVATR(+H2)	978.96	78.99	436776
1_7	1_7_01.raw	sp|Q9UKV3|ACINU_HUMAN	Q9UKV3	ACIN1	SHC[+57]FVTYSTVEEAVATR	C84H129N23O29S[M+2H]	SHCFVTYSTVEEAVATR(+H2)	978.96	78.99	124162
1_8	1_8_01_171211223541.raw	sp|Q9UKV3|ACINU_HUMAN	Q9UKV3	ACIN1	SHC[+57]FVTYSTVEEAVATR	C84H129N23O29S[M+2H]	SHCFVTYSTVEEAVATR(+H2)	978.96	78.99	361328
1_9	1_9_01.raw	sp|Q9UKV3|ACINU_HUMAN	Q9UKV3	ACIN1	SHC[+57]FVTYSTVEEAVATR	C84H129N23O29S[M+2H]	SHCFVTYSTVEEAVATR(+H2)	978.96	78.99	710269
2_7	2_7_01.raw	sp|Q9UKV3|ACINU_HUMAN	Q9UKV3	ACIN1	SHC[+57]FVTYSTVEEAVATR	C84H129N23O29S[M+2H]	SHCFVTYSTVEEAVATR(+H2)	978.96	78.99	1.02644e+06
2_8	2_8_01.raw	sp|Q9UKV3|ACINU_HUMAN	Q9UKV3	ACIN1	SHC[+57]FVTYSTVEEAVATR	C84H129N23O29S[M+2H]	SHCFVTYSTVEEAVATR(+H2)	978.96	78.99	1.06831e+06
2_9	2_9_01_171217123101.raw	sp|Q9UKV3|ACINU_HUMAN	Q9UKV3	ACIN1	SHC[+57]FVTYSTVEEAVATR	C84H129N23O29S[M+2H]	SHCFVTYSTVEEAVATR(+H2)	978.96	78.99	420816
3_7	3_7_01.raw	sp|Q9UKV3|ACINU_HUMAN	Q9UKV3	ACIN1	SHC[+57]FVTYSTVEEAVATR	C84H129N23O29S[M+2H]	SHCFVTYSTVEEAVATR(+H2)	978.96	78.99	5080.68
3_8	3_8_01.raw	sp|Q9UKV3|ACINU_HUMAN	Q9UKV3	ACIN1	SHC[+57]FVTYSTVEEAVATR	C84H129N23O29S[M+2H]	SHCFVTYSTVEEAVATR(+H2)	978.96	78.99	149984
3_9	3_9_01.raw	sp|Q9UKV3|ACINU_HUMAN	Q9UKV3	ACIN1	SHC[+57]FVTYSTVEEAVATR	C84H129N23O29S[M+2H]	SHCFVTYSTVEEAVATR(+H2)	978.96	78.99	709445
4_7	4_7_01.raw	sp|Q9UKV3|ACINU_HUMAN	Q9UKV3	ACIN1	SHC[+57]FVTYSTVEEAVATR	C84H129N23O29S[M+2H]	SHCFVTYSTVEEAVATR(+H2)	978.96	78.99	491896
4_8	4_8_01.raw	sp|Q9UKV3|ACINU_HUMAN	Q9UKV3	ACIN1	SHC[+57]FVTYSTVEEAVATR	C84H129N23O29S[M+2H]	SHCFVTYSTVEEAVATR(+H2)	978.96	78.99	276607
4_9	4_9_01.raw	sp|Q9UKV3|ACINU_HUMAN	Q9UKV3	ACIN1	SHC[+57]FVTYSTVEEAVATR	C84H129N23O29S[M+2H]	SHCFVTYSTVEEAVATR(+H2)	978.96	78.99	555098
1_10	1_10_01.raw	sp|Q9UKV3|ACINU_HUMAN	Q9UKV3	ACIN1	SHC[+57]FVTYSTVEEAVATR	C84H129N23O29S[M+2H]	SHCFVTYSTVEEAVATR(+H2)	978.96	78.99	1.17219e+06
1_11	1_11_01.raw	sp|Q9UKV3|ACINU_HUMAN	Q9UKV3	ACIN1	SHC[+57]FVTYSTVEEAVATR	C84H129N23O29S[M+2H]	SHCFVTYSTVEEAVATR(+H2)	978.96	78.99	157421
1_12	1_12_01.raw	sp|Q9UKV3|ACINU_HUMAN	Q9UKV3	ACIN1	SHC[+57]FVTYSTVEEAVATR	C84H129N23O29S[M+2H]	SHCFVTYSTVEEAVATR(+H2)	978.96	78.99	2.00103e+06
2_10	2_10_01.raw	sp|Q9UKV3|ACINU_HUMAN	Q9UKV3	ACIN1	SHC[+57]FVTYSTVEEAVATR	C84H129N23O29S[M+2H]	SHCFVTYSTVEEAVATR(+H2)	978.96	78.99	1.82559e+06
2_11	2_11_01_171223040132.raw	sp|Q9UKV3|ACINU_HUMAN	Q9UKV3	ACIN1	SHC[+57]FVTYSTVEEAVATR	C84H129N23O29S[M+2H]	SHCFVTYSTVEEAVATR(+H2)	978.96	78.99	696529
2_12	2_12_01.raw	sp|Q9UKV3|ACINU_HUMAN	Q9UKV3	ACIN1	SHC[+57]FVTYSTVEEAVATR	C84H129N23O29S[M+2H]	SHCFVTYSTVEEAVATR(+H2)	978.96	78.99	1.2216e+06
3_10	3_10_01.raw	sp|Q9UKV3|ACINU_HUMAN	Q9UKV3	ACIN1	SHC[+57]FVTYSTVEEAVATR	C84H129N23O29S[M+2H]	SHCFVTYSTVEEAVATR(+H2)	978.96	78.99	113011
3_11	3_11_01.raw	sp|Q9UKV3|ACINU_HUMAN	Q9UKV3	ACIN1	SHC[+57]FVTYSTVEEAVATR	C84H129N23O29S[M+2H]	SHCFVTYSTVEEAVATR(+H2)	978.96	78.99	309584
Chromatograms	FinalList2_1.raw	sp|Q9UKV3|ACINU_HUMAN	Q9UKV3	ACIN1	TALHGVK	C32H56N10O9[M+2H]	TALHGVK(+H2)	363.219	36.2
GPS01	GPS01_1.raw	sp|Q9UKV3|ACINU_HUMAN	Q9UKV3	ACIN1	TALHGVK	C32H56N10O9[M+2H]	TALHGVK(+H2)	363.219	36.2	1.74182e+06
GPS02	GPS02_1.raw	sp|Q9UKV3|ACINU_HUMAN	Q9UKV3	ACIN1	TALHGVK	C32H56N10O9[M+2H]	TALHGVK(+H2)	363.219	36.2	1.55116e+06
GPS03	GPS03_1.raw	sp|Q9UKV3|ACINU_HUMAN	Q9UKV3	ACIN1	TALHGVK	C32H56N10O9[M+2H]	TALHGVK(+H2)	363.219	36.2	1.63472e+06
GPS04	GPS04_1.raw	sp|Q9UKV3|ACINU_HUMAN	Q9UKV3	ACIN1	TALHGVK	C32H56N10O9[M+2H]	TALHGVK(+H2)	363.219	36.2	1.57476e+06
GPS05	GPS_05_01.raw	sp|Q9UKV3|ACINU_HUMAN	Q9UKV3	ACIN1	TALHGVK	C32H56N10O9[M+2H]	TALHGVK(+H2)	363.219	36.2	2.38021e+06
GPS06	GPS_06_01.raw	sp|Q9UKV3|ACINU_HUMAN	Q9UKV3	ACIN1	TALHGVK	C32H56N10O9[M+2H]	TALHGVK(+H2)	363.219	36.2	1.55871e+06
1_1	1_1_01.raw	sp|Q9UKV3|ACINU_HUMAN	Q9UKV3	ACIN1	TALHGVK	C32H56N10O9[M+2H]	TALHGVK(+H2)	363.219	36.2	1.27677e+06
1_2	1_2_01.raw	sp|Q9UKV3|ACINU_HUMAN	Q9UKV3	ACIN1	TALHGVK	C32H56N10O9[M+2H]	TALHGVK(+H2)	363.219	36.2	2.61436e+06
1_3	1_3_01.raw	sp|Q9UKV3|ACINU_HUMAN	Q9UKV3	ACIN1	TALHGVK	C32H56N10O9[M+2H]	TALHGVK(+H2)	363.219	36.2	1.28564e+06
2_1	2_1_01.raw	sp|Q9UKV3|ACINU_HUMAN	Q9UKV3	ACIN1	TALHGVK	C32H56N10O9[M+2H]	TALHGVK(+H2)	363.219	36.2	2.80756e+06
2_2	2_2_01.raw	sp|Q9UKV3|ACINU_HUMAN	Q9UKV3	ACIN1	TALHGVK	C32H56N10O9[M+2H]	TALHGVK(+H2)	363.219	36.2	2.75827e+06
2_3	2_3_01.raw	sp|Q9UKV3|ACINU_HUMAN	Q9UKV3	ACIN1	TALHGVK	C32H56N10O9[M+2H]	TALHGVK(+H2)	363.219	36.2	2.89055e+06
3_1	3_1_01.raw	sp|Q9UKV3|ACINU_HUMAN	Q9UKV3	ACIN1	TALHGVK	C32H56N10O9[M+2H]	TALHGVK(+H2)	363.219	36.2	2.43589e+06
3_2	3_2_01_171223210221.raw	sp|Q9UKV3|ACINU_HUMAN	Q9UKV3	ACIN1	TALHGVK	C32H56N10O9[M+2H]	TALHGVK(+H2)	363.219	36.2	1.7193e+06
3_3	3_3_01.raw	sp|Q9UKV3|ACINU_HUMAN	Q9UKV3	ACIN1	TALHGVK	C32H56N10O9[M+2H]	TALHGVK(+H2)	363.219	36.2	722582
4_1	4_1_01.raw	sp|Q9UKV3|ACINU_HUMAN	Q9UKV3	ACIN1	TALHGVK	C32H56N10O9[M+2H]	TALHGVK(+H2)	363.219	36.2	609193
4_2	4_2_01.raw	sp|Q9UKV3|ACINU_HUMAN	Q9UKV3	ACIN1	TALHGVK	C32H56N10O9[M+2H]	TALHGVK(+H2)	363.219	36.2	2.69034e+06
4_3	4_3_01.raw	sp|Q9UKV3|ACINU_HUMAN	Q9UKV3	ACIN1	TALHGVK	C32H56N10O9[M+2H]	TALHGVK(+H2)	363.219	36.2	2.54536e+06
1_4	1_4_01.raw	sp|Q9UKV3|ACINU_HUMAN	Q9UKV3	ACIN1	TALHGVK	C32H56N10O9[M+2H]	TALHGVK(+H2)	363.219	36.2	377227
1_5	1_5_01.raw	sp|Q9UKV3|ACINU_HUMAN	Q9UKV3	ACIN1	TALHGVK	C32H56N10O9[M+2H]	TALHGVK(+H2)	363.219	36.2	1.65906e+06
1_6	1_6_01.raw	sp|Q9UKV3|ACINU_HUMAN	Q9UKV3	ACIN1	TALHGVK	C32H56N10O9[M+2H]	TALHGVK(+H2)	363.219	36.2	2.60122e+06
2_4	2_4_01.raw	sp|Q9UKV3|ACINU_HUMAN	Q9UKV3	ACIN1	TALHGVK	C32H56N10O9[M+2H]	TALHGVK(+H2)	363.219	36.2	1.30029e+06
2_5	2_5_01.raw	sp|Q9UKV3|ACINU_HUMAN	Q9UKV3	ACIN1	TALHGVK	C32H56N10O9[M+2H]	TALHGVK(+H2)	363.219	36.2	1.29606e+06
2_6	2_6_01.raw	sp|Q9UKV3|ACINU_HUMAN	Q9UKV3	ACIN1	TALHGVK	C32H56N10O9[M+2H]	TALHGVK(+H2)	363.219	36.2	1.1577e+06
3_4	3_4_01.raw	sp|Q9UKV3|ACINU_HUMAN	Q9UKV3	ACIN1	TALHGVK	C32H56N10O9[M+2H]	TALHGVK(+H2)	363.219	36.2	1.03224e+06
3_5	3_5_01.raw	sp|Q9UKV3|ACINU_HUMAN	Q9UKV3	ACIN1	TALHGVK	C32H56N10O9[M+2H]	TALHGVK(+H2)	363.219	36.2	849272
3_6	3_6_01.raw	sp|Q9UKV3|ACINU_HUMAN	Q9UKV3	ACIN1	TALHGVK	C32H56N10O9[M+2H]	TALHGVK(+H2)	363.219	36.2	1.60305e+06
4_4	4_4_01.raw	sp|Q9UKV3|ACINU_HUMAN	Q9UKV3	ACIN1	TALHGVK	C32H56N10O9[M+2H]	TALHGVK(+H2)	363.219	36.2	1.21355e+06
4_5	4_5_01.raw	sp|Q9UKV3|ACINU_HUMAN	Q9UKV3	ACIN1	TALHGVK	C32H56N10O9[M+2H]	TALHGVK(+H2)	363.219	36.2	1.9531e+06
4_6	4_6_01.raw	sp|Q9UKV3|ACINU_HUMAN	Q9UKV3	ACIN1	TALHGVK	C32H56N10O9[M+2H]	TALHGVK(+H2)	363.219	36.2	1.78075e+06
1_7	1_7_01.raw	sp|Q9UKV3|ACINU_HUMAN	Q9UKV3	ACIN1	TALHGVK	C32H56N10O9[M+2H]	TALHGVK(+H2)	363.219	36.2	401903
1_8	1_8_01_171211223541.raw	sp|Q9UKV3|ACINU_HUMAN	Q9UKV3	ACIN1	TALHGVK	C32H56N10O9[M+2H]	TALHGVK(+H2)	363.219	36.2	1.56645e+06
1_9	1_9_01.raw	sp|Q9UKV3|ACINU_HUMAN	Q9UKV3	ACIN1	TALHGVK	C32H56N10O9[M+2H]	TALHGVK(+H2)	363.219	36.2	1.96407e+06
2_7	2_7_01.raw	sp|Q9UKV3|ACINU_HUMAN	Q9UKV3	ACIN1	TALHGVK	C32H56N10O9[M+2H]	TALHGVK(+H2)	363.219	36.2	1.76418e+06
2_8	2_8_01.raw	sp|Q9UKV3|ACINU_HUMAN	Q9UKV3	ACIN1	TALHGVK	C32H56N10O9[M+2H]	TALHGVK(+H2)	363.219	36.2	1.43098e+06
2_9	2_9_01_171217123101.raw	sp|Q9UKV3|ACINU_HUMAN	Q9UKV3	ACIN1	TALHGVK	C32H56N10O9[M+2H]	TALHGVK(+H2)	363.219	36.2	1.29446e+06
3_7	3_7_01.raw	sp|Q9UKV3|ACINU_HUMAN	Q9UKV3	ACIN1	TALHGVK	C32H56N10O9[M+2H]	TALHGVK(+H2)	363.219	36.2	523540
3_8	3_8_01.raw	sp|Q9UKV3|ACINU_HUMAN	Q9UKV3	ACIN1	TALHGVK	C32H56N10O9[M+2H]	TALHGVK(+H2)	363.219	36.2	676091
3_9	3_9_01.raw	sp|Q9UKV3|ACINU_HUMAN	Q9UKV3	ACIN1	TALHGVK	C32H56N10O9[M+2H]	TALHGVK(+H2)	363.219	36.2	2.03548e+06
4_7	4_7_01.raw	sp|Q9UKV3|ACINU_HUMAN	Q9UKV3	ACIN1	TALHGVK	C32H56N10O9[M+2H]	TALHGVK(+H2)	363.219	36.2	2.03332e+06
4_8	4_8_01.raw	sp|Q9UKV3|ACINU_HUMAN	Q9UKV3	ACIN1	TALHGVK	C32H56N10O9[M+2H]	TALHGVK(+H2)	363.219	36.2	1.13734e+06
4_9	4_9_01.raw	sp|Q9UKV3|ACINU_HUMAN	Q9UKV3	ACIN1	TALHGVK	C32H56N10O9[M+2H]	TALHGVK(+H2)	363.219	36.2	2.35576e+06
1_10	1_10_01.raw	sp|Q9UKV3|ACINU_HUMAN	Q9UKV3	ACIN1	TALHGVK	C32H56N10O9[M+2H]	TALHGVK(+H2)	363.219	36.2	2.52382e+06
1_11	1_11_01.raw	sp|Q9UKV3|ACINU_HUMAN	Q9UKV3	ACIN1	TALHGVK	C32H56N10O9[M+2H]	TALHGVK(+H2)	363.219	36.2	332318
1_12	1_12_01.raw	sp|Q9UKV3|ACINU_HUMAN	Q9UKV3	ACIN1	TALHGVK	C32H56N10O9[M+2H]	TALHGVK(+H2)	363.219	36.2	5.60594e+06
2_10	2_10_01.raw	sp|Q9UKV3|ACINU_HUMAN	Q9UKV3	ACIN1	TALHGVK	C32H56N10O9[M+2H]	TALHGVK(+H2)	363.219	36.2	3.68517e+06
2_11	2_11_01_171223040132.raw	sp|Q9UKV3|ACINU_HUMAN	Q9UKV3	ACIN1	TALHGVK	C32H56N10O9[M+2H]	TALHGVK(+H2)	363.219	36.2	3.77437e+06
2_12	2_12_01.raw	sp|Q9UKV3|ACINU_HUMAN	Q9UKV3	ACIN1	TALHGVK	C32H56N10O9[M+2H]	TALHGVK(+H2)	363.219	36.2	2.99025e+06
3_10	3_10_01.raw	sp|Q9UKV3|ACINU_HUMAN	Q9UKV3	ACIN1	TALHGVK	C32H56N10O9[M+2H]	TALHGVK(+H2)	363.219	36.2	2.06757e+06
3_11	3_11_01.raw	sp|Q9UKV3|ACINU_HUMAN	Q9UKV3	ACIN1	TALHGVK	C32H56N10O9[M+2H]	TALHGVK(+H2)	363.219	36.2	1.63514e+06
Chromatograms	FinalList2_2.raw	sp|Q9Y305|ACOT9_HUMAN	Q9Y305	ACOT9	IAFSSTSLLK	C49H83N11O15[M+2H]	IAFSSTSLLK(+H2)	533.811	81.04
GPS01	GPS01_2.raw	sp|Q9Y305|ACOT9_HUMAN	Q9Y305	ACOT9	IAFSSTSLLK	C49H83N11O15[M+2H]	IAFSSTSLLK(+H2)	533.811	81.04	1.06963e+06
GPS02	GPS02_2.raw	sp|Q9Y305|ACOT9_HUMAN	Q9Y305	ACOT9	IAFSSTSLLK	C49H83N11O15[M+2H]	IAFSSTSLLK(+H2)	533.811	81.04	799233
GPS03	GPS03_2.raw	sp|Q9Y305|ACOT9_HUMAN	Q9Y305	ACOT9	IAFSSTSLLK	C49H83N11O15[M+2H]	IAFSSTSLLK(+H2)	533.811	81.04	572857
GPS04	GPS04_2.raw	sp|Q9Y305|ACOT9_HUMAN	Q9Y305	ACOT9	IAFSSTSLLK	C49H83N11O15[M+2H]	IAFSSTSLLK(+H2)	533.811	81.04	810101
GPS05	GPS_05_02.raw	sp|Q9Y305|ACOT9_HUMAN	Q9Y305	ACOT9	IAFSSTSLLK	C49H83N11O15[M+2H]	IAFSSTSLLK(+H2)	533.811	81.04	442995
GPS06	GPS_06_02.raw	sp|Q9Y305|ACOT9_HUMAN	Q9Y305	ACOT9	IAFSSTSLLK	C49H83N11O15[M+2H]	IAFSSTSLLK(+H2)	533.811	81.04	166205
1_1	1_1_02.raw	sp|Q9Y305|ACOT9_HUMAN	Q9Y305	ACOT9	IAFSSTSLLK	C49H83N11O15[M+2H]	IAFSSTSLLK(+H2)	533.811	81.04	4.07498e+06
1_2	1_2_02.raw	sp|Q9Y305|ACOT9_HUMAN	Q9Y305	ACOT9	IAFSSTSLLK	C49H83N11O15[M+2H]	IAFSSTSLLK(+H2)	533.811	81.04	722989
1_3	1_3_02.raw	sp|Q9Y305|ACOT9_HUMAN	Q9Y305	ACOT9	IAFSSTSLLK	C49H83N11O15[M+2H]	IAFSSTSLLK(+H2)	533.811	81.04	985860
2_1	2_1_02.raw	sp|Q9Y305|ACOT9_HUMAN	Q9Y305	ACOT9	IAFSSTSLLK	C49H83N11O15[M+2H]	IAFSSTSLLK(+H2)	533.811	81.04	2.16013e+06
2_2	2_2_02.raw	sp|Q9Y305|ACOT9_HUMAN	Q9Y305	ACOT9	IAFSSTSLLK	C49H83N11O15[M+2H]	IAFSSTSLLK(+H2)	533.811	81.04	317339
2_3	2_3_02.raw	sp|Q9Y305|ACOT9_HUMAN	Q9Y305	ACOT9	IAFSSTSLLK	C49H83N11O15[M+2H]	IAFSSTSLLK(+H2)	533.811	81.04	366335
3_1	3_1_02.raw	sp|Q9Y305|ACOT9_HUMAN	Q9Y305	ACOT9	IAFSSTSLLK	C49H83N11O15[M+2H]	IAFSSTSLLK(+H2)	533.811	81.04	107390
3_2	3_2_02.raw	sp|Q9Y305|ACOT9_HUMAN	Q9Y305	ACOT9	IAFSSTSLLK	C49H83N11O15[M+2H]	IAFSSTSLLK(+H2)	533.811	81.04	288833
3_3	3_3_02.raw	sp|Q9Y305|ACOT9_HUMAN	Q9Y305	ACOT9	IAFSSTSLLK	C49H83N11O15[M+2H]	IAFSSTSLLK(+H2)	533.811	81.04	28778.4
4_1	4_1_02.raw	sp|Q9Y305|ACOT9_HUMAN	Q9Y305	ACOT9	IAFSSTSLLK	C49H83N11O15[M+2H]	IAFSSTSLLK(+H2)	533.811	81.04	36668
4_2	4_2_02.raw	sp|Q9Y305|ACOT9_HUMAN	Q9Y305	ACOT9	IAFSSTSLLK	C49H83N11O15[M+2H]	IAFSSTSLLK(+H2)	533.811	81.04	95471.3
4_3	4_3_02.raw	sp|Q9Y305|ACOT9_HUMAN	Q9Y305	ACOT9	IAFSSTSLLK	C49H83N11O15[M+2H]	IAFSSTSLLK(+H2)	533.811	81.04	12558
1_4	1_4_02.raw	sp|Q9Y305|ACOT9_HUMAN	Q9Y305	ACOT9	IAFSSTSLLK	C49H83N11O15[M+2H]	IAFSSTSLLK(+H2)	533.811	81.04	268062
1_5	1_5_02.raw	sp|Q9Y305|ACOT9_HUMAN	Q9Y305	ACOT9	IAFSSTSLLK	C49H83N11O15[M+2H]	IAFSSTSLLK(+H2)	533.811	81.04	483013
1_6	1_6_02.raw	sp|Q9Y305|ACOT9_HUMAN	Q9Y305	ACOT9	IAFSSTSLLK	C49H83N11O15[M+2H]	IAFSSTSLLK(+H2)	533.811	81.04	576815
2_4	2_4_02.raw	sp|Q9Y305|ACOT9_HUMAN	Q9Y305	ACOT9	IAFSSTSLLK	C49H83N11O15[M+2H]	IAFSSTSLLK(+H2)	533.811	81.04	254400
2_5	2_5_02.raw	sp|Q9Y305|ACOT9_HUMAN	Q9Y305	ACOT9	IAFSSTSLLK	C49H83N11O15[M+2H]	IAFSSTSLLK(+H2)	533.811	81.04	669328
2_6	2_6_02.raw	sp|Q9Y305|ACOT9_HUMAN	Q9Y305	ACOT9	IAFSSTSLLK	C49H83N11O15[M+2H]	IAFSSTSLLK(+H2)	533.811	81.04	767843
3_4	3_4_02.raw	sp|Q9Y305|ACOT9_HUMAN	Q9Y305	ACOT9	IAFSSTSLLK	C49H83N11O15[M+2H]	IAFSSTSLLK(+H2)	533.811	81.04	5298.85
3_5	3_5_02.raw	sp|Q9Y305|ACOT9_HUMAN	Q9Y305	ACOT9	IAFSSTSLLK	C49H83N11O15[M+2H]	IAFSSTSLLK(+H2)	533.811	81.04	29650.7
3_6	3_6_02.raw	sp|Q9Y305|ACOT9_HUMAN	Q9Y305	ACOT9	IAFSSTSLLK	C49H83N11O15[M+2H]	IAFSSTSLLK(+H2)	533.811	81.04	43380.5
4_4	4_4_02.raw	sp|Q9Y305|ACOT9_HUMAN	Q9Y305	ACOT9	IAFSSTSLLK	C49H83N11O15[M+2H]	IAFSSTSLLK(+H2)	533.811	81.04	21698.4
4_5	4_5_02.raw	sp|Q9Y305|ACOT9_HUMAN	Q9Y305	ACOT9	IAFSSTSLLK	C49H83N11O15[M+2H]	IAFSSTSLLK(+H2)	533.811	81.04	38164.1
4_6	4_6_02.raw	sp|Q9Y305|ACOT9_HUMAN	Q9Y305	ACOT9	IAFSSTSLLK	C49H83N11O15[M+2H]	IAFSSTSLLK(+H2)	533.811	81.04	129677
1_7	1_7_02.raw	sp|Q9Y305|ACOT9_HUMAN	Q9Y305	ACOT9	IAFSSTSLLK	C49H83N11O15[M+2H]	IAFSSTSLLK(+H2)	533.811	81.04	154409
1_8	1_8_02.raw	sp|Q9Y305|ACOT9_HUMAN	Q9Y305	ACOT9	IAFSSTSLLK	C49H83N11O15[M+2H]	IAFSSTSLLK(+H2)	533.811	81.04	180956
1_9	1_9_02.raw	sp|Q9Y305|ACOT9_HUMAN	Q9Y305	ACOT9	IAFSSTSLLK	C49H83N11O15[M+2H]	IAFSSTSLLK(+H2)	533.811	81.04	765073
2_7	2_7_02.raw	sp|Q9Y305|ACOT9_HUMAN	Q9Y305	ACOT9	IAFSSTSLLK	C49H83N11O15[M+2H]	IAFSSTSLLK(+H2)	533.811	81.04	477612
2_8	2_8_02.raw	sp|Q9Y305|ACOT9_HUMAN	Q9Y305	ACOT9	IAFSSTSLLK	C49H83N11O15[M+2H]	IAFSSTSLLK(+H2)	533.811	81.04	156862
2_9	2_9_02_171217160937.raw	sp|Q9Y305|ACOT9_HUMAN	Q9Y305	ACOT9	IAFSSTSLLK	C49H83N11O15[M+2H]	IAFSSTSLLK(+H2)	533.811	81.04	382682
3_7	3_7_02.raw	sp|Q9Y305|ACOT9_HUMAN	Q9Y305	ACOT9	IAFSSTSLLK	C49H83N11O15[M+2H]	IAFSSTSLLK(+H2)	533.811	81.04	40608.1
3_8	3_8_02.raw	sp|Q9Y305|ACOT9_HUMAN	Q9Y305	ACOT9	IAFSSTSLLK	C49H83N11O15[M+2H]	IAFSSTSLLK(+H2)	533.811	81.04	42658.3
3_9	3_9_02.raw	sp|Q9Y305|ACOT9_HUMAN	Q9Y305	ACOT9	IAFSSTSLLK	C49H83N11O15[M+2H]	IAFSSTSLLK(+H2)	533.811	81.04	535378
4_7	4_7_02.raw	sp|Q9Y305|ACOT9_HUMAN	Q9Y305	ACOT9	IAFSSTSLLK	C49H83N11O15[M+2H]	IAFSSTSLLK(+H2)	533.811	81.04	35408.7
4_8	4_8_02.raw	sp|Q9Y305|ACOT9_HUMAN	Q9Y305	ACOT9	IAFSSTSLLK	C49H83N11O15[M+2H]	IAFSSTSLLK(+H2)	533.811	81.04	62340.1
4_9	4_9_02.raw	sp|Q9Y305|ACOT9_HUMAN	Q9Y305	ACOT9	IAFSSTSLLK	C49H83N11O15[M+2H]	IAFSSTSLLK(+H2)	533.811	81.04	18899.9
1_10	1_10_02.raw	sp|Q9Y305|ACOT9_HUMAN	Q9Y305	ACOT9	IAFSSTSLLK	C49H83N11O15[M+2H]	IAFSSTSLLK(+H2)	533.811	81.04	627049
1_11	1_11_02.raw	sp|Q9Y305|ACOT9_HUMAN	Q9Y305	ACOT9	IAFSSTSLLK	C49H83N11O15[M+2H]	IAFSSTSLLK(+H2)	533.811	81.04	1.80506e+07
1_12	1_12_02.raw	sp|Q9Y305|ACOT9_HUMAN	Q9Y305	ACOT9	IAFSSTSLLK	C49H83N11O15[M+2H]	IAFSSTSLLK(+H2)	533.811	81.04	619392
2_10	2_10_02.raw	sp|Q9Y305|ACOT9_HUMAN	Q9Y305	ACOT9	IAFSSTSLLK	C49H83N11O15[M+2H]	IAFSSTSLLK(+H2)	533.811	81.04	403317
2_11	2_11_02.raw	sp|Q9Y305|ACOT9_HUMAN	Q9Y305	ACOT9	IAFSSTSLLK	C49H83N11O15[M+2H]	IAFSSTSLLK(+H2)	533.811	81.04	229758
2_12	2_12_02.raw	sp|Q9Y305|ACOT9_HUMAN	Q9Y305	ACOT9	IAFSSTSLLK	C49H83N11O15[M+2H]	IAFSSTSLLK(+H2)	533.811	81.04	428575
3_10	3_10_02.raw	sp|Q9Y305|ACOT9_HUMAN	Q9Y305	ACOT9	IAFSSTSLLK	C49H83N11O15[M+2H]	IAFSSTSLLK(+H2)	533.811	81.04	139881
3_11	3_11_02.raw	sp|Q9Y305|ACOT9_HUMAN	Q9Y305	ACOT9	IAFSSTSLLK	C49H83N11O15[M+2H]	IAFSSTSLLK(+H2)	533.811	81.04	20511.8
Chromatograms	FinalList2_2.raw	sp|Q9Y305|ACOT9_HUMAN	Q9Y305	ACOT9	VHSEVASLQEK	C52H87N15O19[M+2H]	VHSEVASLQEK(+H2)	613.822	41.39
GPS01	GPS01_1.raw	sp|Q9Y305|ACOT9_HUMAN	Q9Y305	ACOT9	VHSEVASLQEK	C52H87N15O19[M+2H]	VHSEVASLQEK(+H2)	613.822	41.39	554223
GPS02	GPS02_1.raw	sp|Q9Y305|ACOT9_HUMAN	Q9Y305	ACOT9	VHSEVASLQEK	C52H87N15O19[M+2H]	VHSEVASLQEK(+H2)	613.822	41.39	672140
GPS03	GPS03_1.raw	sp|Q9Y305|ACOT9_HUMAN	Q9Y305	ACOT9	VHSEVASLQEK	C52H87N15O19[M+2H]	VHSEVASLQEK(+H2)	613.822	41.39	766751
GPS04	GPS04_1.raw	sp|Q9Y305|ACOT9_HUMAN	Q9Y305	ACOT9	VHSEVASLQEK	C52H87N15O19[M+2H]	VHSEVASLQEK(+H2)	613.822	41.39	707604
GPS05	GPS_05_01.raw	sp|Q9Y305|ACOT9_HUMAN	Q9Y305	ACOT9	VHSEVASLQEK	C52H87N15O19[M+2H]	VHSEVASLQEK(+H2)	613.822	41.39	841766
GPS06	GPS_06_01.raw	sp|Q9Y305|ACOT9_HUMAN	Q9Y305	ACOT9	VHSEVASLQEK	C52H87N15O19[M+2H]	VHSEVASLQEK(+H2)	613.822	41.39	743377
1_1	1_1_01.raw	sp|Q9Y305|ACOT9_HUMAN	Q9Y305	ACOT9	VHSEVASLQEK	C52H87N15O19[M+2H]	VHSEVASLQEK(+H2)	613.822	41.39	2.22611e+06
1_2	1_2_01.raw	sp|Q9Y305|ACOT9_HUMAN	Q9Y305	ACOT9	VHSEVASLQEK	C52H87N15O19[M+2H]	VHSEVASLQEK(+H2)	613.822	41.39	633024
1_3	1_3_01.raw	sp|Q9Y305|ACOT9_HUMAN	Q9Y305	ACOT9	VHSEVASLQEK	C52H87N15O19[M+2H]	VHSEVASLQEK(+H2)	613.822	41.39	714535
2_1	2_1_01.raw	sp|Q9Y305|ACOT9_HUMAN	Q9Y305	ACOT9	VHSEVASLQEK	C52H87N15O19[M+2H]	VHSEVASLQEK(+H2)	613.822	41.39	1.36049e+06
2_2	2_2_01.raw	sp|Q9Y305|ACOT9_HUMAN	Q9Y305	ACOT9	VHSEVASLQEK	C52H87N15O19[M+2H]	VHSEVASLQEK(+H2)	613.822	41.39	393889
2_3	2_3_01.raw	sp|Q9Y305|ACOT9_HUMAN	Q9Y305	ACOT9	VHSEVASLQEK	C52H87N15O19[M+2H]	VHSEVASLQEK(+H2)	613.822	41.39	510033
3_1	3_1_01.raw	sp|Q9Y305|ACOT9_HUMAN	Q9Y305	ACOT9	VHSEVASLQEK	C52H87N15O19[M+2H]	VHSEVASLQEK(+H2)	613.822	41.39	373211
3_2	3_2_01_171223210221.raw	sp|Q9Y305|ACOT9_HUMAN	Q9Y305	ACOT9	VHSEVASLQEK	C52H87N15O19[M+2H]	VHSEVASLQEK(+H2)	613.822	41.39	505497
3_3	3_3_01.raw	sp|Q9Y305|ACOT9_HUMAN	Q9Y305	ACOT9	VHSEVASLQEK	C52H87N15O19[M+2H]	VHSEVASLQEK(+H2)	613.822	41.39	616769
4_1	4_1_01.raw	sp|Q9Y305|ACOT9_HUMAN	Q9Y305	ACOT9	VHSEVASLQEK	C52H87N15O19[M+2H]	VHSEVASLQEK(+H2)	613.822	41.39	95712.2
4_2	4_2_01.raw	sp|Q9Y305|ACOT9_HUMAN	Q9Y305	ACOT9	VHSEVASLQEK	C52H87N15O19[M+2H]	VHSEVASLQEK(+H2)	613.822	41.39	457873
4_3	4_3_01.raw	sp|Q9Y305|ACOT9_HUMAN	Q9Y305	ACOT9	VHSEVASLQEK	C52H87N15O19[M+2H]	VHSEVASLQEK(+H2)	613.822	41.39	260557
1_4	1_4_01.raw	sp|Q9Y305|ACOT9_HUMAN	Q9Y305	ACOT9	VHSEVASLQEK	C52H87N15O19[M+2H]	VHSEVASLQEK(+H2)	613.822	41.39	296183
1_5	1_5_01.raw	sp|Q9Y305|ACOT9_HUMAN	Q9Y305	ACOT9	VHSEVASLQEK	C52H87N15O19[M+2H]	VHSEVASLQEK(+H2)	613.822	41.39	750798
1_6	1_6_01.raw	sp|Q9Y305|ACOT9_HUMAN	Q9Y305	ACOT9	VHSEVASLQEK	C52H87N15O19[M+2H]	VHSEVASLQEK(+H2)	613.822	41.39	775924
2_4	2_4_01.raw	sp|Q9Y305|ACOT9_HUMAN	Q9Y305	ACOT9	VHSEVASLQEK	C52H87N15O19[M+2H]	VHSEVASLQEK(+H2)	613.822	41.39	580406
2_5	2_5_01.raw	sp|Q9Y305|ACOT9_HUMAN	Q9Y305	ACOT9	VHSEVASLQEK	C52H87N15O19[M+2H]	VHSEVASLQEK(+H2)	613.822	41.39	752793
2_6	2_6_01.raw	sp|Q9Y305|ACOT9_HUMAN	Q9Y305	ACOT9	VHSEVASLQEK	C52H87N15O19[M+2H]	VHSEVASLQEK(+H2)	613.822	41.39	791801
3_4	3_4_01.raw	sp|Q9Y305|ACOT9_HUMAN	Q9Y305	ACOT9	VHSEVASLQEK	C52H87N15O19[M+2H]	VHSEVASLQEK(+H2)	613.822	41.39	879367
3_5	3_5_01.raw	sp|Q9Y305|ACOT9_HUMAN	Q9Y305	ACOT9	VHSEVASLQEK	C52H87N15O19[M+2H]	VHSEVASLQEK(+H2)	613.822	41.39	434225
3_6	3_6_01.raw	sp|Q9Y305|ACOT9_HUMAN	Q9Y305	ACOT9	VHSEVASLQEK	C52H87N15O19[M+2H]	VHSEVASLQEK(+H2)	613.822	41.39	432821
4_4	4_4_01.raw	sp|Q9Y305|ACOT9_HUMAN	Q9Y305	ACOT9	VHSEVASLQEK	C52H87N15O19[M+2H]	VHSEVASLQEK(+H2)	613.822	41.39	542369
4_5	4_5_01.raw	sp|Q9Y305|ACOT9_HUMAN	Q9Y305	ACOT9	VHSEVASLQEK	C52H87N15O19[M+2H]	VHSEVASLQEK(+H2)	613.822	41.39	241846
4_6	4_6_01.raw	sp|Q9Y305|ACOT9_HUMAN	Q9Y305	ACOT9	VHSEVASLQEK	C52H87N15O19[M+2H]	VHSEVASLQEK(+H2)	613.822	41.39	166956
1_7	1_7_01.raw	sp|Q9Y305|ACOT9_HUMAN	Q9Y305	ACOT9	VHSEVASLQEK	C52H87N15O19[M+2H]	VHSEVASLQEK(+H2)	613.822	41.39	413836
1_8	1_8_01_171211223541.raw	sp|Q9Y305|ACOT9_HUMAN	Q9Y305	ACOT9	VHSEVASLQEK	C52H87N15O19[M+2H]	VHSEVASLQEK(+H2)	613.822	41.39	436147
1_9	1_9_01.raw	sp|Q9Y305|ACOT9_HUMAN	Q9Y305	ACOT9	VHSEVASLQEK	C52H87N15O19[M+2H]	VHSEVASLQEK(+H2)	613.822	41.39	735804
2_7	2_7_01.raw	sp|Q9Y305|ACOT9_HUMAN	Q9Y305	ACOT9	VHSEVASLQEK	C52H87N15O19[M+2H]	VHSEVASLQEK(+H2)	613.822	41.39	471923
2_8	2_8_01.raw	sp|Q9Y305|ACOT9_HUMAN	Q9Y305	ACOT9	VHSEVASLQEK	C52H87N15O19[M+2H]	VHSEVASLQEK(+H2)	613.822	41.39	393028
2_9	2_9_01_171217123101.raw	sp|Q9Y305|ACOT9_HUMAN	Q9Y305	ACOT9	VHSEVASLQEK	C52H87N15O19[M+2H]	VHSEVASLQEK(+H2)	613.822	41.39	556855
3_7	3_7_01.raw	sp|Q9Y305|ACOT9_HUMAN	Q9Y305	ACOT9	VHSEVASLQEK	C52H87N15O19[M+2H]	VHSEVASLQEK(+H2)	613.822	41.39	323268
3_8	3_8_01.raw	sp|Q9Y305|ACOT9_HUMAN	Q9Y305	ACOT9	VHSEVASLQEK	C52H87N15O19[M+2H]	VHSEVASLQEK(+H2)	613.822	41.39	330764
3_9	3_9_01.raw	sp|Q9Y305|ACOT9_HUMAN	Q9Y305	ACOT9	VHSEVASLQEK	C52H87N15O19[M+2H]	VHSEVASLQEK(+H2)	613.822	41.39	680529
4_7	4_7_01.raw	sp|Q9Y305|ACOT9_HUMAN	Q9Y305	ACOT9	VHSEVASLQEK	C52H87N15O19[M+2H]	VHSEVASLQEK(+H2)	613.822	41.39	407666
4_8	4_8_01.raw	sp|Q9Y305|ACOT9_HUMAN	Q9Y305	ACOT9	VHSEVASLQEK	C52H87N15O19[M+2H]	VHSEVASLQEK(+H2)	613.822	41.39	530010
4_9	4_9_01.raw	sp|Q9Y305|ACOT9_HUMAN	Q9Y305	ACOT9	VHSEVASLQEK	C52H87N15O19[M+2H]	VHSEVASLQEK(+H2)	613.822	41.39	244442
1_10	1_10_01.raw	sp|Q9Y305|ACOT9_HUMAN	Q9Y305	ACOT9	VHSEVASLQEK	C52H87N15O19[M+2H]	VHSEVASLQEK(+H2)	613.822	41.39	859005
1_11	1_11_01.raw	sp|Q9Y305|ACOT9_HUMAN	Q9Y305	ACOT9	VHSEVASLQEK	C52H87N15O19[M+2H]	VHSEVASLQEK(+H2)	613.822	41.39	1.03345e+07
1_12	1_12_01.raw	sp|Q9Y305|ACOT9_HUMAN	Q9Y305	ACOT9	VHSEVASLQEK	C52H87N15O19[M+2H]	VHSEVASLQEK(+H2)	613.822	41.39	535868
2_10	2_10_01.raw	sp|Q9Y305|ACOT9_HUMAN	Q9Y305	ACOT9	VHSEVASLQEK	C52H87N15O19[M+2H]	VHSEVASLQEK(+H2)	613.822	41.39	552197
2_11	2_11_01_171223040132.raw	sp|Q9Y305|ACOT9_HUMAN	Q9Y305	ACOT9	VHSEVASLQEK	C52H87N15O19[M+2H]	VHSEVASLQEK(+H2)	613.822	41.39	431281
2_12	2_12_01.raw	sp|Q9Y305|ACOT9_HUMAN	Q9Y305	ACOT9	VHSEVASLQEK	C52H87N15O19[M+2H]	VHSEVASLQEK(+H2)	613.822	41.39	487569
3_10	3_10_01.raw	sp|Q9Y305|ACOT9_HUMAN	Q9Y305	ACOT9	VHSEVASLQEK	C52H87N15O19[M+2H]	VHSEVASLQEK(+H2)	613.822	41.39	519960
3_11	3_11_01.raw	sp|Q9Y305|ACOT9_HUMAN	Q9Y305	ACOT9	VHSEVASLQEK	C52H87N15O19[M+2H]	VHSEVASLQEK(+H2)	613.822	41.39	222160
Chromatograms	FinalList2_1.raw	sp|P55265|DSRAD_HUMAN	P55265	ADAR	YLNTNPVGGLLEYAR	C76H118N20O23[M+2H]	YLNTNPVGGLLEYAR(+H2)	840.441	103.55
GPS01	GPS01_2.raw	sp|P55265|DSRAD_HUMAN	P55265	ADAR	YLNTNPVGGLLEYAR	C76H118N20O23[M+2H]	YLNTNPVGGLLEYAR(+H2)	840.441	103.55	7.85092e+06
GPS02	GPS02_2.raw	sp|P55265|DSRAD_HUMAN	P55265	ADAR	YLNTNPVGGLLEYAR	C76H118N20O23[M+2H]	YLNTNPVGGLLEYAR(+H2)	840.441	103.55	6.30093e+06
GPS03	GPS03_2.raw	sp|P55265|DSRAD_HUMAN	P55265	ADAR	YLNTNPVGGLLEYAR	C76H118N20O23[M+2H]	YLNTNPVGGLLEYAR(+H2)	840.441	103.55	1.01649e+07
GPS04	GPS04_2.raw	sp|P55265|DSRAD_HUMAN	P55265	ADAR	YLNTNPVGGLLEYAR	C76H118N20O23[M+2H]	YLNTNPVGGLLEYAR(+H2)	840.441	103.55	1.14268e+07
GPS05	GPS_05_02.raw	sp|P55265|DSRAD_HUMAN	P55265	ADAR	YLNTNPVGGLLEYAR	C76H118N20O23[M+2H]	YLNTNPVGGLLEYAR(+H2)	840.441	103.55	1.72628e+07
GPS06	GPS_06_02.raw	sp|P55265|DSRAD_HUMAN	P55265	ADAR	YLNTNPVGGLLEYAR	C76H118N20O23[M+2H]	YLNTNPVGGLLEYAR(+H2)	840.441	103.55	1.40138e+07
1_1	1_1_02.raw	sp|P55265|DSRAD_HUMAN	P55265	ADAR	YLNTNPVGGLLEYAR	C76H118N20O23[M+2H]	YLNTNPVGGLLEYAR(+H2)	840.441	103.55	7.47002e+06
1_2	1_2_02.raw	sp|P55265|DSRAD_HUMAN	P55265	ADAR	YLNTNPVGGLLEYAR	C76H118N20O23[M+2H]	YLNTNPVGGLLEYAR(+H2)	840.441	103.55	8.62528e+06
1_3	1_3_02.raw	sp|P55265|DSRAD_HUMAN	P55265	ADAR	YLNTNPVGGLLEYAR	C76H118N20O23[M+2H]	YLNTNPVGGLLEYAR(+H2)	840.441	103.55	6.06863e+06
2_1	2_1_02.raw	sp|P55265|DSRAD_HUMAN	P55265	ADAR	YLNTNPVGGLLEYAR	C76H118N20O23[M+2H]	YLNTNPVGGLLEYAR(+H2)	840.441	103.55	1.14655e+07
2_2	2_2_02.raw	sp|P55265|DSRAD_HUMAN	P55265	ADAR	YLNTNPVGGLLEYAR	C76H118N20O23[M+2H]	YLNTNPVGGLLEYAR(+H2)	840.441	103.55	6.03038e+06
2_3	2_3_02.raw	sp|P55265|DSRAD_HUMAN	P55265	ADAR	YLNTNPVGGLLEYAR	C76H118N20O23[M+2H]	YLNTNPVGGLLEYAR(+H2)	840.441	103.55	9.45322e+06
3_1	3_1_02.raw	sp|P55265|DSRAD_HUMAN	P55265	ADAR	YLNTNPVGGLLEYAR	C76H118N20O23[M+2H]	YLNTNPVGGLLEYAR(+H2)	840.441	103.55	9.80254e+06
3_2	3_2_02.raw	sp|P55265|DSRAD_HUMAN	P55265	ADAR	YLNTNPVGGLLEYAR	C76H118N20O23[M+2H]	YLNTNPVGGLLEYAR(+H2)	840.441	103.55	9.08564e+06
3_3	3_3_02.raw	sp|P55265|DSRAD_HUMAN	P55265	ADAR	YLNTNPVGGLLEYAR	C76H118N20O23[M+2H]	YLNTNPVGGLLEYAR(+H2)	840.441	103.55	5.7712e+06
4_1	4_1_02.raw	sp|P55265|DSRAD_HUMAN	P55265	ADAR	YLNTNPVGGLLEYAR	C76H118N20O23[M+2H]	YLNTNPVGGLLEYAR(+H2)	840.441	103.55	1.31106e+07
4_2	4_2_02.raw	sp|P55265|DSRAD_HUMAN	P55265	ADAR	YLNTNPVGGLLEYAR	C76H118N20O23[M+2H]	YLNTNPVGGLLEYAR(+H2)	840.441	103.55	1.05165e+07
4_3	4_3_02.raw	sp|P55265|DSRAD_HUMAN	P55265	ADAR	YLNTNPVGGLLEYAR	C76H118N20O23[M+2H]	YLNTNPVGGLLEYAR(+H2)	840.441	103.55	1.61328e+07
1_4	1_4_02.raw	sp|P55265|DSRAD_HUMAN	P55265	ADAR	YLNTNPVGGLLEYAR	C76H118N20O23[M+2H]	YLNTNPVGGLLEYAR(+H2)	840.441	103.55	928653
1_5	1_5_02.raw	sp|P55265|DSRAD_HUMAN	P55265	ADAR	YLNTNPVGGLLEYAR	C76H118N20O23[M+2H]	YLNTNPVGGLLEYAR(+H2)	840.441	103.55	7.09123e+06
1_6	1_6_02.raw	sp|P55265|DSRAD_HUMAN	P55265	ADAR	YLNTNPVGGLLEYAR	C76H118N20O23[M+2H]	YLNTNPVGGLLEYAR(+H2)	840.441	103.55	8.66202e+06
2_4	2_4_02.raw	sp|P55265|DSRAD_HUMAN	P55265	ADAR	YLNTNPVGGLLEYAR	C76H118N20O23[M+2H]	YLNTNPVGGLLEYAR(+H2)	840.441	103.55	9.70092e+06
2_5	2_5_02.raw	sp|P55265|DSRAD_HUMAN	P55265	ADAR	YLNTNPVGGLLEYAR	C76H118N20O23[M+2H]	YLNTNPVGGLLEYAR(+H2)	840.441	103.55	1.74322e+07
2_6	2_6_02.raw	sp|P55265|DSRAD_HUMAN	P55265	ADAR	YLNTNPVGGLLEYAR	C76H118N20O23[M+2H]	YLNTNPVGGLLEYAR(+H2)	840.441	103.55	1.67834e+07
3_4	3_4_02.raw	sp|P55265|DSRAD_HUMAN	P55265	ADAR	YLNTNPVGGLLEYAR	C76H118N20O23[M+2H]	YLNTNPVGGLLEYAR(+H2)	840.441	103.55	7332612
3_5	3_5_02.raw	sp|P55265|DSRAD_HUMAN	P55265	ADAR	YLNTNPVGGLLEYAR	C76H118N20O23[M+2H]	YLNTNPVGGLLEYAR(+H2)	840.441	103.55	8.03998e+06
3_6	3_6_02.raw	sp|P55265|DSRAD_HUMAN	P55265	ADAR	YLNTNPVGGLLEYAR	C76H118N20O23[M+2H]	YLNTNPVGGLLEYAR(+H2)	840.441	103.55	9.68613e+06
4_4	4_4_02.raw	sp|P55265|DSRAD_HUMAN	P55265	ADAR	YLNTNPVGGLLEYAR	C76H118N20O23[M+2H]	YLNTNPVGGLLEYAR(+H2)	840.441	103.55	6.97038e+06
4_5	4_5_02.raw	sp|P55265|DSRAD_HUMAN	P55265	ADAR	YLNTNPVGGLLEYAR	C76H118N20O23[M+2H]	YLNTNPVGGLLEYAR(+H2)	840.441	103.55	8.82116e+06
4_6	4_6_02.raw	sp|P55265|DSRAD_HUMAN	P55265	ADAR	YLNTNPVGGLLEYAR	C76H118N20O23[M+2H]	YLNTNPVGGLLEYAR(+H2)	840.441	103.55	1.49355e+07
1_7	1_7_02.raw	sp|P55265|DSRAD_HUMAN	P55265	ADAR	YLNTNPVGGLLEYAR	C76H118N20O23[M+2H]	YLNTNPVGGLLEYAR(+H2)	840.441	103.55	2.1619e+06
1_8	1_8_02.raw	sp|P55265|DSRAD_HUMAN	P55265	ADAR	YLNTNPVGGLLEYAR	C76H118N20O23[M+2H]	YLNTNPVGGLLEYAR(+H2)	840.441	103.55	1.89236e+06
1_9	1_9_02.raw	sp|P55265|DSRAD_HUMAN	P55265	ADAR	YLNTNPVGGLLEYAR	C76H118N20O23[M+2H]	YLNTNPVGGLLEYAR(+H2)	840.441	103.55	6.52432e+06
2_7	2_7_02.raw	sp|P55265|DSRAD_HUMAN	P55265	ADAR	YLNTNPVGGLLEYAR	C76H118N20O23[M+2H]	YLNTNPVGGLLEYAR(+H2)	840.441	103.55	6.31859e+06
2_8	2_8_02.raw	sp|P55265|DSRAD_HUMAN	P55265	ADAR	YLNTNPVGGLLEYAR	C76H118N20O23[M+2H]	YLNTNPVGGLLEYAR(+H2)	840.441	103.55	1.86595e+07
2_9	2_9_02_171217160937.raw	sp|P55265|DSRAD_HUMAN	P55265	ADAR	YLNTNPVGGLLEYAR	C76H118N20O23[M+2H]	YLNTNPVGGLLEYAR(+H2)	840.441	103.55	9.41487e+06
3_7	3_7_02.raw	sp|P55265|DSRAD_HUMAN	P55265	ADAR	YLNTNPVGGLLEYAR	C76H118N20O23[M+2H]	YLNTNPVGGLLEYAR(+H2)	840.441	103.55	3.06131e+06
3_8	3_8_02.raw	sp|P55265|DSRAD_HUMAN	P55265	ADAR	YLNTNPVGGLLEYAR	C76H118N20O23[M+2H]	YLNTNPVGGLLEYAR(+H2)	840.441	103.55	5.77183e+06
3_9	3_9_02.raw	sp|P55265|DSRAD_HUMAN	P55265	ADAR	YLNTNPVGGLLEYAR	C76H118N20O23[M+2H]	YLNTNPVGGLLEYAR(+H2)	840.441	103.55	1.93607e+07
4_7	4_7_02.raw	sp|P55265|DSRAD_HUMAN	P55265	ADAR	YLNTNPVGGLLEYAR	C76H118N20O23[M+2H]	YLNTNPVGGLLEYAR(+H2)	840.441	103.55	8.21717e+06
4_8	4_8_02.raw	sp|P55265|DSRAD_HUMAN	P55265	ADAR	YLNTNPVGGLLEYAR	C76H118N20O23[M+2H]	YLNTNPVGGLLEYAR(+H2)	840.441	103.55	0
4_9	4_9_02.raw	sp|P55265|DSRAD_HUMAN	P55265	ADAR	YLNTNPVGGLLEYAR	C76H118N20O23[M+2H]	YLNTNPVGGLLEYAR(+H2)	840.441	103.55	9.17474e+06
1_10	1_10_02.raw	sp|P55265|DSRAD_HUMAN	P55265	ADAR	YLNTNPVGGLLEYAR	C76H118N20O23[M+2H]	YLNTNPVGGLLEYAR(+H2)	840.441	103.55	6.81384e+06
1_11	1_11_02.raw	sp|P55265|DSRAD_HUMAN	P55265	ADAR	YLNTNPVGGLLEYAR	C76H118N20O23[M+2H]	YLNTNPVGGLLEYAR(+H2)	840.441	103.55	2.38658e+06
1_12	1_12_02.raw	sp|P55265|DSRAD_HUMAN	P55265	ADAR	YLNTNPVGGLLEYAR	C76H118N20O23[M+2H]	YLNTNPVGGLLEYAR(+H2)	840.441	103.55	1.04628e+07
2_10	2_10_02.raw	sp|P55265|DSRAD_HUMAN	P55265	ADAR	YLNTNPVGGLLEYAR	C76H118N20O23[M+2H]	YLNTNPVGGLLEYAR(+H2)	840.441	103.55	6.92405e+06
2_11	2_11_02.raw	sp|P55265|DSRAD_HUMAN	P55265	ADAR	YLNTNPVGGLLEYAR	C76H118N20O23[M+2H]	YLNTNPVGGLLEYAR(+H2)	840.441	103.55	1.17533e+07
2_12	2_12_02.raw	sp|P55265|DSRAD_HUMAN	P55265	ADAR	YLNTNPVGGLLEYAR	C76H118N20O23[M+2H]	YLNTNPVGGLLEYAR(+H2)	840.441	103.55	2.14655e+07
3_10	3_10_02.raw	sp|P55265|DSRAD_HUMAN	P55265	ADAR	YLNTNPVGGLLEYAR	C76H118N20O23[M+2H]	YLNTNPVGGLLEYAR(+H2)	840.441	103.55	2.53549e+06
3_11	3_11_02.raw	sp|P55265|DSRAD_HUMAN	P55265	ADAR	YLNTNPVGGLLEYAR	C76H118N20O23[M+2H]	YLNTNPVGGLLEYAR(+H2)	840.441	103.55	8.25595e+06
Chromatograms	FinalList2_2.raw	sp|P55265|DSRAD_HUMAN	P55265	ADAR	GETVNDC[+57]HAEIISR	C64H105N21O25S[M+3H]	GETVNDCHAEIISR(+H3)	534.251	48.07
GPS01	GPS01_1.raw	sp|P55265|DSRAD_HUMAN	P55265	ADAR	GETVNDC[+57]HAEIISR	C64H105N21O25S[M+3H]	GETVNDCHAEIISR(+H3)	534.251	48.07	4.03969e+06
GPS02	GPS02_1.raw	sp|P55265|DSRAD_HUMAN	P55265	ADAR	GETVNDC[+57]HAEIISR	C64H105N21O25S[M+3H]	GETVNDCHAEIISR(+H3)	534.251	48.07	3.68673e+06
GPS03	GPS03_1.raw	sp|P55265|DSRAD_HUMAN	P55265	ADAR	GETVNDC[+57]HAEIISR	C64H105N21O25S[M+3H]	GETVNDCHAEIISR(+H3)	534.251	48.07	3.44872e+06
GPS04	GPS04_1.raw	sp|P55265|DSRAD_HUMAN	P55265	ADAR	GETVNDC[+57]HAEIISR	C64H105N21O25S[M+3H]	GETVNDCHAEIISR(+H3)	534.251	48.07	3.66037e+06
GPS05	GPS_05_01.raw	sp|P55265|DSRAD_HUMAN	P55265	ADAR	GETVNDC[+57]HAEIISR	C64H105N21O25S[M+3H]	GETVNDCHAEIISR(+H3)	534.251	48.07	3.16703e+06
GPS06	GPS_06_01.raw	sp|P55265|DSRAD_HUMAN	P55265	ADAR	GETVNDC[+57]HAEIISR	C64H105N21O25S[M+3H]	GETVNDCHAEIISR(+H3)	534.251	48.07	3.688e+06
1_1	1_1_01.raw	sp|P55265|DSRAD_HUMAN	P55265	ADAR	GETVNDC[+57]HAEIISR	C64H105N21O25S[M+3H]	GETVNDCHAEIISR(+H3)	534.251	48.07	4.69454e+06
1_2	1_2_01.raw	sp|P55265|DSRAD_HUMAN	P55265	ADAR	GETVNDC[+57]HAEIISR	C64H105N21O25S[M+3H]	GETVNDCHAEIISR(+H3)	534.251	48.07	4.2104e+06
1_3	1_3_01.raw	sp|P55265|DSRAD_HUMAN	P55265	ADAR	GETVNDC[+57]HAEIISR	C64H105N21O25S[M+3H]	GETVNDCHAEIISR(+H3)	534.251	48.07	4.18384e+06
2_1	2_1_01.raw	sp|P55265|DSRAD_HUMAN	P55265	ADAR	GETVNDC[+57]HAEIISR	C64H105N21O25S[M+3H]	GETVNDCHAEIISR(+H3)	534.251	48.07	4.71044e+06
2_2	2_2_01.raw	sp|P55265|DSRAD_HUMAN	P55265	ADAR	GETVNDC[+57]HAEIISR	C64H105N21O25S[M+3H]	GETVNDCHAEIISR(+H3)	534.251	48.07	2.06113e+06
2_3	2_3_01.raw	sp|P55265|DSRAD_HUMAN	P55265	ADAR	GETVNDC[+57]HAEIISR	C64H105N21O25S[M+3H]	GETVNDCHAEIISR(+H3)	534.251	48.07	3.1693e+06
3_1	3_1_01.raw	sp|P55265|DSRAD_HUMAN	P55265	ADAR	GETVNDC[+57]HAEIISR	C64H105N21O25S[M+3H]	GETVNDCHAEIISR(+H3)	534.251	48.07	5.36189e+06
3_2	3_2_01_171223210221.raw	sp|P55265|DSRAD_HUMAN	P55265	ADAR	GETVNDC[+57]HAEIISR	C64H105N21O25S[M+3H]	GETVNDCHAEIISR(+H3)	534.251	48.07	4.30395e+06
3_3	3_3_01.raw	sp|P55265|DSRAD_HUMAN	P55265	ADAR	GETVNDC[+57]HAEIISR	C64H105N21O25S[M+3H]	GETVNDCHAEIISR(+H3)	534.251	48.07	2.57219e+06
4_1	4_1_01.raw	sp|P55265|DSRAD_HUMAN	P55265	ADAR	GETVNDC[+57]HAEIISR	C64H105N21O25S[M+3H]	GETVNDCHAEIISR(+H3)	534.251	48.07	1.5129e+06
4_2	4_2_01.raw	sp|P55265|DSRAD_HUMAN	P55265	ADAR	GETVNDC[+57]HAEIISR	C64H105N21O25S[M+3H]	GETVNDCHAEIISR(+H3)	534.251	48.07	3.40971e+06
4_3	4_3_01.raw	sp|P55265|DSRAD_HUMAN	P55265	ADAR	GETVNDC[+57]HAEIISR	C64H105N21O25S[M+3H]	GETVNDCHAEIISR(+H3)	534.251	48.07	4.8988e+06
1_4	1_4_01.raw	sp|P55265|DSRAD_HUMAN	P55265	ADAR	GETVNDC[+57]HAEIISR	C64H105N21O25S[M+3H]	GETVNDCHAEIISR(+H3)	534.251	48.07	406943
1_5	1_5_01.raw	sp|P55265|DSRAD_HUMAN	P55265	ADAR	GETVNDC[+57]HAEIISR	C64H105N21O25S[M+3H]	GETVNDCHAEIISR(+H3)	534.251	48.07	3.37519e+06
1_6	1_6_01.raw	sp|P55265|DSRAD_HUMAN	P55265	ADAR	GETVNDC[+57]HAEIISR	C64H105N21O25S[M+3H]	GETVNDCHAEIISR(+H3)	534.251	48.07	4.54441e+06
2_4	2_4_01.raw	sp|P55265|DSRAD_HUMAN	P55265	ADAR	GETVNDC[+57]HAEIISR	C64H105N21O25S[M+3H]	GETVNDCHAEIISR(+H3)	534.251	48.07	4.00964e+06
2_5	2_5_01.raw	sp|P55265|DSRAD_HUMAN	P55265	ADAR	GETVNDC[+57]HAEIISR	C64H105N21O25S[M+3H]	GETVNDCHAEIISR(+H3)	534.251	48.07	5.61661e+06
2_6	2_6_01.raw	sp|P55265|DSRAD_HUMAN	P55265	ADAR	GETVNDC[+57]HAEIISR	C64H105N21O25S[M+3H]	GETVNDCHAEIISR(+H3)	534.251	48.07	4.82689e+06
3_4	3_4_01.raw	sp|P55265|DSRAD_HUMAN	P55265	ADAR	GETVNDC[+57]HAEIISR	C64H105N21O25S[M+3H]	GETVNDCHAEIISR(+H3)	534.251	48.07	4.49119e+06
3_5	3_5_01.raw	sp|P55265|DSRAD_HUMAN	P55265	ADAR	GETVNDC[+57]HAEIISR	C64H105N21O25S[M+3H]	GETVNDCHAEIISR(+H3)	534.251	48.07	4.11764e+06
3_6	3_6_01.raw	sp|P55265|DSRAD_HUMAN	P55265	ADAR	GETVNDC[+57]HAEIISR	C64H105N21O25S[M+3H]	GETVNDCHAEIISR(+H3)	534.251	48.07	3.53172e+06
4_4	4_4_01.raw	sp|P55265|DSRAD_HUMAN	P55265	ADAR	GETVNDC[+57]HAEIISR	C64H105N21O25S[M+3H]	GETVNDCHAEIISR(+H3)	534.251	48.07	3.54982e+06
4_5	4_5_01.raw	sp|P55265|DSRAD_HUMAN	P55265	ADAR	GETVNDC[+57]HAEIISR	C64H105N21O25S[M+3H]	GETVNDCHAEIISR(+H3)	534.251	48.07	2.42092e+06
4_6	4_6_01.raw	sp|P55265|DSRAD_HUMAN	P55265	ADAR	GETVNDC[+57]HAEIISR	C64H105N21O25S[M+3H]	GETVNDCHAEIISR(+H3)	534.251	48.07	5.10299e+06
1_7	1_7_01.raw	sp|P55265|DSRAD_HUMAN	P55265	ADAR	GETVNDC[+57]HAEIISR	C64H105N21O25S[M+3H]	GETVNDCHAEIISR(+H3)	534.251	48.07	1.1193e+06
1_8	1_8_01_171211223541.raw	sp|P55265|DSRAD_HUMAN	P55265	ADAR	GETVNDC[+57]HAEIISR	C64H105N21O25S[M+3H]	GETVNDCHAEIISR(+H3)	534.251	48.07	880616
1_9	1_9_01.raw	sp|P55265|DSRAD_HUMAN	P55265	ADAR	GETVNDC[+57]HAEIISR	C64H105N21O25S[M+3H]	GETVNDCHAEIISR(+H3)	534.251	48.07	3.48151e+06
2_7	2_7_01.raw	sp|P55265|DSRAD_HUMAN	P55265	ADAR	GETVNDC[+57]HAEIISR	C64H105N21O25S[M+3H]	GETVNDCHAEIISR(+H3)	534.251	48.07	1.79388e+06
2_8	2_8_01.raw	sp|P55265|DSRAD_HUMAN	P55265	ADAR	GETVNDC[+57]HAEIISR	C64H105N21O25S[M+3H]	GETVNDCHAEIISR(+H3)	534.251	48.07	4.13596e+06
2_9	2_9_01_171217123101.raw	sp|P55265|DSRAD_HUMAN	P55265	ADAR	GETVNDC[+57]HAEIISR	C64H105N21O25S[M+3H]	GETVNDCHAEIISR(+H3)	534.251	48.07	3.68964e+06
3_7	3_7_01.raw	sp|P55265|DSRAD_HUMAN	P55265	ADAR	GETVNDC[+57]HAEIISR	C64H105N21O25S[M+3H]	GETVNDCHAEIISR(+H3)	534.251	48.07	1.13082e+06
3_8	3_8_01.raw	sp|P55265|DSRAD_HUMAN	P55265	ADAR	GETVNDC[+57]HAEIISR	C64H105N21O25S[M+3H]	GETVNDCHAEIISR(+H3)	534.251	48.07	3.61272e+06
3_9	3_9_01.raw	sp|P55265|DSRAD_HUMAN	P55265	ADAR	GETVNDC[+57]HAEIISR	C64H105N21O25S[M+3H]	GETVNDCHAEIISR(+H3)	534.251	48.07	7.81133e+06
4_7	4_7_01.raw	sp|P55265|DSRAD_HUMAN	P55265	ADAR	GETVNDC[+57]HAEIISR	C64H105N21O25S[M+3H]	GETVNDCHAEIISR(+H3)	534.251	48.07	4.46223e+06
4_8	4_8_01.raw	sp|P55265|DSRAD_HUMAN	P55265	ADAR	GETVNDC[+57]HAEIISR	C64H105N21O25S[M+3H]	GETVNDCHAEIISR(+H3)	534.251	48.07	3.74863e+06
4_9	4_9_01.raw	sp|P55265|DSRAD_HUMAN	P55265	ADAR	GETVNDC[+57]HAEIISR	C64H105N21O25S[M+3H]	GETVNDCHAEIISR(+H3)	534.251	48.07	2.53116e+06
1_10	1_10_01.raw	sp|P55265|DSRAD_HUMAN	P55265	ADAR	GETVNDC[+57]HAEIISR	C64H105N21O25S[M+3H]	GETVNDCHAEIISR(+H3)	534.251	48.07	3.38581e+06
1_11	1_11_01.raw	sp|P55265|DSRAD_HUMAN	P55265	ADAR	GETVNDC[+57]HAEIISR	C64H105N21O25S[M+3H]	GETVNDCHAEIISR(+H3)	534.251	48.07	3.01689e+06
1_12	1_12_01.raw	sp|P55265|DSRAD_HUMAN	P55265	ADAR	GETVNDC[+57]HAEIISR	C64H105N21O25S[M+3H]	GETVNDCHAEIISR(+H3)	534.251	48.07	5.60582e+06
2_10	2_10_01.raw	sp|P55265|DSRAD_HUMAN	P55265	ADAR	GETVNDC[+57]HAEIISR	C64H105N21O25S[M+3H]	GETVNDCHAEIISR(+H3)	534.251	48.07	2.47763e+06
2_11	2_11_01_171223040132.raw	sp|P55265|DSRAD_HUMAN	P55265	ADAR	GETVNDC[+57]HAEIISR	C64H105N21O25S[M+3H]	GETVNDCHAEIISR(+H3)	534.251	48.07	4.16544e+06
2_12	2_12_01.raw	sp|P55265|DSRAD_HUMAN	P55265	ADAR	GETVNDC[+57]HAEIISR	C64H105N21O25S[M+3H]	GETVNDCHAEIISR(+H3)	534.251	48.07	6.28537e+06
3_10	3_10_01.raw	sp|P55265|DSRAD_HUMAN	P55265	ADAR	GETVNDC[+57]HAEIISR	C64H105N21O25S[M+3H]	GETVNDCHAEIISR(+H3)	534.251	48.07	2.03406e+06
3_11	3_11_01.raw	sp|P55265|DSRAD_HUMAN	P55265	ADAR	GETVNDC[+57]HAEIISR	C64H105N21O25S[M+3H]	GETVNDCHAEIISR(+H3)	534.251	48.07	3.522e+06
Chromatograms	FinalList2_1.raw	sp|P55265|DSRAD_HUMANDouble-strandedRNA-specificadenosinedeaminaseOS=HomosapiensGN=ADARPE=1SV=4	P55265	ADAR	LVDQSGPPHEPK	C57H90N16O19[M+3H]	LVDQSGPPHEPK(+H3)	435.226	39.73
GPS01	GPS01_1.raw	sp|P55265|DSRAD_HUMANDouble-strandedRNA-specificadenosinedeaminaseOS=HomosapiensGN=ADARPE=1SV=4	P55265	ADAR	LVDQSGPPHEPK	C57H90N16O19[M+3H]	LVDQSGPPHEPK(+H3)	435.226	39.73	1.91254e+06
GPS02	GPS02_1.raw	sp|P55265|DSRAD_HUMANDouble-strandedRNA-specificadenosinedeaminaseOS=HomosapiensGN=ADARPE=1SV=4	P55265	ADAR	LVDQSGPPHEPK	C57H90N16O19[M+3H]	LVDQSGPPHEPK(+H3)	435.226	39.73	1.89277e+06
GPS03	GPS03_1.raw	sp|P55265|DSRAD_HUMANDouble-strandedRNA-specificadenosinedeaminaseOS=HomosapiensGN=ADARPE=1SV=4	P55265	ADAR	LVDQSGPPHEPK	C57H90N16O19[M+3H]	LVDQSGPPHEPK(+H3)	435.226	39.73	1.96591e+06
GPS04	GPS04_1.raw	sp|P55265|DSRAD_HUMANDouble-strandedRNA-specificadenosinedeaminaseOS=HomosapiensGN=ADARPE=1SV=4	P55265	ADAR	LVDQSGPPHEPK	C57H90N16O19[M+3H]	LVDQSGPPHEPK(+H3)	435.226	39.73	1.81861e+06
GPS05	GPS_05_01.raw	sp|P55265|DSRAD_HUMANDouble-strandedRNA-specificadenosinedeaminaseOS=HomosapiensGN=ADARPE=1SV=4	P55265	ADAR	LVDQSGPPHEPK	C57H90N16O19[M+3H]	LVDQSGPPHEPK(+H3)	435.226	39.73	1.89591e+06
GPS06	GPS_06_01.raw	sp|P55265|DSRAD_HUMANDouble-strandedRNA-specificadenosinedeaminaseOS=HomosapiensGN=ADARPE=1SV=4	P55265	ADAR	LVDQSGPPHEPK	C57H90N16O19[M+3H]	LVDQSGPPHEPK(+H3)	435.226	39.73	1.97909e+06
1_1	1_1_01.raw	sp|P55265|DSRAD_HUMANDouble-strandedRNA-specificadenosinedeaminaseOS=HomosapiensGN=ADARPE=1SV=4	P55265	ADAR	LVDQSGPPHEPK	C57H90N16O19[M+3H]	LVDQSGPPHEPK(+H3)	435.226	39.73	2.31627e+06
1_2	1_2_01.raw	sp|P55265|DSRAD_HUMANDouble-strandedRNA-specificadenosinedeaminaseOS=HomosapiensGN=ADARPE=1SV=4	P55265	ADAR	LVDQSGPPHEPK	C57H90N16O19[M+3H]	LVDQSGPPHEPK(+H3)	435.226	39.73	2.31943e+06
1_3	1_3_01.raw	sp|P55265|DSRAD_HUMANDouble-strandedRNA-specificadenosinedeaminaseOS=HomosapiensGN=ADARPE=1SV=4	P55265	ADAR	LVDQSGPPHEPK	C57H90N16O19[M+3H]	LVDQSGPPHEPK(+H3)	435.226	39.73	2.0672e+06
2_1	2_1_01.raw	sp|P55265|DSRAD_HUMANDouble-strandedRNA-specificadenosinedeaminaseOS=HomosapiensGN=ADARPE=1SV=4	P55265	ADAR	LVDQSGPPHEPK	C57H90N16O19[M+3H]	LVDQSGPPHEPK(+H3)	435.226	39.73	3.11118e+06
2_2	2_2_01.raw	sp|P55265|DSRAD_HUMANDouble-strandedRNA-specificadenosinedeaminaseOS=HomosapiensGN=ADARPE=1SV=4	P55265	ADAR	LVDQSGPPHEPK	C57H90N16O19[M+3H]	LVDQSGPPHEPK(+H3)	435.226	39.73	1.0305e+06
2_3	2_3_01.raw	sp|P55265|DSRAD_HUMANDouble-strandedRNA-specificadenosinedeaminaseOS=HomosapiensGN=ADARPE=1SV=4	P55265	ADAR	LVDQSGPPHEPK	C57H90N16O19[M+3H]	LVDQSGPPHEPK(+H3)	435.226	39.73	1.66075e+06
3_1	3_1_01.raw	sp|P55265|DSRAD_HUMANDouble-strandedRNA-specificadenosinedeaminaseOS=HomosapiensGN=ADARPE=1SV=4	P55265	ADAR	LVDQSGPPHEPK	C57H90N16O19[M+3H]	LVDQSGPPHEPK(+H3)	435.226	39.73	2.6656e+06
3_2	3_2_01_171223210221.raw	sp|P55265|DSRAD_HUMANDouble-strandedRNA-specificadenosinedeaminaseOS=HomosapiensGN=ADARPE=1SV=4	P55265	ADAR	LVDQSGPPHEPK	C57H90N16O19[M+3H]	LVDQSGPPHEPK(+H3)	435.226	39.73	2.18626e+06
[truncated: 46,245 more rows]

## Sheet: Table S7
Table S7.Peptide differential abundance analysis (imputed missing values marked in blue, log2-transformed, t-test)
[truncated: 52 more rows]

[truncated: 8 more sheets: Table S8, Table S9, Table S10, Table S11, Table S12, Table S13, Table S14, Table_S15]
